# Supplementary material for: One-pot ester and thioester formation mediated by pentafluoropyridine (PFP)
Source: Royal Society of Chemistry journal article supplement (doi:10.1039/d2ob01268e), 2022-01-01
Supplement: d2ob01268e1.pdf [file d2ob01268e1.pdf]

## One-pot ester and thioester formation mediated by pentafluoropyridine (PFP)

Liam N. D. Beardmore,<sup>a</sup> Steven L. Cobb <sup>\*a</sup> and William D. G. Brittain <sup>\*a</sup>

<sup>a</sup>Department of Chemistry, Durham University, South Road, Durham, DH1 3LE, United Kingdom

\*Corresponding Author email: [william.d.brittain@durham.ac.uk](mailto:william.d.brittain@durham.ac.uk) [s.l.cobb@durham.ac.uk](mailto:s.l.cobb@durham.ac.uk)

### Contents

|                                            |       |
|--------------------------------------------|-------|
| General.....                               | S-1   |
| General Method for esterification.....     | S-2   |
| General Method for thioesterification..... | S-2   |
| NMR Study of acyl fluoride formation.....  | S-26  |
| NMR Data for synthesised Compounds.....    | S-29  |
| References.....                            | S-112 |

### Experimental

#### *General*

All starting materials and reagents were purchased from commercial sources and used as received. MeCN was dried over 4 Å molecular sieves which had been dried under vacuum at 150 °C for 3 h. All reactions were conducted under an atmosphere of air. Column chromatography was carried out on silica purchased from Fluorochem using hexane/ethyl acetate solvent systems or using a Combiflash Nextgen 100 equipped with a 4g redisepp column using hexane/ethyl acetate solvent systems.

<sup>1</sup>H NMR spectra were recorded at 400 or 600 MHz using Bruker Avance III or Varian VNMRS-600 spectrometers respectively. <sup>13</sup>C NMR spectra were recorded at 100 or 151 MHz using a Bruker Avance III or Varian VNMRS-600 respectively. <sup>19</sup>F NMR spectra were recorded at 376 MHz using a Bruker Avance III spectrometer. All coupling constants are reported in Hertz (Hz). In cases where it was required 2D NMR techniques were used to confirm compound identity. Chemical shifts are reported in ppm and are referenced to residual solvent peaks; CHCl<sub>3</sub> (<sup>1</sup>H 7.26 ppm, <sup>13</sup>C 77.0 ppm), CH<sub>3</sub>CN (<sup>1</sup>H 1.94 ppm, <sup>13</sup>C ppm) or DMSO (<sup>1</sup>H 2.50 ppm, <sup>13</sup>C 39.5 ppm).

Mass spectra were collected either using ESI-LC or GCMS. ESI-LC in MeCN were collected using a Waters TQD mass spectrometer with a Acquity UPLC BEH C18 1.7  $\mu\text{m}$  (2.1 mm x 50 mm). ESI-LC was collected using water containing formic acid (0.1% v/v) and MeCN mixture in a 95:5 to 5:95 gradient over 5 min. GCMS experiments were carried out on a Shimadzu QP2010-Ultra with a Rxi-5Sil MS (0.15 $\mu\text{m}$  x 10m x 0.15 mm). Helium was employed as the carrier gas (0.41 mL/min). EI is carried at 70eV and the working mass range is 35 – 650 u for all GCMS experiments.

ASAP samples were run isothermally at 350 °C vaporising the sample to enable atmospheric pressure chemical ionisation.

### **General procedure for the synthesis of esters**

To an oven dried glass vial or Radley's carousel tube equipped with a stirrer bar was added carboxylic acid (1.0 equiv.), acetonitrile dried over 4 Å molecular sieves (3 mL), diisopropylethylamine (DIPEA) (2.0 equiv.) and pentafluoropyridine (PFP) (1.1 equiv.). This mixture was allowed to stir at 50 °C for 4 h, at which point the desired alcohol (1.0 equiv.) was added. The mixture was then stirred at 50 °C for 16 h. Following this time, the mixture was concentrated under reduced pressure, the resulting residue was dissolved in a minimum amount of DCM and the recovered crude material was purified directly by flash column chromatography which yielded the desired compounds.

### **General procedure for the synthesis of thioesters**

To an oven dried glass vial or Radley's carousel tube equipped with a stirrer bar was added carboxylic acid (1.0 equiv.), acetonitrile dried over 4 Å molecular sieves (3 mL), diisopropylethylamine (DIPEA) (2.0 equiv.) and pentafluoropyridine (1.1 equiv.). This mixture was allowed to stir for a period of 4 h, after which thiol (1.0 equiv.) was added. The mixture was then allowed to stir at 50 °C for 16 h after this time, the mixture was allowed to cool, was concentrated under reduced pressure, and the resulting residue was dissolved in a minimum amount of dichloromethane (DCM) and purified directly by flash column chromatography which yielded the desired compounds.

### Synthesis of 4-methoxyphenyl benzoate (5a)

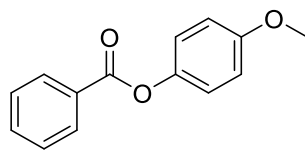

Synthesised according to the general method for esterification from benzoic acid (0.102 g, 0.84 mmol) and 4-methoxyphenol (0.105 g, 0.86 mmol). The crude material was purified by flash column chromatography (100% hexane to 2.5% EtOAc 97.5% hexane) to give the desired product as a white solid in 71% yield (0.135 g).

Characterisation data was consistent with previously reported literature values.<sup>1</sup>

<sup>1</sup>H NMR (400 MHz, CDCl<sub>3</sub>) δ 8.25 – 8.22 (m, 2H), 7.64 (t, *J* = 7.5, 1H), 7.52 (t, *J* = 7.5, 2H), 7.17 (d, *J* = 9.1, 2H), 6.97 (d, *J* = 9.1, 2H), 3.83 (s, 3H).

<sup>13</sup>C NMR (101 MHz, CDCl<sub>3</sub>) δ 165.5, 157.3, 144.4, 133.5, 130.1, 129.6, 128.6, 122.5, 114.5, 55.6.

LCMS (ESI<sup>+</sup>) *rt* = 2.7 mins, *m/z* = 229.2 [M+H]<sup>+</sup>

### Synthesis of isopropyl benzoate (5b)

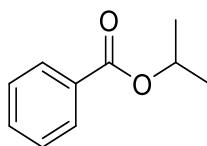

Synthesised according to the general method for esterification from benzoic acid (0.105 g, 0.86 mmol) and isopropanol (0.057 g, 0.095 mmol). The crude material was purified by automated flash column chromatography combiflash (eluted in 100% hexanes) to give the desired product as a colourless oil in 41% yield (0.055g).

Characterisation data was consistent with previously reported literature values.<sup>2</sup>

<sup>1</sup>H NMR (400 MHz, CDCl<sub>3</sub>) δ 8.06 – 8.03 (m, 2H), 7.56 – 7.52 (m, 1H), 7.43 (ddt, *J* = 8.1, 6.8, 1.0, 2H), 5.26 (hept, *J* = 6.3, 1H), 1.37 (d, *J* = 6.3, 6H).

<sup>13</sup>C NMR (101 MHz, CDCl<sub>3</sub>) δ 166.2, 132.8, 131.0, 129.6, 128.4, 68.4, 22.0.

GCMS (EI<sup>+</sup>) *r.t* = 3.3 mins, *m/z* = 164.1 [M]<sup>+</sup>

### Synthesis of phenyl benzoate (5d)

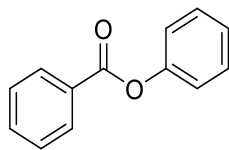

Synthesised according to the general method for esterification from benzoic acid (0.100 g, 0.82 mmol) and phenol (0.082 g, 0.87 mmol). The crude material was purified by flash column chromatography (100% hexane to 5% EtOAc 95% hexane) to give the desired product as a white solid 80% yield (0.130 g)

Characterisation data were consistent with previously reported literature values.<sup>3</sup>

<sup>1</sup>H NMR (400 MHz, CDCl<sub>3</sub>) δ 8.30 – 8.26 (m, 2H), 7.71 – 7.66 (m, 1H), 7.59-7.54 (m, 2H), 7.51 – 7.46 (m, 2H), 7.35 – 7.26 (m, 3H).

<sup>13</sup>C NMR (101 MHz, CDCl<sub>3</sub>) δ 165.3, 151.1, 133.7, 130.3, 130.2, 130.1, 129.7, 129.6, 128.7, 126.0, 121.82.

LCMS (ESI<sup>+</sup>) r.t. = 2.8 mins, *m/z* = 199.2 [M+H]<sup>+</sup>

### Synthesis of benzyl benzoate (5e)

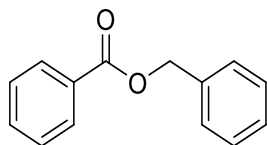

Synthesised according to the general method for esterification from benzoic acid (0.101 g, 0.83 mmol) and benzyl alcohol (0.090 g, 0.83 mmol). The crude material was purified by flash column chromatography (100% hexane to 2.5% EtOAc 97.5% hexane) to give the desired product as a colourless oil in 72% yield (0.122 g)

Characterisation data were consistent with previously reported literature values.<sup>3</sup>

<sup>1</sup>H NMR (599 MHz, CDCl<sub>3</sub>) δ 8.15-8.12z (m, 2H), 7.60-7.56 (m, 1H), 7.51 – 7.38 (m, 7H), 5.41 (s, 2H).

<sup>13</sup>C NMR (151 MHz, CDCl<sub>3</sub>) δ 166.7, 136.4, 133.3, 130.5, 130.0, 128.9, 128.7, 128.5, 128.5, 67.0.

GCMS (EI<sup>+</sup>) – r.t. = 4.8 mins,  $m/z$  = 212.1 [M]<sup>+</sup>

### Synthesis of *o*-tolyl benzoate (5f)

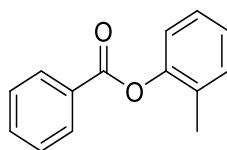

Synthesised according to the general method for esterification from benzoic acid (0.101, 0.83 mmol) and *o*-cresol (0.092 g, 0.85 mmol). The crude material was purified using automated flash column chromatography combiflash (100% Hexane for 4 mins to 40% EtOAc 60% Hexane for 10 mins) to give the desired product as a clear oil in 67% yield (0.116 g).

Characterisation data were consistent with previously reported literature values.<sup>4</sup>

<sup>1</sup>H NMR (400 MHz, CDCl<sub>3</sub>) δ 8.29 – 8.27 (m, 2H), 7.68 – 7.66 (m, 1H), 7.58 – 7.54 (m, 2H), 7.33 – 7.18 (m, 4H), 2.29 (s, 3H).

<sup>13</sup>C NMR (101 MHz, CDCl<sub>3</sub>) δ 164.9, 149.6, 133.7, 131.3, 130.4, 130.2, 129.6, 128.7, 127.1, 126.2, 122.1, 16.3.

LCMS (ESI<sup>+</sup>) r.t. = 2.9 mins,  $m/z$  = 213.3 [M+H]<sup>+</sup>

### Synthesis of 4-nitrophenyl benzoate (5g)

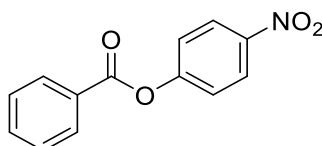

Synthesised according to the general method for esterification from benzoic acid (0.101 g, 0.83 mmol) and 4-nitrophenol (0.112 g, 0.81 mmol). The crude material was purified by flash column chromatography (100% hexane to 2.5% EtOAc 97.5% hexane) to give the desired product as a white solid in 58% yield (0.115 g)

Characterisation data were consistent with previously reported literature values.<sup>5</sup>

<sup>1</sup>H NMR (400 MHz, CDCl<sub>3</sub>) δ 8.34 – 8.28 (m, 2H), 8.24 – 8.18 (m, 2H), 7.71-7.64 (m, 1H), 7.58 – 7.51 (m, 2H), 7.46 – 7.39 (m, 2H).

<sup>13</sup>C NMR (101 MHz, CDCl<sub>3</sub>) δ 164.3, 155.8, 145.5, 134.4, 130.4, 128.9, 128.6, 125.4, 122.8.

LCMS (ESI<sup>-</sup>) - r.t. = 3.8 mins,  $m/z$  = 242.1 (M)<sup>-</sup>

### Synthesis of (5h)

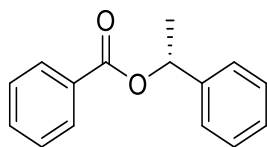

Synthesised according to the general method for esterification from benzoic acid (0.103 g, 0.84 mmol) and (*S*)-(-)-1-phenylethanol (0.102 g, 0.83 mmol). Purified using automated column chromatography combiflash (eluted in 100% hexanes) to give the desired product as a clear oil in 48% yield (0.091 g).

Characterisation data were consistent with previously reported literature values.<sup>6</sup>

<sup>1</sup>H NMR (400 MHz, CDCl<sub>3</sub>) δ 8.13 – 8.10 (m, 2H), 7.69 – 7.55 (m, 1H), 7.49 – 7.43 (m, 4H), 7.42 – 7.37 (m, 2H), 7.35 – 7.30 (m, 1H), 6.16 (q, *J* = 6.6, 1H), 1.70 (d, *J* = 6.6, 3H).

<sup>13</sup>C NMR (101 MHz, CDCl<sub>3</sub>) δ 165.8, 141.8, 133.0, 130.6, 129.7, 128.6, 128.4, 127.9, 126.1, 73.0, 22.5.

GCMS (EI<sup>+</sup>) r.t. = 4.8 mins,  $m/z$  = 226.2 [M]<sup>+</sup>

### Synthesis of 2,6-dimethylphenyl benzoate (5i)

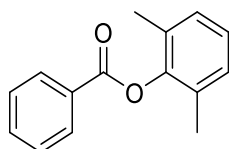

Synthesised according to the general method for esterification from benzoic acid (0.099 g, 0.81 mmol) and 2,6-dimethylphenol (0.103 g, 0.84 mmol). The crude material was purified using automated flash column chromatography combiflash (eluted in 100% hexanes) to give the desired product as a clear oil in 92% yield (0.172 g).

Characterisation data was consistent with previously reported literature values.<sup>5</sup>

<sup>1</sup>H NMR (400 MHz, CDCl<sub>3</sub>) δ 8.30 – 8.28 (m, 2H), 7.70 – 7.66 (m, 1H), 7.58 – 7.54 (m, 2H), 7.16 – 7.11 (m, 3H), 2.24 (s, 6H).

<sup>13</sup>C NMR (101 MHz, CDCl<sub>3</sub>) δ 164.5, 148.4, 133.7, 130.5, 130.3, 129.4, 128.8, 128.7, 126.0, 16.5.

LCMS (ESI<sup>+</sup>) r.t. = 3.1 mins,  $m/z = 227.2$  [M+H]<sup>+</sup>

### Synthesis of pyridine-3-yl-benzoate (5j)

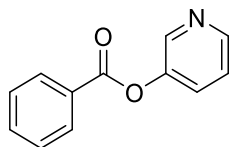

Synthesised according to the general method for esterification from benzoic acid (0.100 g, 0.82 mmol) and 3-hydroxypyridine (0.081 g, 0.85 mmol). The crude material was purified by flash column chromatography (100% hexane to 5% EtOAc 95% hexane) to give the desired product as an orange solid in 80% yield (0.130 g).

Characterisation data was consistent with previously reported literature.<sup>7</sup>

<sup>1</sup>H NMR (400 MHz, CDCl<sub>3</sub>)  $\delta$  8.56-8.55 (m, 1H), 8.54 (dd,  $J = 4.8, 1.4$ , 1H), 8.24 – 8.18 (m, 2H), 7.69 – 7.64 (m, 1H), 7.62 (ddd,  $J = 8.3, 2.7, 1.4$ , 1H), 7.53 – 7.48 (m, 2H), 7.36 (ddd,  $J = 8.3, 4.8, 0.7$ , 1H).

<sup>13</sup>C NMR (101 MHz, CDCl<sub>3</sub>)  $\delta$  164.7, 147.6, 147.0, 143.6, 134.0, 130.3, 129.4, 128.8, 128.7, 124.0

LCMS (ESI<sup>+</sup>) r.t. = 2.5 mins,  $m/z = 200.1$  [M+H]<sup>+</sup>

### Synthesis of butyl benzoate (5k)

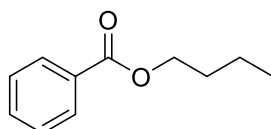

Synthesised according to the general method for esterification from benzoic acid (0.100 g, 0.82 mmol) and butan-1-ol (0.067 g, 0.90 mmol). The crude material was purified by flash column chromatography (100% hexane to 5% EtOAc 95% hexane) to give the desired product as a clear oil in 64% yield (0.093 g).

Characterisation data was consistent with previously reported literature values.<sup>8</sup>

<sup>1</sup>H NMR (400 MHz, CDCl<sub>3</sub>)  $\delta$  8.07 – 8.03 (m, 2H), 7.56 – 7.52 (m, 1H), 7.45 – 7.40 (m, 2H), 4.32 (t,  $J = 6.6$ , 2H), 1.79 – 1.71 (m, 2H), 1.53 – 1.43 (m, 2H), 0.98 (t,  $J = 7.4$ , 3H).

$^{13}\text{C}$  NMR (101 MHz,  $\text{CDCl}_3$ )  $\delta$  166.68, 132.80, 130.54, 129.54, 128.32, 64.83, 30.80, 19.30, 13.79.

LCMS ( $\text{ESI}^+$ ) r.t. = 2.9 mins,  $m/z$  = 179.2  $[\text{M}+\text{H}]^+$

### Synthesis of hexyl benzoate (5l)

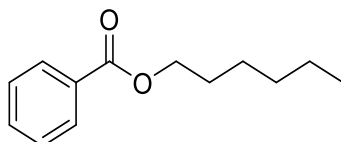

Synthesised according to the general method for esterification from benzoic acid (0.100g, 0.82 mmol) and hexan-1-ol (0.089 g, 0.87 mmol). The crude material was purified by automated flash column chromatography (100% hexane) to give the desired product as a clear oil in 78% yield (0.131 g).

Characterisation data was consistent with reported literature.<sup>8</sup>

$^1\text{H}$  NMR (400 MHz,  $\text{CDCl}_3$ )  $\delta$  8.11 – 8.01 (m, 2H), 7.58 – 7.49 (m, 1H), 7.48 – 7.36 (m, 2H), 4.31 (t,  $J$  = 6.7, 2H), 1.76 (dq,  $J$  = 8.0, 6.7, 2H), 1.53 – 1.37 (m, 2H), 1.40 – 1.29 (m, 4H), 0.97 – 0.85 (m, 3H).

$^{13}\text{C}$  NMR (101 MHz,  $\text{CDCl}_3$ )  $\delta$  166.7, 132.8, 130.6, 129.6, 128.4, 77.5, 77.1, 76.8, 65.2, 31.5, 28.8, 25.8, 22.6, 14.1.

LCMS ( $\text{ESI}^+$ ) r.t. = 3.4 mins,  $m/z$  = 207.3  $[\text{M}+\text{H}]^+$

### Gram Synthesis of hexyl benzoate (5l)

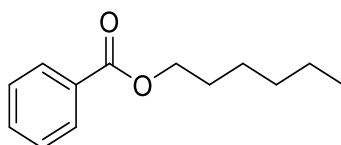

Following the general method but in a round bottomed flask, using 10 mL of MeCN. Synthesised from benzoic acid (1.001 g, 8.2 mmol) and hexan-1-ol (0.871 g, 8.5 mmol). Purified by automated column chromatography (100% hexane) to yield the desired product as a clear oil in 61% yield (1.030 g)



Characterisation data were consistent with those previously recorded for (5k)

### Synthesis of Benzyl picolinate (5m)

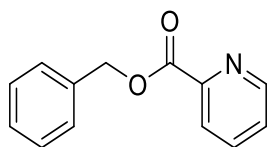

Synthesised according to the general method for esterification from picolinic acid (0.105 g, 0.85 mmol) and benzyl alcohol (0.88 g, 0.81 mmol). Purified using automated column chromatography combiflash (100% Hexane to 60% Hexane 40% EtOAc gradient) to give the desired product as a red coloured oil in 68% yield (0.118 g)

Characterisation data were consistent with previously reported literature values.<sup>6</sup>

<sup>1</sup>H NMR (400 MHz, CDCl<sub>3</sub>) δ 8.74 (ddd, *J* = 4.8, 1.8, 0.9, 1H), 8.10 (dt, *J* = 7.9, 1.1, 1H), 7.78 (td, *J* = 7.8, 1.8, 1H), 7.50 – 7.26 (m, 6H), 5.44 (s, 2H).

<sup>13</sup>C NMR (101 MHz, CDCl<sub>3</sub>) δ 164.9, 149.9, 147.9, 137.0, 135.6, 128.6, 128.5, 128.4, 126.9, 125.2, 67.4.

GCMS (EI<sup>+</sup>) r.t. = 4.9 mins, *m/z* 213.1 [M]<sup>+</sup>

### Synthesis of benzyl 3-(trifluoromethyl)benzoate (5n)

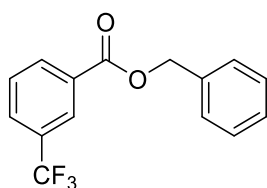

Synthesised according to the general method for esterification from 3-(trifluoromethyl)benzoic acid (0.105 g, 0.55 mmol) and benzyl alcohol (0.064 g, 0.59 mmol). Purified using automated flash column chromatography combiflash (eluted in 100% hexane) to give the desired product as a colourless oil in 55% yield (0.085 g).

Characterisation data were consistent with previously reported literature values.<sup>9</sup>

$^1\text{H}$  NMR (400 MHz,  $\text{CDCl}_3$ )  $\delta$  8.36 (app s, 1H), 8.31 – 8.24 (m, 1H), 7.82 (m, 1H), 7.59 (tt,  $J = 7.8, 0.8$ , 1H), 7.54 – 7.33 (m, 5H), 5.42 (s, 2H).

$^{19}\text{F}$  NMR (376 MHz,  $\text{CDCl}_3$ )  $\delta$  -62.75 (s, 3F)

$^{13}\text{C}$  NMR (101 MHz,  $\text{CDCl}_3$ )  $\delta$  165.2, 135.7, 133.0, 131.2 (q,  $J = 33.0$ ), 129.7 (q,  $J = 3.8$ ), 129.2, 128.8, 128.6, 128.5, 126.7 (q,  $J = 3.8$ ), 125.1, 122.4, 67.4.

GCMS ( $\text{EI}^+$ ) r.t = 4.6 mins,  $m/z = 280.12$   $[\text{M}]^+$

### Synthesis of benzyl 2-iodobenzoate (5o)

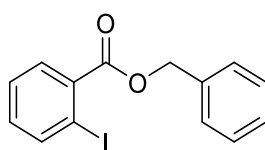

Synthesised according to the general method for esterification from 2-iodobenzoic acid (0.100 g, 0.40 mmol) and benzyl alcohol (0.052 g, 0.48 mmol). Purified using automated flash column chromatography combiflash (eluted in 100% hexane) to give the desired product as a colourless oil in 57% yield (0.077 g).

Characterisation data were consistent with previously reported literature values.<sup>10</sup>

$^1\text{H}$  NMR (400 MHz,  $\text{CDCl}_3$ )  $\delta$  7.99 (dd,  $J = 7.9, 1.2$ , 1H), 7.82 (dt,  $J = 7.9, 1.5$ , 1H), 7.50 – 7.48 (m, 2H), 7.43 – 7.36 (m, 4H), 7.14 (td,  $J = 7.7, 1.7$ , 1H), 5.39 (s, 2H).

$^{13}\text{C}$  NMR (101 MHz,  $\text{CDCl}_3$ )  $\delta$  166.3, 141.4, 135.5, 135.0, 132.8, 131.1, 128.7, 128.6, 128.5, 128.0, 94.3, 67.5.

GCMS ( $\text{EI}^+$ ) r.t. = 5.5 mins,  $m/z = 338.1$   $[\text{M}]^+$

### Synthesis of 4-nitrophenyl 4-methoxybenzoate (5p)

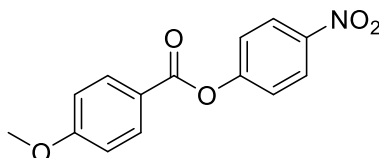

Synthesised according to the general method for esterification from 4-methoxybenzoic acid (0.100 g, 0.66 mmol) and 4-nitrophenol (0.096 g, 0.66 mmol). Purified using automated flash

column chromatography combiflash (100% hexane for 6 mins to 50% hexane 50% EtOAc for 12 mins) to give the desired product as a cream solid in 49% yield (0.089 g).

Characterisation data were consistent with previously reported literature values.<sup>11</sup>

<sup>1</sup>H NMR (400 MHz, CDCl<sub>3</sub>) δ 8.31 (m, 2H), 8.19 – 8.11 (m, 2H), 7.44 – 7.36 (m, 2H), 7.04 – 6.96 (m, 2H), 3.91 (s, 3H).

<sup>13</sup>C NMR (101 MHz, CDCl<sub>3</sub>) δ 164.5, 164.0, 156.1, 145.4, 132.7, 125.3, 122.8, 120.8, 114.2, 55.7.

GCMS (EI<sup>+</sup>) r.t. = 6.0 mins, *m/z* = 135.2 [M]<sup>+</sup>

### Synthesis of 4-methoxyphenyl 4-bromobenzoate (5q)

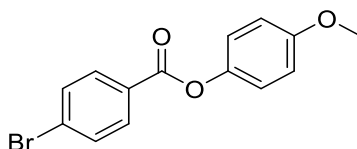

Synthesised according to the general method for esterification from 4-bromobenzoic acid (0.100 g, 0.50 mmol) and 4-methoxyphenol (0.061 g, 0.50 mmol). The crude material was purified by flash column chromatography (eluted in 100% hexane) to give the desired product as a white solid in 50% yield (0.075 g).

Characterisation data were consistent with previously reported literature values.<sup>12</sup>

<sup>1</sup>H NMR (400 MHz, CDCl<sub>3</sub>) δ 8.07 – 8.04 (m, 2H), 7.66 – 7.63 (m, 2H), 7.15 – 7.1 (m, 2H), 6.96 – 6.92 (m, 2H), 3.82 (s, 3H).

<sup>13</sup>C NMR (101 MHz, CDCl<sub>3</sub>) δ 164.9, 157.5, 144.3, 132.0, 131.7, 128.8, 128.6, 122.4, 114.6, 55.7.

LCMS (ESI<sup>+</sup>) r.t. = 3.1 mins, *m/z* = 307.12 [M+H]<sup>+</sup>

### Synthesis of benzyl 4-bromobenzoate (5r)

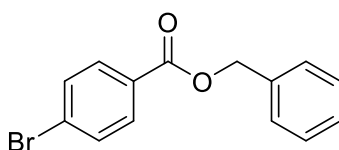

Synthesised according to the general method for esterification from 4-bromobenzoic acid (0.104 g, 0.52 mmol) and benzyl alcohol (0.061 g, 0.50 mmol). The crude material was purified by flash column chromatography (100% hexane to 5% EtOAc 95% hexane) to give the desired product as a clear oil in 69% yield (0.100 g).

Characterisation data were consistent with previously reported literature values.<sup>13</sup>

<sup>1</sup>H NMR (400 MHz, CDCl<sub>3</sub>) δ 7.96 – 7.93 (m, 2H), 7.60 – 7.57 (m, 2H), 7.47 – 7.36 (m, 5H), 5.37 (s, 2H).

<sup>13</sup>C NMR (101 MHz, CDCl<sub>3</sub>) δ 165.8, 135.8, 131.8, 131.3, 129.1, 128.7, 128.5, 128.3, 128.3, 67.1.

GCMS (EI<sup>+</sup>) r.t. = 5.3 mins, *m/z* = 290.1 [M]<sup>+</sup>

#### Synthesis of 4-bromophenyl 4-bromobenzoate (5s)

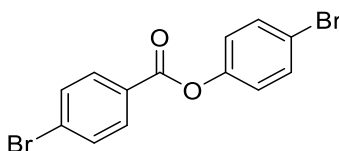

Synthesised according to the general method for esterification from 4-bromobenzoic acid (0.099 g, 0.49 mmol) and 4-bromophenol (0.087 g, 0.50 mmol). Purified using automated flash column chromatography combiflash (eluted in 100% hexane) to give the product as a white solid in 18% yield (0.031 g).

Characterisation data was consistent with previously reported literature values.<sup>14</sup>

<sup>1</sup>H NMR (400 MHz, CDCl<sub>3</sub>) δ 8.08 – 8.01 (m, 2H), 7.70 – 7.62 (m, 2H), 7.59 – 7.50 (m, 2H), 7.14 – 7.07 (m, 2H).

<sup>13</sup>C NMR (101 MHz, CDCl<sub>3</sub>) δ 164.2, 149.8, 132.6, 132.1, 131.7, 129.1, 128.1, 123.5, 119.2.

GCMS (EI<sup>+</sup>) r.t. = 5.7 mins, *m/z* = 353.9, 355.9, 357.9 [M]<sup>+</sup>

#### Synthesis of 4-bromophenyl 4-bromobenzoate (5s)

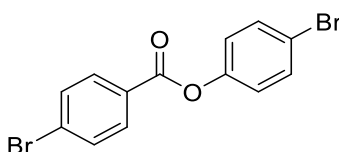

Alternatively synthesised from 4-bromobenzoic acid (0.113 g, 0.56 mmol) and 4-bromophenol (0.094, 0.54 mmol). Following the general method for esterification but heated in a sealed pressure tube at 100°C throughout. Purified using the combiflash equipped with a rediseq 12 g column (eluted in 100% hexanes) to yield a white solid in 77% yield (0.148 g).

Characterisation data

### Synthesis of Phenyl Octanoate (5t)

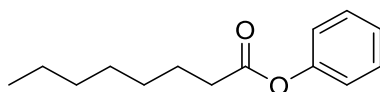

Synthesised according to the general method for esterification from octanoic acid (0.099 g, 0.69 mmol) and phenol (0.065 g, 0.69 mmol). The crude material was purified by flash column chromatography (100% hexane to 10% EtOAc 90% hexane) to give the desired product as a clear oil in 79% yield (0.120 g).

Characterisation data was consistent with previously reported literature values.<sup>15</sup>

<sup>1</sup>H NMR (400 MHz, CDCl<sub>3</sub>) δ 7.44 – 7.39 (m, 2H), 7.28 – 7.23 (m, 1H), 7.14 – 7.10 (m, 2H), 2.60 (t, *J* = 7.5, 2H), 1.80 (p, *J* = 7.5, 2H), 1.5 – 1.31 (m, 8H), 0.97 – 0.93 (m, 3H).

<sup>13</sup>C NMR (101 MHz, CDCl<sub>3</sub>) δ 172.4, 150.9, 129.5, 125.8, 121.7, 34.5, 31.8, 29.2, 29.0, 25.0, 22.7, 14.2.

LCMS (ESI<sup>+</sup>) r.t. = 3.6 mins, *m/z* = 221.3 [M+H]<sup>+</sup>

### Synthesis of Benzyl Octanoate (5u)

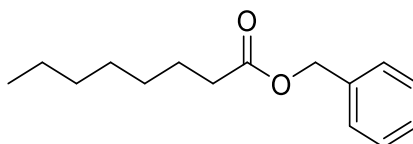

Synthesised according to the general method for esterification from octanoic acid (0.099 g, 0.69 mmol) and benzyl alcohol (0.079 g, 0.73 mmol). The crude material was purified by flash

column chromatography (100% hexane to 10% EtOAc 90% hexane) to give the desired product as a clear oil in 75% yield (0.129 g).

Characterisation data were consistent with previously reported literature values.<sup>16</sup>

<sup>1</sup>H NMR (400 MHz, CDCl<sub>3</sub>) δ 7.39 – 7.31 (m, 5H), 5.13 (s, 2H), 2.37 (t, *J* = 7.5, 2H), 1.72 – 1.62 (m, 2H), 1.37 – 1.23 (m, 8H), 0.91 – 0.87 (m, 3H).

<sup>13</sup>C NMR (101 MHz, CDCl<sub>3</sub>) δ 173.8, 136.2, 128.6, 128.3, 128.2, 66.1, 34.4, 31.8, 29.2, 29.0, 25.1, 22.7, 14.2.

GCMS (EI<sup>+</sup>) r.t. = 4.7, *m/z* = 234.2 [M]<sup>+</sup>

### Synthesis of Benzyl Propionate (5v)

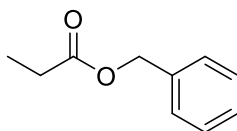

Synthesised according to the general method\* of esterification from propionic acid (0.100 g, 1.35 mmol) and benzyl alcohol (0.152 g, 1.41 mmol). The crude material was purified using automated flash column chromatography combiflash (eluted in 100% hexane) to give the desired product as a colourless oil in 48% yield (0.107 g)

Characterisation data was consistent with previously reported literature values.<sup>17</sup>

<sup>1</sup>H NMR (400 MHz, CDCl<sub>3</sub>) δ 7.40 – 7.32 (m, 5H), 5.13 (s, 2H), 2.40 (q, *J* = 7.6, 2H), 1.18 (t, *J* = 7.6, 3H).

<sup>13</sup>C NMR (101 MHz, CDCl<sub>3</sub>) δ 174.4, 136.2, 128.6, 128.3, 66.2, 27.7, 9.2.

GCMS (EI<sup>+</sup>) r.t. = 3.4 mins, *m/z* = 164.1 [M]<sup>+</sup>

\*Performed at 35°C

### Synthesis of benzyl cinnamate (5w)

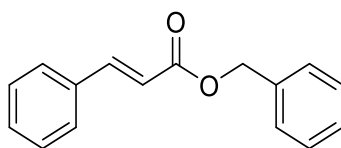

Synthesised according to the general method for esterification from cinnamic acid (0.103 g, 0.070 mmol) and benzyl alcohol (0.084 g, 0.77 mmol). Purified using automated flash column

chromatography combiflash (eluted in step gradient hexane 100% to hexane 99.2% EtOAc 0.8% ) to give the desired product as a colourless oil in 80% yield (0.132 g).

Characterisation data were consistent with previously reported literature values.<sup>18</sup>

<sup>1</sup>H NMR (400 MHz, CDCl<sub>3</sub>) δ 7.77 (d, *J* = 16.0, 1H), 7.55 – 7.53 (m, 2H), 7.46 – 7.38 (m, 8H), 6.52 (d, *J* = 16.0, 1H), 5.28 (s, 2H).

<sup>13</sup>C NMR (101 MHz, CDCl<sub>3</sub>) δ 166.9, 145.3, 136.2, 134.4, 130.4, 129.0, 128.7, 128.4, 128.3, 128.2, 118.0, 66.4.

LCMS (ESI<sup>+</sup>) r.t. = 3.1 mins, *m/z* = 239.2 [M+H]<sup>+</sup>

### Synthesis of (*S*)-2-phenylpropyl propionate (**5x**)

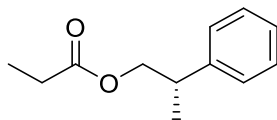

Synthesised according to the general method\* for esterification from propionic acid (0.101 g, 1.36 mmol) and 2-phenylpropanol (0.187 g, 1.37 mmol). The crude material was purified by flash column chromatography (hexane to 10% EtOAc 90% hexane) to give the desired product as a clear oil in 46% yield (0.120 g).

Characterisation data were consistent with previously reported literature values.<sup>19</sup>

<sup>1</sup>H NMR (400 MHz, CDCl<sub>3</sub>) δ 7.35 (dd, *J* = 7.9, 6.9, 2H), 7.30 – 7.22 (m, 3H), 4.30 – 4.13 (m, 2H), 3.15 (h, *J* = 7.1, 1H), 2.33 (q, *J* = 7.6, 2H), 1.35 (d, *J* = 7.0, 3H), 1.14 (t, *J* = 7.6, 3H).

<sup>13</sup>C NMR (101 MHz, CDCl<sub>3</sub>) δ 174.4, 143.3, 128.5, 127.4, 126.7, 69.3, 39.0, 27.6, 18.1, 9.2.

GCMS (EI<sup>+</sup>) r.t. = 3.8 mins, *m/z* 193.1 [M]<sup>+</sup>

\*Performed at 35°C

### Synthesis of benzyl (S)-2-(6-methoxynaphthalen-2-yl)propanoate (5y)

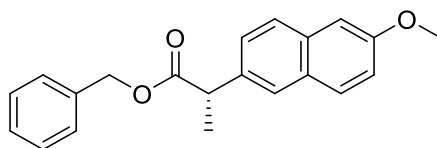

Synthesised according to the general method for esterification from naproxen (0.101 g, 0.44 mmol) and benzyl alcohol (0.053 g, 0.49 mmol). Purified using automated flash column chromatography combiflash (step gradient; 100% hexane for 4 mins, 90% hexane to EtOAc for 4 mins) to yield the product as a colourless oil in 69% yield (0.095 g).

Characterisation data was consistent with previously reported literature values.<sup>20</sup>

<sup>1</sup>H NMR (400 MHz, CDCl<sub>3</sub>) δ 7.76 – 7.71 (m, 3H), 7.46 (dd, *J* = 8.5, 1.8, 1H), 7.35 – 7.28 (m, 5H), 7.21 – 7.16 (m, 2H), 5.19 (m 2H), 3.95 (m, 4H), 1.65 (d, *J* = 7.1, 3H).

<sup>13</sup>C NMR (101 MHz, CDCl<sub>3</sub>) δ 174.6, 157.7, 136.1, 135.6, 133.8, 129.4, 129.0, 128.6, 128.2, 128.0, 127.2, 126.4, 126.1, 119.1, 105.6, 66.6, 55.4, 45.5, 18.7.

GCMS (EI<sup>+</sup>) r.t. = 6.4 mins, *m/z* = 320 [M+H]<sup>+</sup>

### Synthesis of 4-methoxyphenyl 2-(4-isobutylphenyl)propanoate (5z)

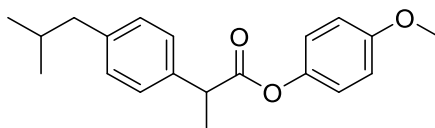

Synthesised according to the general method for esterification from ibuprofen (0.100 g, 0.48 mmol) and 4-methoxyphenol (0.061 g, 0.49 mmol). Purified using automated flash column chromatography combiflash (eluted in 100% hexane) to give the desired product as a clear oil in 63% yield (0.094 g).

Characterisation data were consistent with previously reported literature values.<sup>21</sup>

<sup>1</sup>H NMR (400 MHz, CDCl<sub>3</sub>) δ 7.34 – 7.31 (m, 2H), 7.18 – 7.15 (m, 2H), 6.98 – 6.90 (m, 2H), 6.89 – 6.83 (m, 2H), 3.94 (q, *J* = 7.1, 1H), 3.78 (s, 3H), 2.50 (d, *J* = 7.2, 2H), 1.97 – 1.82 (m, 1H), 1.62 (d, *J* = 7.1, 3H), 0.94 (d, *J* = 6.6, 6H).



$^{13}\text{C}$  NMR (101 MHz,  $\text{CDCl}_3$ )  $\delta$  173.7, 157.2, 144.5, 140.8, 137.5, 129.6, 127.3, 122.2, 114.4, 55.6, 45.3, 45.1, 30.3, 22.5, 18.7.

LCMS ( $\text{ESI}^+$ ) r.t = 3.6 mins,  $m/z$  = 313.4  $[\text{M}+\text{H}]^+$

### Synthesis of dibenzyl terephthalate (5aa)

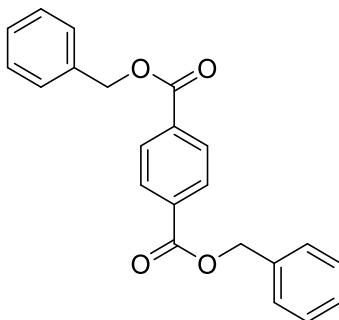

Synthesised according to the general method for esterification from terephthalic acid (0.100 g, 0.60 mmol) and benzyl alcohol (0.130 g, 1.20 mmol). The crude material was purified by automated flash column chromatography combiflash (100% hexane 4 mins to 20% EtOAc 80% hexane using a step gradient 9 mins) to give the desired product as a white solid in 40% yield (0.082 g).

Characterisation data were consistent with previously reported literature value.<sup>22</sup>

$^1\text{H}$  NMR (400 MHz,  $\text{CDCl}_3$ )  $\delta$  8.16 (s, 4H), 7.49 – 7.37 (m, 10H), 5.40 (s, 4H).

$^{13}\text{C}$  NMR (101 MHz,  $\text{CDCl}_3$ )  $\delta$  165.7, 135.7, 134.1, 129.8, 128.7, 128.5, 128.4, 67.2.

GCMS ( $\text{EI}^+$ ): r.t. = 6.9 mins,  $m/z$  346.5  $[\text{M}]^+$

### Synthesis of [1,1'-biphenyl]-2,2'-diyl dibenzoate (7a)

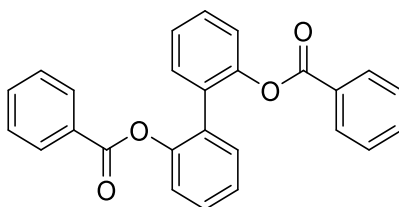

Synthesised according to the general method for esterification from benzoic acid (0.106 g, 0.87 mmol) and 2,2'-biphenol (0.076 g, 0.41 mmol, 0.82 mmol OH equivalent). The crude material was purified by flash column chromatography (100% hexane to 7.5% EtOAc 92.5% hexane) to give the desired product as a viscous clear oil in 85% yield (0.138 g).

$^1\text{H}$  NMR (599 MHz,  $\text{cdCl}_3$ )  $\delta$  8.00-7.98 (m, 2H), 7.57-7.54 (m, 1H), 7.43 – 7.36 (m, 4H), 7.30– 7.26 (m, 2H).

$^{13}\text{C}$  NMR (151 MHz,  $\text{cdCl}_3$ )  $\delta$  165.0, 148.5, 133.5, 131.3, 130.7, 130.1, 129.5, 129.1, 128.5, 126.0, 122.6.

LCMS ( $\text{ESI}^+$ ) r.t. = 3.3 mins,  $m/z$  = 395.3  $[\text{M}+\text{H}]^+$

HRMS – Calculated for  $[\text{M}+\text{H}]^+$   $\text{C}_{26}\text{H}_{19}\text{O}_4$  395.1283, found 395.1281

IR  $\nu_{\text{max}}$  (ATR)/ $\text{cm}^{-1}$  3069, 1732, 1601, 1474, 1449, 1248, 1192, 1059, 700

### Synthesis of oxybis(ethane-2,1-diyl) dibenzoate (7b)

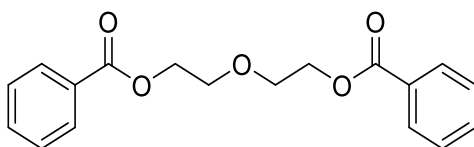

Synthesised according to the general method for esterification from benzoic acid (0.097 g, 0.79 mmol) and diethylene glycol (0.044 g, 0.41 mmol, 0.82 mmol OH equivalent). The crude material was purified by flash column chromatography (100% hexane to 20% EtOAc 80% hexane) to give the desired product as a viscous clear oil in 64% yield (0.082 g).

Characterisation data was consistent with previously reported literature values.<sup>23</sup>

$^1\text{H}$  NMR (400 MHz,  $\text{CDCl}_3$ )  $\delta$  8.05 – 8.02 (m, 4H), 7.56 – 7.51(m, 2H), 7.42 – 7.37 (m, 4H), 4.51 – 4.49 (m, 4H), 3.89 – 3.87 (m, 4H).

$^{13}\text{C}$  NMR (101 MHz,  $\text{CDCl}_3$ )  $\delta$  166.6, 133.1, 130.1, 129.7, 128.4, 69.3, 64.1.

LCMS ( $\text{ESI}^+$ ): r.t.= 2.7 mins,  $m/z$  = 315.2  $[\text{M}+\text{H}]^+$

### Synthesis of [1,1'-binaphthalene]-2,2'-diyl dibenzoate (7c)

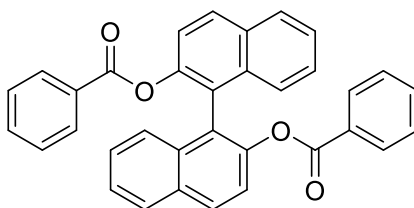

Synthesised according to the general method for esterification from benzoic acid (0.106 g, 0.87 mmol) and [1,1'-Binaphthalene]-2,2'-diol (0.120 g, 0.42 mmol, 0.84 OH equivalent). The crude

material was purified by flash column chromatography (100% hexane to 7.5% EtOAc 92.5% hexane) to give the desired product as a white solid in 72% yield (0.149 g).

Characterisation data was consistent with previously reported literature values.<sup>24</sup>

<sup>1</sup>H NMR (400 MHz, CDCl<sub>3</sub>) δ 8.02 – 7.98 (d, *J* = 8.4, 2H), 7.92 (dt, *J* = 8.2, 0.9, 2H), 7.75 – 7.67 (m, 4H), 7.61 (d, *J* = 8.9, 2H), 7.51 – 7.41 (m, 6H), 7.36 (ddd, *J* = 8.7, 6.6, 1.3, 2H), 7.32 – 7.22 (m, 4H).

<sup>13</sup>C NMR (101 MHz, CDCl<sub>3</sub>) δ 164.8, 147.1, 133.5, 133.3, 131.6, 129.9, 129.7, 129.3, 128.3, 128.1, 126.9, 126.2, 125.8, 123.7, 121.9.

LCMS (ESI<sup>+</sup>) r.t.= 3.7 mins, *m/z* = 495.3 [M+H]<sup>+</sup>

### Synthesis of 4-benzamidophenyl benzoate (7d)

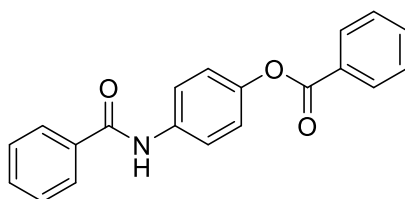

Synthesised according to the general method for esterification from benzoic acid (0.100 g, 0.82 mmol) and 4-aminophenol (0.048 g, 0.44 mmol (0.88 mol equiv.)). During the course of the reaction a white solid precipitated from the reaction mixture. The solid was filtered and then triturated with MeCN (25 mL), hexane (25 mL), ethyl acetate (50 mL) and DCM (50 mL). The solid was allowed to dry and removed from the filter paper to yield a flaky white solid in 31% yield (0.040 g)

<sup>1</sup>H NMR (599 MHz, dmsO) δ 10.38 (s, 1H), 8.16 – 8.14 (m, 2H), 7.99 – 7.97 (m, 2H), 7.88 – 7.86 (m, 2H), 7.76 – 7.74 (m, 1H), 7.63 – 7.59 (m, 3H), 7.54-7.51 (m, 2H), 7.29 – 7.28 (m, 2H).

<sup>13</sup>C NMR (101 MHz, DMSO) δ 165.7, 164.8, 146.3, 137.1, 134.9, 134.1, 131.7, 129.8, 129.1, 129.0, 128.5, 127.7, 122.1, 121.4.

ASAP HRMS (ESI<sup>+</sup>) Calculated for [M+H]<sup>+</sup> C<sub>20</sub>H<sub>16</sub>NO<sub>3</sub> = 318.1130, Found = 318.1108

IR v<sub>max</sub> (ATR)/cm<sup>-1</sup> 3333, 1726, 1653, 1510, 1410, 1314, 1272, 1194, 1065, 703

### Synthesis of S-benzyl benzothioate (9a)

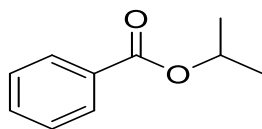

Synthesised according to the general method for thioesterification from benzoic acid (0.103 g, 0.84 mmol) and benzyl mercaptan (0.107 g, 0.86 mmol). The crude material was purified by flash column chromatography (100% hexane to 2.5% EtOAc 97.5% hexane) to give the desired product as a clear oil in 89% yield (0.166 g)

Characterisation data was consistent with previously reported literature values.<sup>25</sup>

<sup>1</sup>H NMR (400 MHz, CDCl<sub>3</sub>) δ 8.06 – 7.98 (m, 2H), 7.58 (m, 1H), 7.51 – 7.40 (m, 4H), 7.39 – 7.24 (m, app 4H, 3H), 4.37 (s, 2H).

<sup>13</sup>C NMR (101 MHz, CDCl<sub>3</sub>) δ 191.3, 137.6, 136.8, 135.3, 129.1, 129.0, 128.9, 128.8, 128.7, 128.6, 128.3, 127.4, 33.4.

LCMS (ESI<sup>+</sup>) r.t. = 3.1 mins, *m/z* = 229.2 [M+H]<sup>+</sup>

### Synthesis of methyl 2-(benzoylthio)acetate (9b)

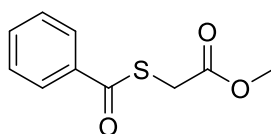

Synthesised according to the general method for thioesterification from benzoic acid (0.107 g, 0.88 mmol) and methyl 2-mercaptoacetate (0.092 g, 0.86 mmol). The crude material was purified by flash column chromatography (100% hexane to 5% EtOAc 95% hexane) to give the desired product as a clear oil in 70% yield (0.126 g).

<sup>1</sup>H NMR (400 MHz, CDCl<sub>3</sub>) δ 7.96– 7.93 (m, 2H), 7.58-7.54 (m, 1H), 7.45 – 7.41 (m, 2H), 3.87 (s, 2H), 3.74 (s, 3H).

<sup>13</sup>C NMR (101 MHz, CDCl<sub>3</sub>) δ 190.1, 169.3, 136.1, 133.9, 128.8, 127.4, 52.9, 31.1.

LCMS (ESI<sup>+</sup>) r.t. = 2.6 mins, *m/z* = 211.16 [M+H]<sup>+</sup>

HRMS – Calc [C<sub>10</sub>H<sub>11</sub>O<sub>3</sub>S] 211.0429, Obtained – [C<sub>10</sub>H<sub>11</sub>O<sub>3</sub>S] 211.0437 [M+H]<sup>+</sup>

### Synthesis of *S*-(2-acetamidoethyl) benzothioate (**9c**)

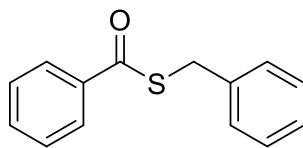

Synthesised according to the general method for esterification from benzoic acid (0.098 g, 0.80 mmol) and *N*-(2-mercaptoethyl)acetamide (0.142 g, 1.20 mmol). The crude material was purified by flash column chromatography (100% hexane to 85% EtOAc 15% hexane) to give the desired product as white solid in 79% yield (0.141 g).

Characterisation data were consistent with previously reported literature values.<sup>26</sup>

<sup>1</sup>H NMR (400 MHz, CDCl<sub>3</sub>) δ 7.95 – 7.90 (m, 2H), 7.58 – 7.52 (m, 1H), 7.45 – 7.40 (m, 2H), 6.36 (s, 1H), 3.49 (q, *J* = 6.3, 2H), 3.19 (t, *J* = 6.5, 2H), 1.94 (s, 3H).

<sup>13</sup>C NMR (101 MHz, CDCl<sub>3</sub>) δ 192.2, 170.6, 136.7, 133.7, 128.7, 127.3, 39.6, 28.6, 23.2.

LCMS (ESI<sup>+</sup>) r.t. = 1.7 mins, *m/z* = 246.2 [M+Na]<sup>+</sup>

### Synthesis of *S*-Phenyl benzothioate (**9d**)

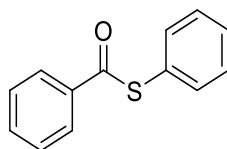

Synthesised according to the general method for thioesterification from benzoic acid (0.100 g, 0.82 mmol) and thiophenol (0.090 g, 0.82 mmol). The crude material was purified using automated column chromatography combiflash (eluted in 100% hexane) to yield the desired product as cream solid in 52% yield (0.091 g).

Characterisation data were consistent with previously reported literature.<sup>27</sup>

<sup>1</sup>H NMR (400 MHz, CDCl<sub>3</sub>) δ 8.08 – 8.04 (m, 2H), 7.64 – 7.60 (m, 1H), 7.57 – 7.45 (m, 7H).

<sup>13</sup>C NMR (101 MHz, CDCl<sub>3</sub>) δ 190.2, 136.7, 135.2, 133.8, 129.6, 129.4, 128.9, 127.6, 127.5.

LCMS (ESI<sup>+</sup>) r.t. = 3.2 mins, *m/z* = 215.4 [M+H]<sup>+</sup>

### Synthesis of S-(tert-butyl) benzothioate (9e)

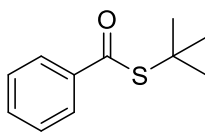

Synthesised according to the general method for thioesterification from benzoic acid (0.099 g, 0.81 mmol) and 2-methylpropane-2-thiol (0.074 g, 0.82 mmol). The crude material was purified using automated column chromatography (eluted in 100% hexane). The fractions were contaminated with ether side product so the fractions were re-purified using manual column chromatography (100% hexane to 90% hexane and 10% EtOAc) to yield the desired product as a colourless oil in 35% yield (0.052 g).

Characterisation data were consistent with previously reported literature values.<sup>28</sup>

<sup>1</sup>H NMR (400 MHz, CDCl<sub>3</sub>) δ 7.95 – 7.89 (m, 2H), 7.56 – 7.48 (m, 1H), 7.45 – 7.37 (m, 2H), 1.58 (s, 9H).

<sup>13</sup>C NMR (101 MHz, CDCl<sub>3</sub>) δ 192.9, 138.3, 132.9, 128.5, 127.0, 48.2, 30.0.

LCMS (ESI<sup>+</sup>) r.t = 3.2 mins, *m/z* 195.2 [M+H]<sup>+</sup>

### Synthesis of S-(tert-butyl) pyridine-2-carbothioate (9f)

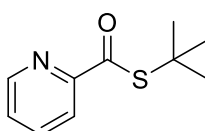

Synthesised according to the general method for thioesterification from 2-picolinic acid (0.100 g, 0.81 mmol) and 2-methylpropane-2-thiol (0.074g, 0.82 mmol). The crude material was purified using automated column chromatography (product eluted in 100% hexane) to yield the desired product as a white solid in 59% yield (0.093 g)

<sup>1</sup>H NMR (400 MHz, CDCl<sub>3</sub>) δ 8.64 (ddd, *J* = 4.8, 1.7, 0.9 Hz, 1H), 7.94 – 7.88 (m, 1H), 7.83 (td, *J* = 7.7, 1.7 Hz, 1H), 7.47 (ddd, *J* = 7.5, 4.8, 1.3 Hz, 1H), 1.57 (s, 9H).

<sup>13</sup>C NMR (151 MHz, cdcl<sub>3</sub>) δ 193.8, 153.3, 149.0, 137.4, 127.6, 120.1, 47.1, 47.1, 29.9.

LCMS (ESI<sup>+</sup>) r.t = 2.5 mins, *m/z* 196.2 [M+H]<sup>+</sup>

HRMS – Calculated [C<sub>10</sub>H<sub>14</sub>NOS] 196.0796, Found [C<sub>10</sub>H<sub>14</sub>NOS] 196.0794

IR

### Synthesis of Octyl Benzothioate (9g)

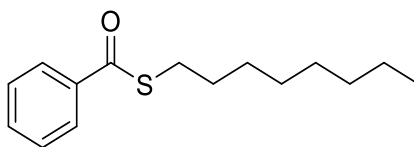

Synthesised according to the general method for thioesterification from (0.100 g, 0.82 mmol) and octanthiol (0.140g, 0.96 mmol). The crude material was purified by flash column chromatography (100% hexane to 5% EtOAc 95% hexane) to give the desired product as a colourless oil in 40% yield (0.081g).

Characterisation data was consistent with previously reported literature.<sup>27</sup>

<sup>1</sup>H NMR (400 MHz, CDCl<sub>3</sub>) δ 7.99 – 7.96 (m, 2H), 7.55 – 7.53 (m, 1H), 7.45 – 7.41 (m, 2H), 3.09 – 3.05 (m, 2H), 1.69 – 1.63 (m, 2H), 1.44 – 1.27 (m, 9H), 0.90 – 0.87 (m, 3H).

<sup>13</sup>C NMR (101 MHz, CDCl<sub>3</sub>) δ 192.2, 137.4, 133.3, 128.6, 127.3, 31.9, 29.7, 29.3, 29.2, 29.2, 29.1, 22.8, 14.2.

LCMS (ESI<sup>+</sup>) r.t. = 4.2 mins, *m/z* = 251.3 [M+H]<sup>+</sup>

### Synthesis of S-benzyl 4-methoxybenzothioate (9h)

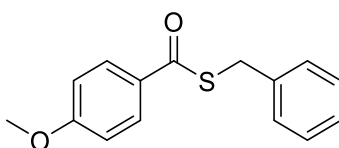

Synthesised according to the general method for thioesterification from 4-methoxybenzoic acid (0.099 g, 0.65 mmol) and benzyl mercaptan (0.089 g, 0.72 mmol). The crude material was purified using automated flash column chromatography combiflash (product eluted in 100% hexane) to yield the desired product as a white solid in 49% (0.083 g).

Characterisation data were consistent with previously reported literature values.<sup>29</sup>

$^1\text{H}$  NMR (400 MHz,  $\text{CDCl}_3$ )  $\delta$  8.01 – 7.97 (m, 2H), 7.43 – 7.40 (m, 2H), 7.37 – 7.33 (m, 2H), 7.31 – 7.27 (m, 1H), 6.97 – 6.93 (m, 2H), 4.34 (s, 2H), 3.88 (s, 3H).

$^{13}\text{C}$  NMR (101 MHz,  $\text{CDCl}_3$ )  $\delta$  189.8, 163.9, 137.8, 129.7, 129.6, 129.1, 128.7, 127.3, 113.9, 55.6, 33.3.

GCMS ( $\text{EI}^+$ ) r.t = 5.8 mins,  $m/z$  = 258.2 [ $\text{M}$ ] $^+$

### Synthesis of S-benzyl 2-(6-methoxynaphthalen-2-yl)propanethioate (9i)

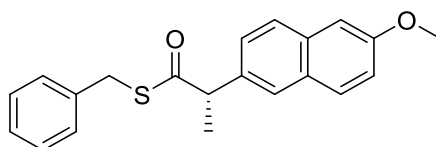

Synthesised according to the general method for thioesterification from Naproxen (0.100 g, 0.43 mmol) and benzyl mercaptan (0.054 g, 0.43 mmol). The crude material was purified using automated column chromatography (100% hexanes 5.5 mins, gradient to 10% EtOAc 90% hexane 0.5 mins, 10% EtOAc 90% hexane 2 mins followed by gradient to 50/50 EtOAc/hexane) to yield the desired product as a colourless oil in 68% yield (0.100 g)

$^1\text{H}$  NMR (599 MHz,  $\text{CDCl}_3$ )  $\delta$  7.77 – 7.72 (m, 3H), 7.46 (dd,  $J$  = 8.5, 1.9, 1H), 7.32 – 7.25 (m, 5H), 7.21-7.16 (m, 2H), 4.19 – 4.05 (m, 3H), 3.95 (s, 3H), 1.68 (d,  $J$  = 7.1, 3H).

$^{13}\text{C}$  NMR (151 MHz,  $\text{CDCl}_3$ )  $\delta$  200.8, 157.9, 137.5, 134.9, 134.0, 129.5, 129.0, 128.9, 128.7, 127.3, 127.3, 126.8, 126.5, 119.2, 105.7, 55.4, 54.1, 33.6, 18.5.

LCMS ( $\text{ESI}^+$ ) r.t = 3.5 mins,  $m/z$  = 337.3 [ $\text{M}+\text{H}$ ] $^+$

HRMS – Calculated [ $\text{C}_{21}\text{H}_{21}\text{O}_2\text{S}$ ] 337.1262, Found [ $\text{C}_{21}\text{H}_{21}\text{O}_2\text{S}$ ] 337.1272 [ $\text{M}+\text{H}$ ] $^+$

IR  $\nu_{\text{max}}$  (ATR)/ $\text{cm}^{-1}$  3029, 2938, 1677, 1601, 1268, 1229, 1029, 944, 854, 818, 750, 698

### Synthesis of S,S'-(ethane-1,2-diyl) dibenzothioate (9j)

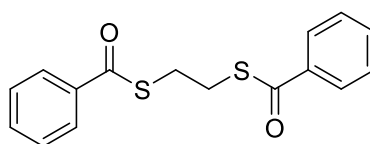

Synthesised according to the general method for thioesterification from benzoic acid (0.100 g, 0.82 mmol) and ethandithiol (0.35 mL, 0.41 mmol, 0.82 SH equivalent). The crude material



was purified using automated column chromatography (product eluted in 100% hexane) to give the desired product as a cream solid in 37% yield (0.046 g).

Characterisation data were consistent with previously reported literature values.<sup>30</sup>

<sup>1</sup>H NMR (400 MHz, CDCl<sub>3</sub>) δ 8.01 – 7.95 (m, 4H), 7.62 – 7.55 (m, 2H), 7.50 – 7.41 (m, 4H), 3.36 (s, 4H).

<sup>13</sup>C NMR (101 MHz, CDCl<sub>3</sub>) δ 191.4, 136.8, 133.7, 128.8, 127.4, 29.0.

LCMS (ESI<sup>+</sup>) r.t = 3.6 mins, *m/z* = 303.2 [M+H]<sup>+</sup>

## Acyl Fluoride Reaction Monitoring

To an oven dried vial was added carboxylic acid (1 equiv.), DIPEA (2 equiv.), PFP (1.1 equiv.), fluorobenzene (1 equiv.) and CD<sub>3</sub>CN (0.6 mL). The contents were then transferred from the vial to a clean, dry NMR tube stoppered with a lid.

For rt analysis the NMR tubes were placed into the NMR instrument autosampler and left there for the duration of the experiment.

For reactions conducted above rt the NMR tubes were transferred to a thermostatically controlled water bath set at 50 °C, the tubes were removed after 1 h and an NMR spectrum recorded. When the acquisition was complete the tube was retrieved and placed back into the water bath.

The time points recorded equates to the amount of time the sample was held in the water bath.

NMR spectra were analysed by direct integration to the resonance corresponding to the acyl fluoride compared to the integration value of the internal standard.

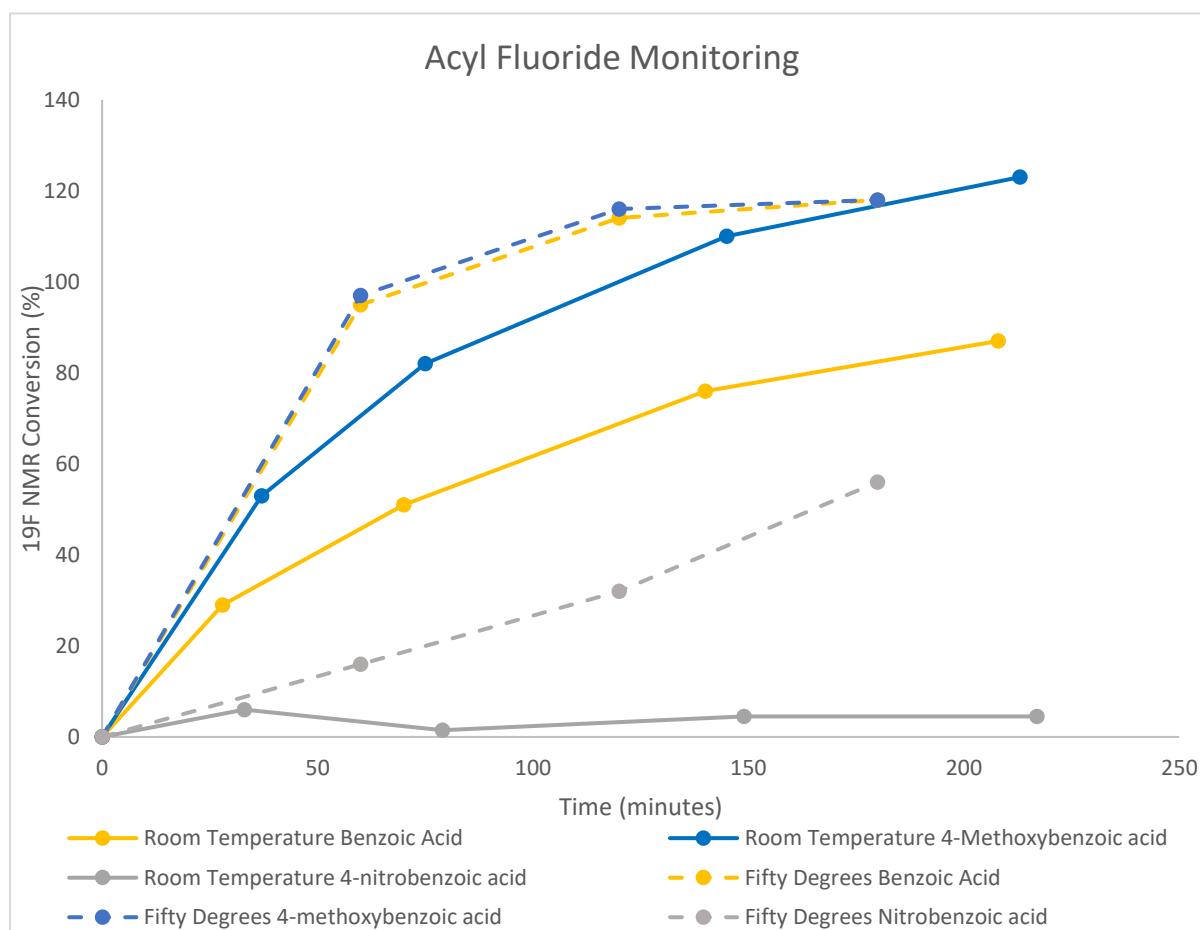

### **Raw data for acyl fluoride monitoring at room temperature**

| Benzoic Acid |         | 4-methoxybenzoic acid |         | 4-nitrobenzoic acid* |         |
|--------------|---------|-----------------------|---------|----------------------|---------|
| mins         | Area AF | mins                  | Area AF | mins                 | Area AF |
| 0            | 0       | 0                     | 0       | 0                    | 0       |
| 28           | 0.29    | 37                    | 0.53    | 33                   | 0.06    |
| 70           | 0.51    | 75                    | 0.82    | 79                   | 0.015   |
| 140          | 0.76    | 145                   | 1.1     | 149                  | 0.045   |
| 208          | 0.87    | 213                   | 1.23    | 217                  | 0.045   |
|              |         |                       |         |                      |         |
|              |         |                       |         |                      |         |

\*A 1.5 equiv of fluorobenzene was added, areas of acyl fluorides were multiplied by 1.5 to accommodate.

### **Raw data for acyl fluoride monitoring 50 °C**

| Benzoic Acid |         | 4-methoxybenzoic acid |         | 4-nitrobenzoic acid |         |
|--------------|---------|-----------------------|---------|---------------------|---------|
| Mins**       | Area AF | Mins**                | Area AF | Mins**              | Area AF |
| 0            | 0       | 0                     | 0       | 0                   | 0       |
| 60           | 0.95    | 60                    | 0.97    | 60                  | 0.16    |
| 120          | 1.14    | 120                   | 1.16    | 120                 | 0.32    |
| 180          | 1.18    | 180                   | 1.18    | 180                 | 0.56    |

\*\*Minutes spent in the water bath

The areas in excess of the expected 1:1 ratio is attributed to different relaxation times. It was not feasible to employ a longer relaxation time on the NMR spectrometers used for this analysis. The relaxation time used was 2.77 seconds.

## NMR Data for Synthesised Compounds

28144808.10.fid

SLC:LNB:LB-001-35D-PURIFY

Proton.dur CDCl3 /home/nmr/local/data/28144808.10

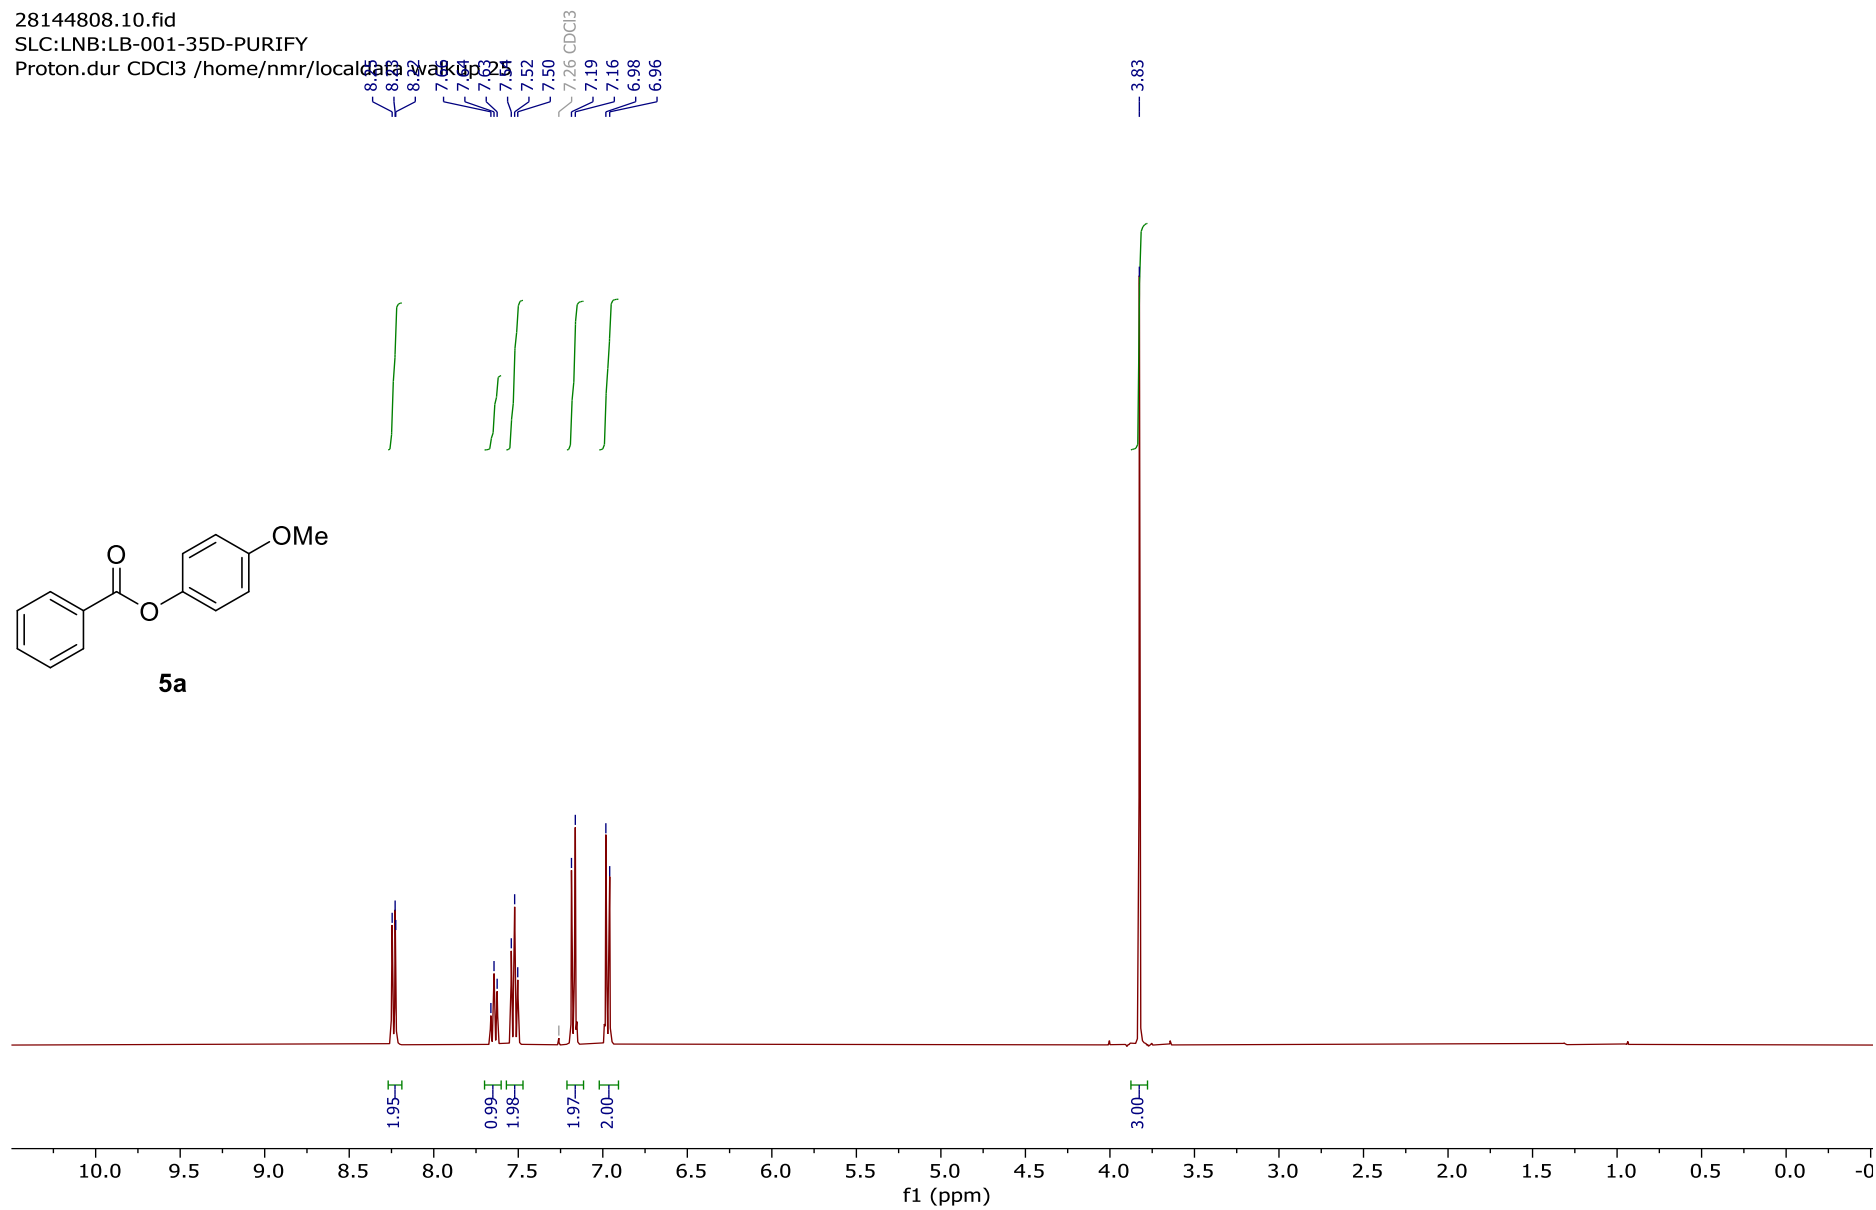

28144808.14.fid  
SLC:LNB:LB-001-35D-PURIFY  
Carbon\_10min.dur CDCl3 /home/nmr/local/data/valkup 25

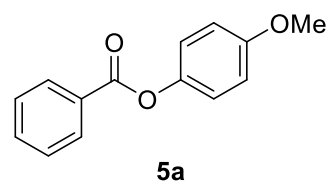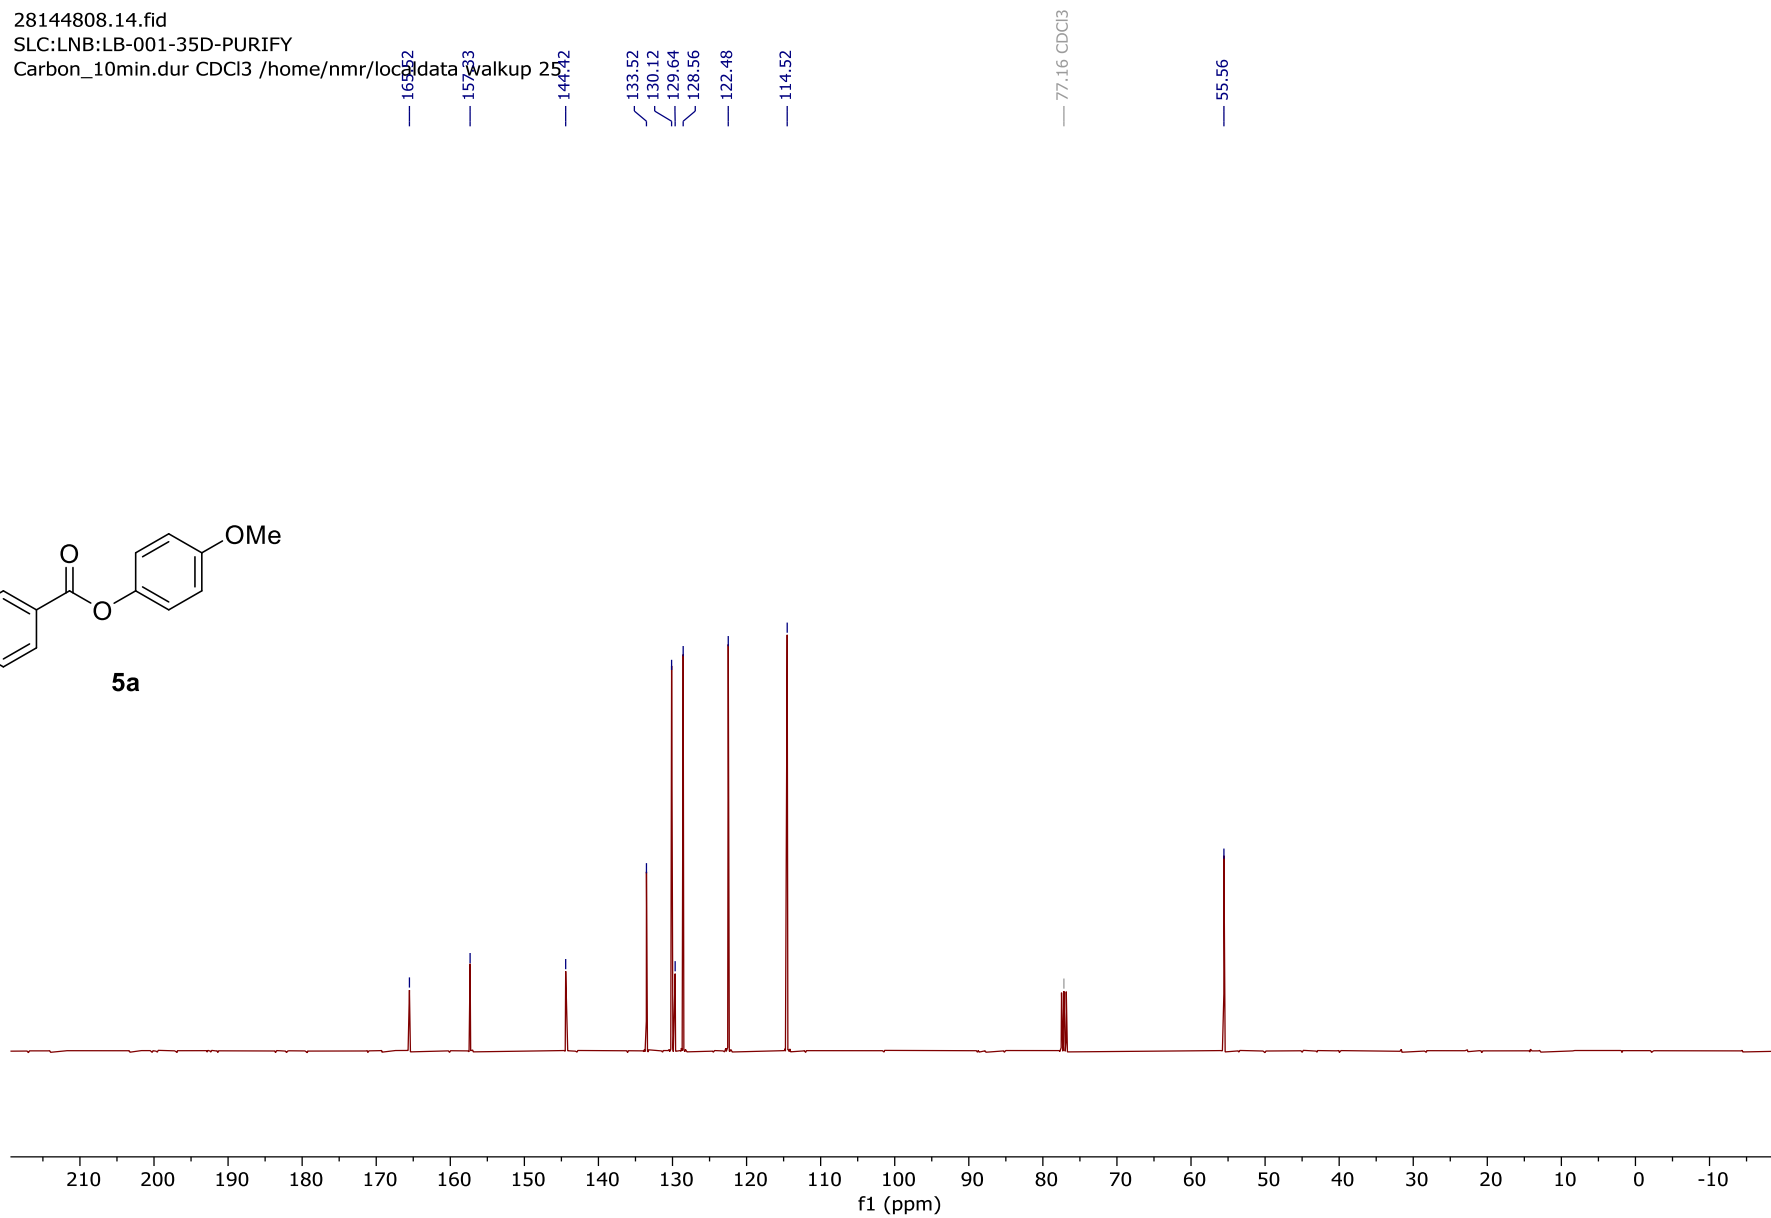

23170456.10.1.1r  
SLC:LNB:LB-001-77-PURIFY  
Proton1.icon CDCl3 /home

8.168  
8.166  
8.164  
8.162  
8.160  
8.158  
8.156  
8.154  
8.152  
8.150  
8.148  
8.146  
8.144  
8.142  
8.140  
8.138  
8.136  
8.134  
8.132  
8.130  
8.128  
8.126  
8.124  
8.122  
8.120  
8.118  
8.116  
8.114  
8.112  
8.110  
8.108  
8.106  
8.104  
8.102  
8.100  
8.098  
8.096  
8.094  
8.092  
8.090  
8.088  
8.086  
8.084  
8.082  
8.080  
8.078  
8.076  
8.074  
8.072  
8.070  
8.068  
8.066  
8.064  
8.062  
8.060  
8.058  
8.056  
8.054  
8.052  
8.050  
8.048  
8.046  
8.044  
8.042  
8.040  
8.038  
8.036  
8.034  
8.032  
8.030  
8.028  
8.026  
8.024  
8.022  
8.020  
8.018  
8.016  
8.014  
8.012  
8.010  
8.008  
8.006  
8.004  
8.002  
8.000  
7.754  
7.752  
7.750  
7.748  
7.746  
7.744  
7.742  
7.740  
7.738  
7.736  
7.734  
7.732  
7.730  
7.728  
7.726  
7.724  
7.722  
7.720  
7.718  
7.716  
7.714  
7.712  
7.710  
7.708  
7.706  
7.704  
7.702  
7.700  
7.726  
5.29  
5.27  
5.26  
5.24  
5.23

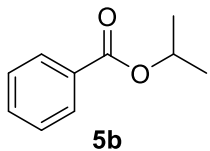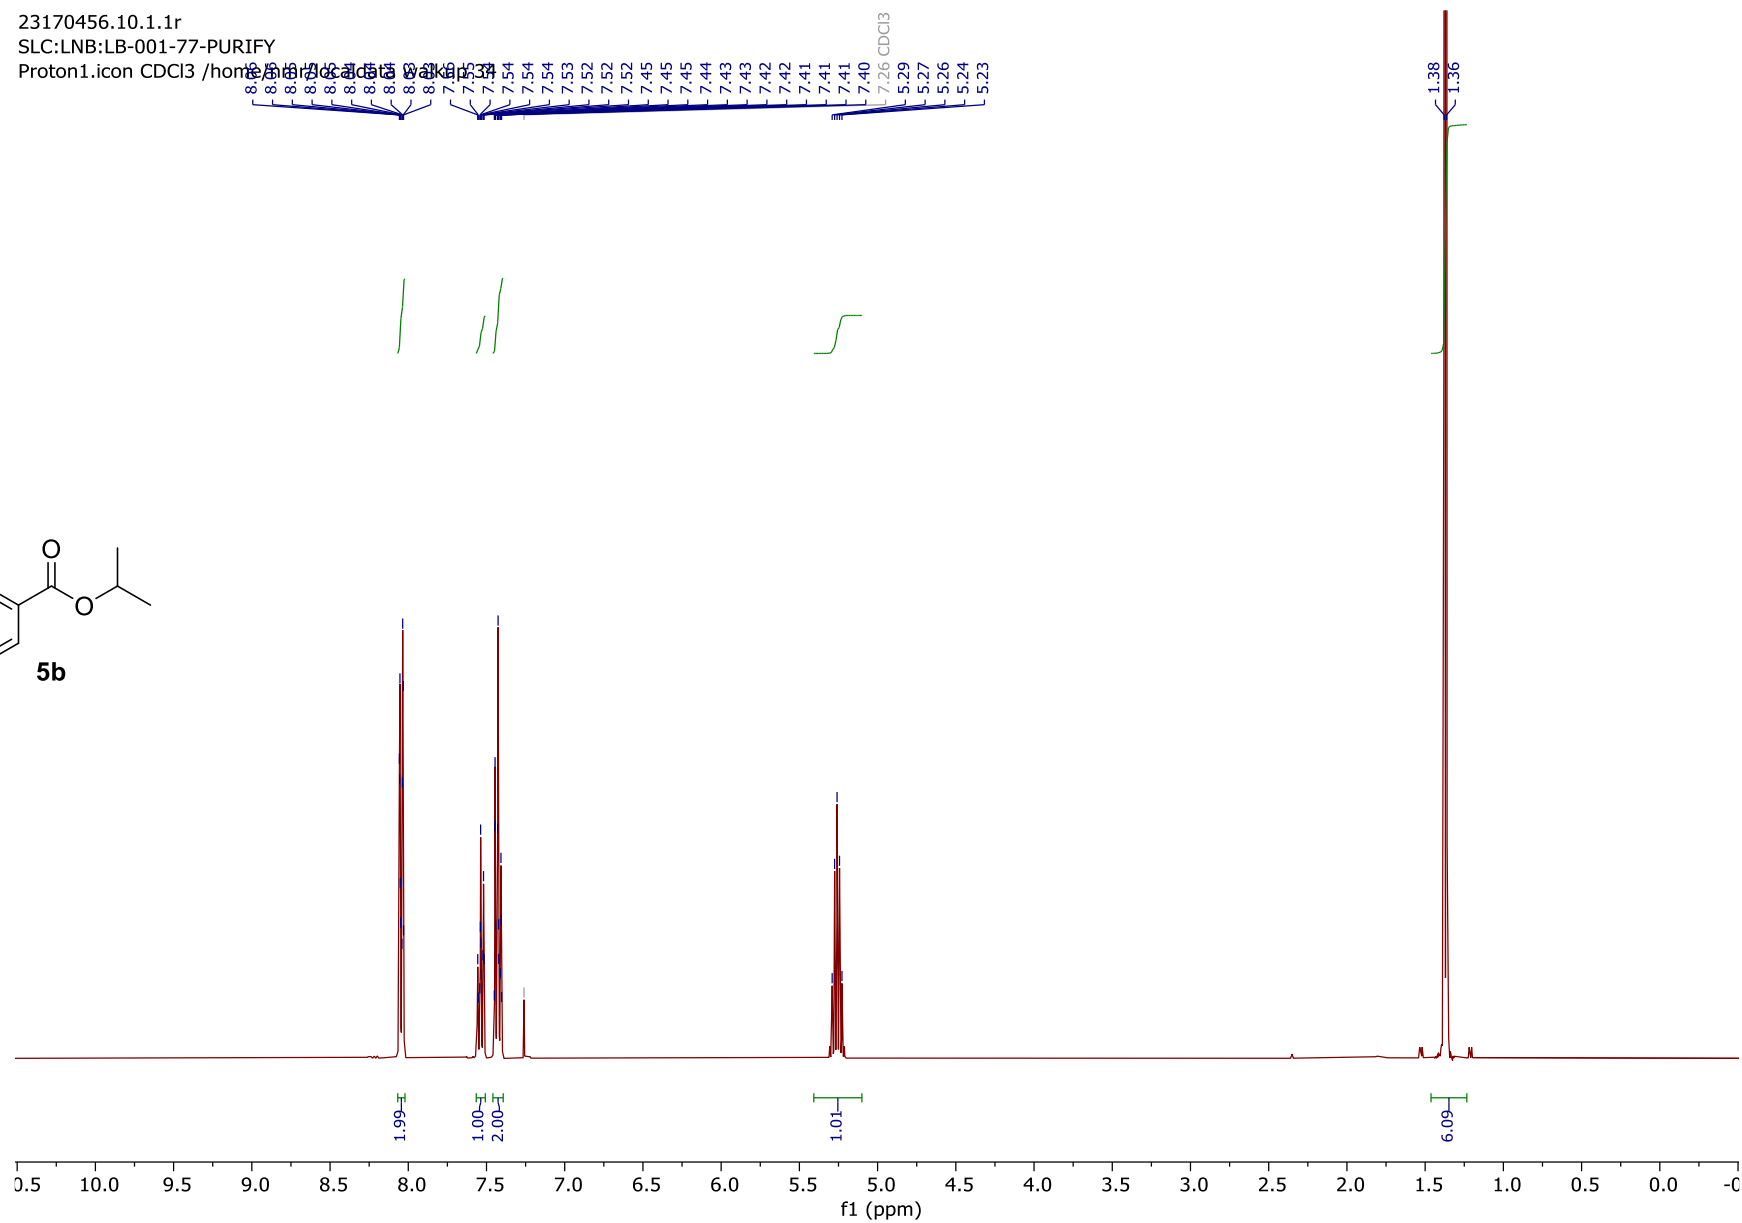

23170456.11.1.1r  
SLC:LNB:LB-001-77-PURIFY  
Carbon.dur CDCl3 /home/nmr/localdata/backup 34

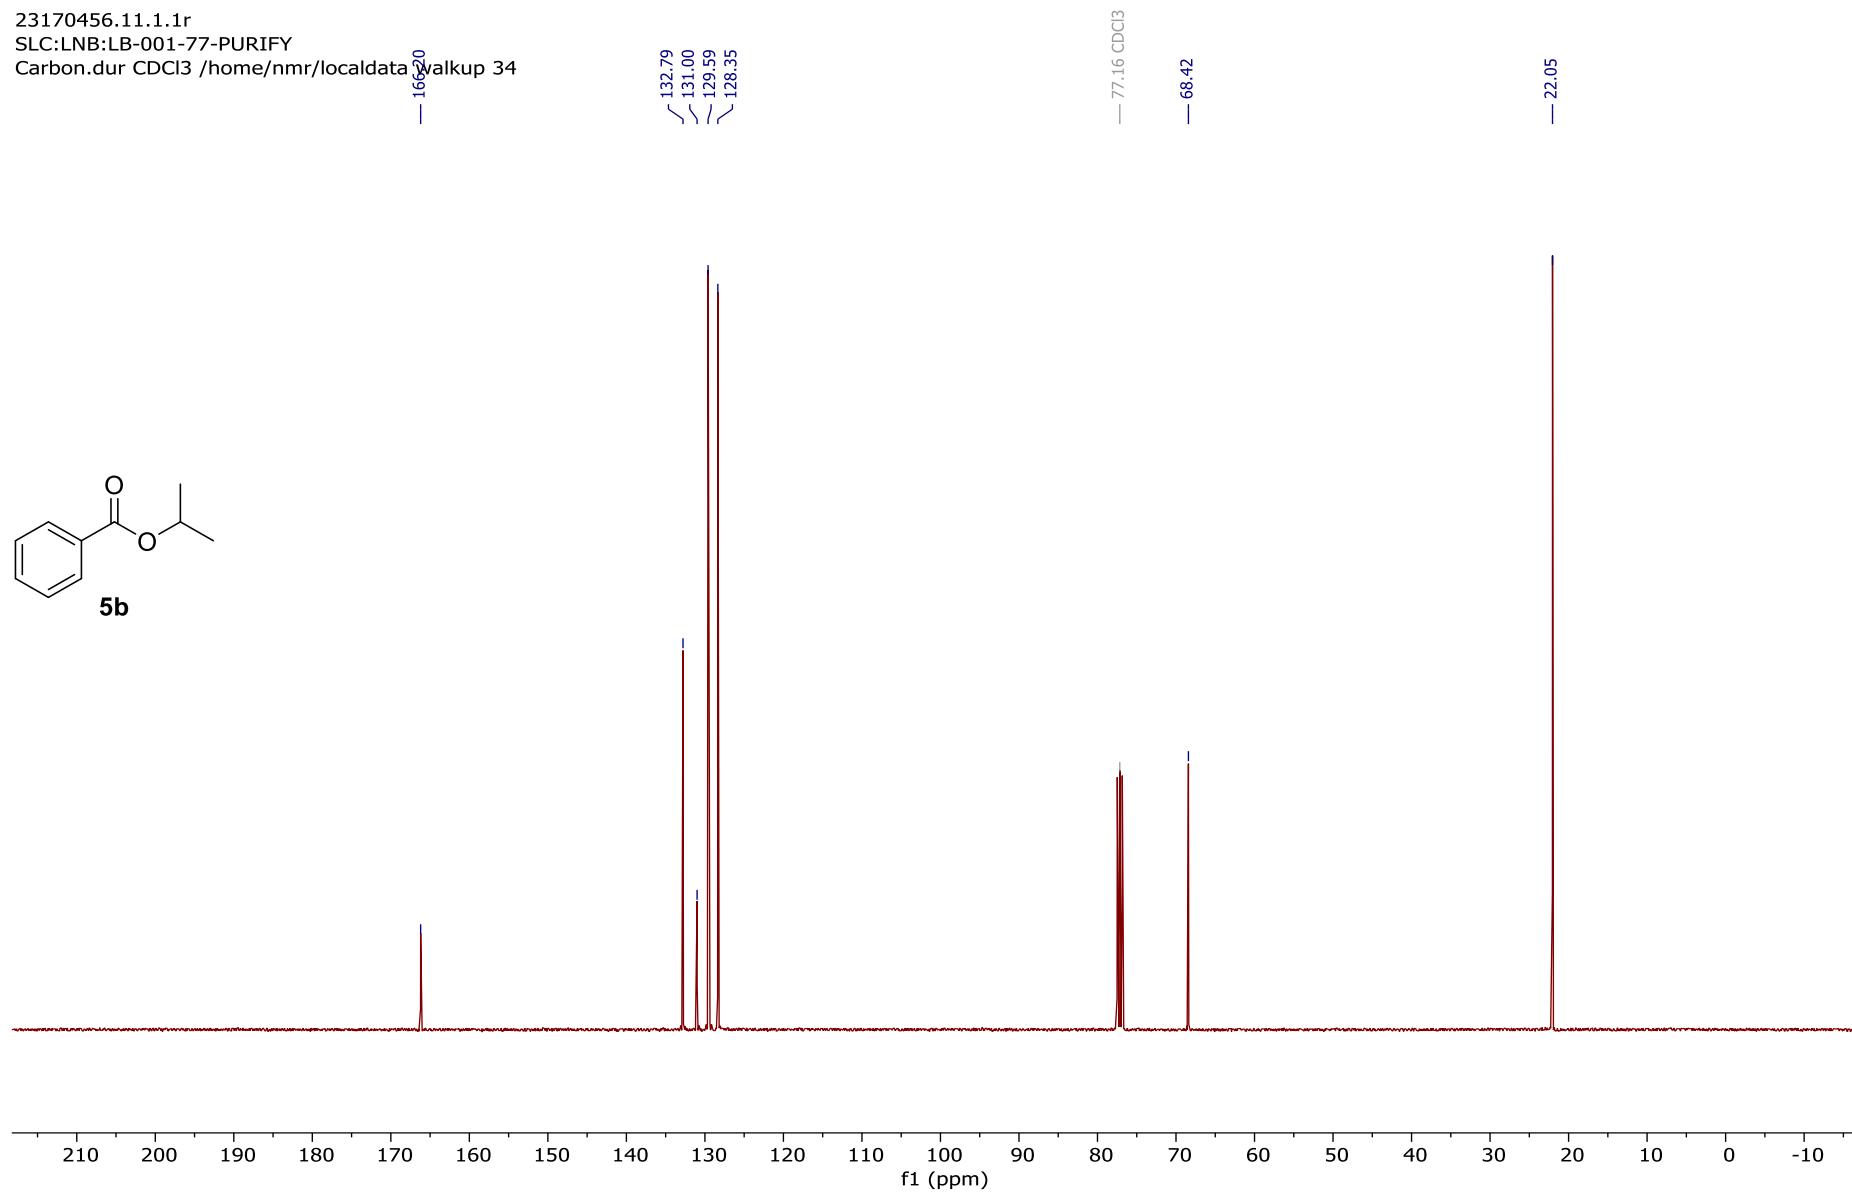



04164538.10.1.1r  
SLC:LNB:LB-001-40 PURIP  
Proton.dur CDCl3 /home/nmr/localdata/walkup/15

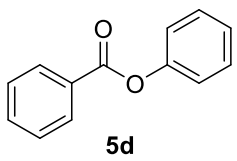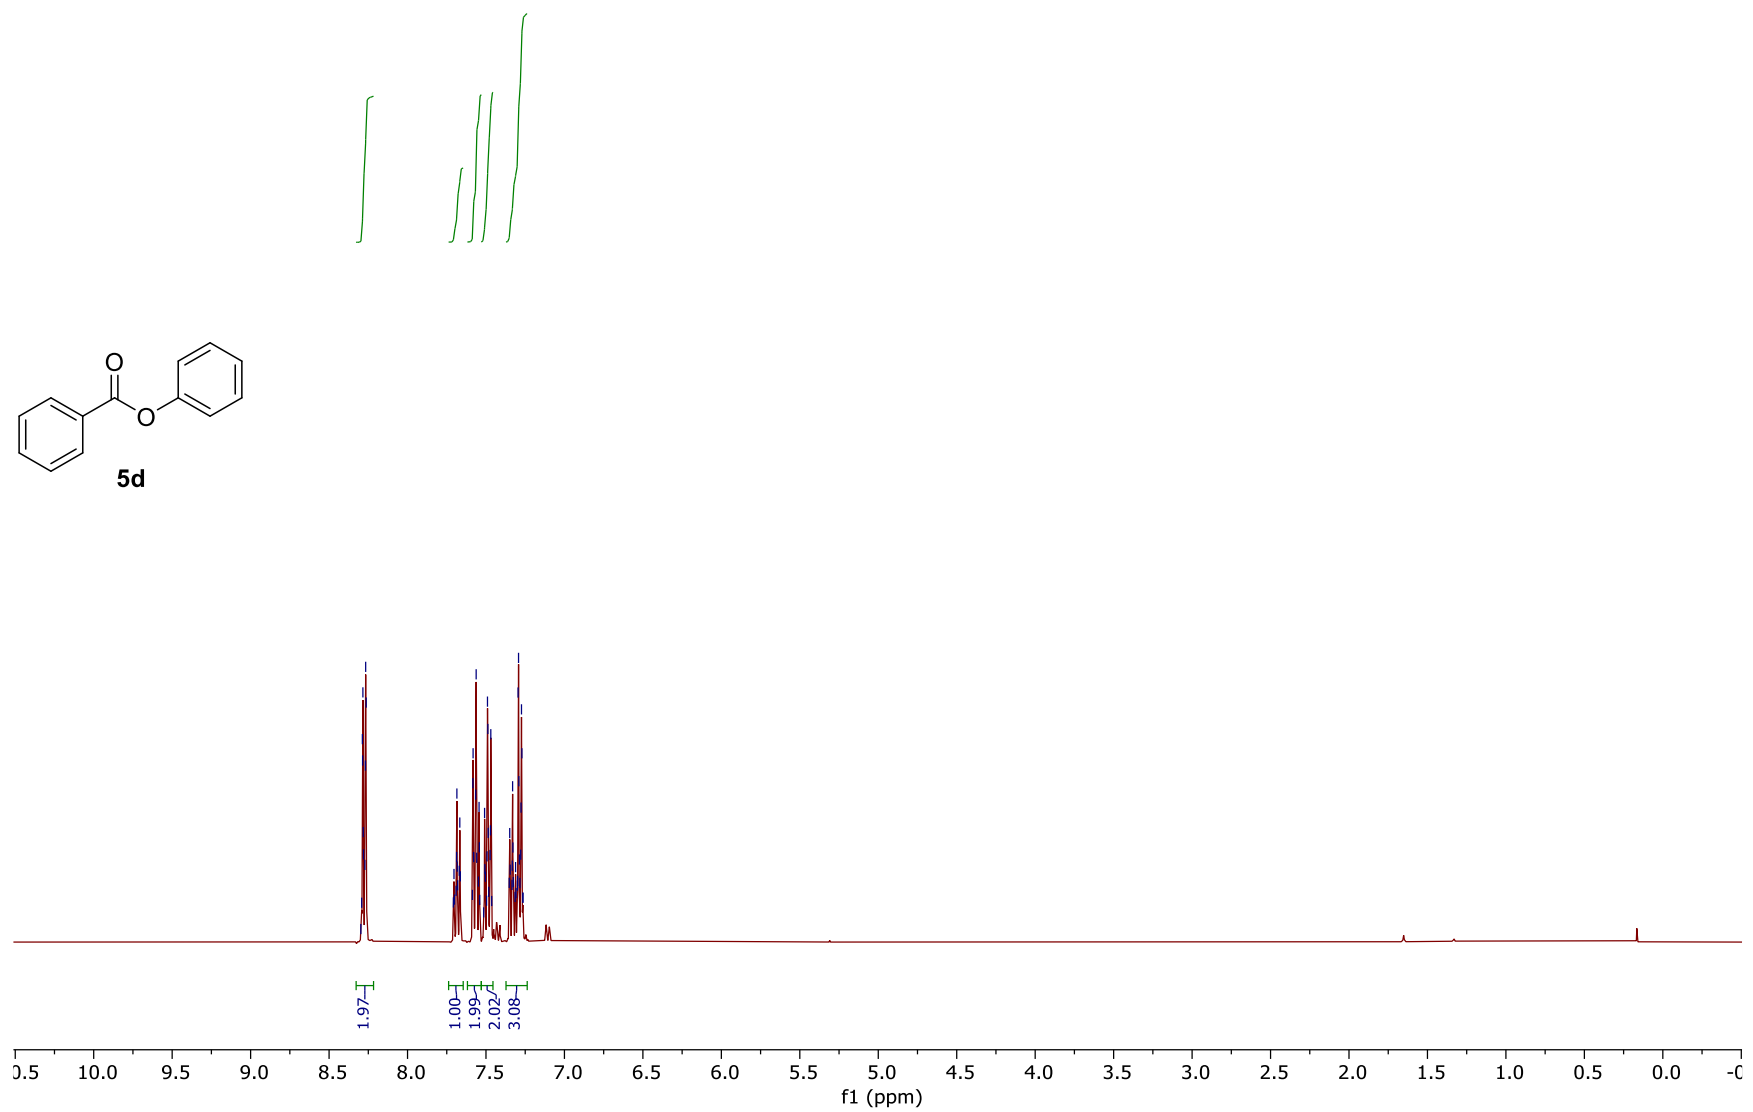

04164538.14.1.1r  
SLC:LNB:LB-001-40-PURIFY  
Carbon.dur CDCl3 /home/nmr/localdata/walkup 15

166.56

151.05

133.67  
130.25  
130.21  
130.13  
129.66  
129.58  
128.66  
125.98  
121.82

77.16 CDCl3

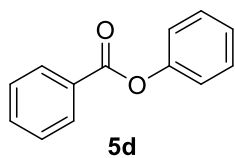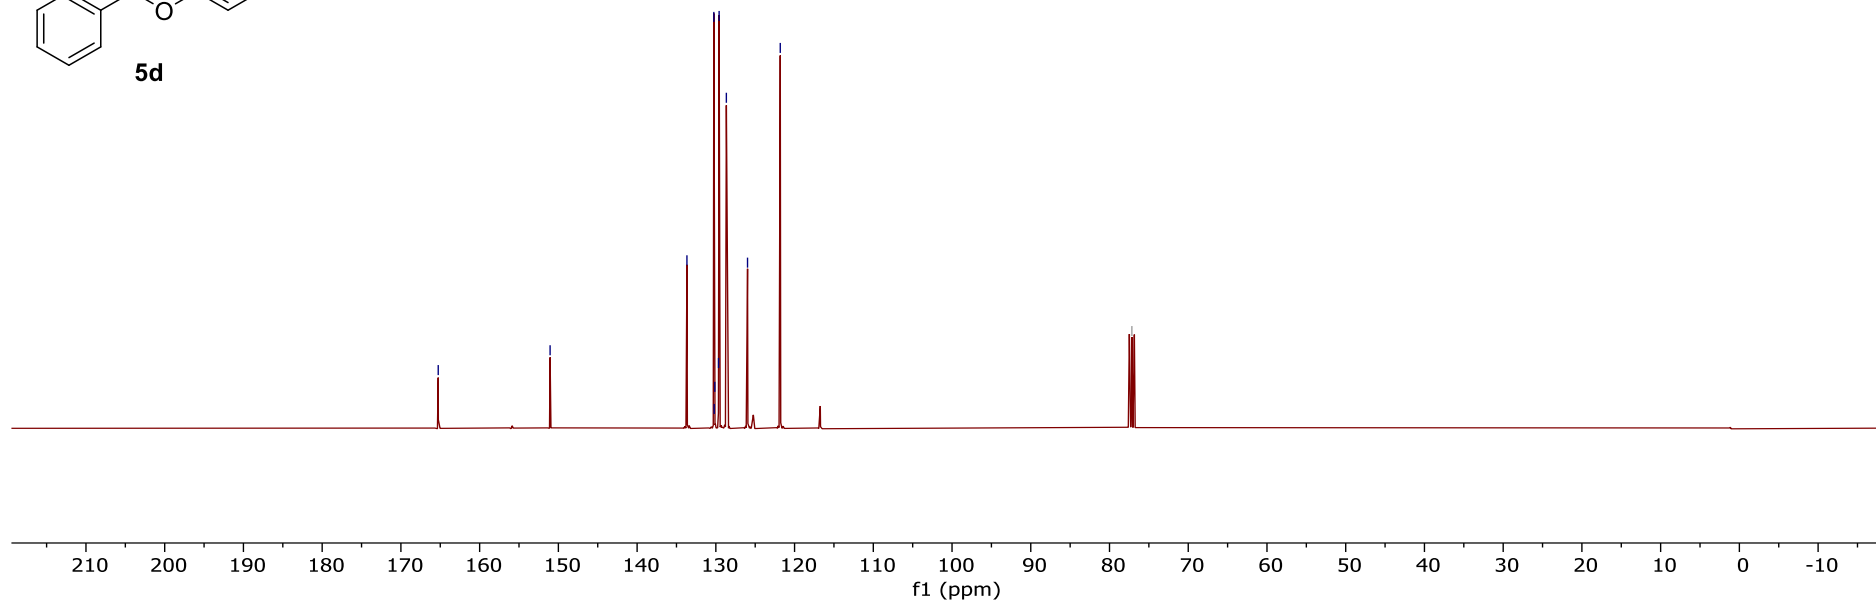

23165205.10.1.1r  
SLC:LNB:LNB-001-45B-PURIFY  
Proton1.icon CDCl3 /home/lnr/totaldata/Workup

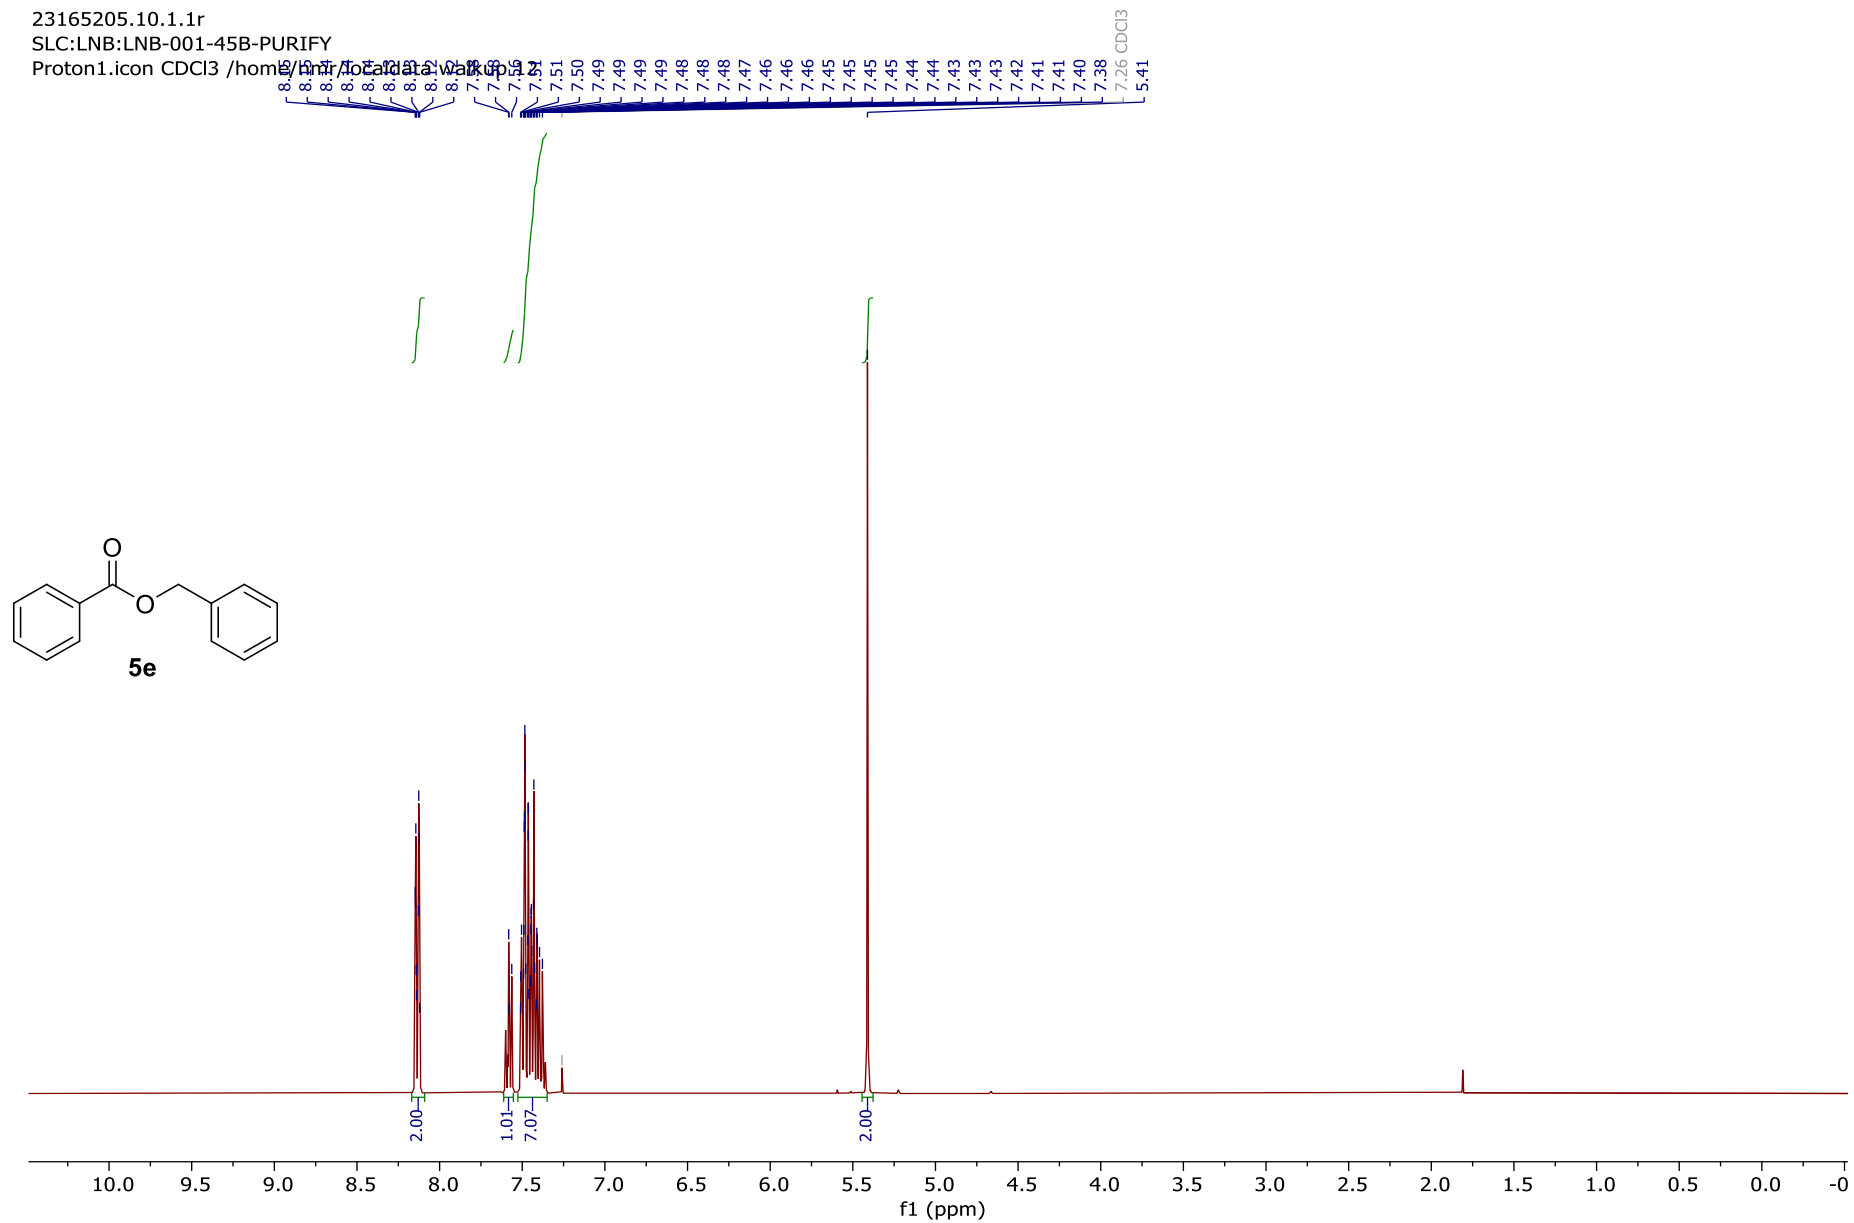

23165205.11.fid  
SLC:LNB:LNB-001-45B-PURIFY  
Carbon.dur CDCl3 /home/nmr/localdata/walkup 12

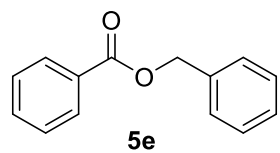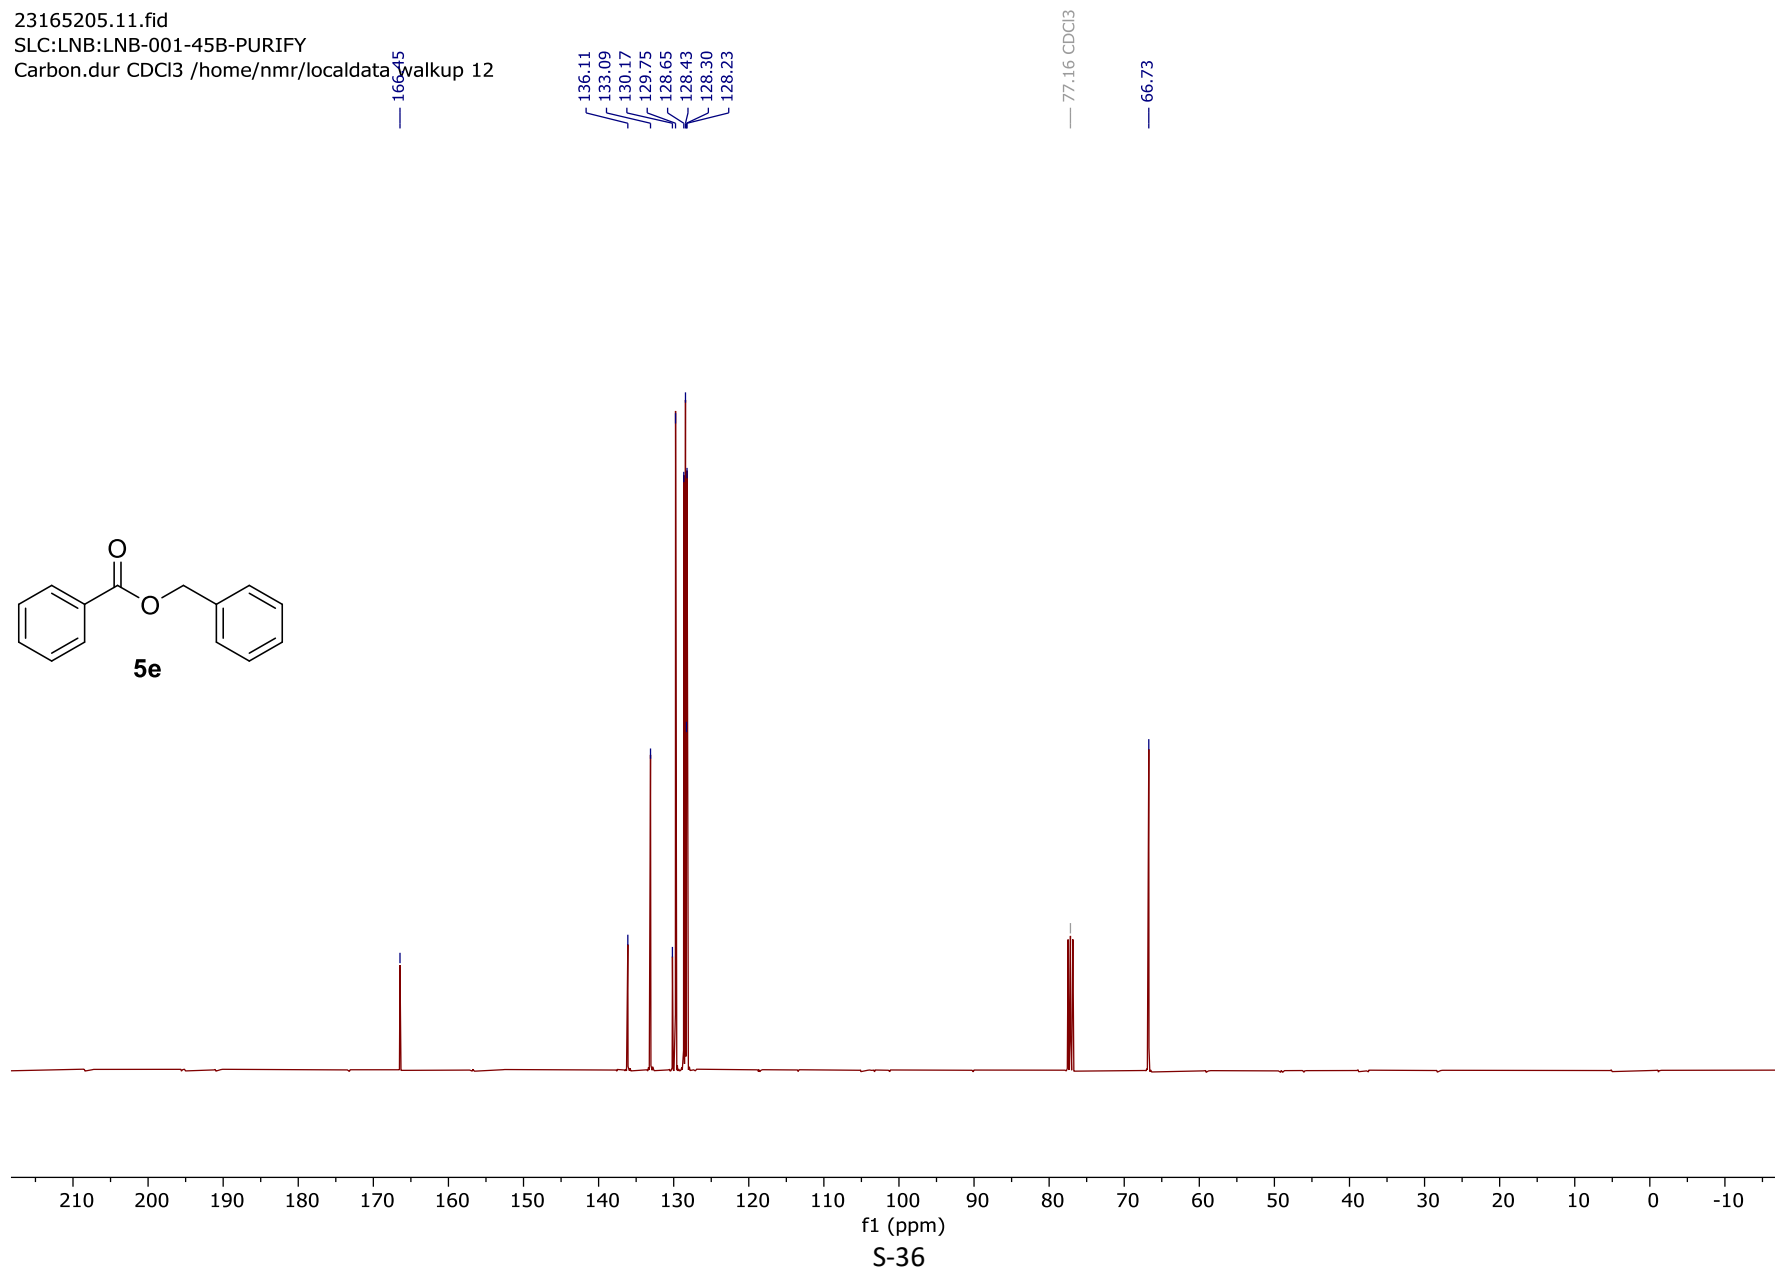

08155012.10.1.1r  
SLC:LNB:LB-001-56-PURIFY  
Proton1.icon CDCl3 /home/ana/08155012

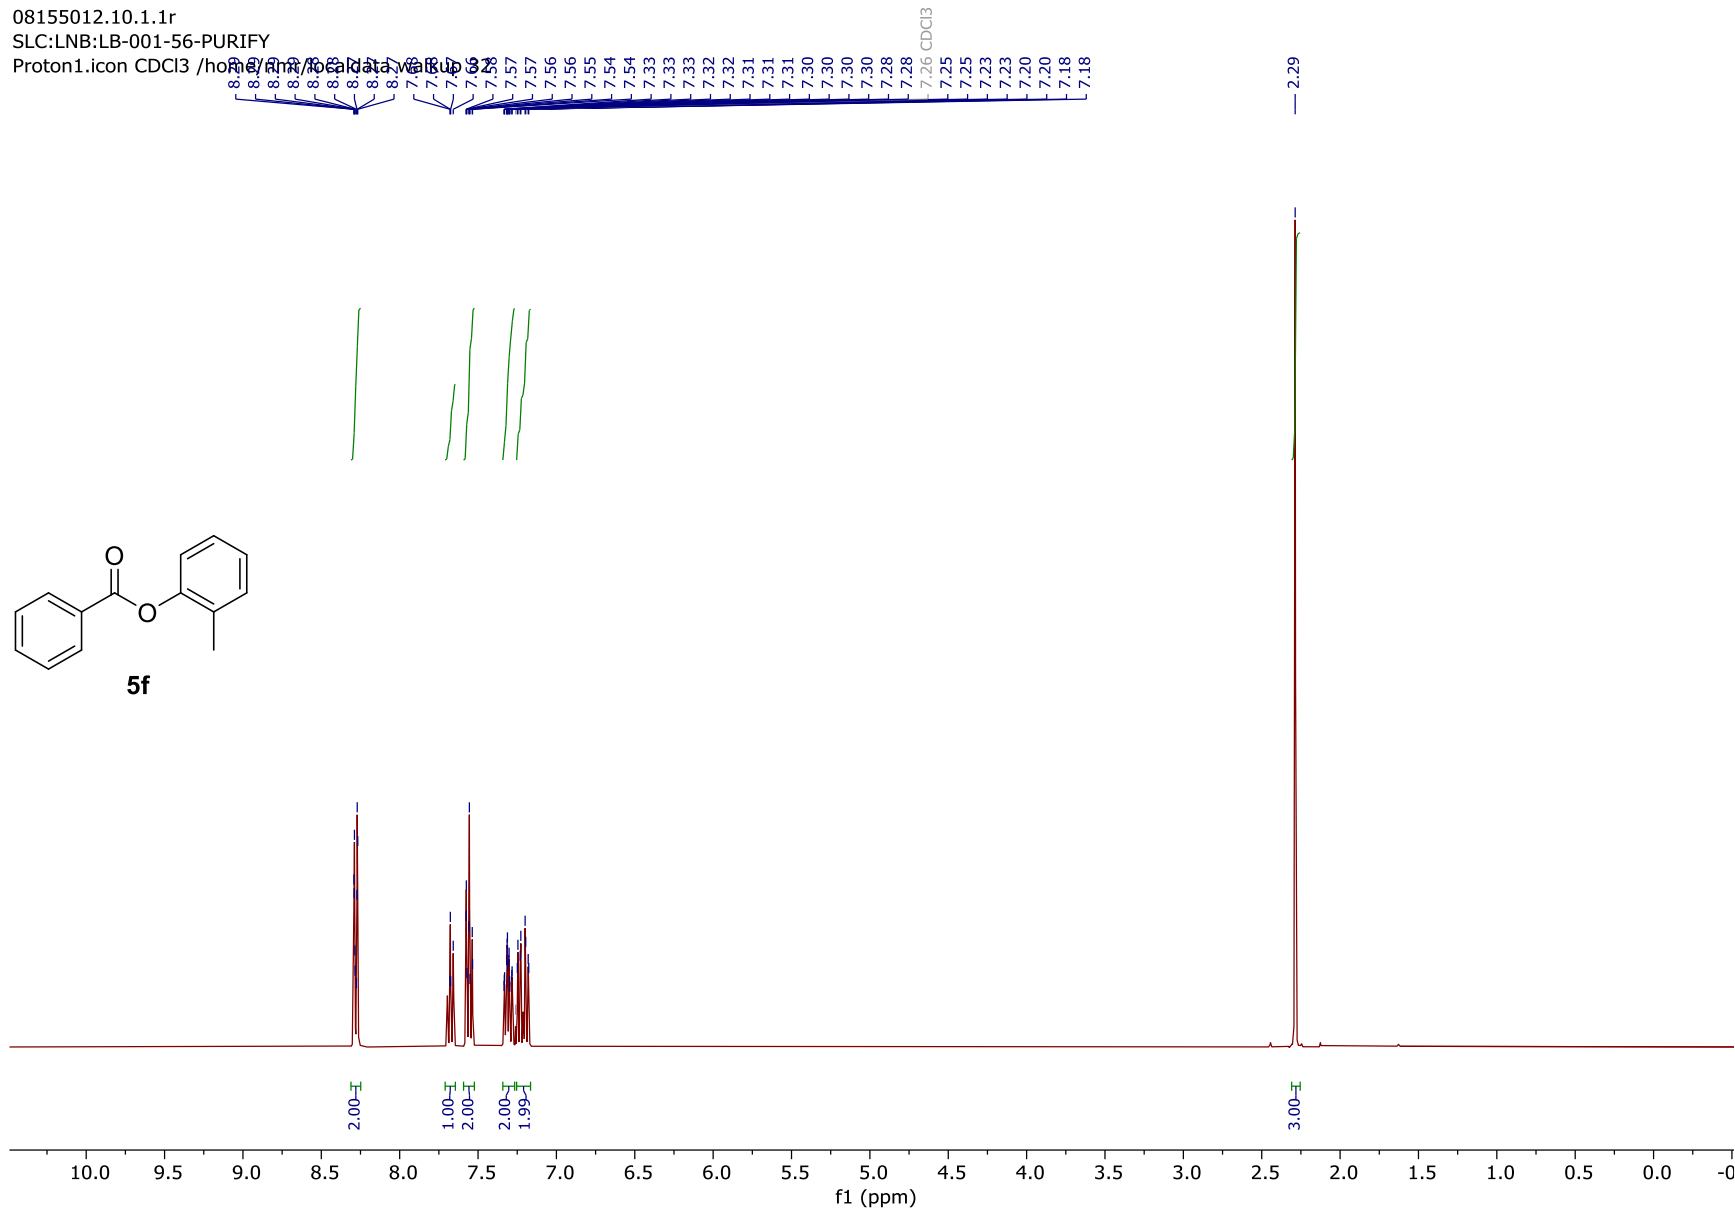

08155012.11.1.1r  
SLC:LNB:LB-001-56-PURIFY  
Carbon.dur CDCl3 /home/nmr/localdata/walkup 32

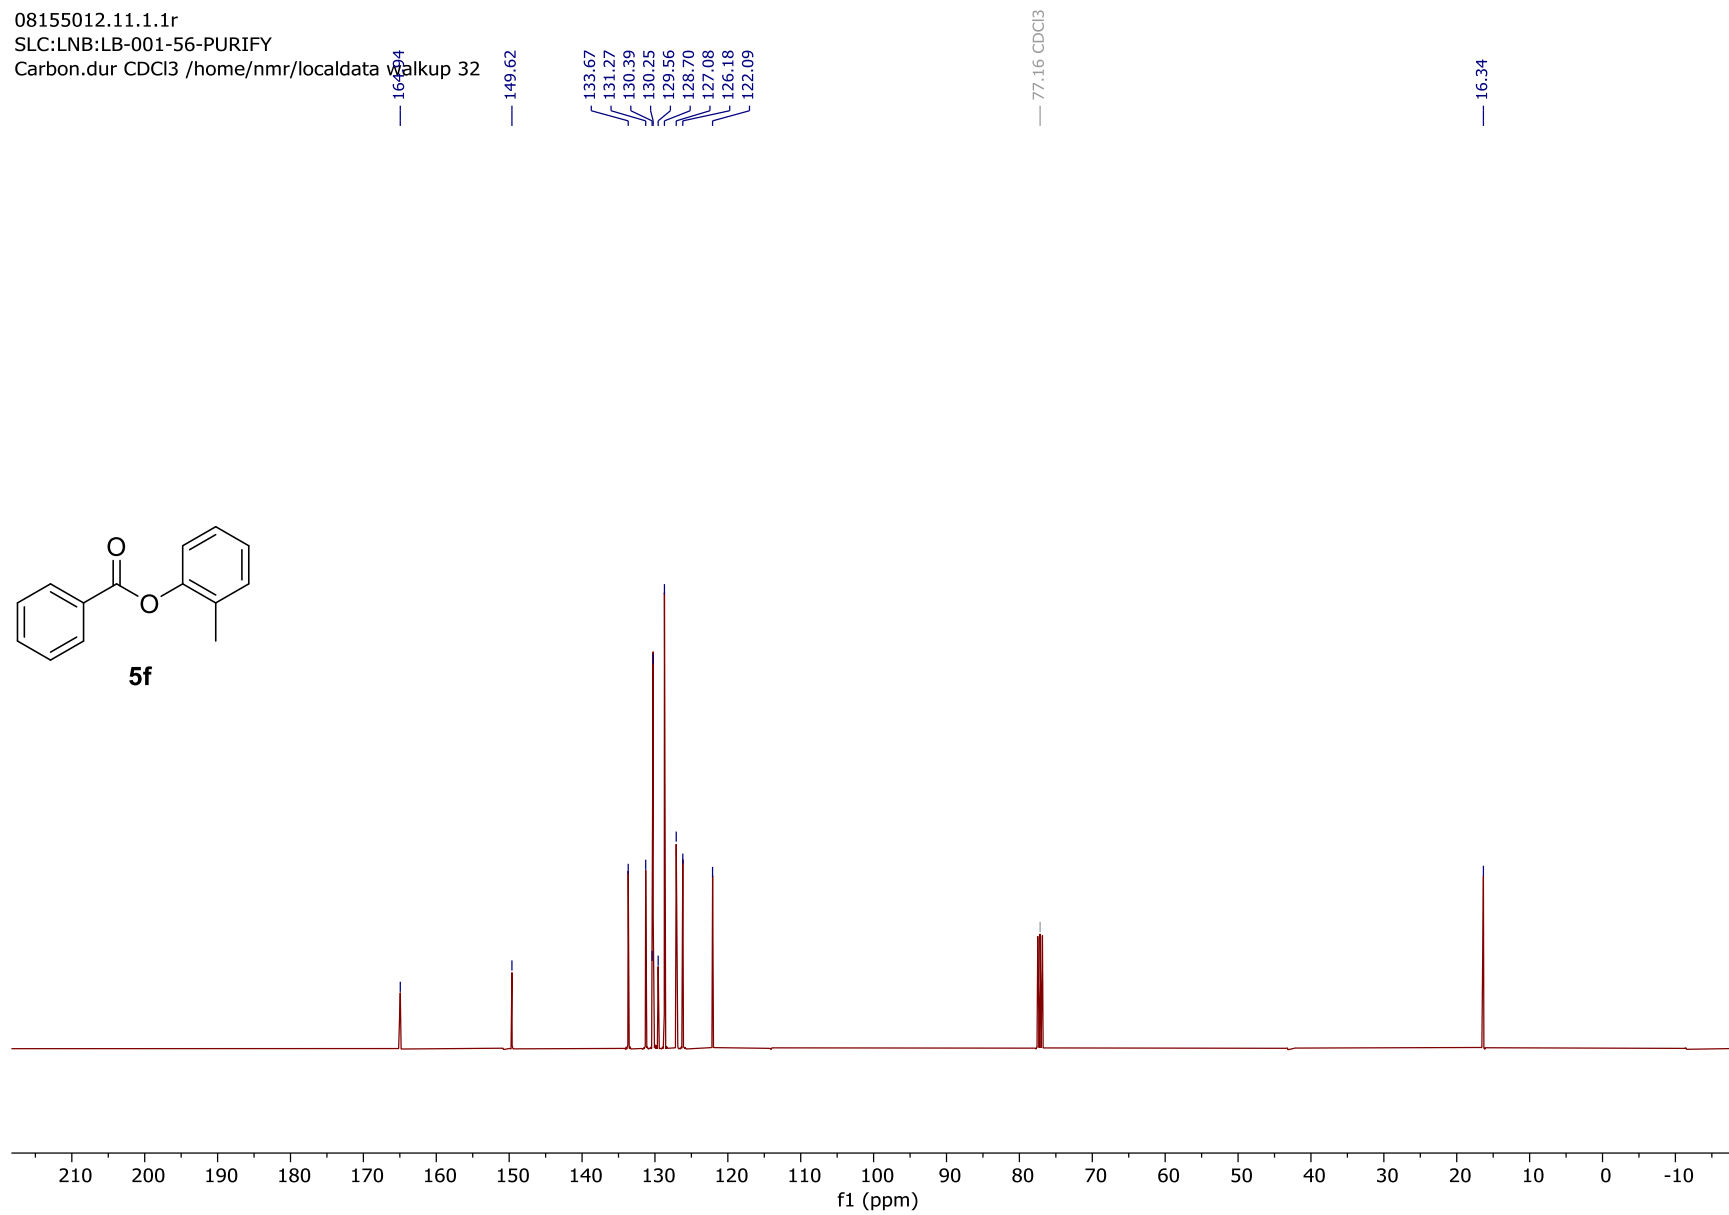

18162932.10.1.1r

SLC:LNB:LB-001-45A-PURIFY

Proton1 in CDCl3 Phenyl Nitro Data

- 8.26
- 8.25
- 8.24
- 8.23
- 8.22
- 8.21
- 8.20
- 8.19
- 8.18
- 8.17
- 8.16
- 8.15
- 8.14
- 8.13
- 8.12
- 8.11
- 8.10
- 8.09
- 8.08
- 8.07
- 8.06
- 8.05
- 8.04
- 8.03
- 8.02
- 8.01
- 8.00
- 7.99
- 7.98
- 7.97
- 7.96
- 7.95
- 7.94
- 7.93
- 7.92
- 7.91
- 7.90
- 7.89
- 7.88
- 7.87
- 7.86
- 7.85
- 7.84
- 7.83
- 7.82
- 7.81
- 7.80
- 7.79
- 7.78
- 7.77
- 7.76
- 7.75
- 7.74
- 7.73
- 7.72
- 7.71
- 7.70
- 7.69
- 7.68
- 7.67
- 7.66
- 7.65
- 7.64
- 7.63
- 7.62
- 7.61
- 7.60
- 7.59
- 7.58
- 7.57
- 7.56
- 7.55
- 7.54
- 7.53
- 7.52
- 7.51
- 7.50
- 7.49
- 7.48
- 7.47
- 7.46
- 7.45
- 7.44
- 7.43
- 7.42
- 7.41
- 7.40
- 7.39
- 7.38
- 7.37
- 7.36
- 7.35
- 7.34
- 7.33
- 7.32
- 7.31
- 7.30
- 7.29
- 7.28
- 7.27
- 7.26

CDCl3

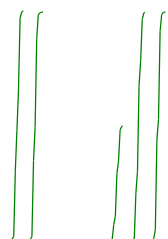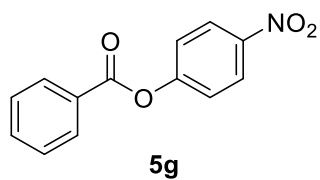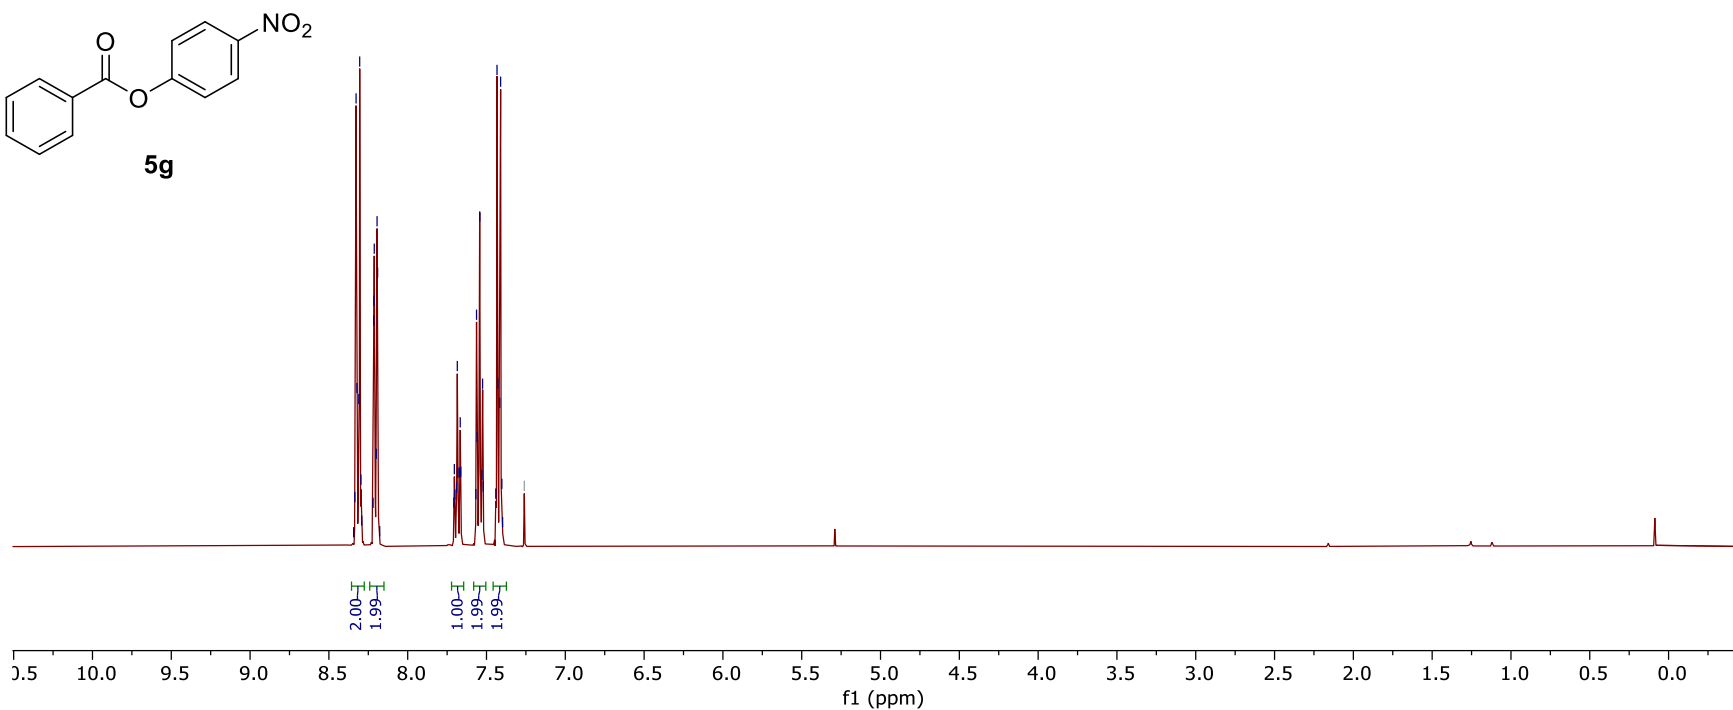

S-39

18162932.11.1.1r

SLC:LN3:LB-001-45A-PURIFY

Carbon sur CDC13 /home/jamr/localdata

164.83  
155.97  
147.18  
134.17  
130.42  
128.90  
128.80  
122.67  
122.56

77.16 CDC13

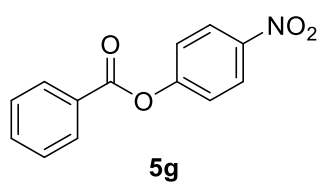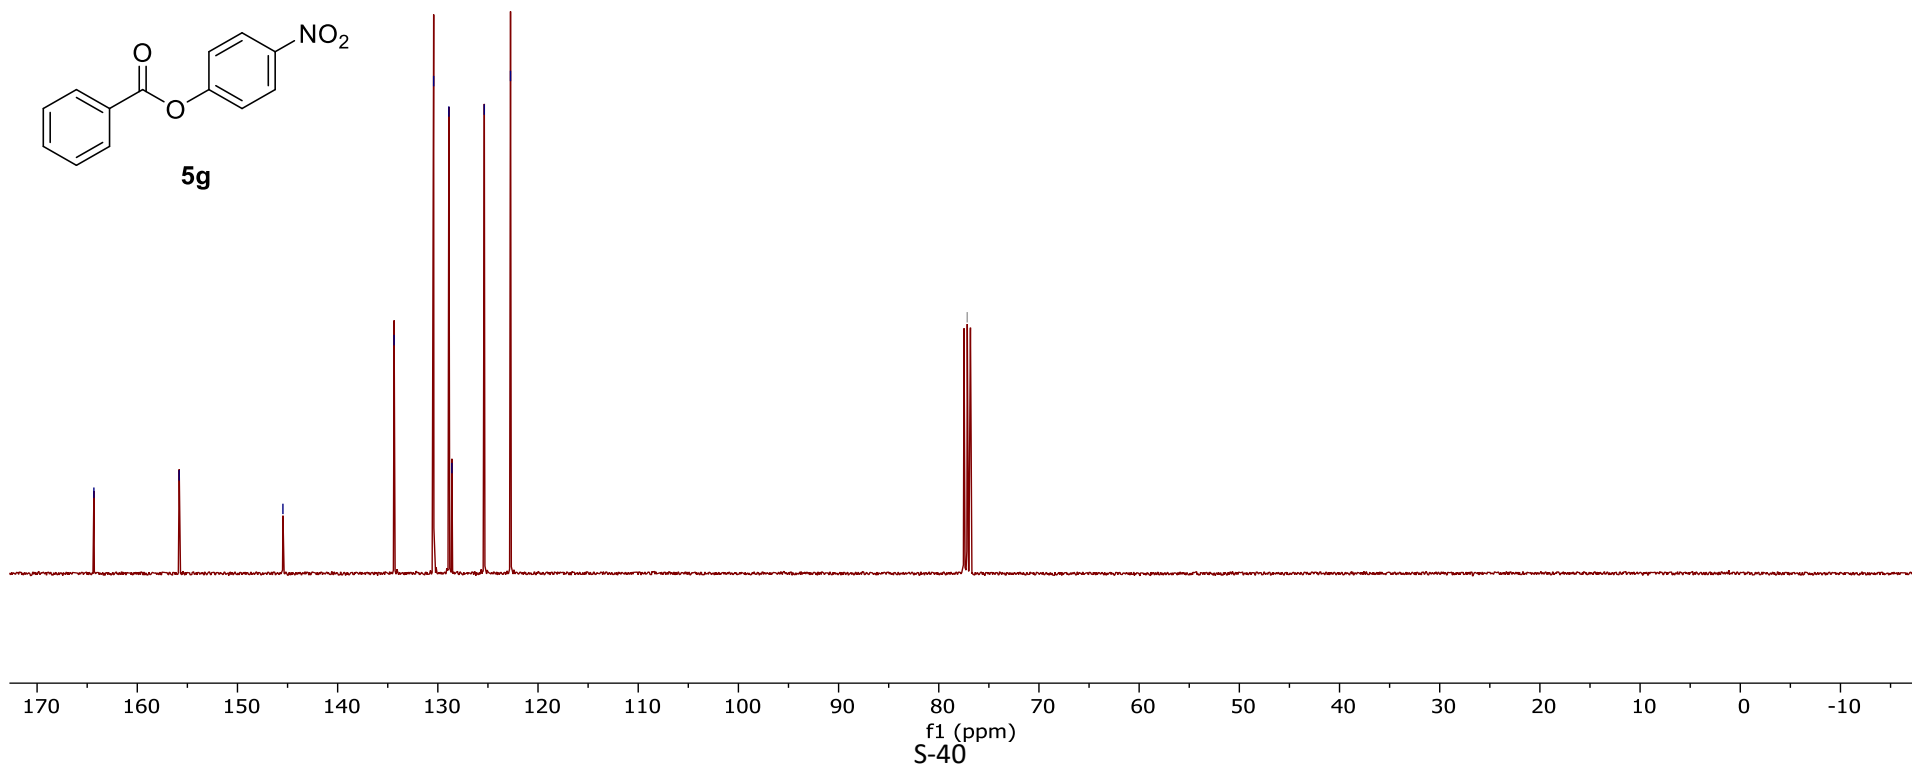



10172323.10.1.1r  
SLC:LNB:LB-COMBIFLASH-4  
Proton1.icon CDCl3 /home/

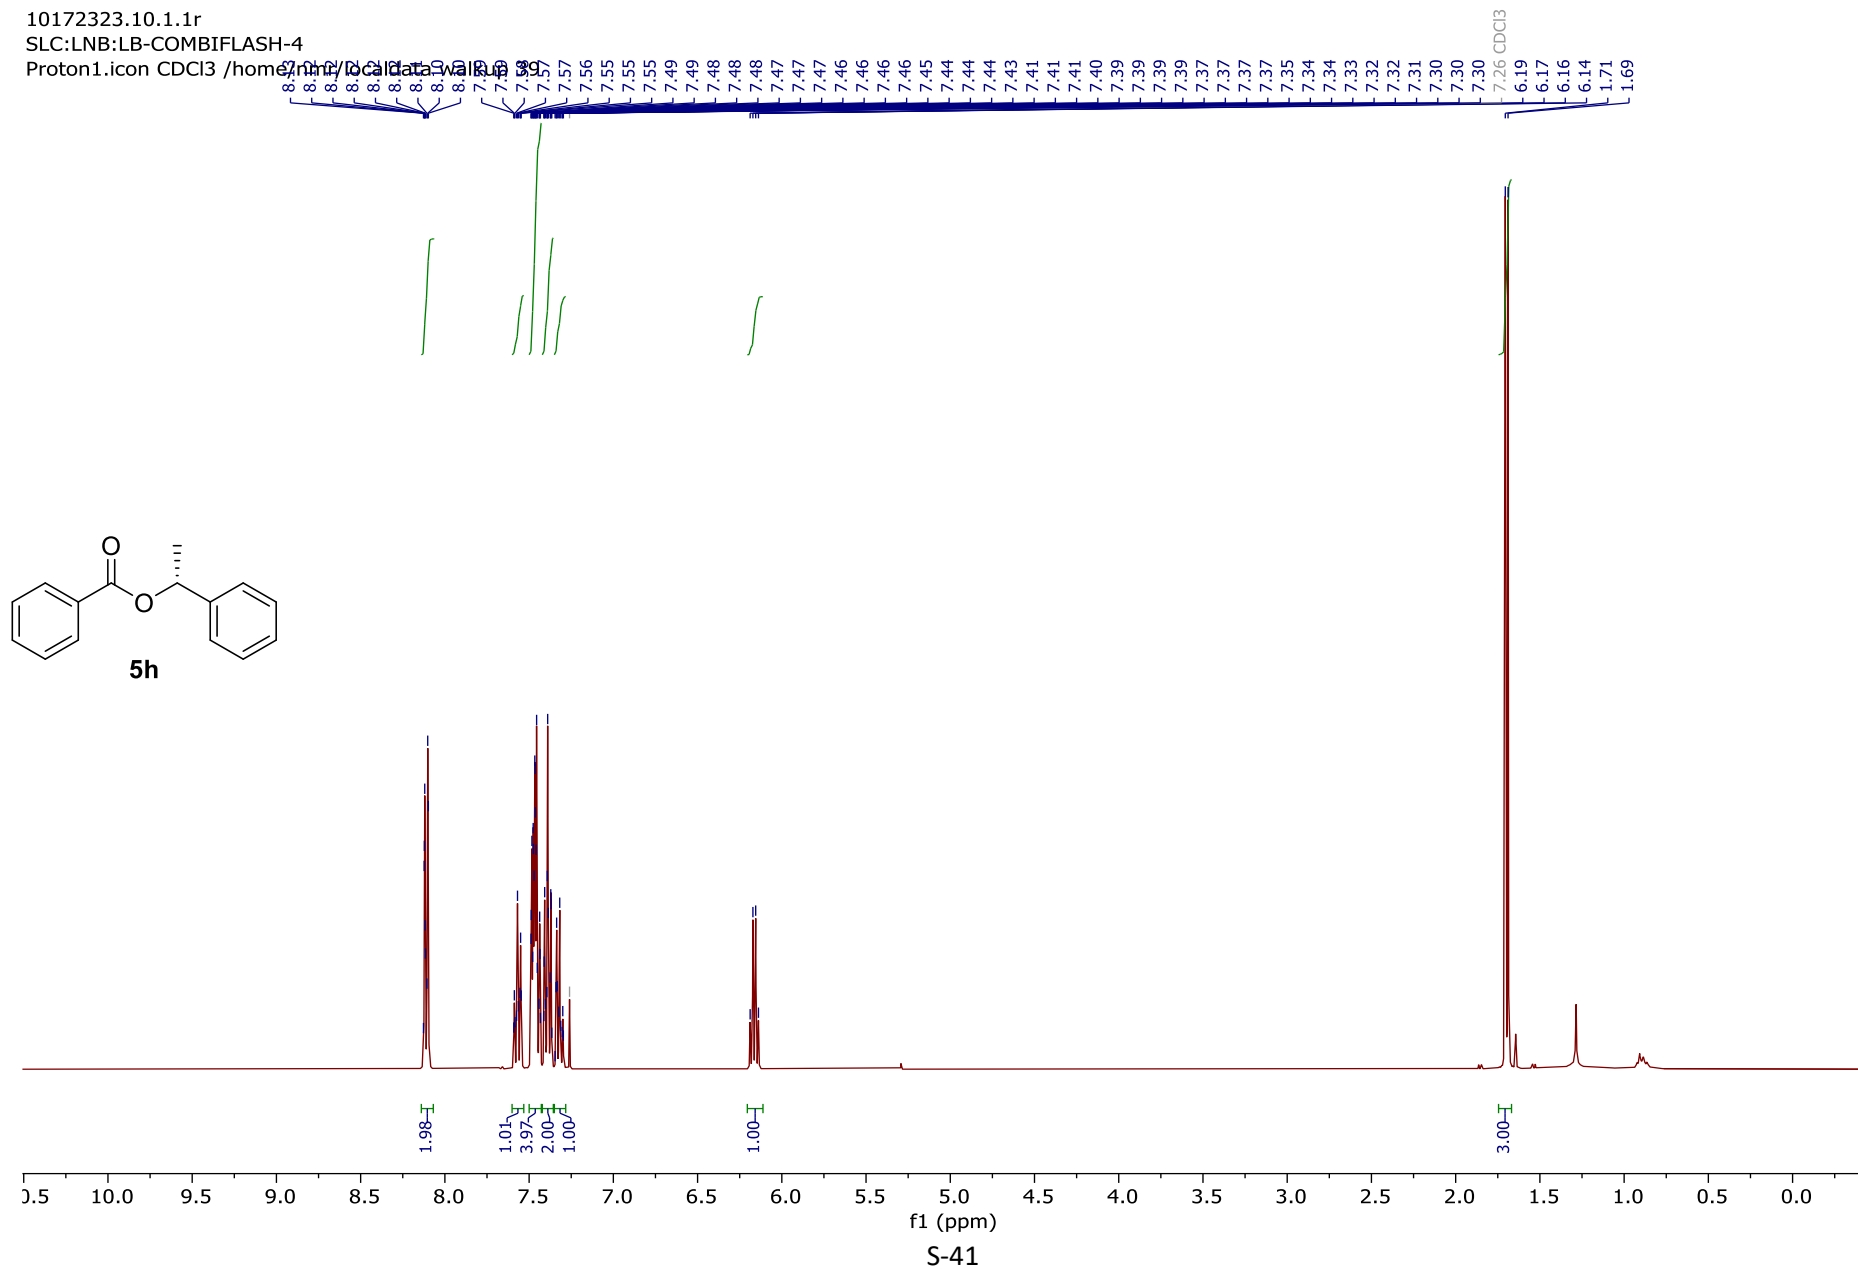

10172323.11.1.1r  
SLC:LNB:LB-COMBIFLASH-4  
Carbon.dur CDCl3 /home/nmr/localdata/walkup 39

141.83  
132.97  
130.55  
129.69  
128.60  
128.38  
127.94  
126.09

72.96

22.48

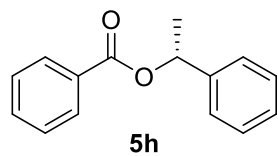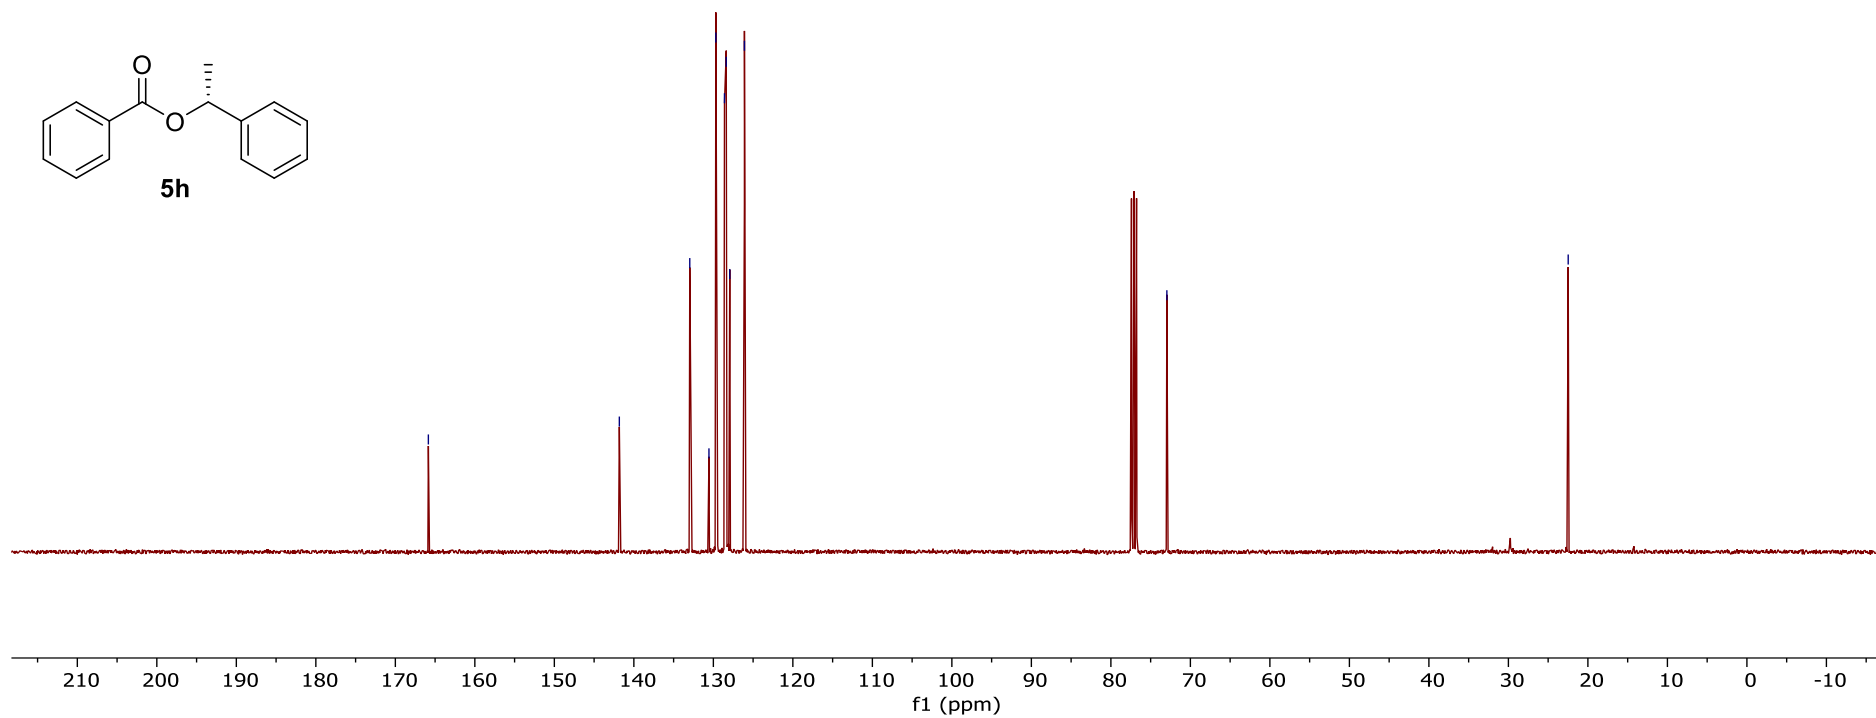

27154953.10.1.1r  
SLC:LNB:LB-001-136A  
Proton1.icon CDCl3

8.17, 8.16, 8.15, 8.14, 8.13, 8.12, 8.11, 8.10, 8.09, 8.08, 8.07, 8.06, 8.05, 8.04, 8.03, 8.02, 8.01, 7.99, 7.98, 7.97, 7.96, 7.95, 7.94, 7.93, 7.92, 7.91, 7.90, 7.89, 7.88, 7.87, 7.86, 7.85, 7.84, 7.83, 7.82, 7.81, 7.80, 7.79, 7.78, 7.77, 7.76, 7.75, 7.74, 7.73, 7.72, 7.71, 7.70, 7.69, 7.68, 7.67, 7.66, 7.65, 7.64, 7.63, 7.62, 7.61, 7.60, 7.59, 7.58, 7.57, 7.56, 7.55, 7.54, 7.53, 7.52, 7.51, 7.50, 7.49, 7.48, 7.47, 7.46, 7.45, 7.44, 7.43, 7.42, 7.41, 7.40, 7.39, 7.38, 7.37, 7.36, 7.35, 7.34, 7.33, 7.32, 7.31, 7.30, 7.29, 7.28, 7.27, 7.26, 7.25, 7.24, 7.23, 7.22, 7.21, 7.20, 7.19, 7.18, 7.17, 7.16, 7.15, 7.14, 7.13, 7.12, 7.11

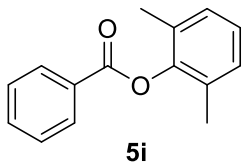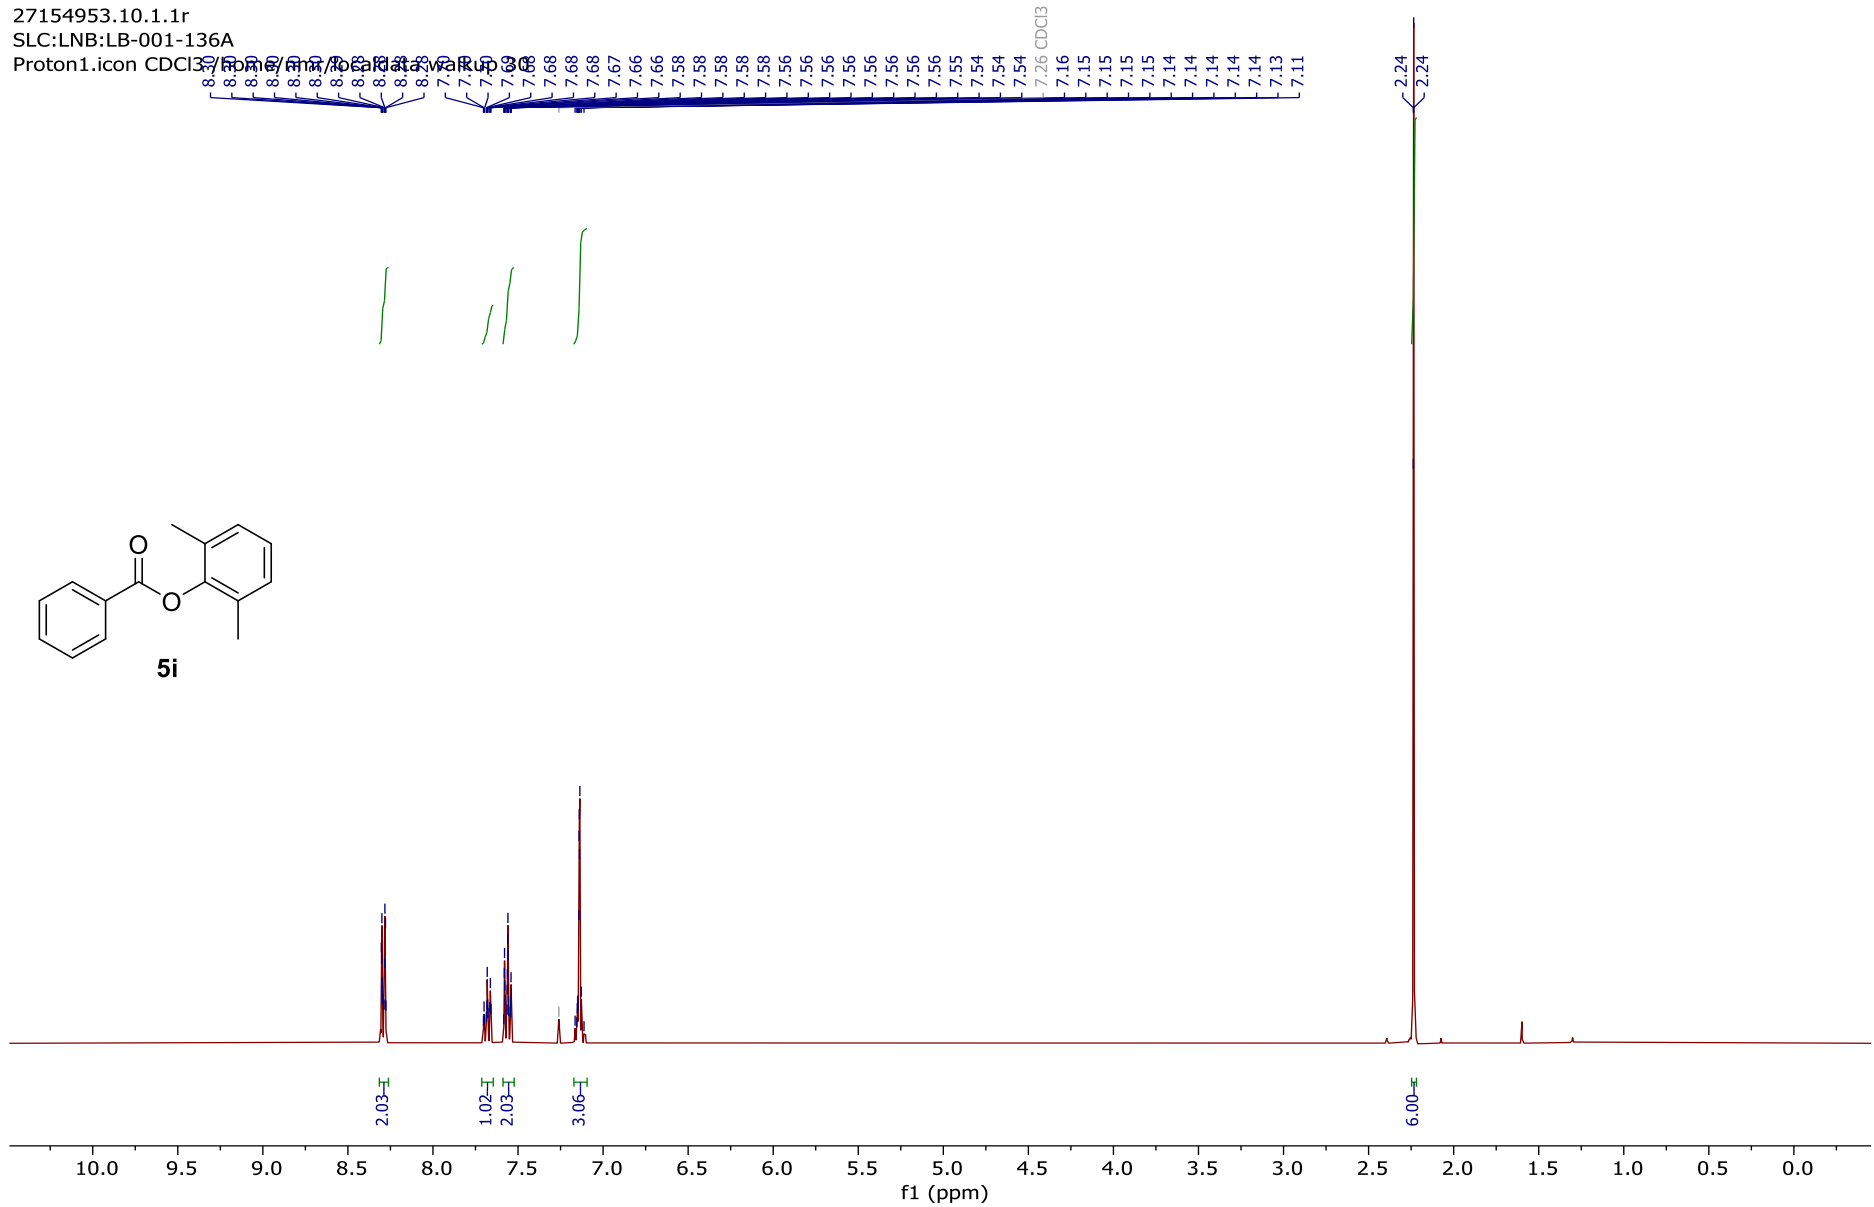

27154953.11.1.1r

SLC:LNB:LB-001-136A

Carbon.dur CDCl3 /home/nmr/localdata/walkup 30

166.76

148.45

133.69

130.46

130.28

129.39

128.75

128.72

126.02

77.16 CDCl3

16.50

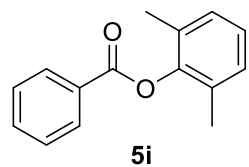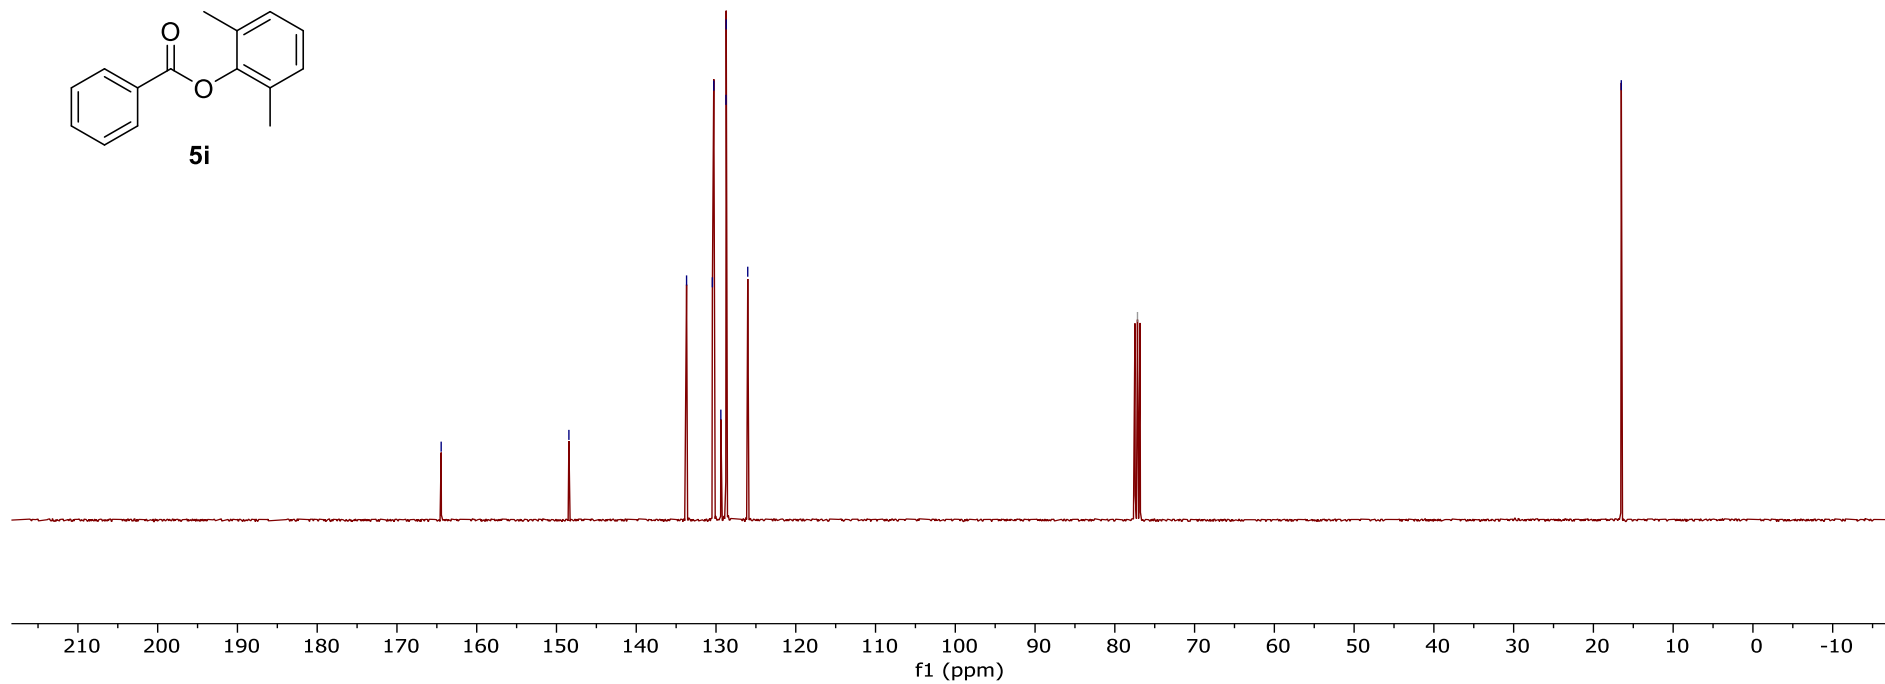

10160901.10.1.1r

SLC:LNB:LB-001-43a-REPURIFY

Proton. 2.34 2.11 H2O 1.24

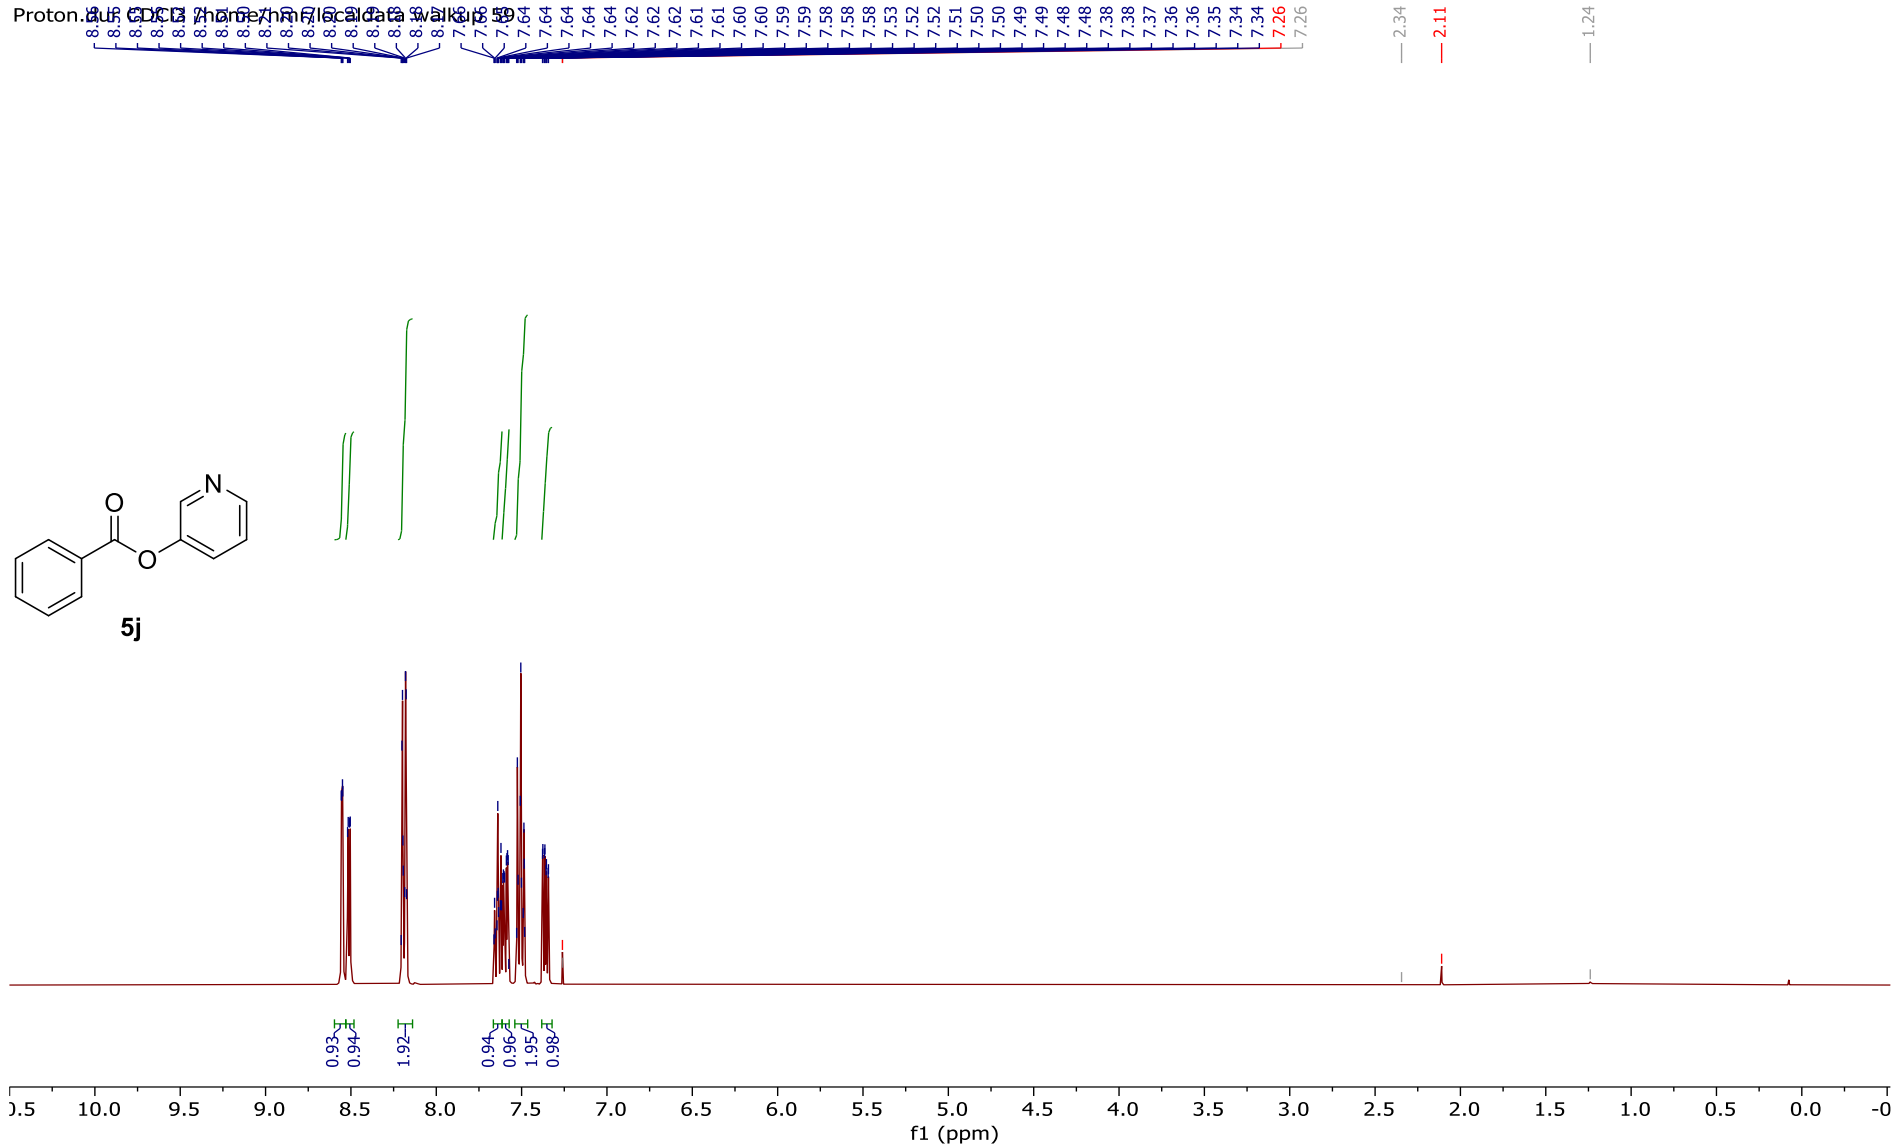

10160901.11.1.1r

SLC:LNB:LB-001-43a-REPURIFY

Carbon.dur CDCl3 /home/nmr/localdata/walkup 59

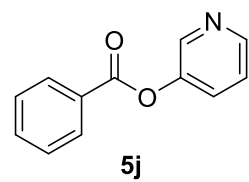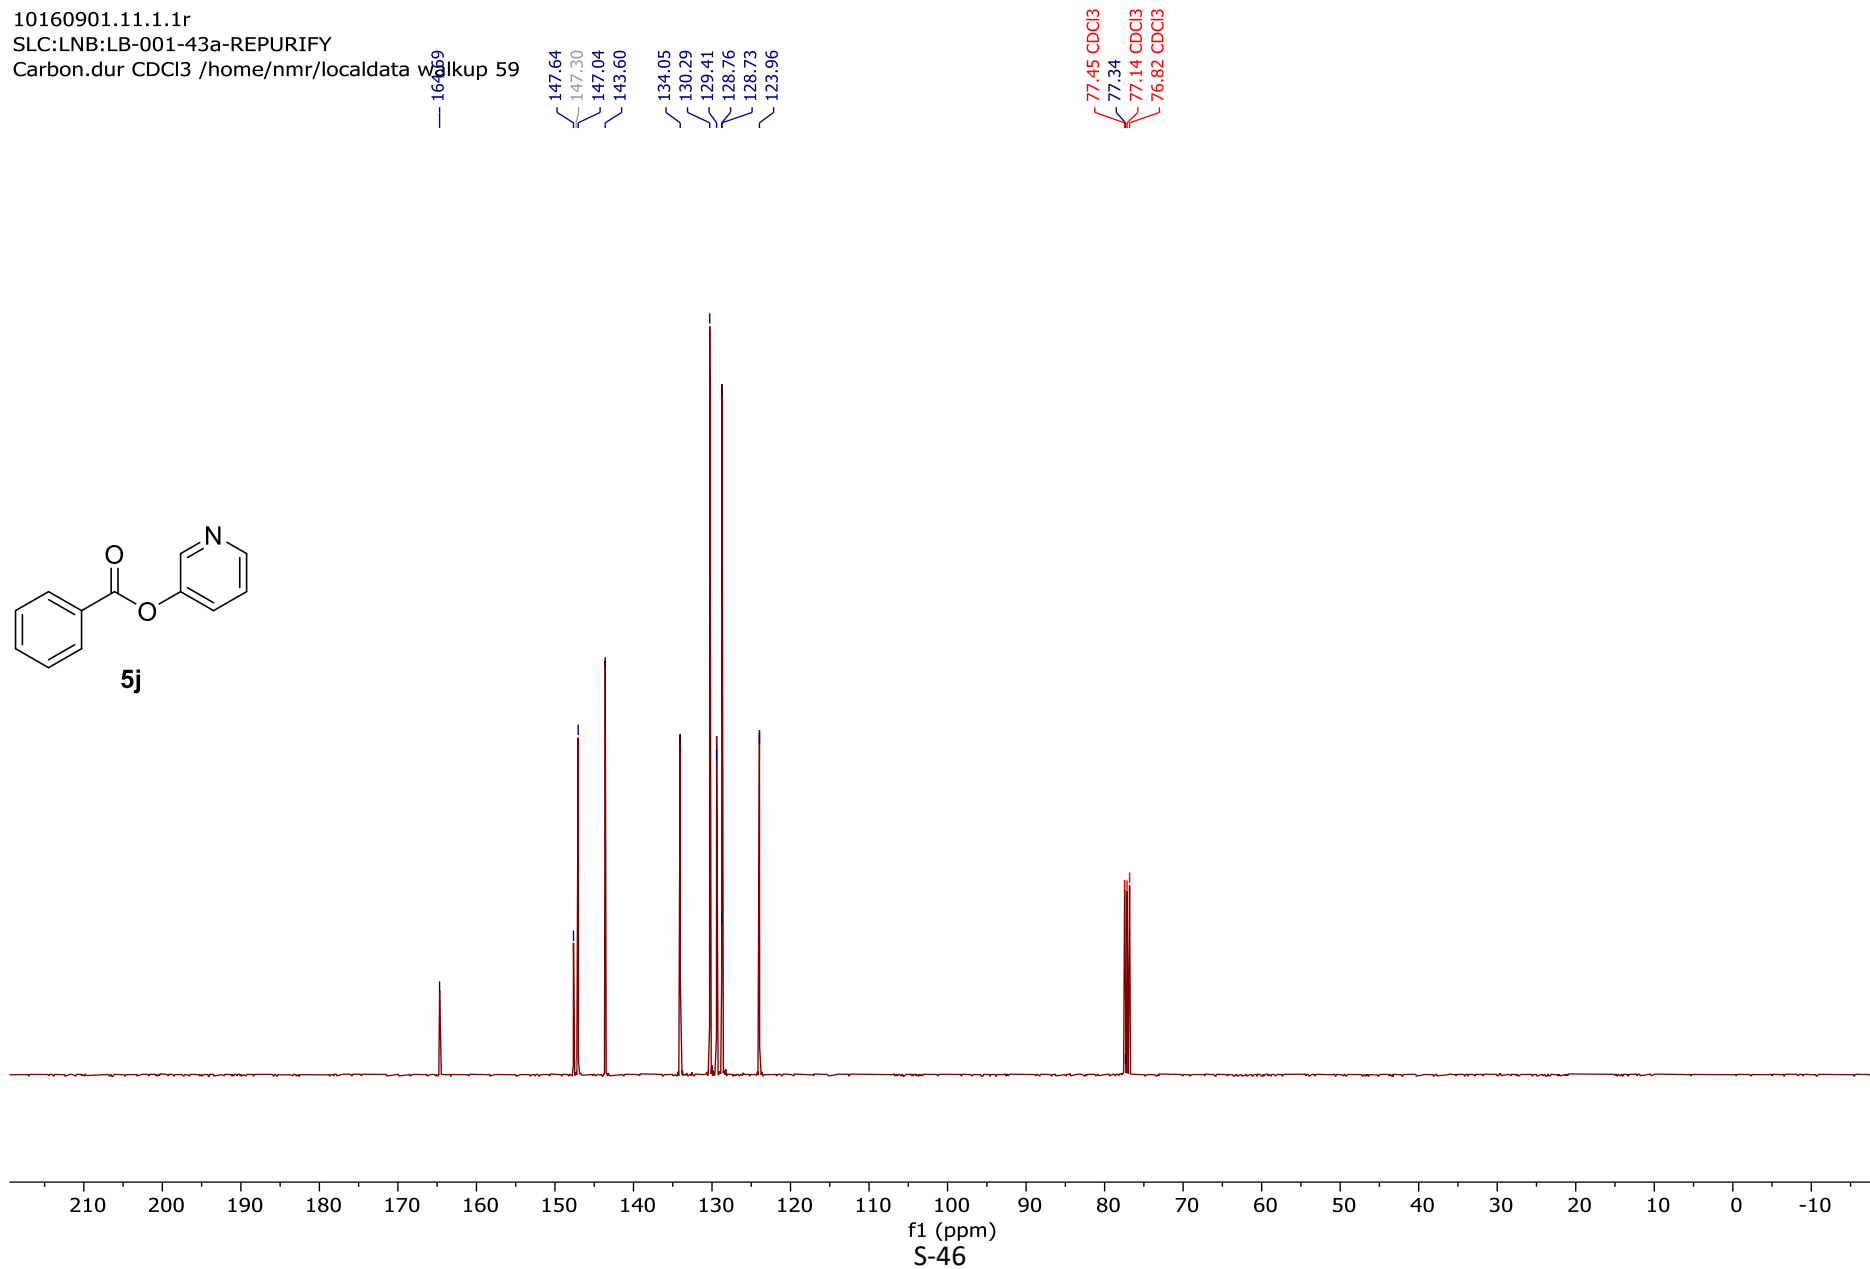

16170600.10.1.1r  
SLC:LNB:LB-001-44C-PURIFY  
Proton1.icon CDCl3 7.16 8.04 1.04 1.16 1.26 1.36 1.46 1.56 1.66 1.76 1.86 1.96 2.06 2.16 2.26 2.36 2.46 2.56 2.66 2.76 2.86 2.96 3.06 3.16 3.26 3.36 3.46 3.56 3.66 3.76 3.86 3.96 4.06 4.16 4.26 4.36 4.46 4.56 4.66 4.76 4.86 4.96 5.06 5.16 5.26 5.36 5.46 5.56 5.66 5.76 5.86 5.96 6.06 6.16 6.26 6.36 6.46 6.56 6.66 6.76 6.86 6.96 7.06 7.16 7.26 7.36 7.46 7.56 7.66 7.76 7.86 7.96 8.06 8.16 8.26 8.36 8.46 8.56 8.66 8.76 8.86 8.96 9.06 9.16 9.26 9.36 9.46 9.56 9.66 9.76 9.86 9.96

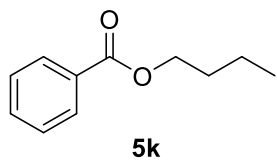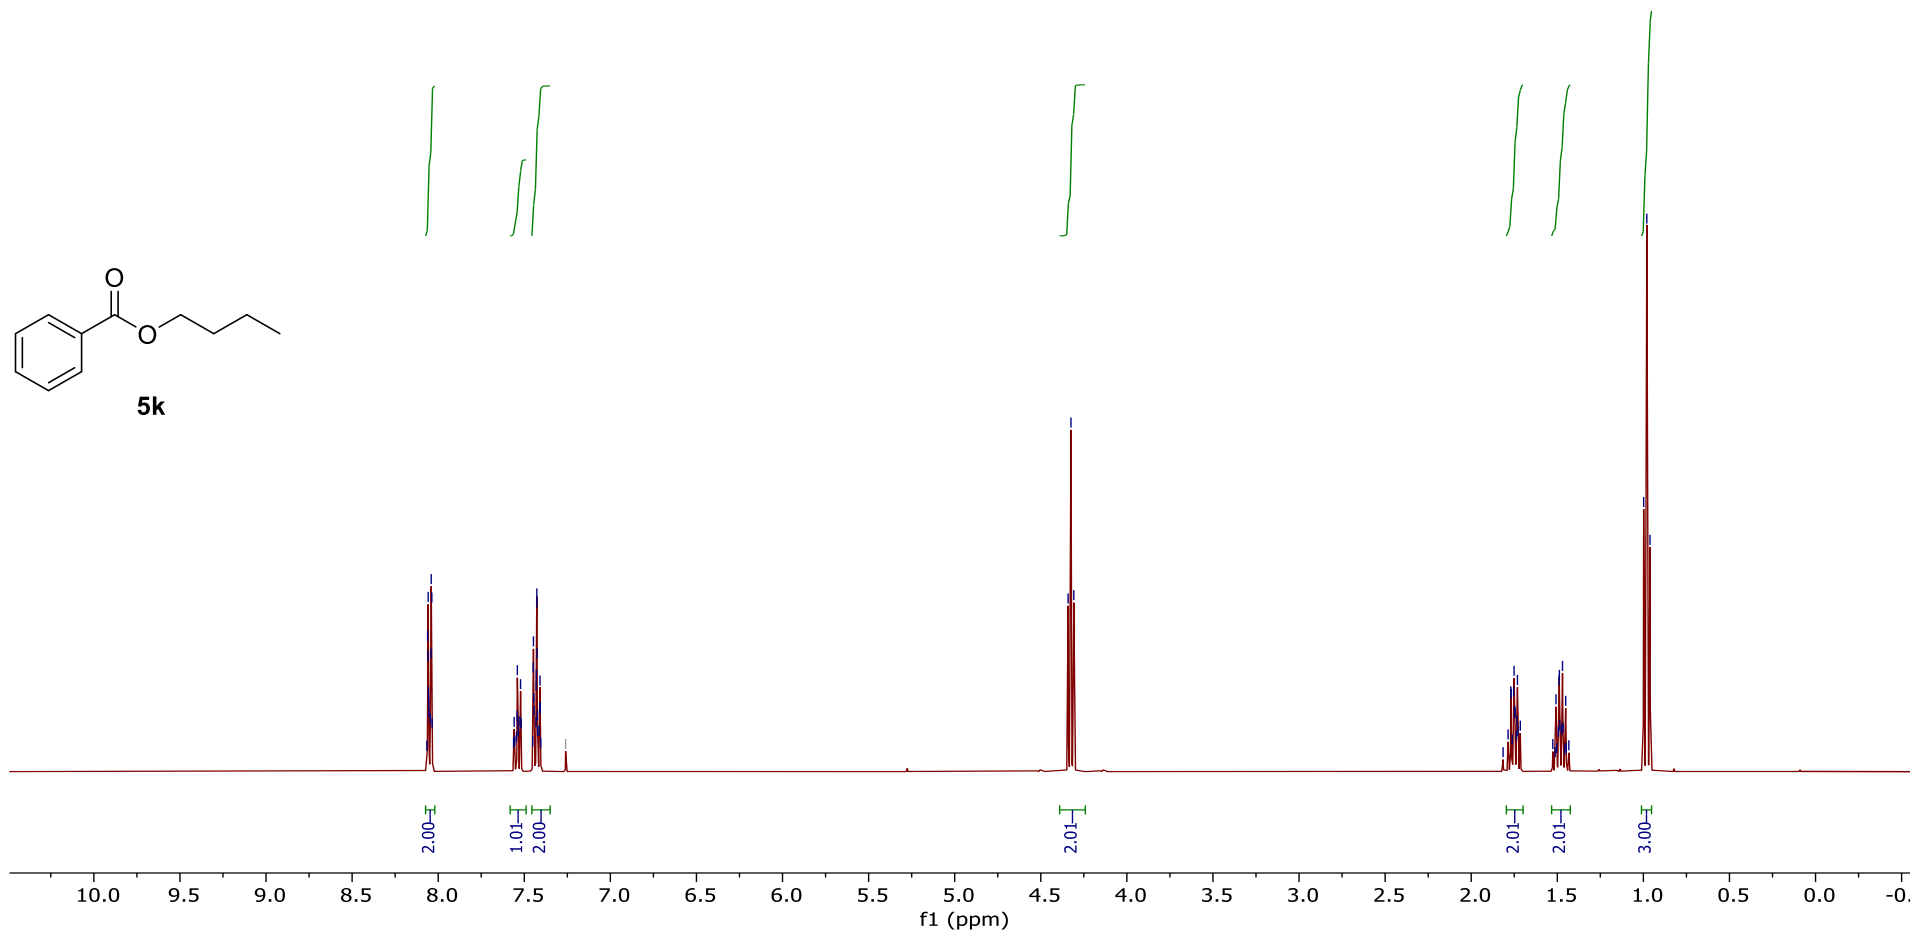

16170600.11.1.1r  
SLC:LNB:LB-001-44C-PURIFY  
Carbon.dur CDCl3 /home/nmr/localdata/walkup 25

132.80  
130.54  
129.54  
128.32

64.83

30.80

19.30

13.79

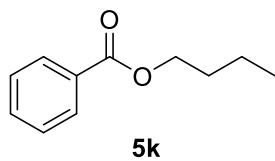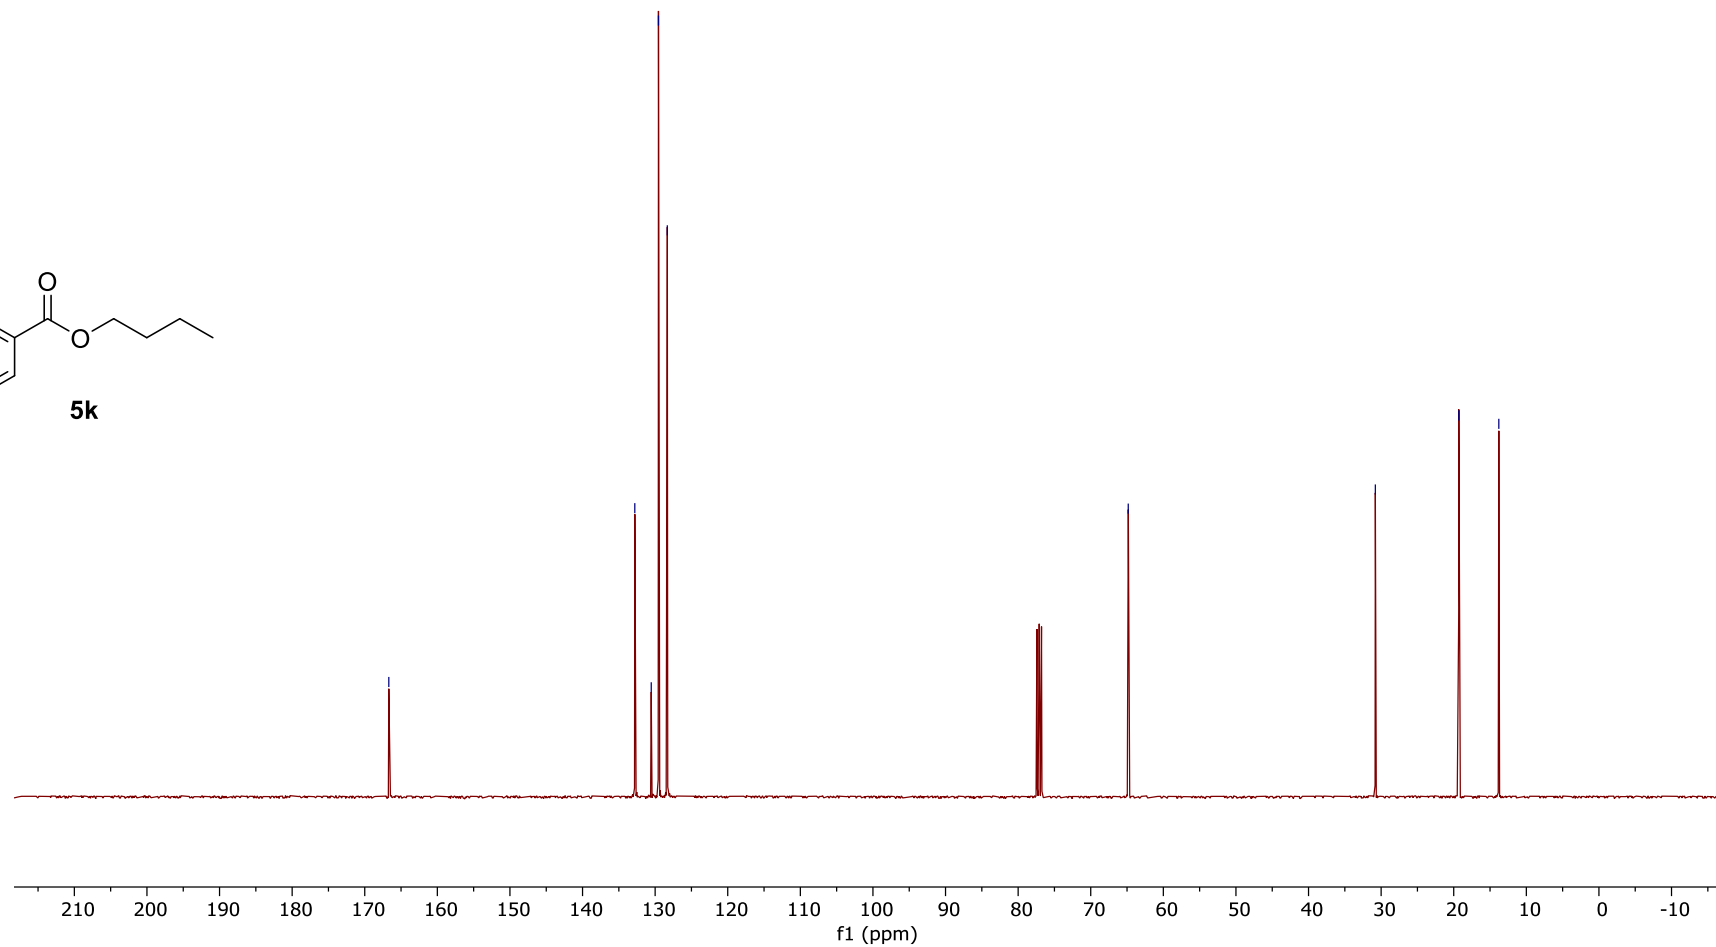



27141915.10.1.1r  
SLC:LNB:LB-001-35A-PURIFY  
Proton.dur CDCl3 /home/nb/1915/10/1/1r

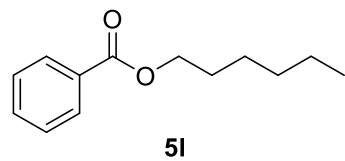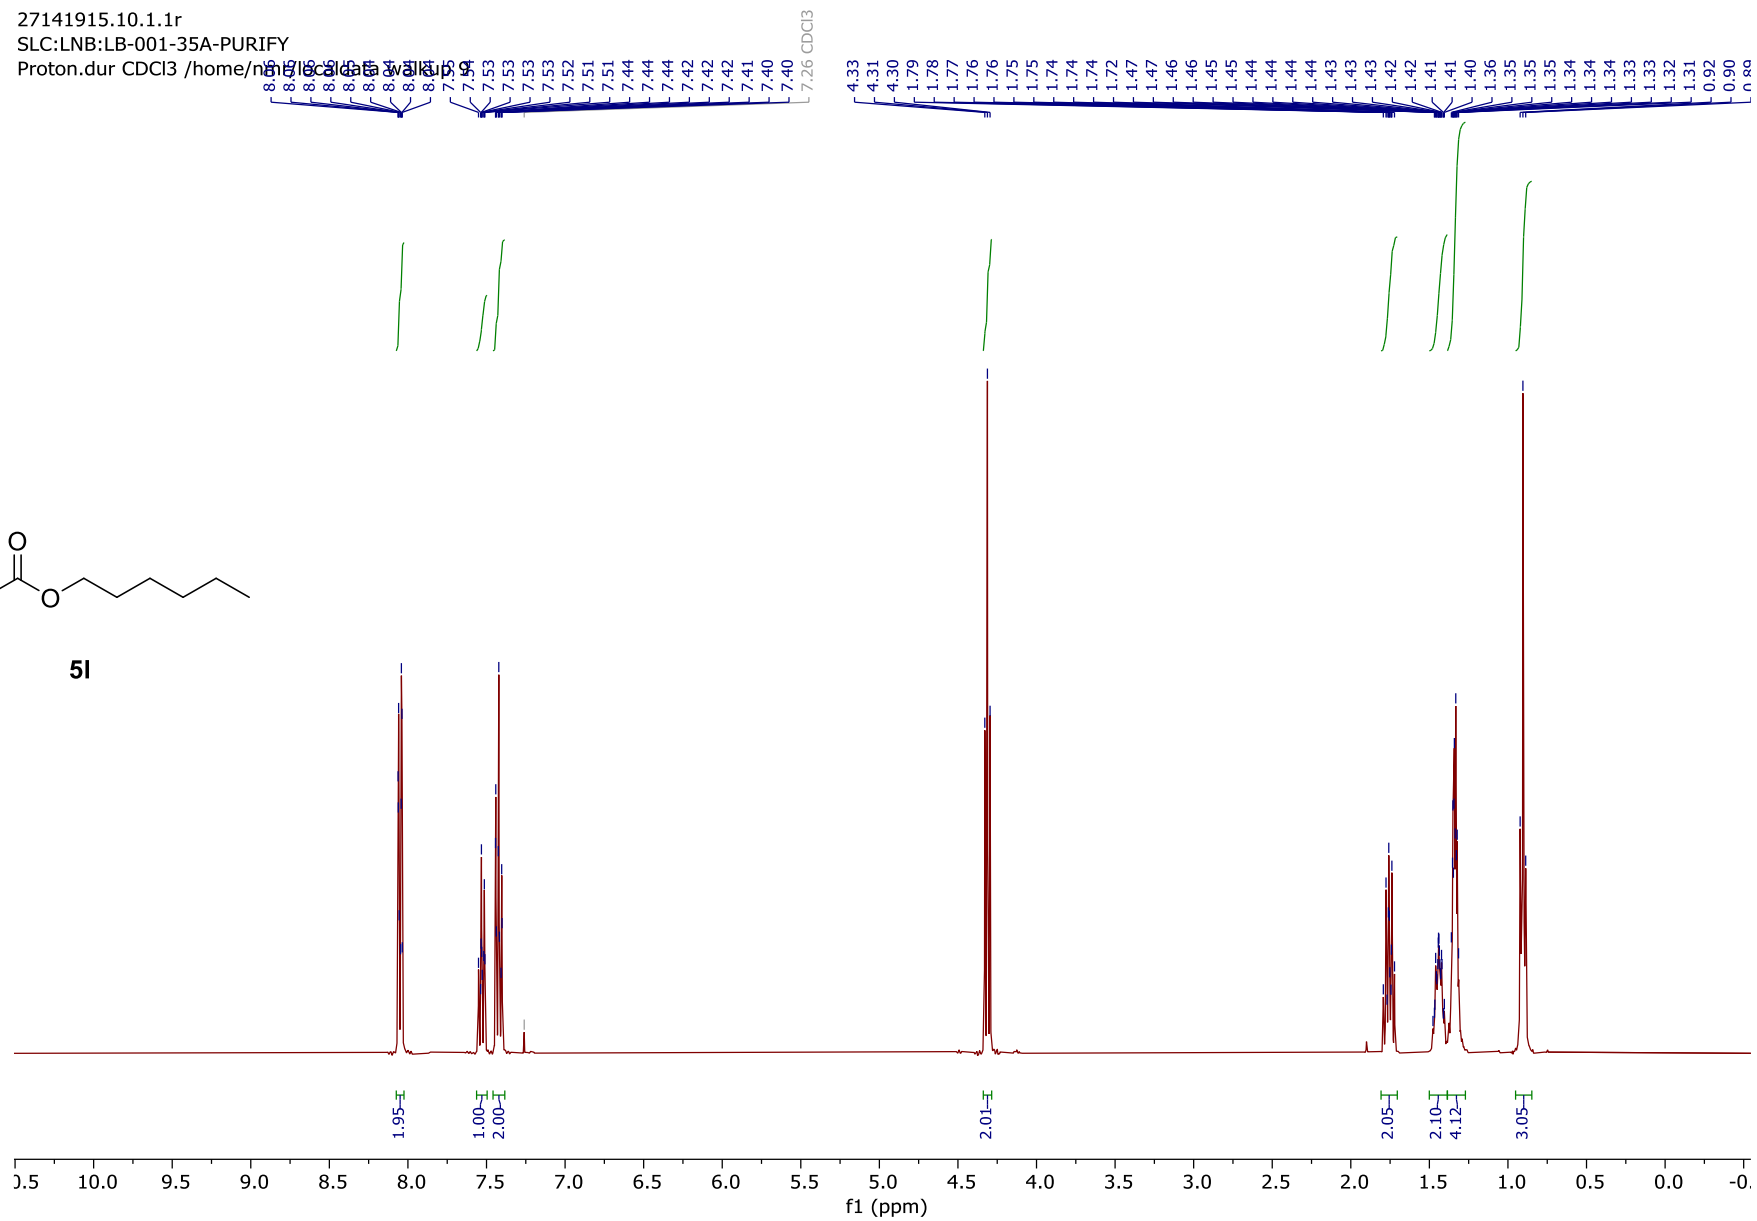

27141915.14.fid  
SLC:LNB:LB-001-35A-PURIFY  
Carbon\_10min.dur CDCl3 /home/nmr/loc data walkup 9

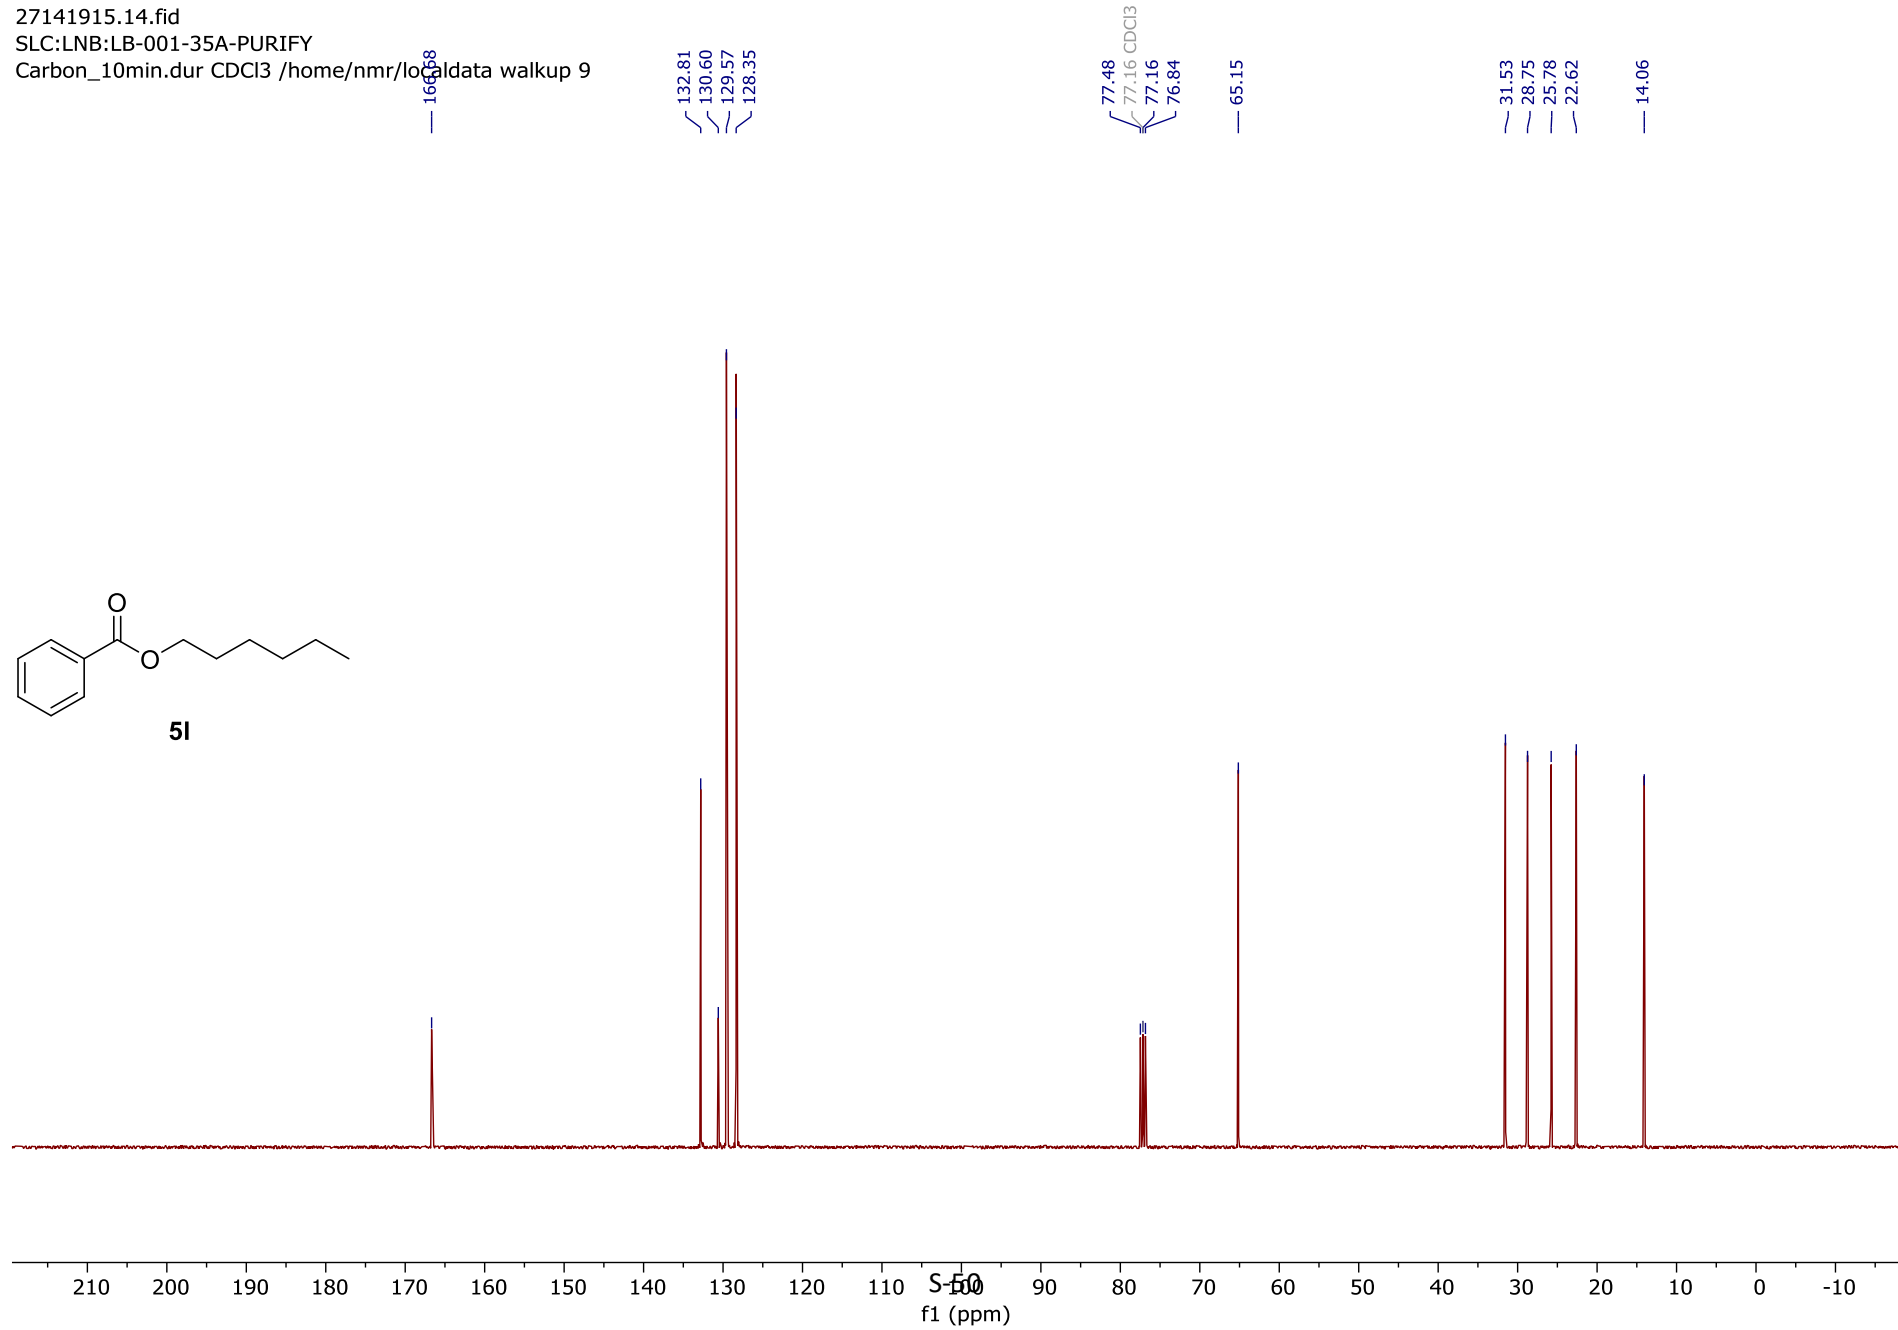

16101430.10314  
SLC:LNB:LB-001-08-LATERFRAC  
Proton.dur CDCl3 /home/nmi/localdata/walkup 8

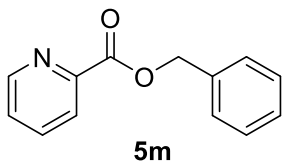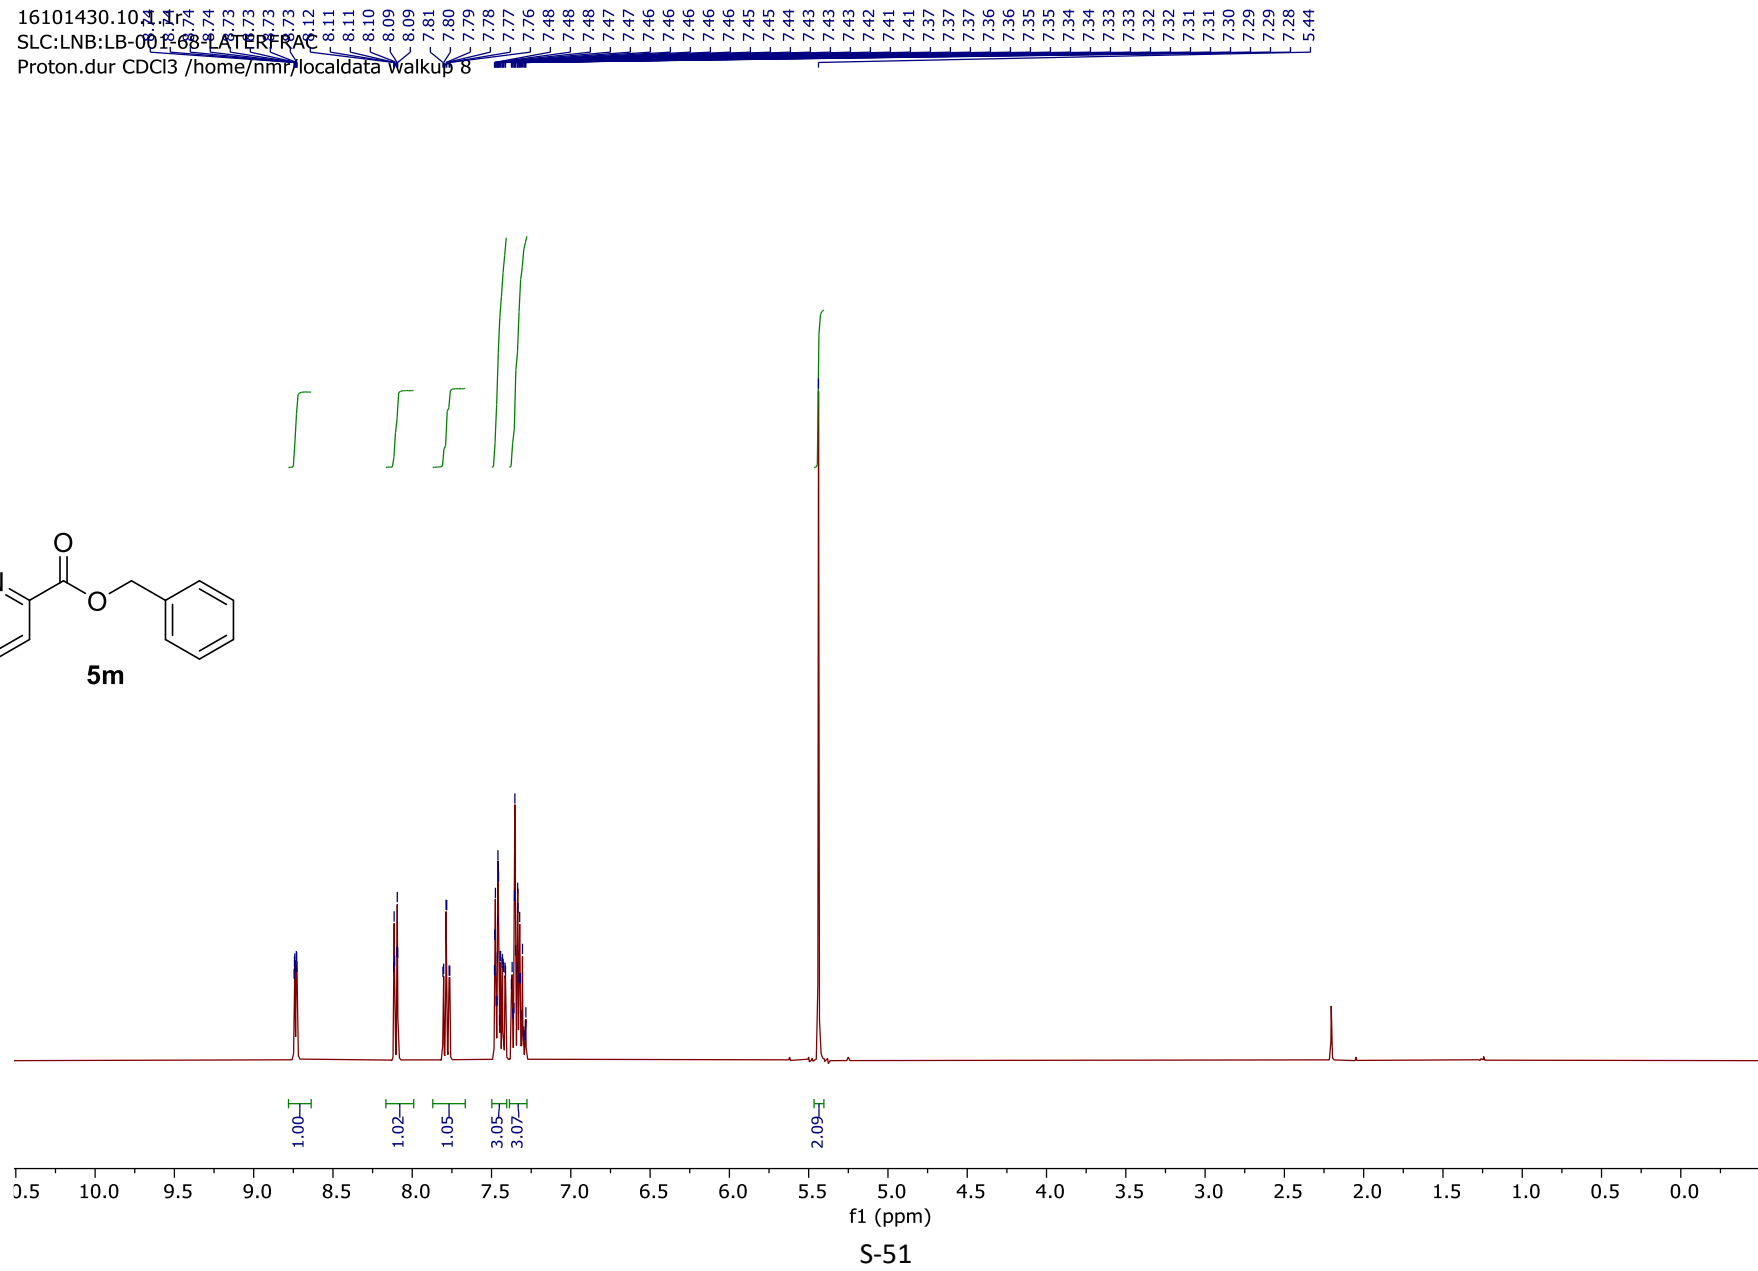

16101430.11.1.1r

SLC:LNB:LB-001-68-LATERFRAC

Carbon\_10min.dur CDCl3 /home/nmr/local/data/walk

166.85

146.89

147.92

136.96

135.57

128.56

128.53

128.37

126.92

125.22

77.16 CDCl3

67.45

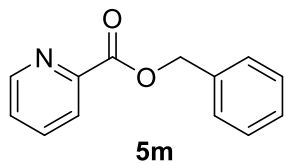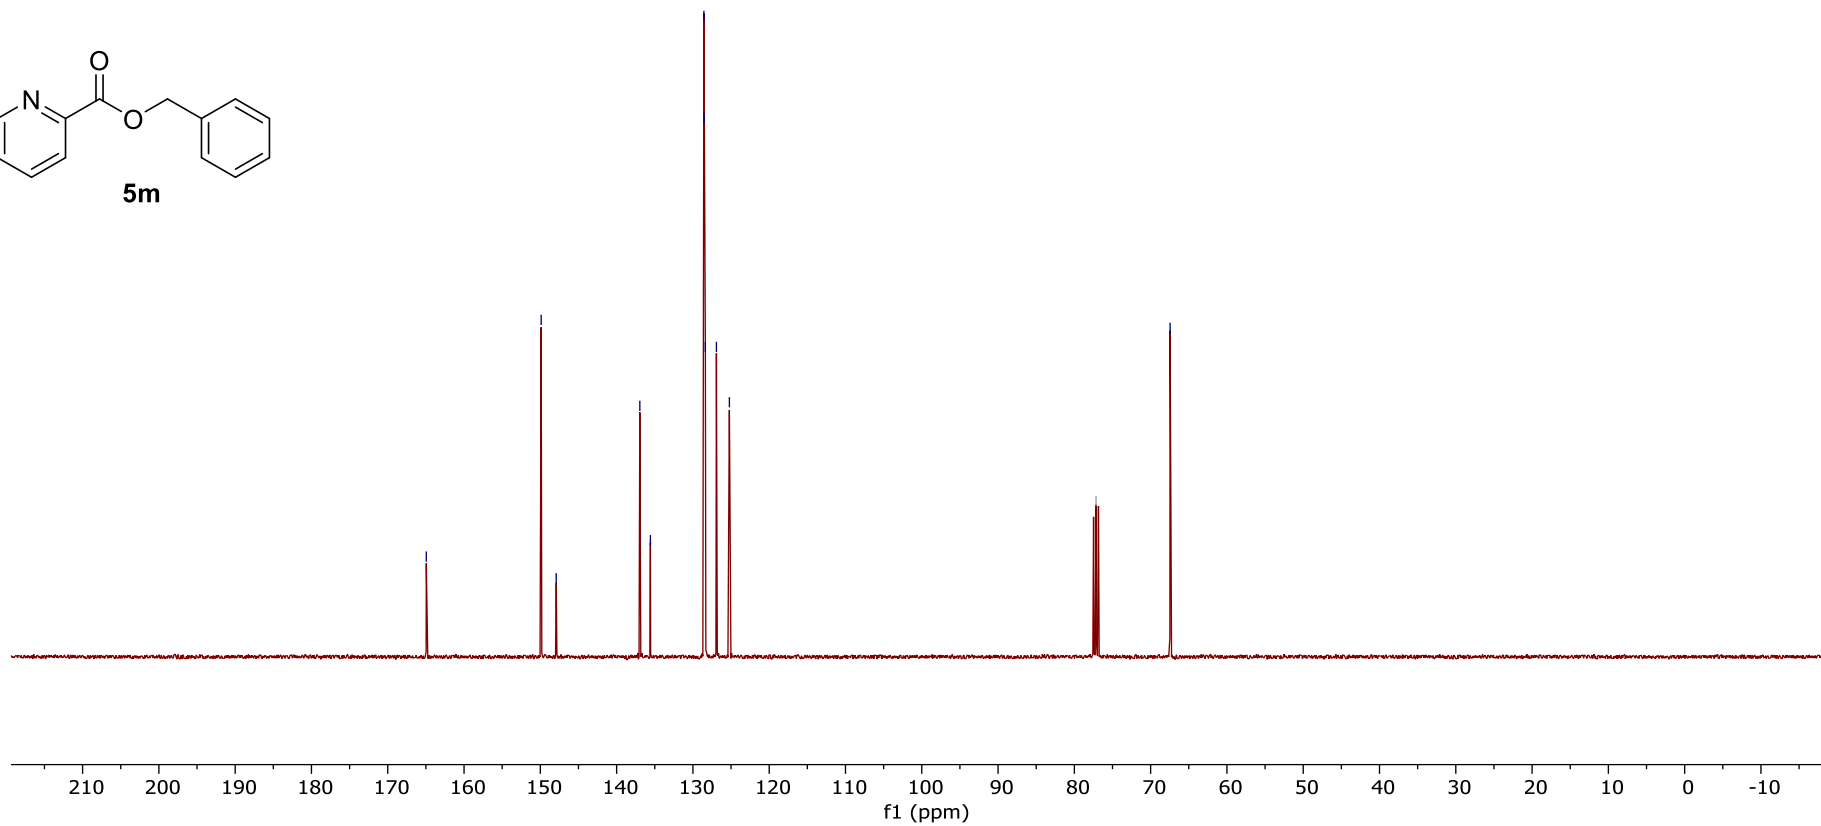

30103219.10.1.1r  
SLC:LNB:LB-001-90-PURIFY  
Proton.dur CDCl3 /home/nmr/local

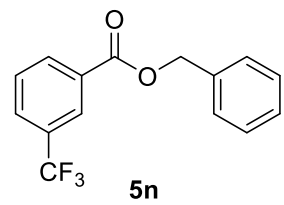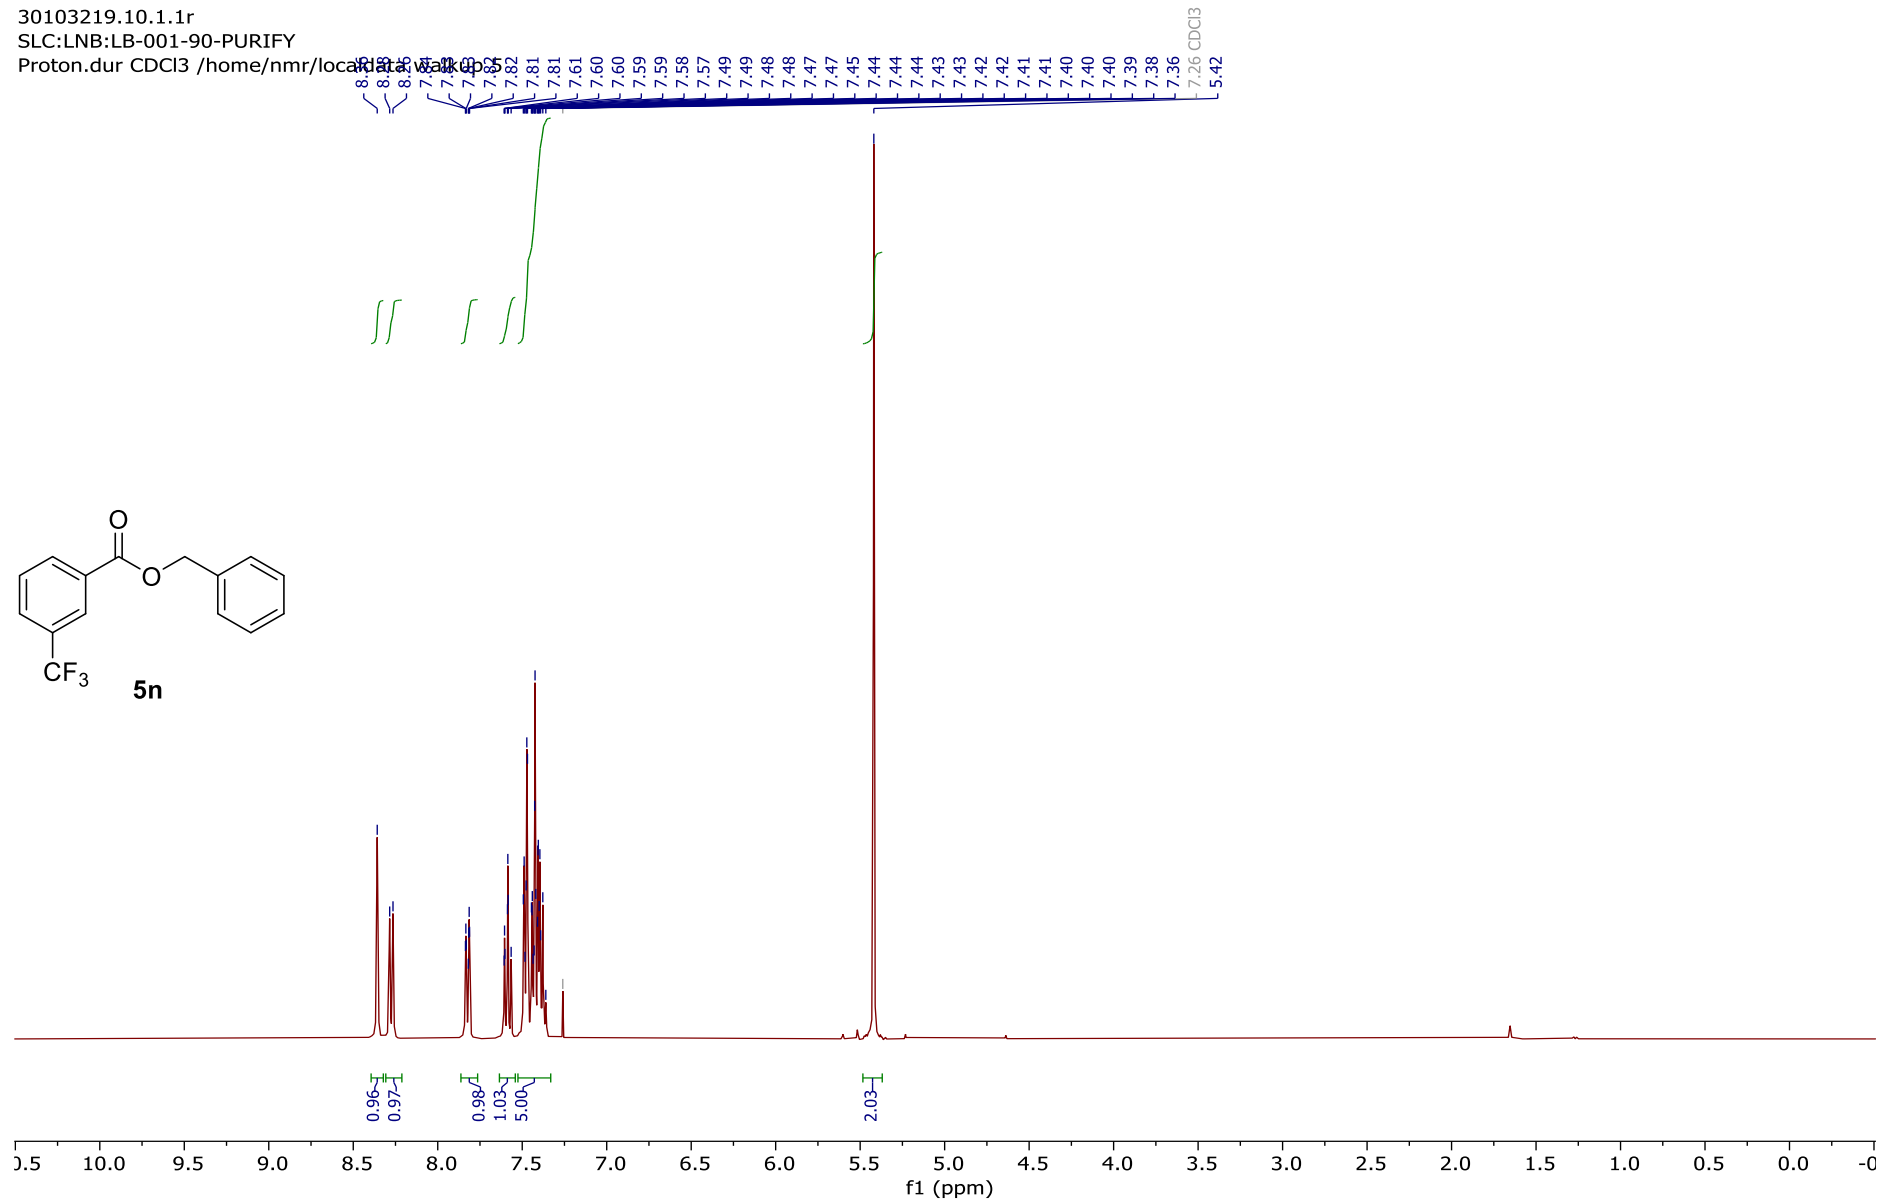

30103219.14.1.1r  
SLC:LNB:LB-001-90-PURIFY  
Carbon.dur CDCl3 /home/nmr/localdata/walkup 5

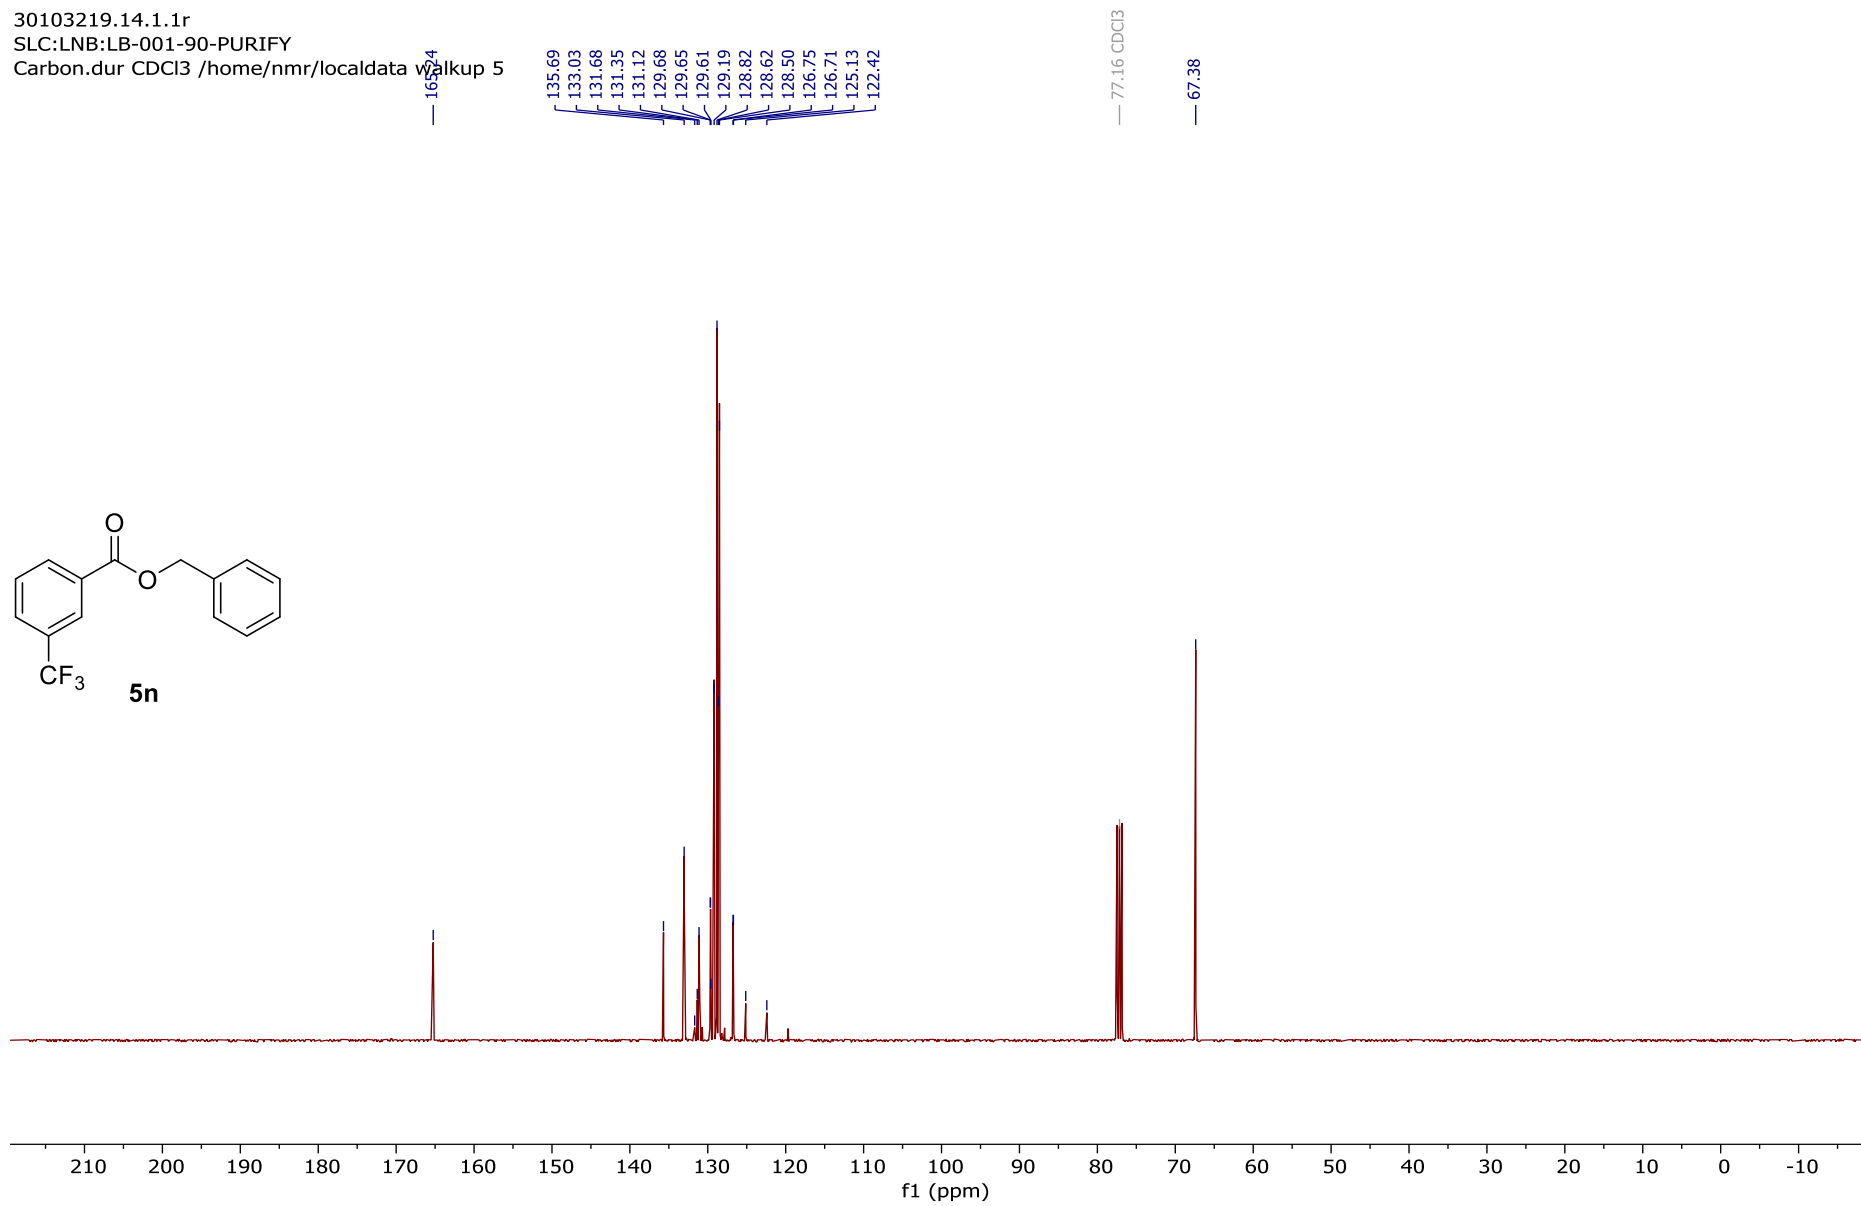

30103219.13.1.1r  
SLC:LNB:LB-001-90-PURIFY  
F19\_limits\_dec.dur CDCl3 /home/nmr/localdata walkup 5

-62.75  
-62.75

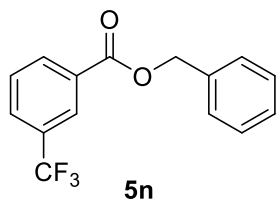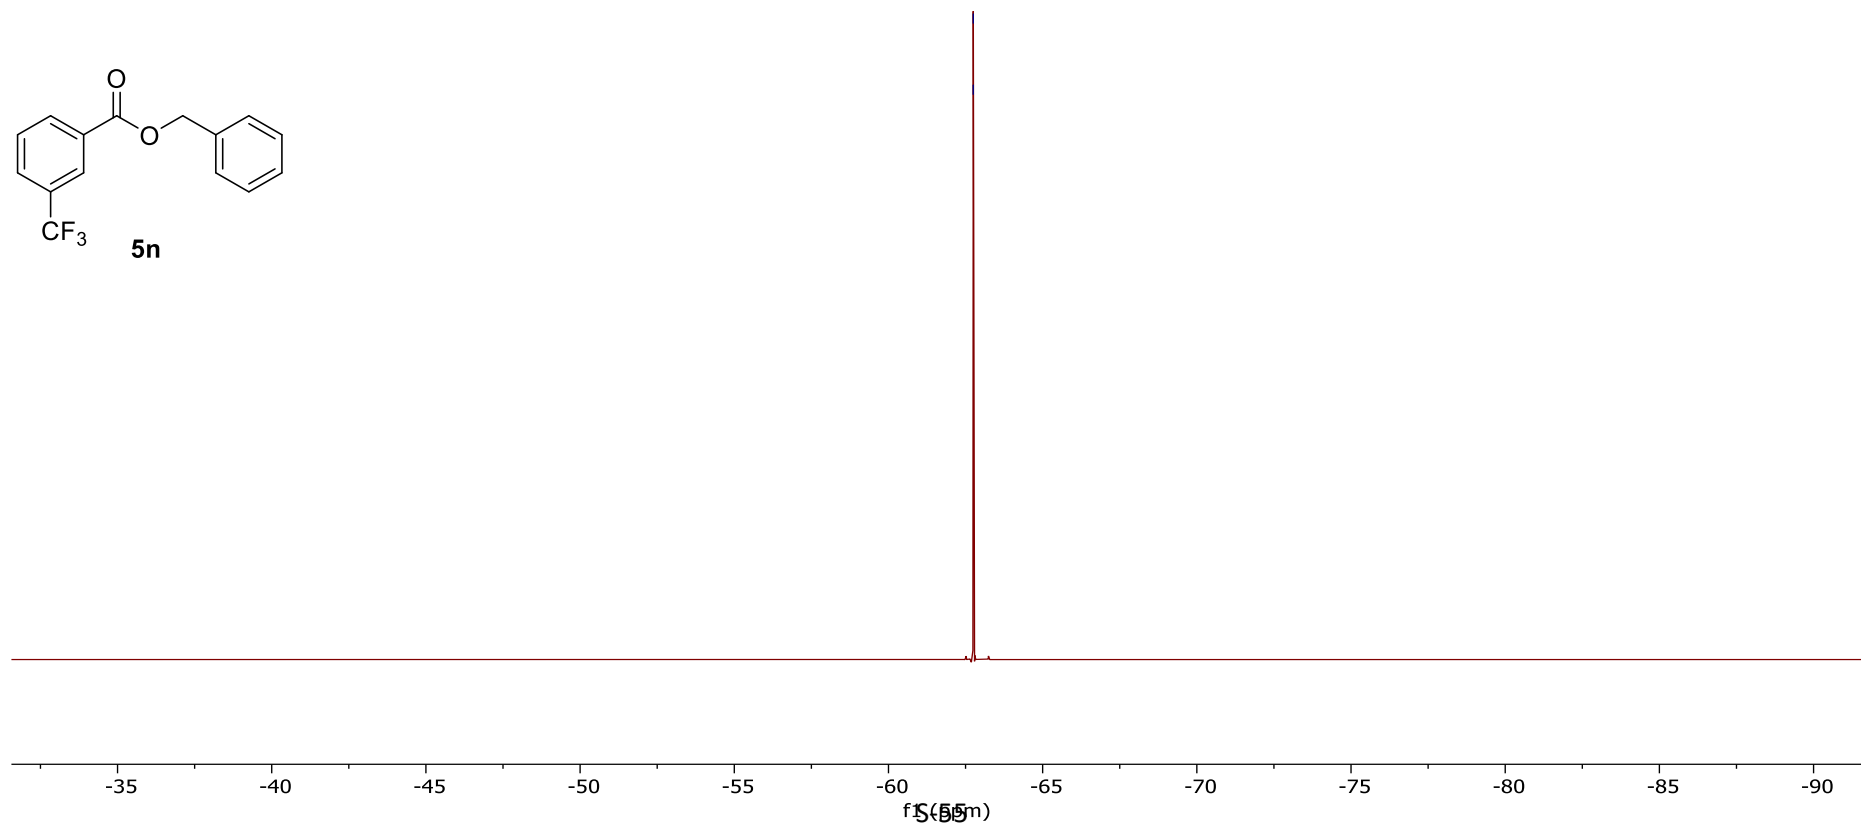

30103204.10.1.1r  
SLC:LNB:LB-001-89-PURIFY-PROTON

8.81, 8.79, 8.77, 8.76, 8.75, 8.74, 8.73, 8.72, 8.71, 8.70, 8.69, 8.68, 8.67, 8.66, 8.65, 8.64, 8.63, 8.62, 8.61, 8.60, 8.59, 8.58, 8.57, 8.56, 8.55, 8.54, 8.53, 8.52, 8.51, 8.50, 8.49, 8.48, 8.47, 8.46, 8.45, 8.44, 8.43, 8.42, 8.41, 8.40, 8.39, 8.38, 8.37, 8.36, 8.35, 8.34, 8.33, 8.32, 8.31, 8.30, 8.29, 8.28, 8.27, 8.26, 8.25, 8.24, 8.23, 8.22, 8.21, 8.20, 8.19, 8.18, 8.17, 8.16, 8.15, 8.14, 8.13, 8.12, 8.11, 8.10, 8.09, 8.08, 8.07, 8.06, 8.05, 8.04, 8.03, 8.02, 8.01, 8.00, 7.99, 7.98, 7.97, 7.96, 7.95, 7.94, 7.93, 7.92, 7.91, 7.90, 7.89, 7.88, 7.87, 7.86, 7.85, 7.84, 7.83, 7.82, 7.81, 7.80, 7.79, 7.78, 7.77, 7.76, 7.75, 7.74, 7.73, 7.72, 7.71, 7.70, 7.69, 7.68, 7.67, 7.66, 7.65, 7.64, 7.63, 7.62, 7.61, 7.60, 7.59, 7.58, 7.57, 7.56, 7.55, 7.54, 7.53, 7.52, 7.51, 7.50, 7.49, 7.48, 7.47, 7.46, 7.45, 7.44, 7.43, 7.42, 7.41, 7.40, 7.39, 7.38, 7.37, 7.36, 7.35, 7.34, 7.33, 7.32, 7.31, 7.30, 7.29, 7.28, 7.27, 7.26, 7.25, 7.24, 7.23, 7.22, 7.21, 7.20, 7.19, 7.18, 7.17, 7.16, 7.15, 7.14, 7.13, 7.12, 7.11, 7.10, 7.09, 7.08, 7.07, 7.06, 7.05, 7.04, 7.03, 7.02, 7.01, 7.00, 6.99, 6.98, 6.97, 6.96, 6.95, 6.94, 6.93, 6.92, 6.91, 6.90, 6.89, 6.88, 6.87, 6.86, 6.85, 6.84, 6.83, 6.82, 6.81, 6.80, 6.79, 6.78, 6.77, 6.76, 6.75, 6.74, 6.73, 6.72, 6.71, 6.70, 6.69, 6.68, 6.67, 6.66, 6.65, 6.64, 6.63, 6.62, 6.61, 6.60, 6.59, 6.58, 6.57, 6.56, 6.55, 6.54, 6.53, 6.52, 6.51, 6.50, 6.49, 6.48, 6.47, 6.46, 6.45, 6.44, 6.43, 6.42, 6.41, 6.40, 6.39, 6.38, 6.37, 6.36, 6.35, 6.34, 6.33, 6.32, 6.31, 6.30, 6.29, 6.28, 6.27, 6.26, 6.25, 6.24, 6.23, 6.22, 6.21, 6.20, 6.19, 6.18, 6.17, 6.16, 6.15, 6.14, 6.13, 6.12, 6.11, 6.10, 6.09, 6.08, 6.07, 6.06, 6.05, 6.04, 6.03, 6.02, 6.01, 6.00, 5.99, 5.98, 5.97, 5.96, 5.95, 5.94, 5.93, 5.92, 5.91, 5.90, 5.89, 5.88, 5.87, 5.86, 5.85, 5.84, 5.83, 5.82, 5.81, 5.80, 5.79, 5.78, 5.77, 5.76, 5.75, 5.74, 5.73, 5.72, 5.71, 5.70, 5.69, 5.68, 5.67, 5.66, 5.65, 5.64, 5.63, 5.62, 5.61, 5.60, 5.59, 5.58, 5.57, 5.56, 5.55, 5.54, 5.53, 5.52, 5.51, 5.50, 5.49, 5.48, 5.47, 5.46, 5.45, 5.44, 5.43, 5.42, 5.41, 5.40, 5.39, 5.38, 5.37, 5.36, 5.35, 5.34, 5.33, 5.32, 5.31, 5.30, 5.29, 5.28, 5.27, 5.26, 5.25, 5.24, 5.23, 5.22, 5.21, 5.20, 5.19, 5.18, 5.17, 5.16, 5.15, 5.14, 5.13, 5.12, 5.11, 5.10, 5.09, 5.08, 5.07, 5.06, 5.05, 5.04, 5.03, 5.02, 5.01, 5.00, 4.99, 4.98, 4.97, 4.96, 4.95, 4.94, 4.93, 4.92, 4.91, 4.90, 4.89, 4.88, 4.87, 4.86, 4.85, 4.84, 4.83, 4.82, 4.81, 4.80, 4.79, 4.78, 4.77, 4.76, 4.75, 4.74, 4.73, 4.72, 4.71, 4.70, 4.69, 4.68, 4.67, 4.66, 4.65, 4.64, 4.63, 4.62, 4.61, 4.60, 4.59, 4.58, 4.57, 4.56, 4.55, 4.54, 4.53, 4.52, 4.51, 4.50, 4.49, 4.48, 4.47, 4.46, 4.45, 4.44, 4.43, 4.42, 4.41, 4.40, 4.39, 4.38, 4.37, 4.36, 4.35, 4.34, 4.33, 4.32, 4.31, 4.30, 4.29, 4.28, 4.27, 4.26, 4.25, 4.24, 4.23, 4.22, 4.21, 4.20, 4.19, 4.18, 4.17, 4.16, 4.15, 4.14, 4.13, 4.12, 4.11, 4.10, 4.09, 4.08, 4.07, 4.06, 4.05, 4.04, 4.03, 4.02, 4.01, 4.00, 3.99, 3.98, 3.97, 3.96, 3.95, 3.94, 3.93, 3.92, 3.91, 3.90, 3.89, 3.88, 3.87, 3.86, 3.85, 3.84, 3.83, 3.82, 3.81, 3.80, 3.79, 3.78, 3.77, 3.76, 3.75, 3.74, 3.73, 3.72, 3.71, 3.70, 3.69, 3.68, 3.67, 3.66, 3.65, 3.64, 3.63, 3.62, 3.61, 3.60, 3.59, 3.58, 3.57, 3.56, 3.55, 3.54, 3.53, 3.52, 3.51, 3.50, 3.49, 3.48, 3.47, 3.46, 3.45, 3.44, 3.43, 3.42, 3.41, 3.40, 3.39, 3.38, 3.37, 3.36, 3.35, 3.34, 3.33, 3.32, 3.31, 3.30, 3.29, 3.28, 3.27, 3.26, 3.25, 3.24, 3.23, 3.22, 3.21, 3.20, 3.19, 3.18, 3.17, 3.16, 3.15, 3.14, 3.13, 3.12, 3.11, 3.10, 3.09, 3.08, 3.07, 3.06, 3.05, 3.04, 3.03, 3.02, 3.01, 3.00, 2.99, 2.98, 2.97, 2.96, 2.95, 2.94, 2.93, 2.92, 2.91, 2.90, 2.89, 2.88, 2.87, 2.86, 2.85, 2.84, 2.83, 2.82, 2.81, 2.80, 2.79, 2.78, 2.77, 2.76, 2.75, 2.74, 2.73, 2.72, 2.71, 2.70, 2.69, 2.68, 2.67, 2.66, 2.65, 2.64, 2.63, 2.62, 2.61, 2.60, 2.59, 2.58, 2.57, 2.56, 2.55, 2.54, 2.53, 2.52, 2.51, 2.50, 2.49, 2.48, 2.47, 2.46, 2.45, 2.44, 2.43, 2.42, 2.41, 2.40, 2.39, 2.38, 2.37, 2.36, 2.35, 2.34, 2.33, 2.32, 2.31, 2.30, 2.29, 2.28, 2.27, 2.26, 2.25, 2.24, 2.23, 2.22, 2.21, 2.20, 2.19, 2.18, 2.17, 2.16, 2.15, 2.14, 2.13, 2.12, 2.11, 2.10, 2.09, 2.08, 2.07, 2.06, 2.05, 2.04, 2.03, 2.02, 2.01, 2.00, 1.99, 1.98, 1.97, 1.96, 1.95, 1.94, 1.93, 1.92, 1.91, 1.90, 1.89, 1.88, 1.87, 1.86, 1.85, 1.84, 1.83, 1.82, 1.81, 1.80, 1.79, 1.78, 1.77, 1.76, 1.75, 1.74, 1.73, 1.72, 1.71, 1.70, 1.69, 1.68, 1.67, 1.66, 1.65, 1.64, 1.63, 1.62, 1.61, 1.60, 1.59, 1.58, 1.57, 1.56, 1.55, 1.54, 1.53, 1.52, 1.51, 1.50, 1.49, 1.48, 1.47, 1.46, 1.45, 1.44, 1.43, 1.42, 1.41, 1.40, 1.39, 1.38, 1.37, 1.36, 1.35, 1.34, 1.33, 1.32, 1.31, 1.30, 1.29, 1.28, 1.27, 1.26, 1.25, 1.24, 1.23, 1.22, 1.21, 1.20, 1.19, 1.18, 1.17, 1.16, 1.15, 1.14, 1.13, 1.12, 1.11, 1.10, 1.09, 1.08, 1.07, 1.06, 1.05, 1.04, 1.03, 1.02, 1.01, 1.00, 0.99, 0.98, 0.97, 0.96, 0.95, 0.94, 0.93, 0.92, 0.91, 0.90, 0.89, 0.88, 0.87, 0.86, 0.85, 0.84, 0.83, 0.82, 0.81, 0.80, 0.79, 0.78, 0.77, 0.76, 0.75, 0.74, 0.73, 0.72, 0.71, 0.70, 0.69, 0.68, 0.67, 0.66, 0.65, 0.64, 0.63, 0.62, 0.61, 0.60, 0.59, 0.58, 0.57, 0.56, 0.55, 0.54, 0.53, 0.52, 0.51, 0.50, 0.49, 0.48, 0.47, 0.46, 0.45, 0.44, 0.43, 0.42, 0.41, 0.40, 0.39, 0.38, 0.37, 0.36, 0.35, 0.34, 0.33, 0.32, 0.31, 0.30, 0.29, 0.28, 0.27, 0.26, 0.25, 0.24, 0.23, 0.22, 0.21, 0.20, 0.19, 0.18, 0.17, 0.16, 0.15, 0.14, 0.13, 0.12, 0.11, 0.10, 0.09, 0.08, 0.07, 0.06, 0.05, 0.04, 0.03, 0.02, 0.01, 0.00, -0.01, -0.02, -0.03, -0.04, -0.05, -0.06, -0.07, -0.08, -0.09, -0.10

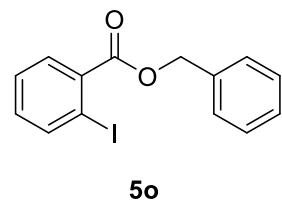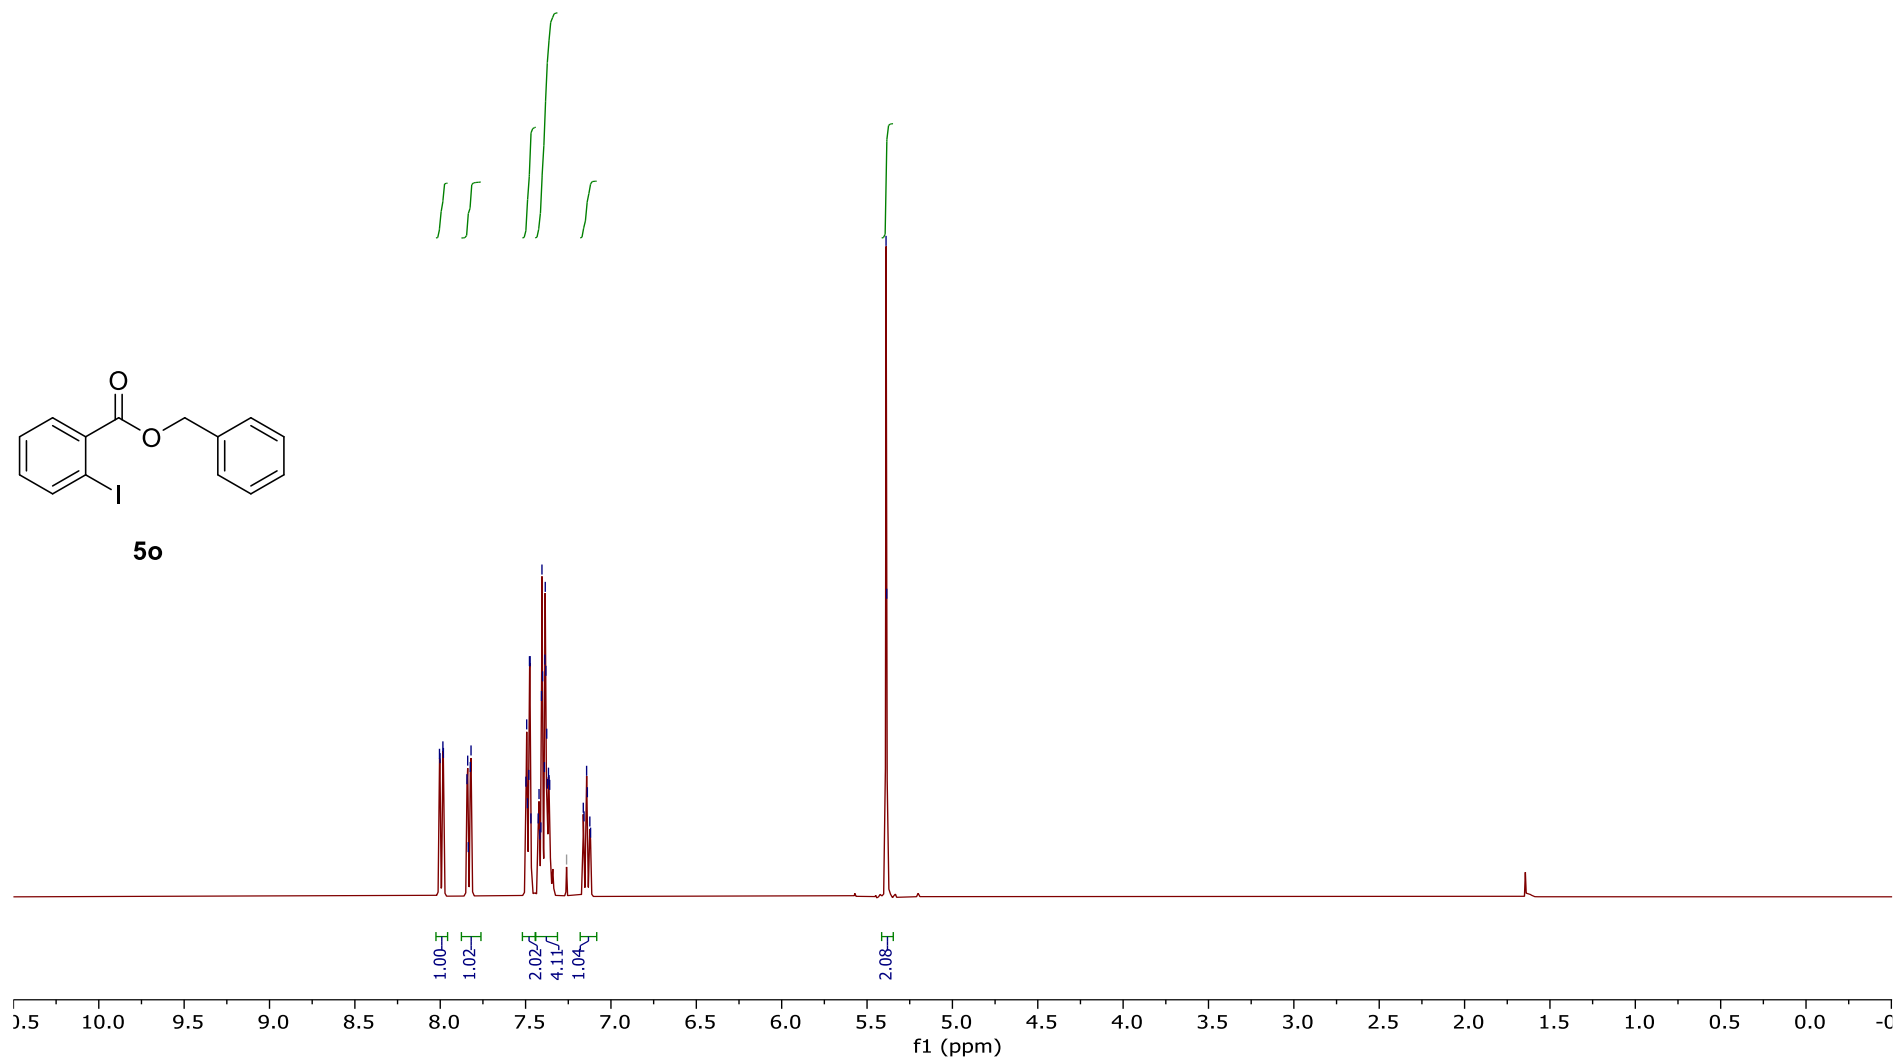



30103204.11.1.1r  
SLC:LNB:LB-001-89-PURIFY-PROTON  
Carbon.dur CDCl3 /home/nmr/localdata/alkup 4

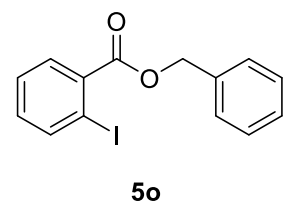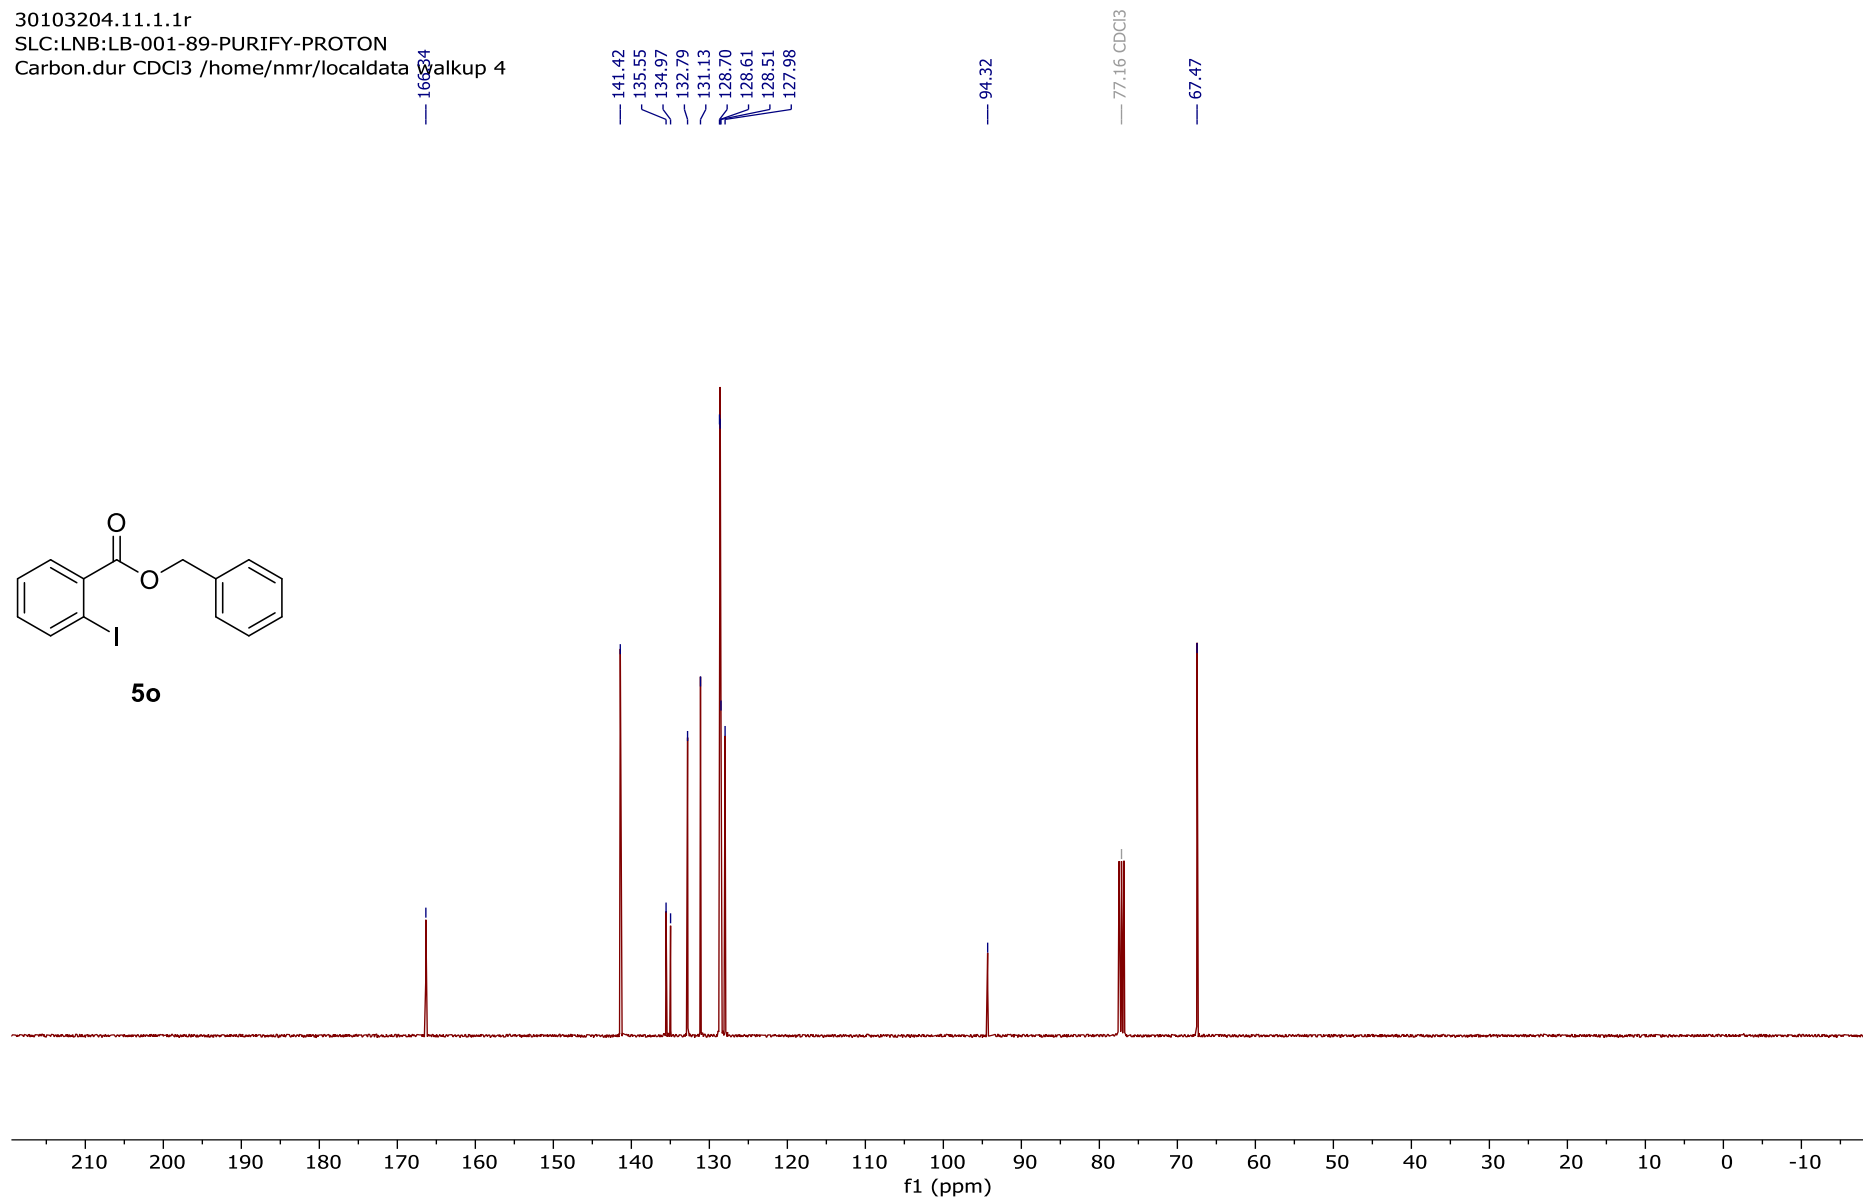

09163850.10.1.1r

SLC:LNB:LB-001-FRAC16-17-18

Proton. 1H NMR (400 MHz, CDCl3) of 5p

8.28, 8.27, 8.26, 8.25, 8.24, 8.23, 8.22, 8.21, 8.20, 8.19, 8.18, 8.17, 8.16, 8.15, 8.14, 8.13, 8.12, 8.11, 8.10, 8.09, 8.08, 8.07, 8.06, 8.05, 8.04, 8.03, 8.02, 8.01, 8.00, 7.99, 7.98, 7.97, 7.96, 7.95, 7.94, 7.93, 7.92, 7.91, 7.90, 7.89, 7.88, 7.87, 7.86, 7.85, 7.84, 7.83, 7.82, 7.81, 7.80, 7.79, 7.78, 7.77, 7.76, 7.75, 7.74, 7.73, 7.72, 7.71, 7.70, 7.69, 7.68, 7.67, 7.66, 7.65, 7.64, 7.63, 7.62, 7.61, 7.60, 7.59, 7.58, 7.57, 7.56, 7.55, 7.54, 7.53, 7.52, 7.51, 7.50, 7.49, 7.48, 7.47, 7.46, 7.45, 7.44, 7.43, 7.42, 7.41, 7.40, 7.39, 7.38, 7.37, 7.36, 7.35, 7.34, 7.33, 7.32, 7.31, 7.30, 7.29, 7.28, 7.27, 7.26, 7.25, 7.24, 7.23, 7.22, 7.21, 7.20, 7.19, 7.18, 7.17, 7.16, 7.15, 7.14, 7.13, 7.12, 7.11, 7.10, 7.09, 7.08, 7.07, 7.06, 7.05, 7.04, 7.03, 7.02, 7.01, 7.00, 6.99, 6.98

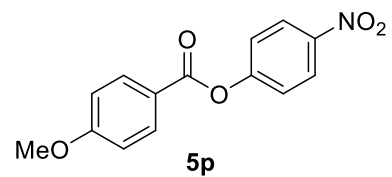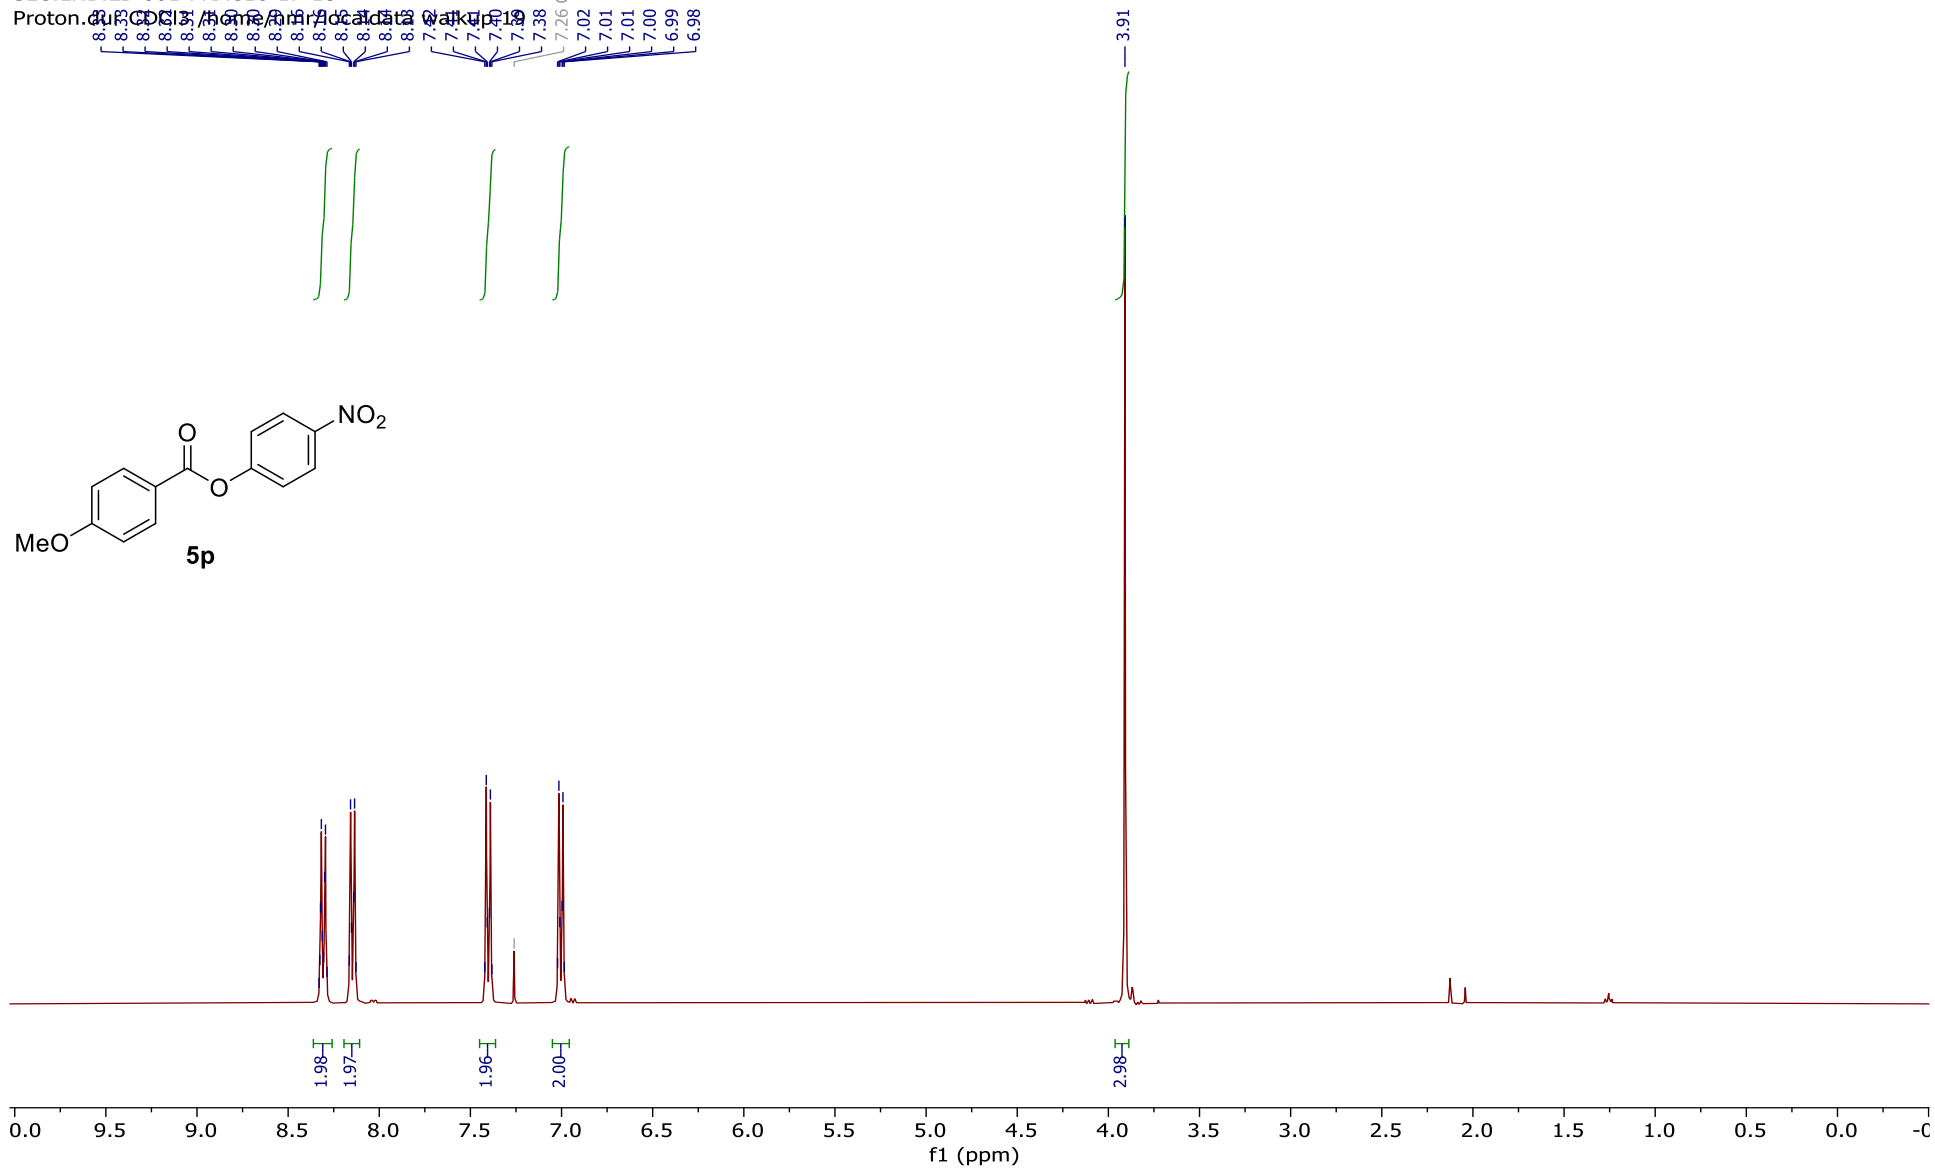

S-58

09163850.14.1.1r  
SLC:LNB:LB-001-FRAC16-17-18  
Carbon.dur CDCl3 /home/nmr/localdata

166.33  
166.34  
156.15

145.37

132.65

125.34

122.79

120.82

114.20

77.16 CDCl3

55.72

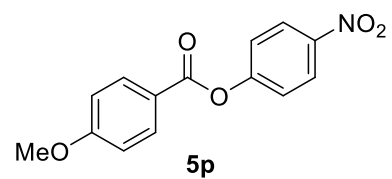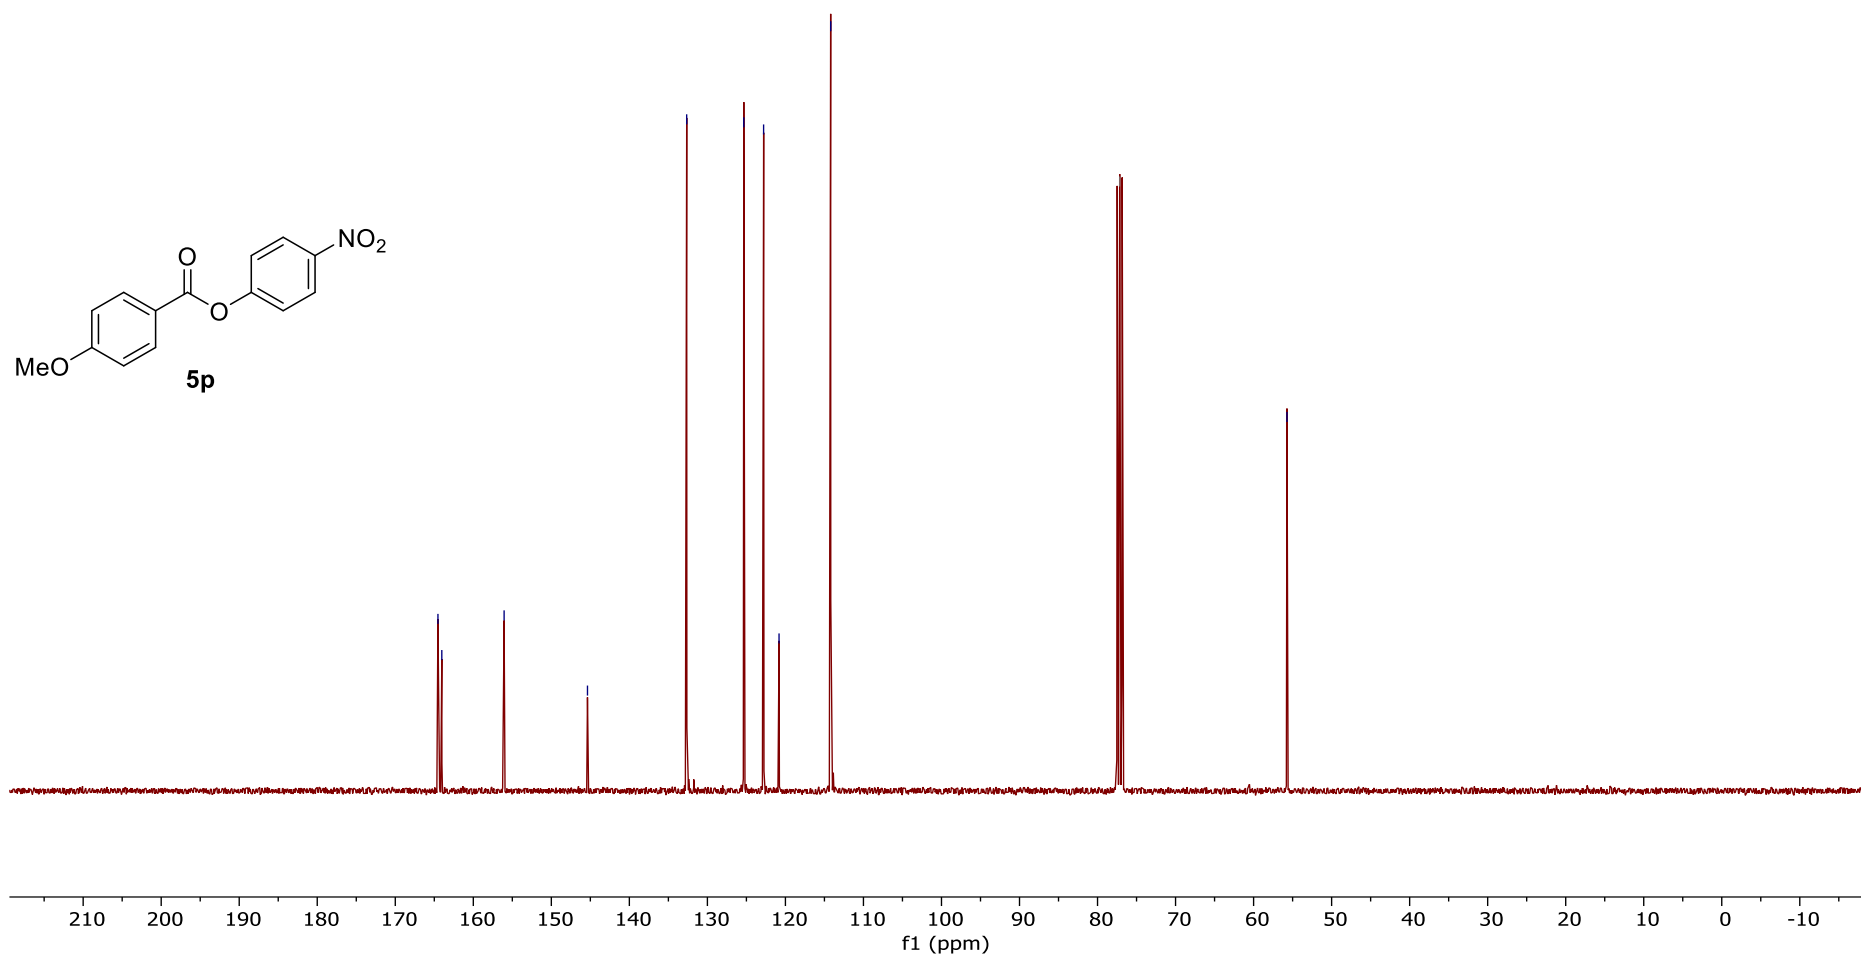

02163815.10.1.1r  
SLC:LNB:LB-001-58B  
Proton1.icon CDCl3

Typo- Should read 48B

8.07, 8.06, 8.05, 8.04, 8.03, 8.02, 8.01, 7.76, 7.75, 7.74, 7.73, 7.72, 7.71, 7.70, 7.69, 7.68, 7.67, 7.66, 7.65, 7.64, 7.63, 7.62, 7.61, 7.60, 7.59, 7.58, 7.57, 7.56, 7.55, 7.54, 7.53, 7.52, 7.51, 7.50, 7.49, 7.48, 7.47, 7.46, 7.45, 7.44, 7.43, 7.42, 7.41, 7.40, 7.39, 7.38, 7.37, 7.36, 7.35, 7.34, 7.33, 7.32, 7.31, 7.30, 7.29, 7.28, 7.27, 7.26, 7.25, 7.24, 7.23, 7.22, 7.21, 7.20, 7.19, 7.18, 7.17, 7.16, 7.15, 7.14, 7.13, 7.12, 7.11, 7.10, 7.09, 7.08, 7.07, 7.06, 7.05, 7.04, 7.03, 7.02, 7.01, 7.00, 6.99, 6.98, 6.97, 6.96, 6.95, 6.94, 6.93, 6.92, 3.82

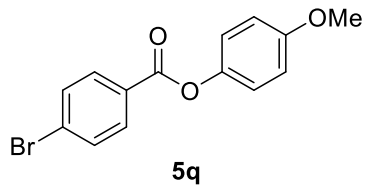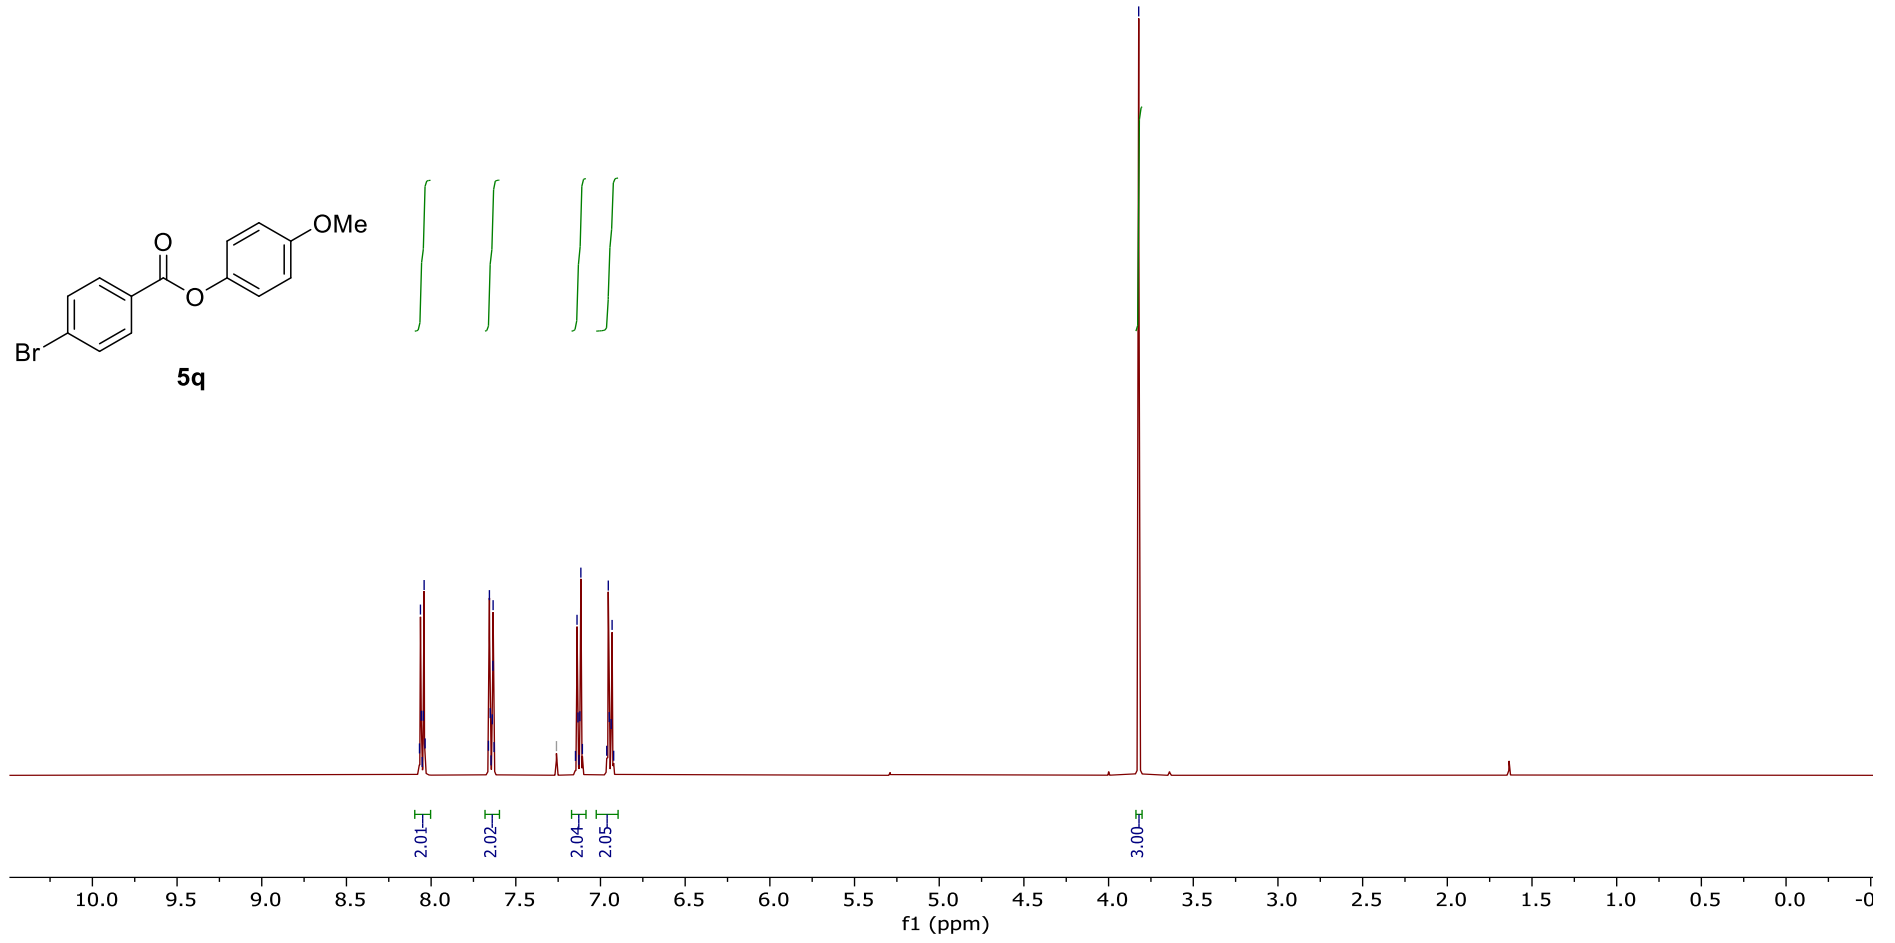

02163815.11.1.1r  
SLC:LNB:LB-001-58B  
Carbon.dur CDCI3 /home/nmr/localdata/backup

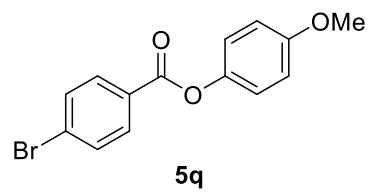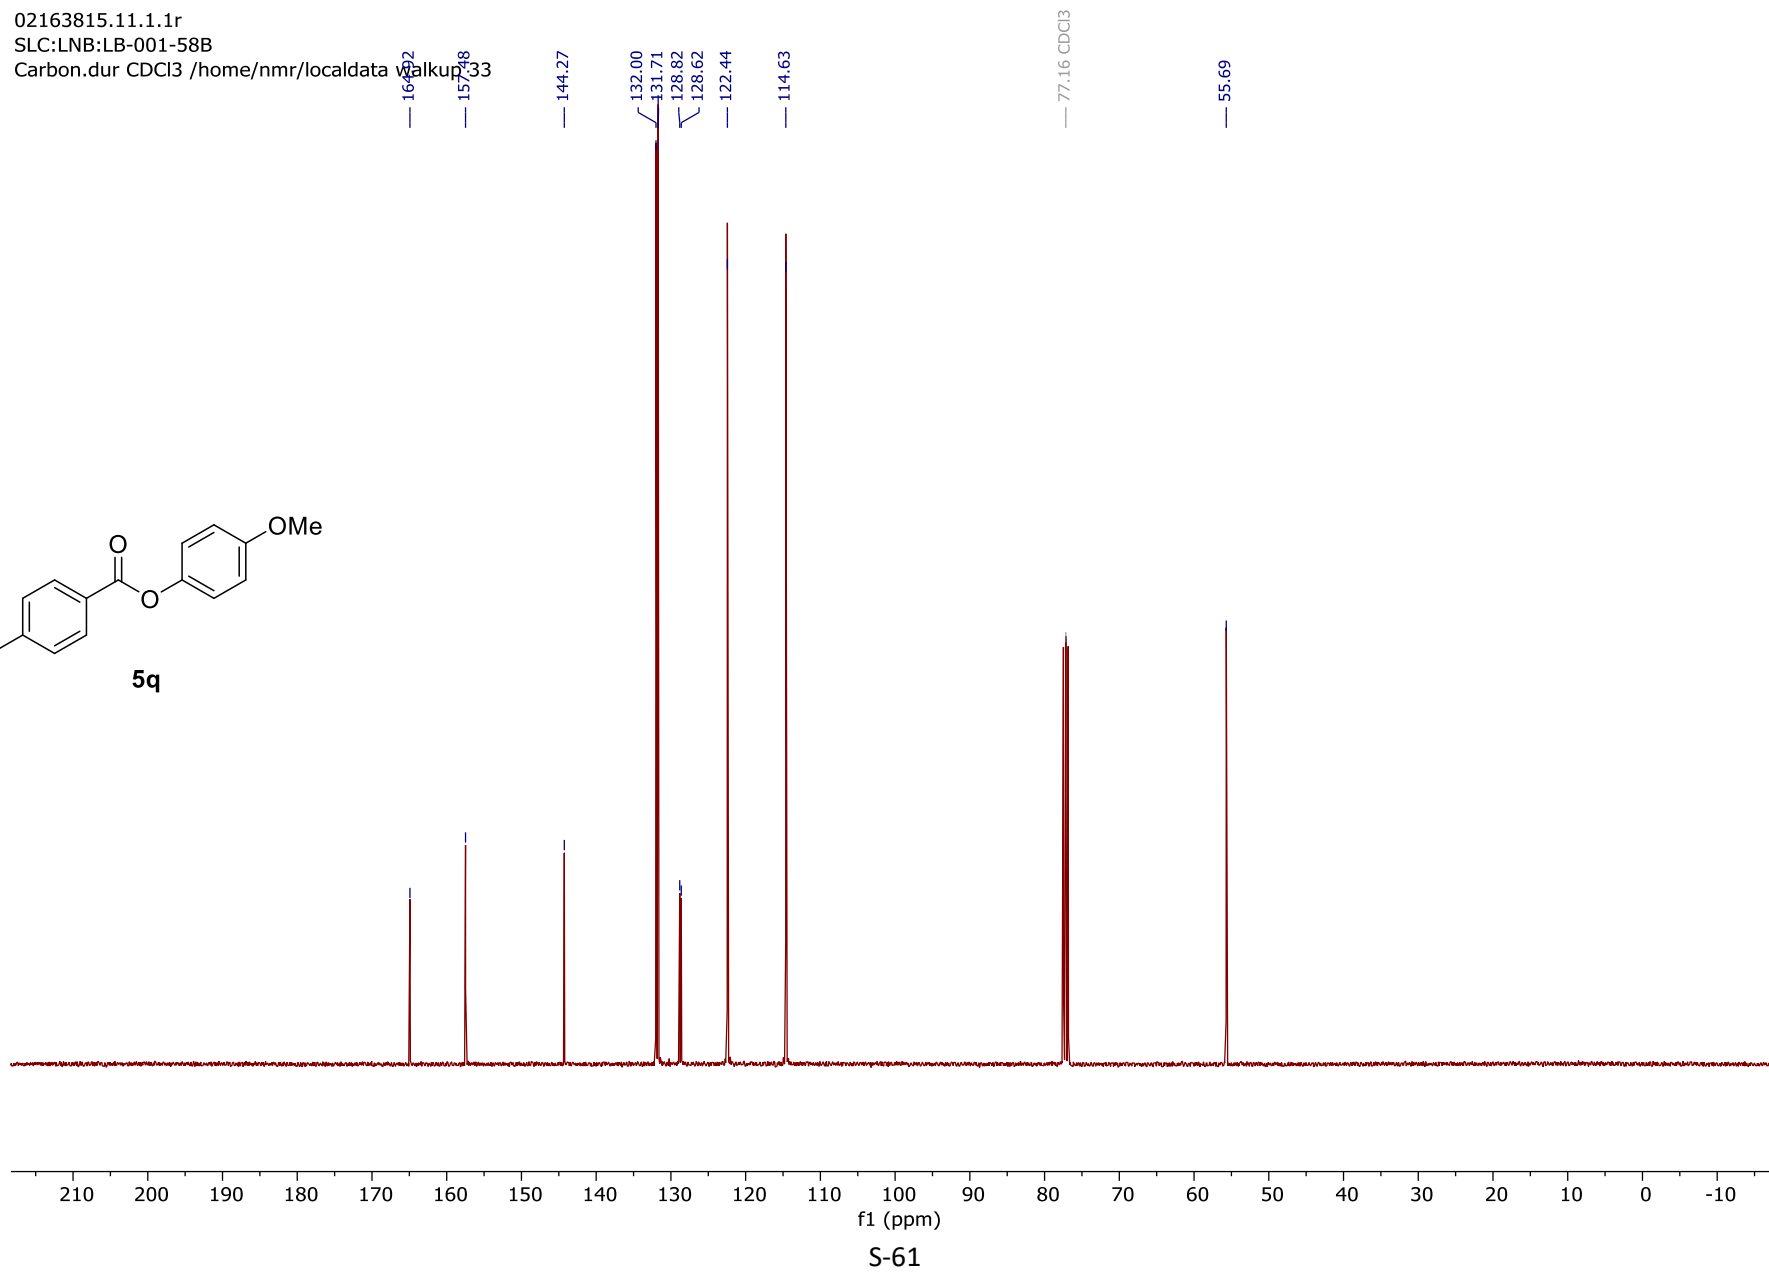

01153629.10.1.1r  
SLC:LNB:LB-001-37B(2)

Proton1.icon CDCl3 /home/nmr/local/data/

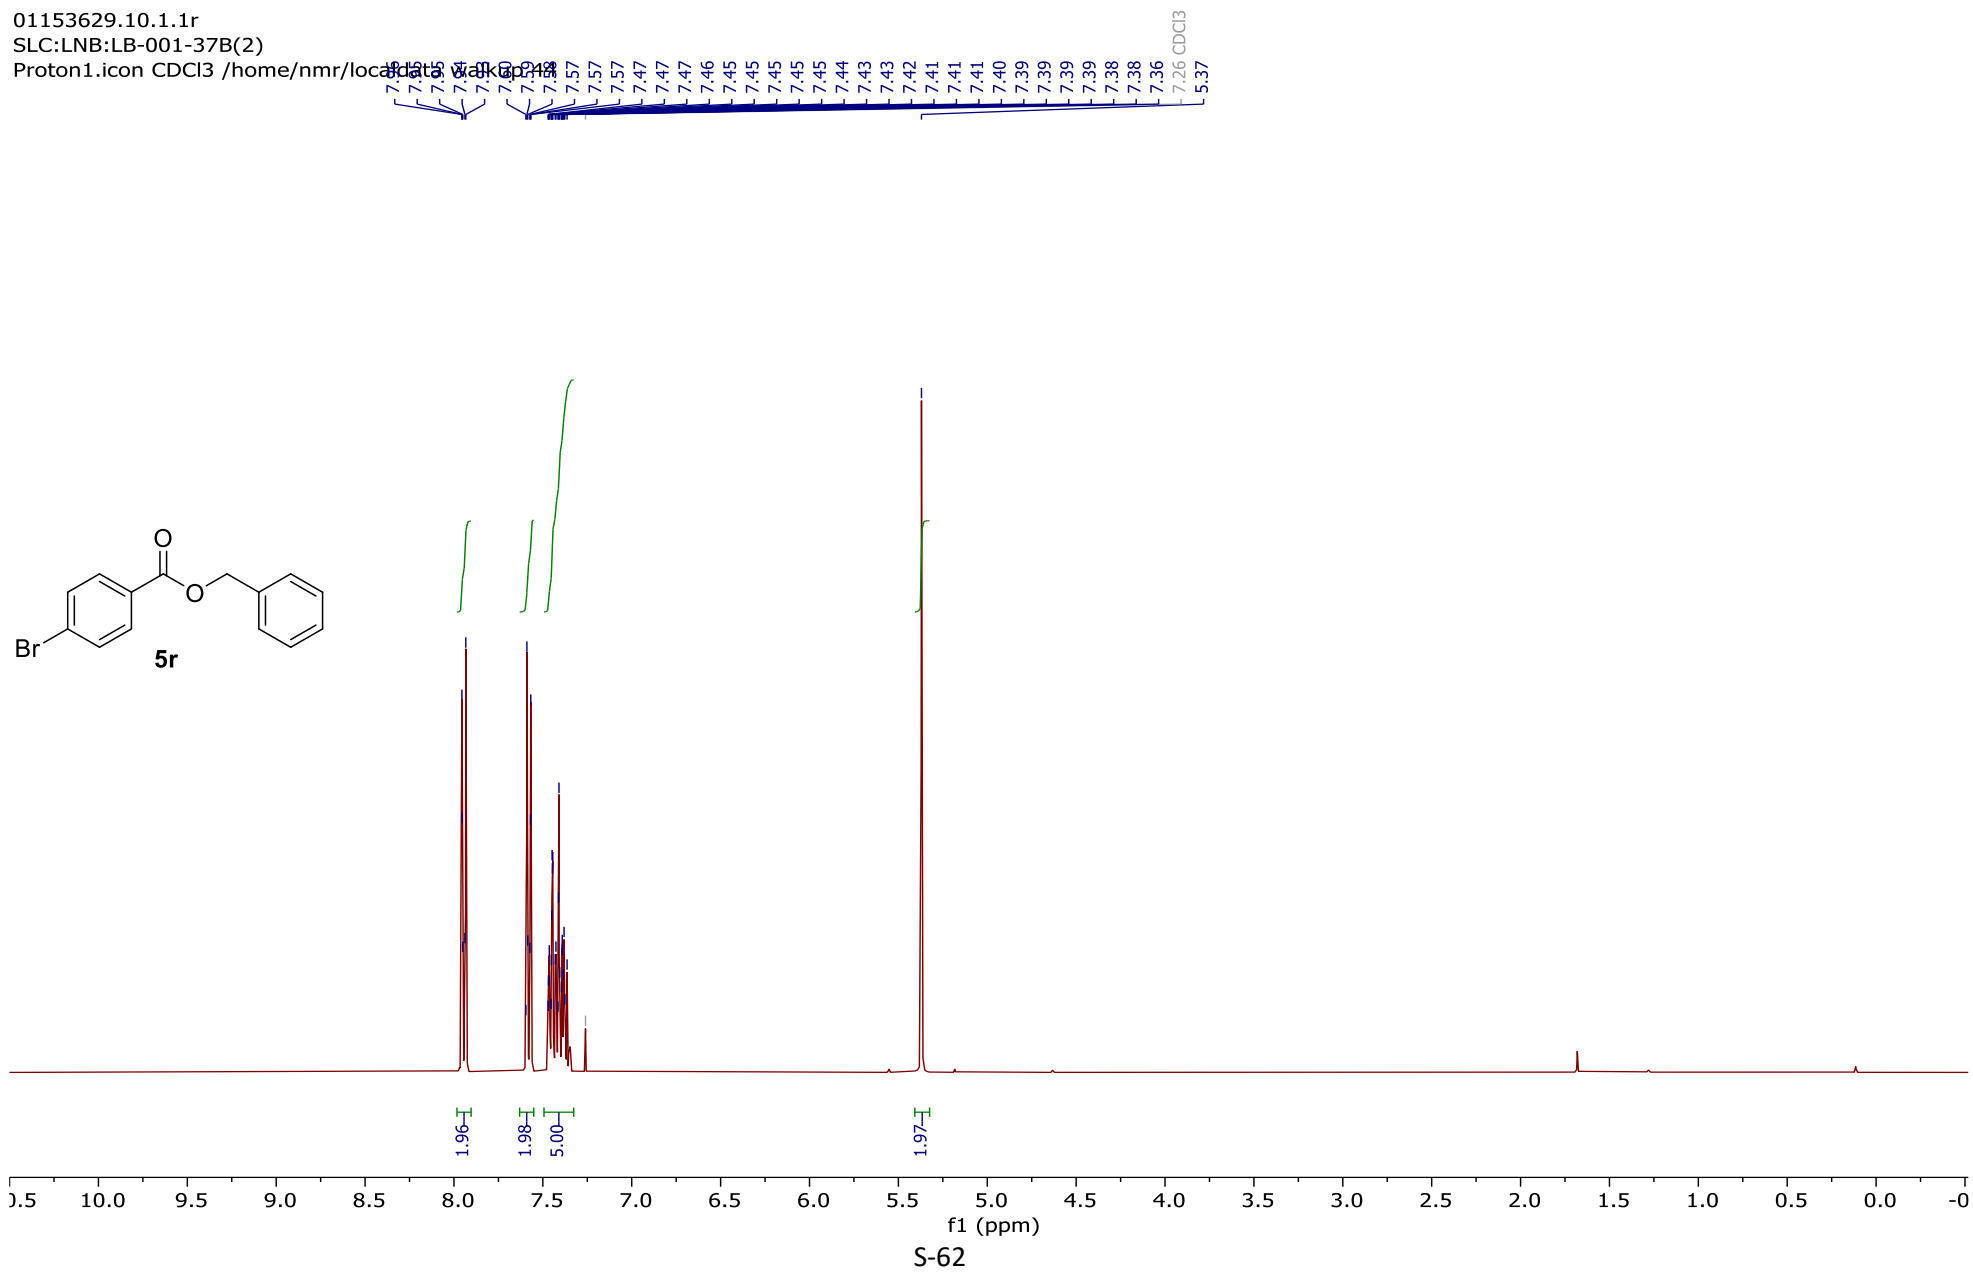

01153629.11.1.1r  
SLC:LNB:LB-001-37B(2)  
Carbon.dur CDCl3 /home/nmr/localdata/alkup 44

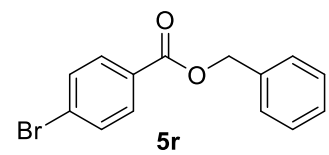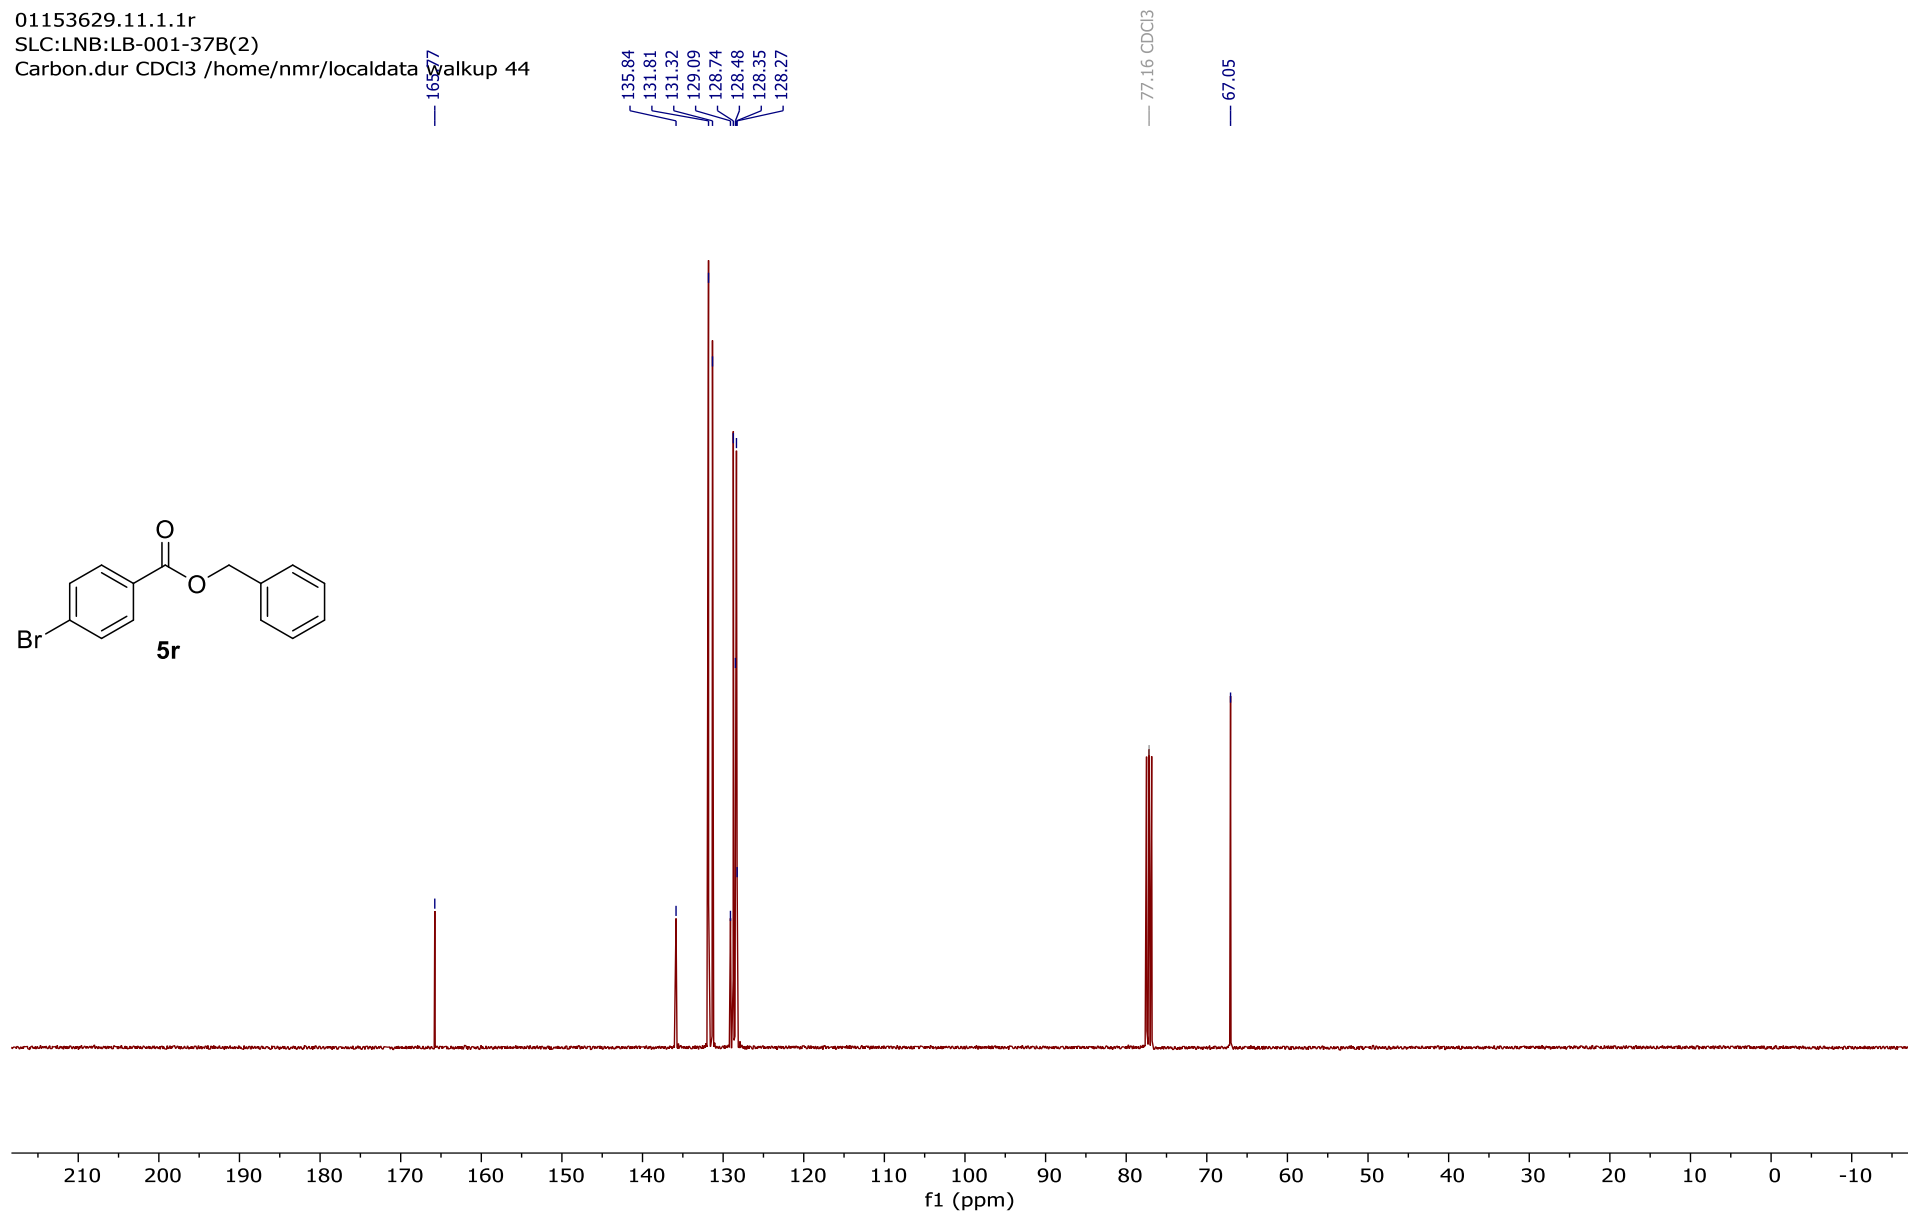

09163920.10.1.1r  
SLC:LNB:LB-001-FRAC32  
Proton.dur CDCl3

8.18, 8.17, 8.16, 8.15, 8.14, 8.13, 8.12, 8.11, 8.10, 8.09, 8.08, 8.07, 8.06, 8.05, 8.04, 8.03, 8.02, 8.01, 7.99, 7.98, 7.97, 7.96, 7.95, 7.94, 7.93, 7.92, 7.91, 7.90, 7.89, 7.88, 7.87, 7.86, 7.85, 7.84, 7.83, 7.82, 7.81, 7.80, 7.79, 7.78, 7.77, 7.76, 7.75, 7.74, 7.73, 7.72, 7.71, 7.70, 7.69, 7.68, 7.67, 7.66, 7.65, 7.64, 7.63, 7.62, 7.61, 7.60, 7.59, 7.58, 7.57, 7.56, 7.55, 7.54, 7.53, 7.52, 7.51, 7.50, 7.49, 7.48, 7.47, 7.46, 7.45, 7.44, 7.43, 7.42, 7.41, 7.40, 7.39, 7.38, 7.37, 7.36, 7.35, 7.34, 7.33, 7.32, 7.31, 7.30, 7.29, 7.28, 7.27, 7.26, 7.25, 7.24, 7.23, 7.22, 7.21, 7.20, 7.19, 7.18, 7.17, 7.16, 7.15, 7.14, 7.13, 7.12, 7.11, 7.10, 7.09, 7.08, 7.07, 7.06, 7.05, 7.04, 7.03, 7.02, 7.01, 7.00, 6.99, 6.98, 6.97, 6.96, 6.95, 6.94, 6.93, 6.92, 6.91, 6.90, 6.89, 6.88, 6.87, 6.86, 6.85, 6.84, 6.83, 6.82, 6.81, 6.80, 6.79, 6.78, 6.77, 6.76, 6.75, 6.74, 6.73, 6.72, 6.71, 6.70, 6.69, 6.68, 6.67, 6.66, 6.65, 6.64, 6.63, 6.62, 6.61, 6.60, 6.59, 6.58, 6.57, 6.56, 6.55, 6.54, 6.53, 6.52, 6.51, 6.50, 6.49, 6.48, 6.47, 6.46, 6.45, 6.44, 6.43, 6.42, 6.41, 6.40, 6.39, 6.38, 6.37, 6.36, 6.35, 6.34, 6.33, 6.32, 6.31, 6.30, 6.29, 6.28, 6.27, 6.26, 6.25, 6.24, 6.23, 6.22, 6.21, 6.20, 6.19, 6.18, 6.17, 6.16, 6.15, 6.14, 6.13, 6.12, 6.11, 6.10, 6.09, 6.08, 6.07, 6.06, 6.05, 6.04, 6.03, 6.02, 6.01, 6.00, 5.99, 5.98, 5.97, 5.96, 5.95, 5.94, 5.93, 5.92, 5.91, 5.90, 5.89, 5.88, 5.87, 5.86, 5.85, 5.84, 5.83, 5.82, 5.81, 5.80, 5.79, 5.78, 5.77, 5.76, 5.75, 5.74, 5.73, 5.72, 5.71, 5.70, 5.69, 5.68, 5.67, 5.66, 5.65, 5.64, 5.63, 5.62, 5.61, 5.60, 5.59, 5.58, 5.57, 5.56, 5.55, 5.54, 5.53, 5.52, 5.51, 5.50, 5.49, 5.48, 5.47, 5.46, 5.45, 5.44, 5.43, 5.42, 5.41, 5.40, 5.39, 5.38, 5.37, 5.36, 5.35, 5.34, 5.33, 5.32, 5.31, 5.30, 5.29, 5.28, 5.27, 5.26, 5.25, 5.24, 5.23, 5.22, 5.21, 5.20, 5.19, 5.18, 5.17, 5.16, 5.15, 5.14, 5.13, 5.12, 5.11, 5.10, 5.09, 5.08, 5.07, 5.06, 5.05, 5.04, 5.03, 5.02, 5.01, 5.00, 4.99, 4.98, 4.97, 4.96, 4.95, 4.94, 4.93, 4.92, 4.91, 4.90, 4.89, 4.88, 4.87, 4.86, 4.85, 4.84, 4.83, 4.82, 4.81, 4.80, 4.79, 4.78, 4.77, 4.76, 4.75, 4.74, 4.73, 4.72, 4.71, 4.70, 4.69, 4.68, 4.67, 4.66, 4.65, 4.64, 4.63, 4.62, 4.61, 4.60, 4.59, 4.58, 4.57, 4.56, 4.55, 4.54, 4.53, 4.52, 4.51, 4.50, 4.49, 4.48, 4.47, 4.46, 4.45, 4.44, 4.43, 4.42, 4.41, 4.40, 4.39, 4.38, 4.37, 4.36, 4.35, 4.34, 4.33, 4.32, 4.31, 4.30, 4.29, 4.28, 4.27, 4.26, 4.25, 4.24, 4.23, 4.22, 4.21, 4.20, 4.19, 4.18, 4.17, 4.16, 4.15, 4.14, 4.13, 4.12, 4.11, 4.10, 4.09, 4.08, 4.07, 4.06, 4.05, 4.04, 4.03, 4.02, 4.01, 4.00, 3.99, 3.98, 3.97, 3.96, 3.95, 3.94, 3.93, 3.92, 3.91, 3.90, 3.89, 3.88, 3.87, 3.86, 3.85, 3.84, 3.83, 3.82, 3.81, 3.80, 3.79, 3.78, 3.77, 3.76, 3.75, 3.74, 3.73, 3.72, 3.71, 3.70, 3.69, 3.68, 3.67, 3.66, 3.65, 3.64, 3.63, 3.62, 3.61, 3.60, 3.59, 3.58, 3.57, 3.56, 3.55, 3.54, 3.53, 3.52, 3.51, 3.50, 3.49, 3.48, 3.47, 3.46, 3.45, 3.44, 3.43, 3.42, 3.41, 3.40, 3.39, 3.38, 3.37, 3.36, 3.35, 3.34, 3.33, 3.32, 3.31, 3.30, 3.29, 3.28, 3.27, 3.26, 3.25, 3.24, 3.23, 3.22, 3.21, 3.20, 3.19, 3.18, 3.17, 3.16, 3.15, 3.14, 3.13, 3.12, 3.11, 3.10, 3.09, 3.08, 3.07, 3.06, 3.05, 3.04, 3.03, 3.02, 3.01, 3.00, 2.99, 2.98, 2.97, 2.96, 2.95, 2.94, 2.93, 2.92, 2.91, 2.90, 2.89, 2.88, 2.87, 2.86, 2.85, 2.84, 2.83, 2.82, 2.81, 2.80, 2.79, 2.78, 2.77, 2.76, 2.75, 2.74, 2.73, 2.72, 2.71, 2.70, 2.69, 2.68, 2.67, 2.66, 2.65, 2.64, 2.63, 2.62, 2.61, 2.60, 2.59, 2.58, 2.57, 2.56, 2.55, 2.54, 2.53, 2.52, 2.51, 2.50, 2.49, 2.48, 2.47, 2.46, 2.45, 2.44, 2.43, 2.42, 2.41, 2.40, 2.39, 2.38, 2.37, 2.36, 2.35, 2.34, 2.33, 2.32, 2.31, 2.30, 2.29, 2.28, 2.27, 2.26, 2.25, 2.24, 2.23, 2.22, 2.21, 2.20, 2.19, 2.18, 2.17, 2.16, 2.15, 2.14, 2.13, 2.12, 2.11, 2.10, 2.09, 2.08, 2.07, 2.06, 2.05, 2.04, 2.03, 2.02, 2.01, 2.00, 1.99, 1.98, 1.97, 1.96, 1.95, 1.94, 1.93, 1.92, 1.91, 1.90, 1.89, 1.88, 1.87, 1.86, 1.85, 1.84, 1.83, 1.82, 1.81, 1.80, 1.79, 1.78, 1.77, 1.76, 1.75, 1.74, 1.73, 1.72, 1.71, 1.70, 1.69, 1.68, 1.67, 1.66, 1.65, 1.64, 1.63, 1.62, 1.61, 1.60, 1.59, 1.58, 1.57, 1.56, 1.55, 1.54, 1.53, 1.52, 1.51, 1.50, 1.49, 1.48, 1.47, 1.46, 1.45, 1.44, 1.43, 1.42, 1.41, 1.40, 1.39, 1.38, 1.37, 1.36, 1.35, 1.34, 1.33, 1.32, 1.31, 1.30, 1.29, 1.28, 1.27, 1.26, 1.25, 1.24, 1.23, 1.22, 1.21, 1.20, 1.19, 1.18, 1.17, 1.16, 1.15, 1.14, 1.13, 1.12, 1.11, 1.10, 1.09, 1.08, 1.07, 1.06, 1.05, 1.04, 1.03, 1.02, 1.01, 1.00, 0.99, 0.98, 0.97, 0.96, 0.95, 0.94, 0.93, 0.92, 0.91, 0.90, 0.89, 0.88, 0.87, 0.86, 0.85, 0.84, 0.83, 0.82, 0.81, 0.80, 0.79, 0.78, 0.77, 0.76, 0.75, 0.74, 0.73, 0.72, 0.71, 0.70, 0.69, 0.68, 0.67, 0.66, 0.65, 0.64, 0.63, 0.62, 0.61, 0.60, 0.59, 0.58, 0.57, 0.56, 0.55, 0.54, 0.53, 0.52, 0.51, 0.50, 0.49, 0.48, 0.47, 0.46, 0.45, 0.44, 0.43, 0.42, 0.41, 0.40, 0.39, 0.38, 0.37, 0.36, 0.35, 0.34, 0.33, 0.32, 0.31, 0.30, 0.29, 0.28, 0.27, 0.26, 0.25, 0.24, 0.23, 0.22, 0.21, 0.20, 0.19, 0.18, 0.17, 0.16, 0.15, 0.14, 0.13, 0.12, 0.11, 0.10, 0.09, 0.08, 0.07, 0.06, 0.05, 0.04, 0.03, 0.02, 0.01, 0.00, -0.01, -0.02, -0.03, -0.04, -0.05, -0.06, -0.07, -0.08, -0.09, -0.10, -0.11, -0.12, -0.13, -0.14, -0.15, -0.16, -0.17, -0.18, -0.19, -0.20, -0.21, -0.22, -0.23, -0.24, -0.25, -0.26, -0.27, -0.28, -0.29, -0.30, -0.31, -0.32, -0.33, -0.34, -0.35, -0.36, -0.37, -0.38, -0.39, -0.40, -0.41, -0.42, -0.43, -0.44, -0.45, -0.46, -0.47, -0.48, -0.49, -0.50

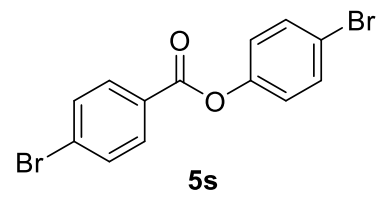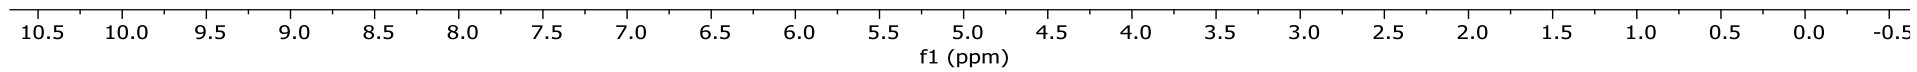



09163920.11.1.1r  
SLC:LNB:LB-001-FRAC32  
Carbon.dur CDCl3 /home/nmr/localdata/walk

166.81

148.89

132.73

132.17

131.80

129.25

128.19

123.56

119.32

77.16 CDCl3

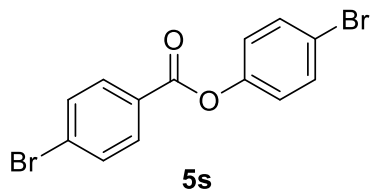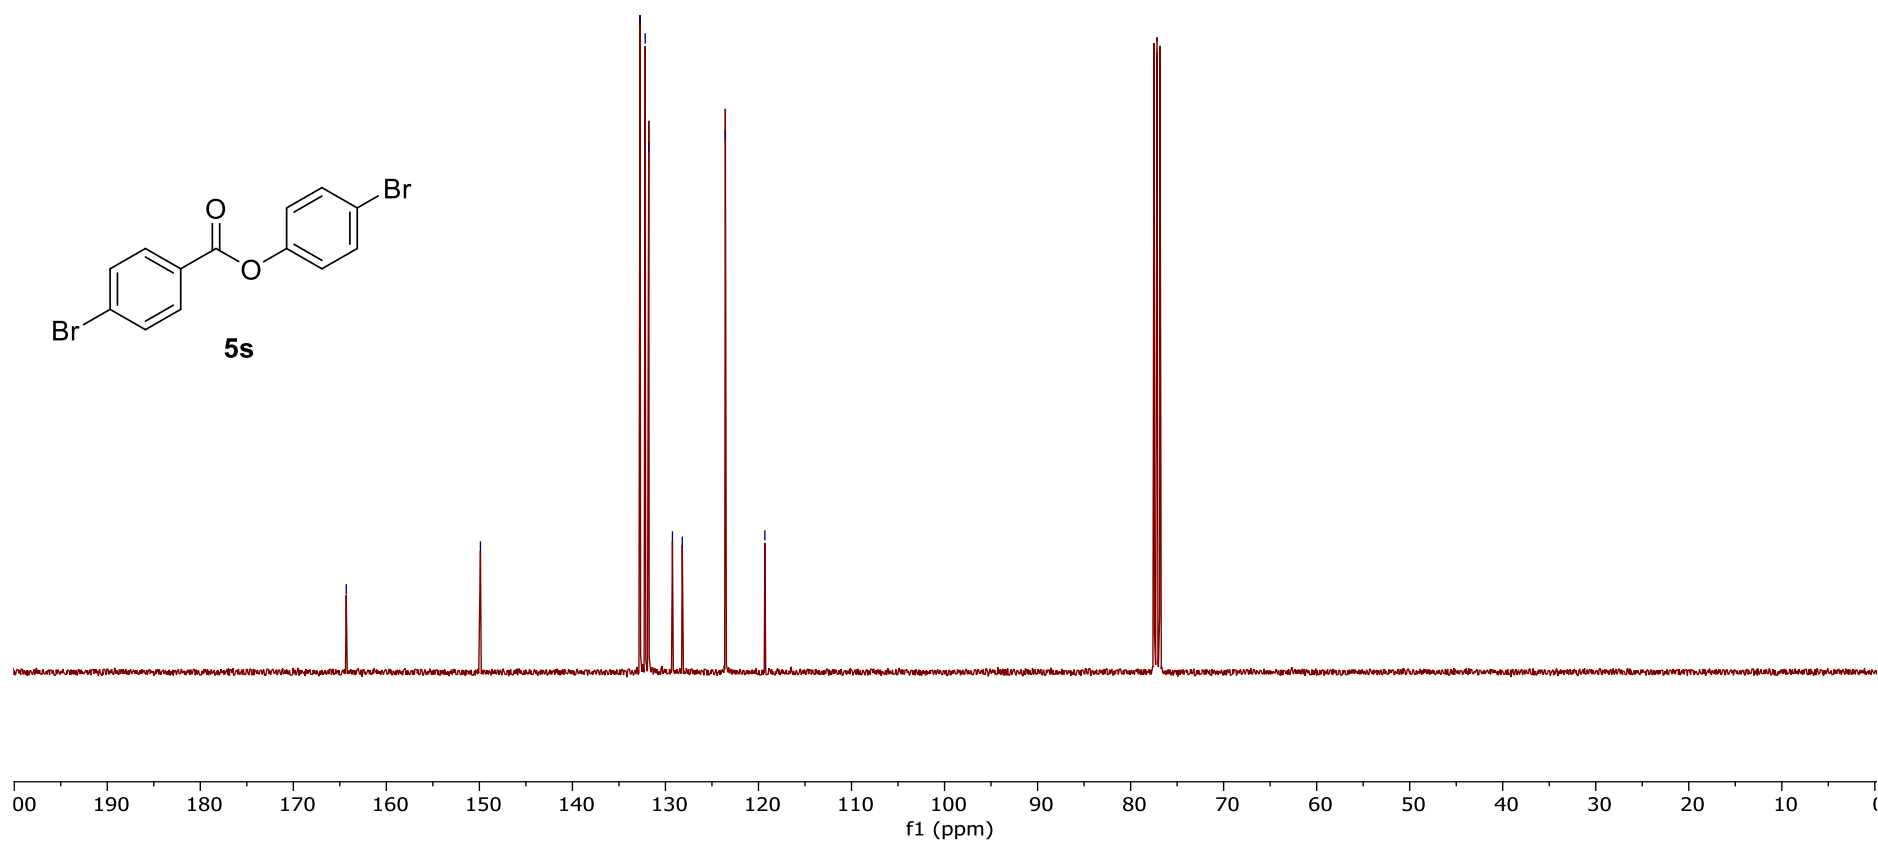

24165049.10.11  
SLC:LNB:LB-001-46A  
Proton1.icon CDCl3 /home/nmr/localdata/walkup/

2.61  
2.60  
2.58  
1.84  
1.82  
1.80  
1.78  
1.77  
1.52  
1.51  
1.50  
1.49  
1.48  
1.47  
1.46  
1.44  
1.43  
1.42  
1.41  
1.40  
1.38  
1.37  
1.36  
1.35  
1.32  
1.31  
0.97  
0.96  
0.95  
0.95  
0.93

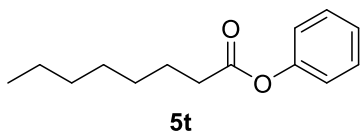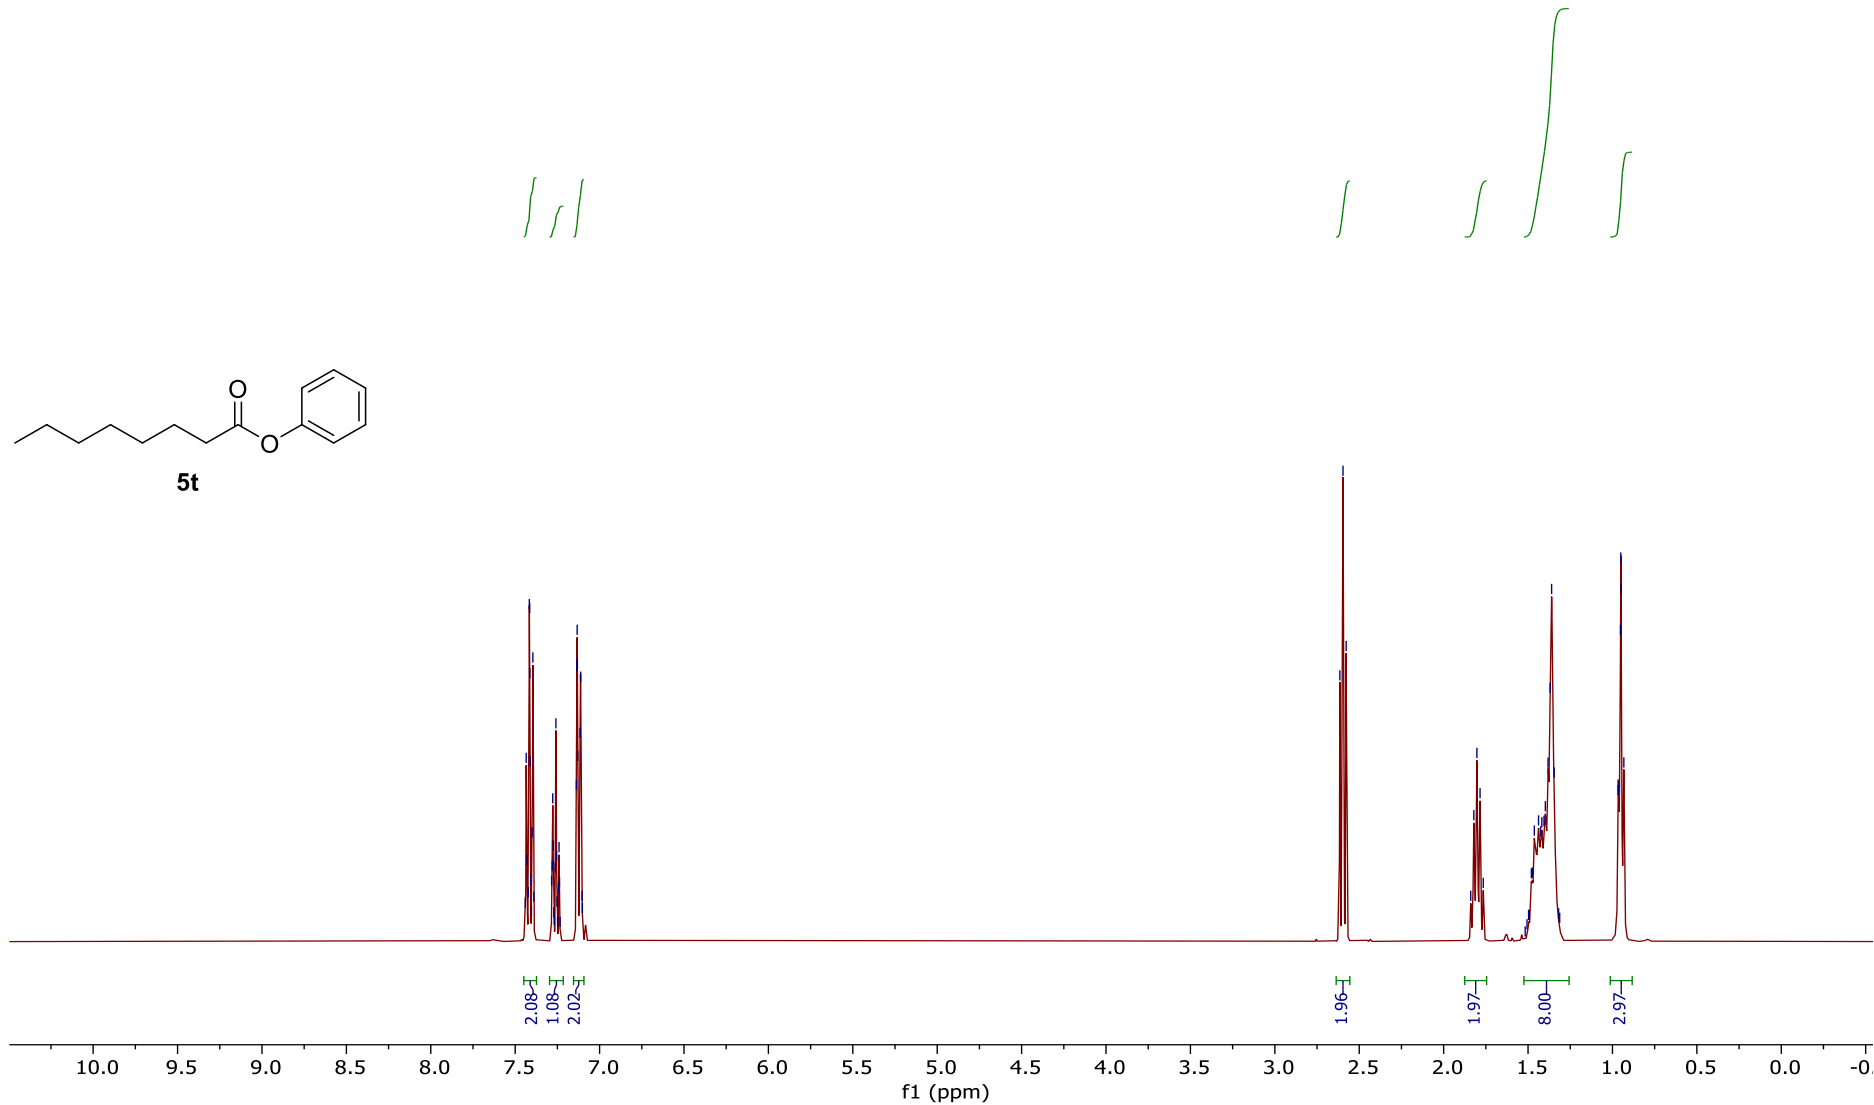

24165049.11.1.1r  
SLC:LNB:LB-001-46A  
Carbon.dur CDCl3 /home/nmr/localdata walkup

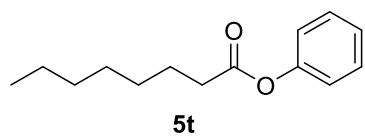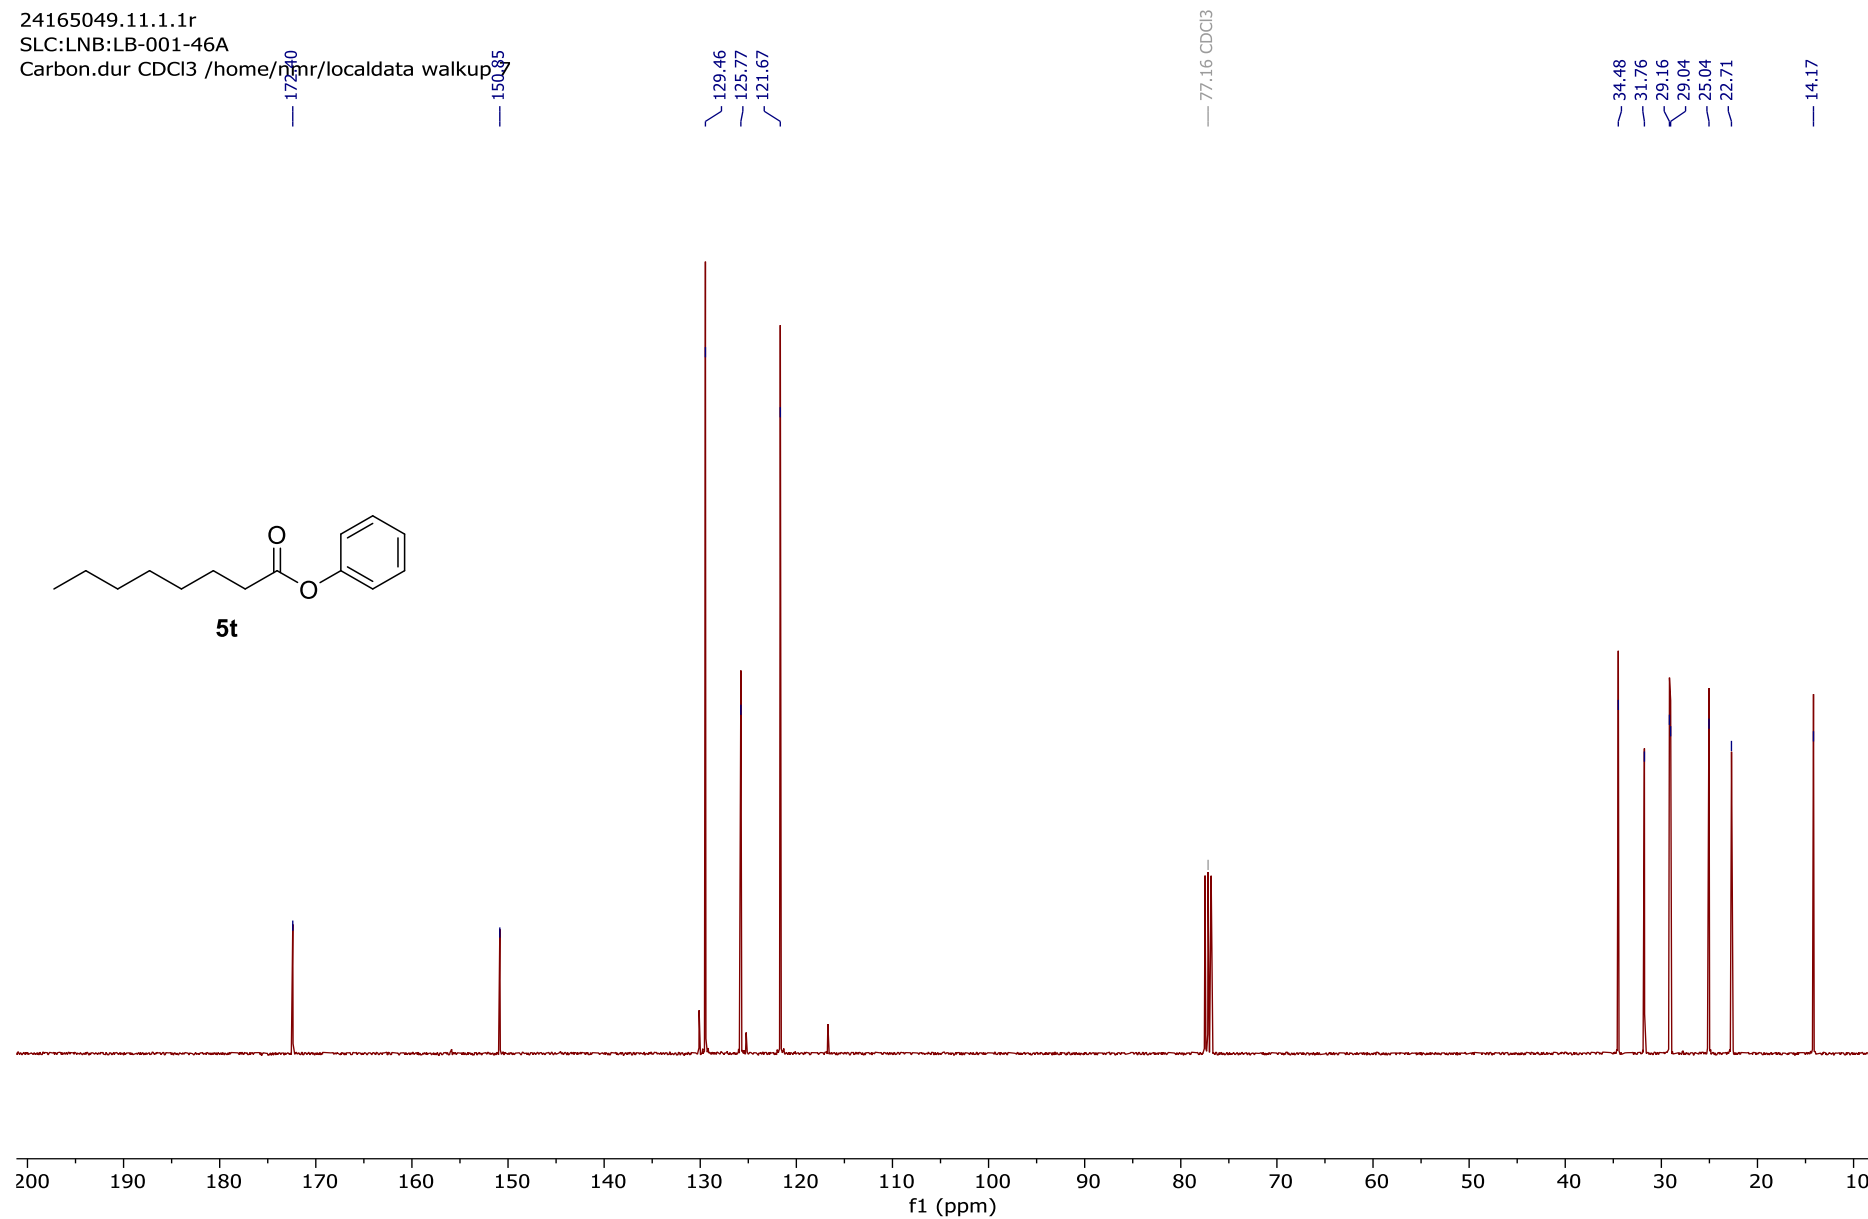

24172807.10.1.1r  
SLC:LNB:LB-001-46B-PURIFY  
Proton1.icon CDCl3 /home/nmr/local/

7.737  
7.736  
7.735  
7.734  
7.733  
7.733  
7.732  
7.731  
7.726 CDCl3

5.13

2.39  
2.37  
2.35  
1.71  
1.70  
1.68  
1.66  
1.66  
1.64  
1.62  
1.37  
1.36  
1.34  
1.34  
1.33  
1.32  
1.32  
1.31  
1.31  
1.31  
1.30  
1.30  
1.29  
1.28  
1.28  
1.28  
1.27  
1.27  
1.25  
0.93  
0.91  
0.90  
0.89  
0.89  
0.88

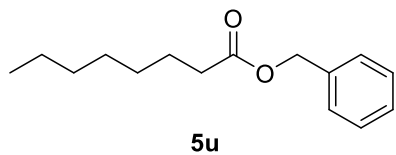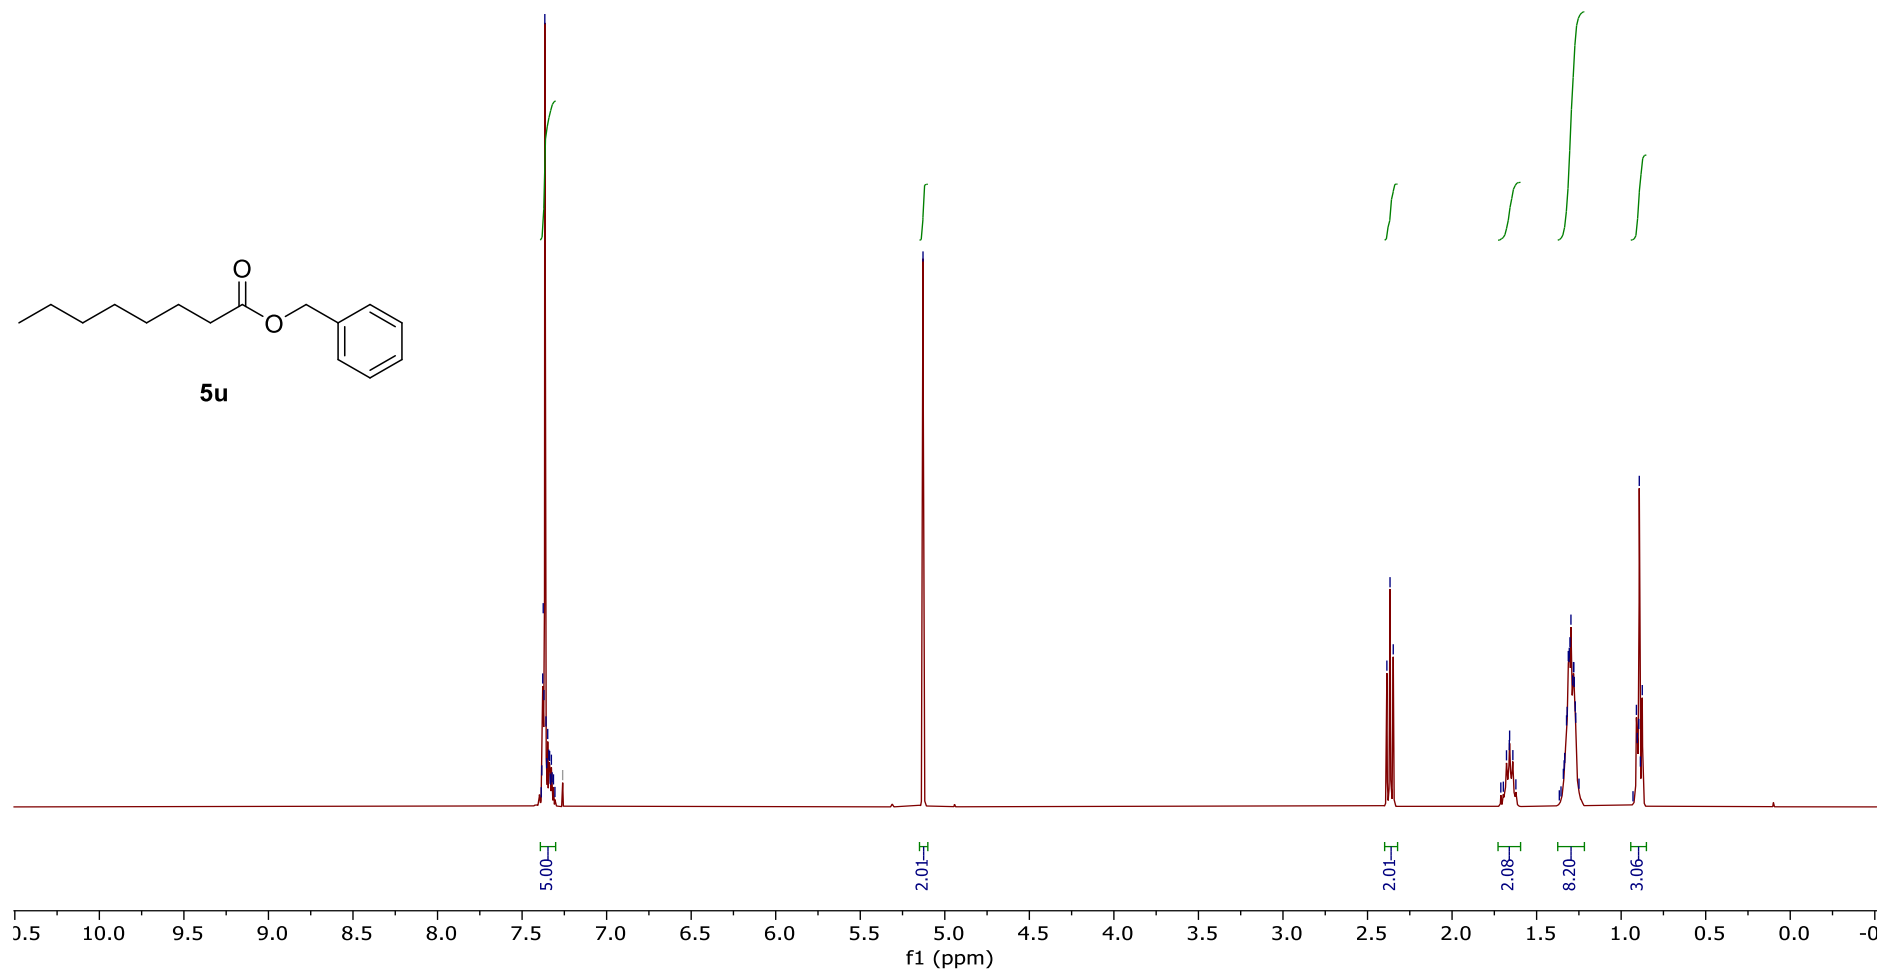

S-68

24172807.11.1.1r  
SLC:LNB:LB-001-46B-PURIFY  
Carbon.dur CDCl3 /home/nmr/local/data/walkup 6

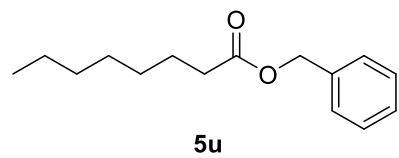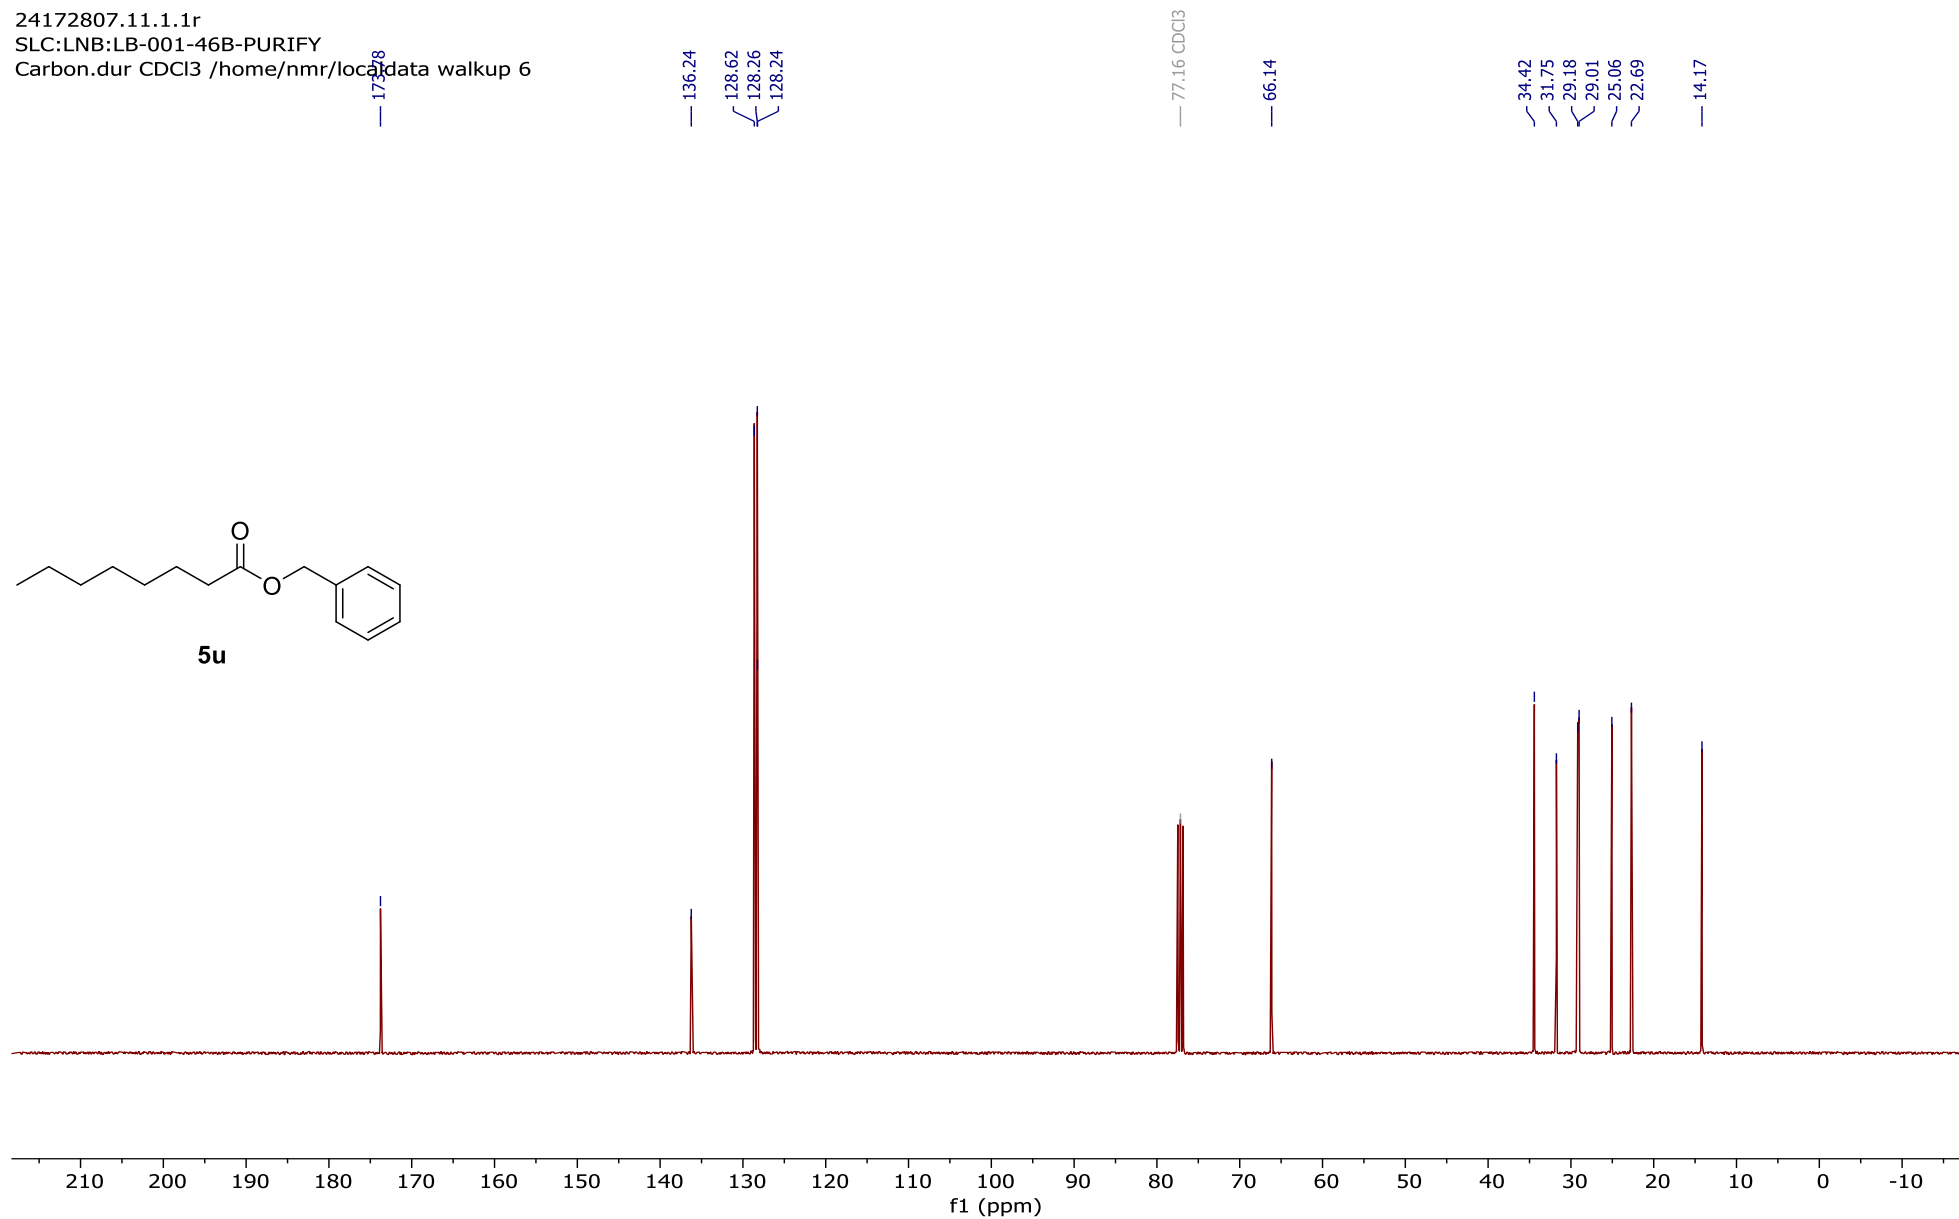

25142909.10.1.1r  
SLC:LNB:LB-001-132-PURIFY  
Proton1.icon CDCl3 /home/nmr/localdata/

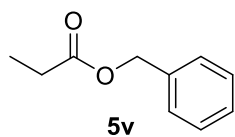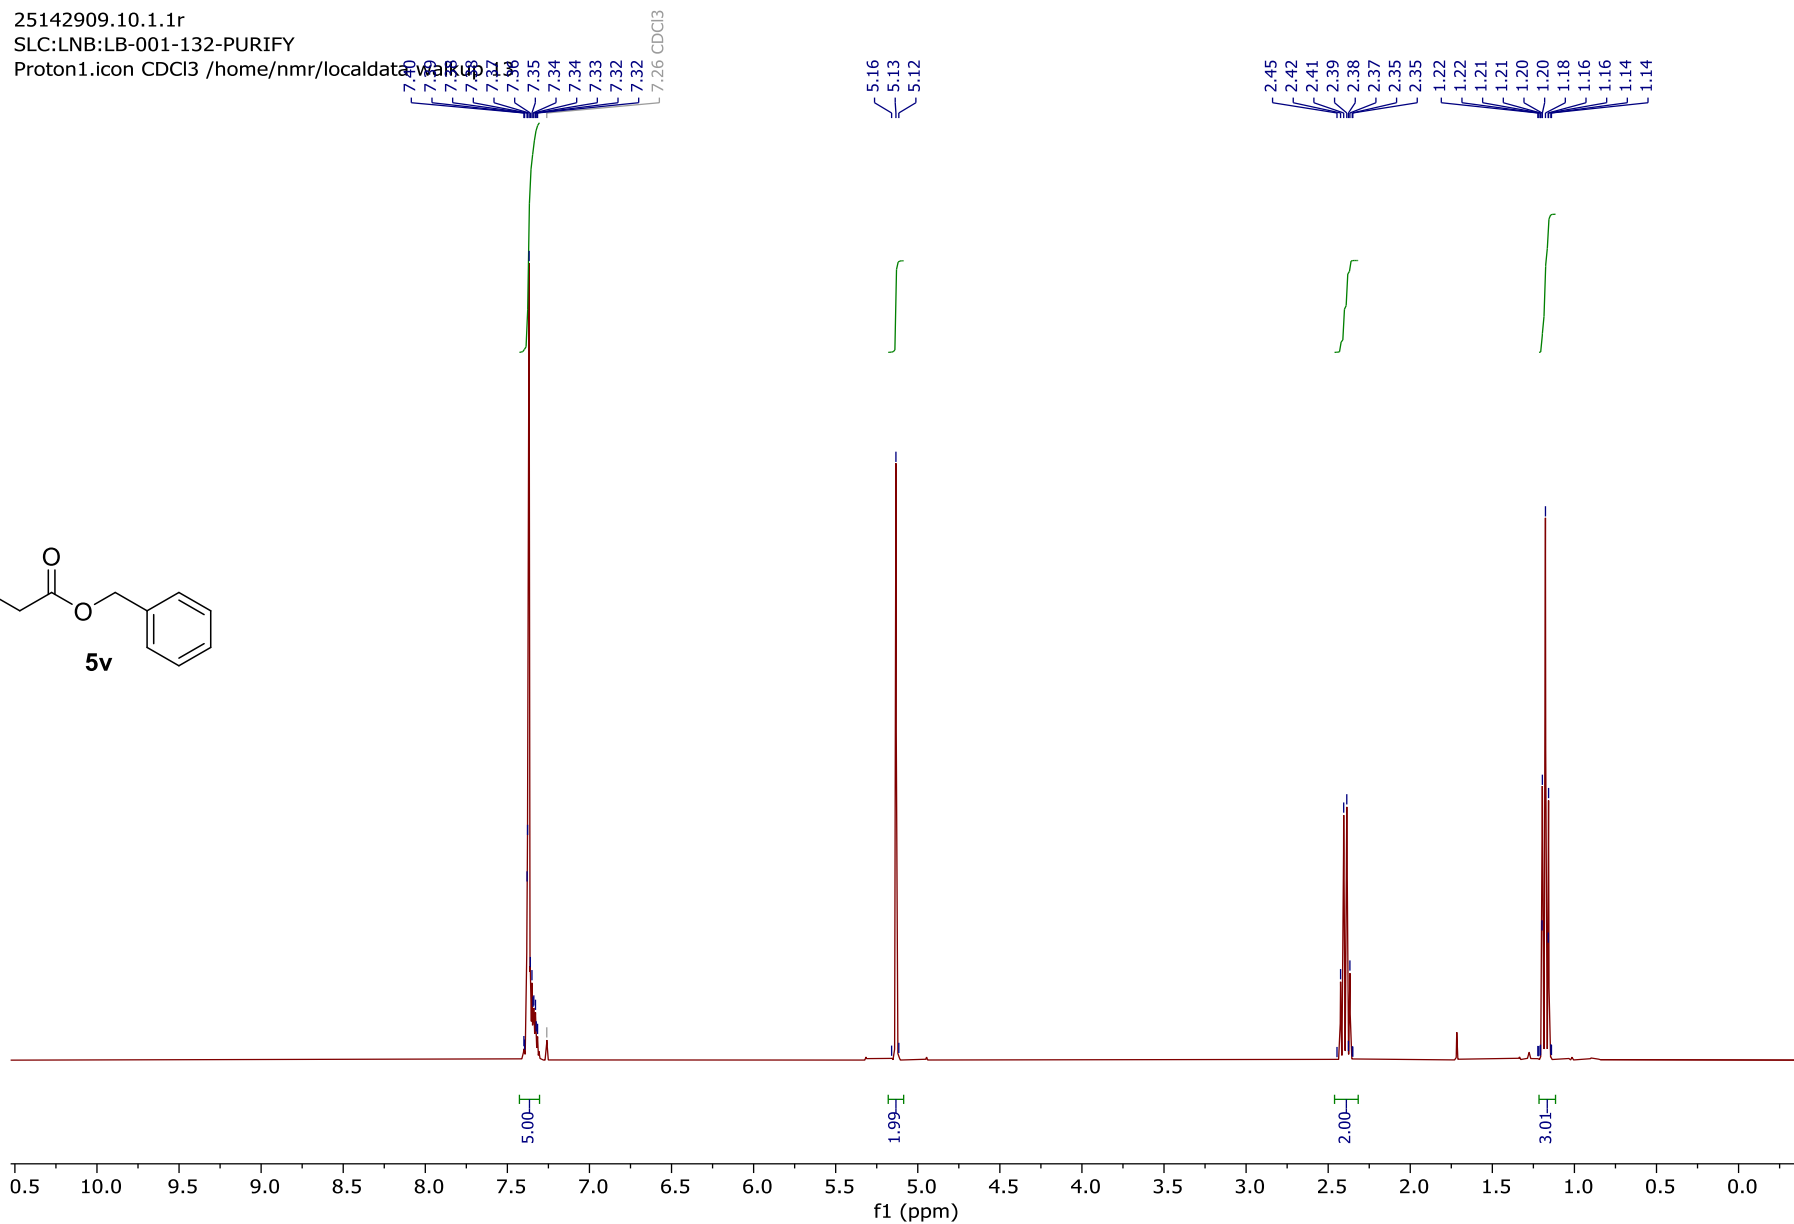

S-70

25142909.11.1.1r  
SLC:LNB:LB-001-132-PURIFY  
Carbon.dur CDCl3 /home/nmr/locdata walkup 13

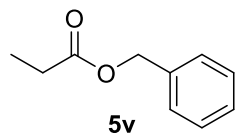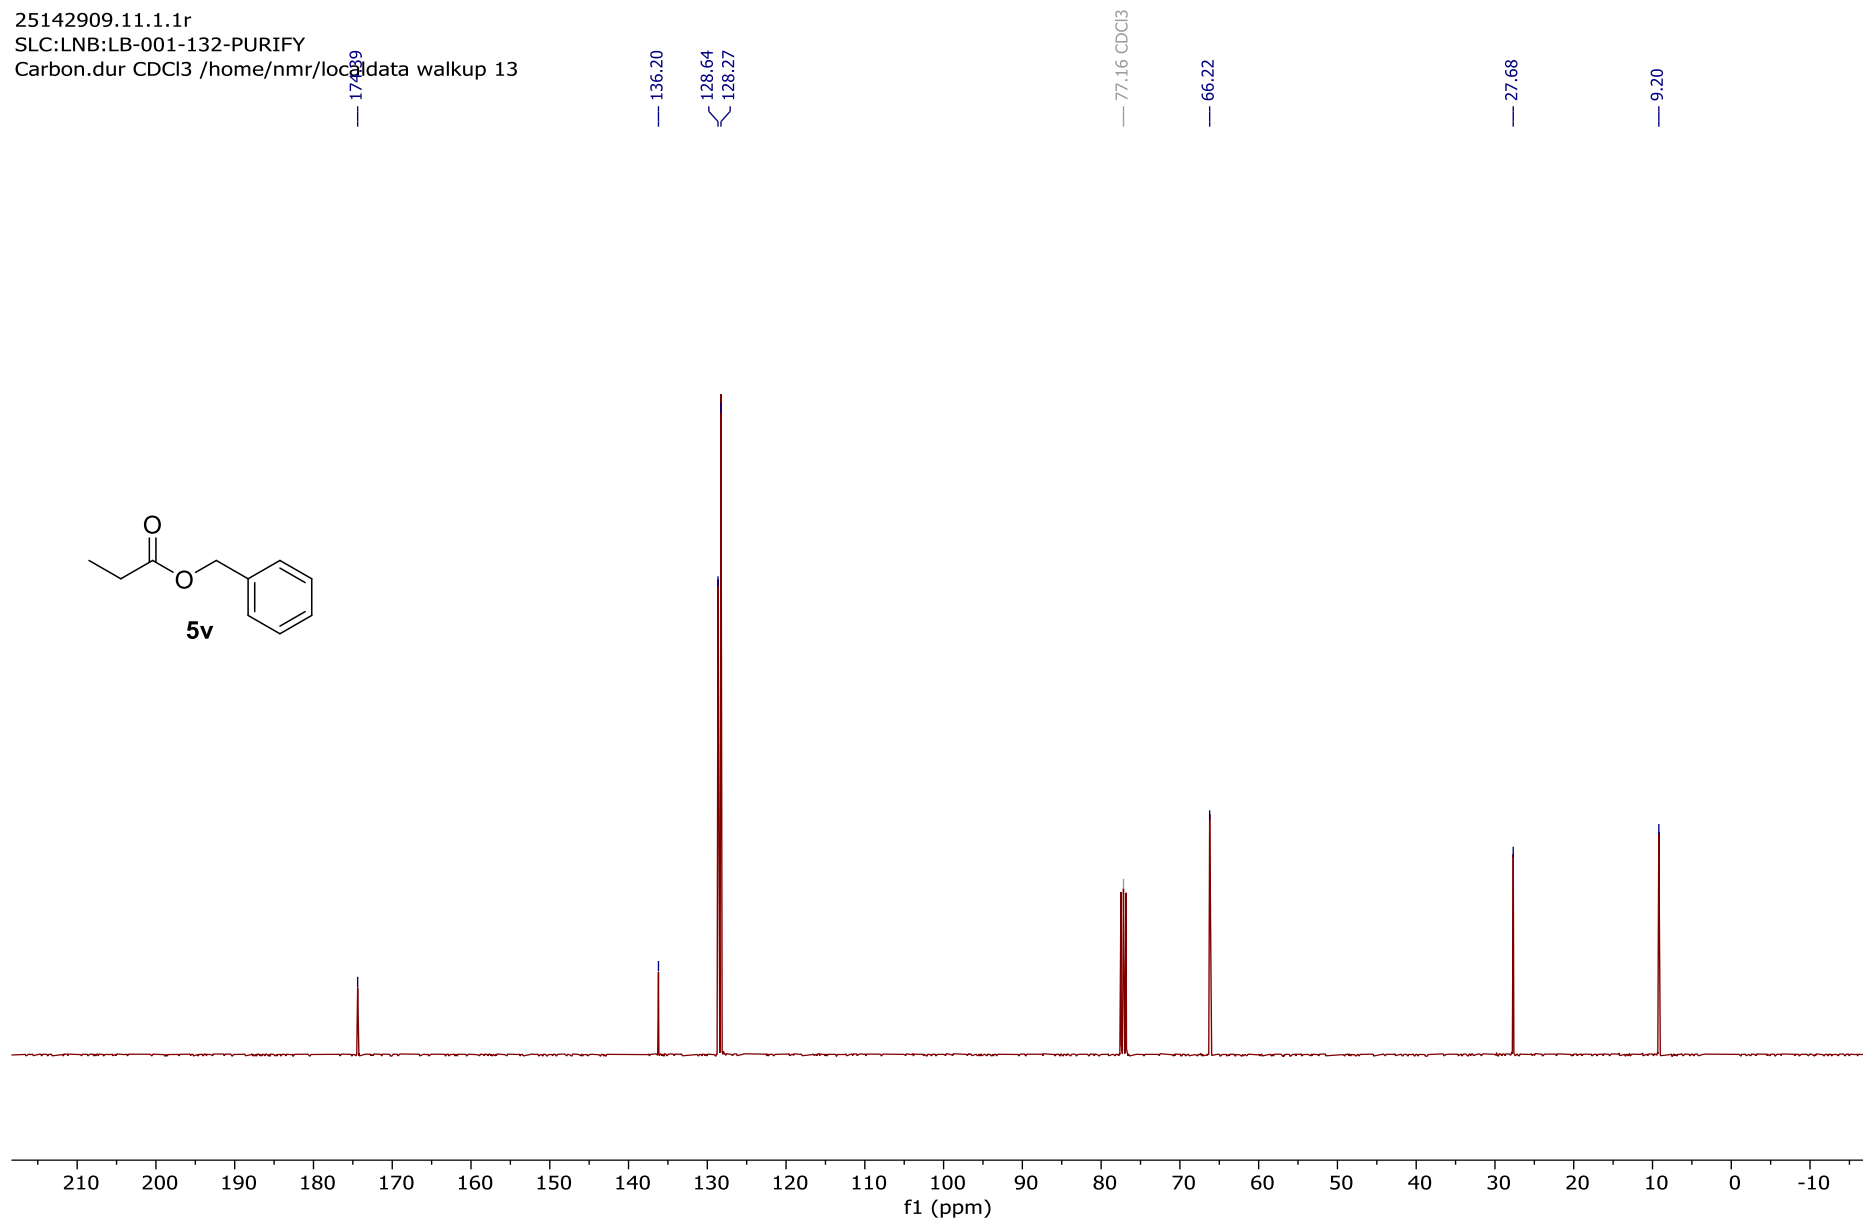

13154617.10.1.1r  
SLC:LNB:LB-001-100-PURIFY

Proton NMR (CDCl<sub>3</sub>) of compound 5w

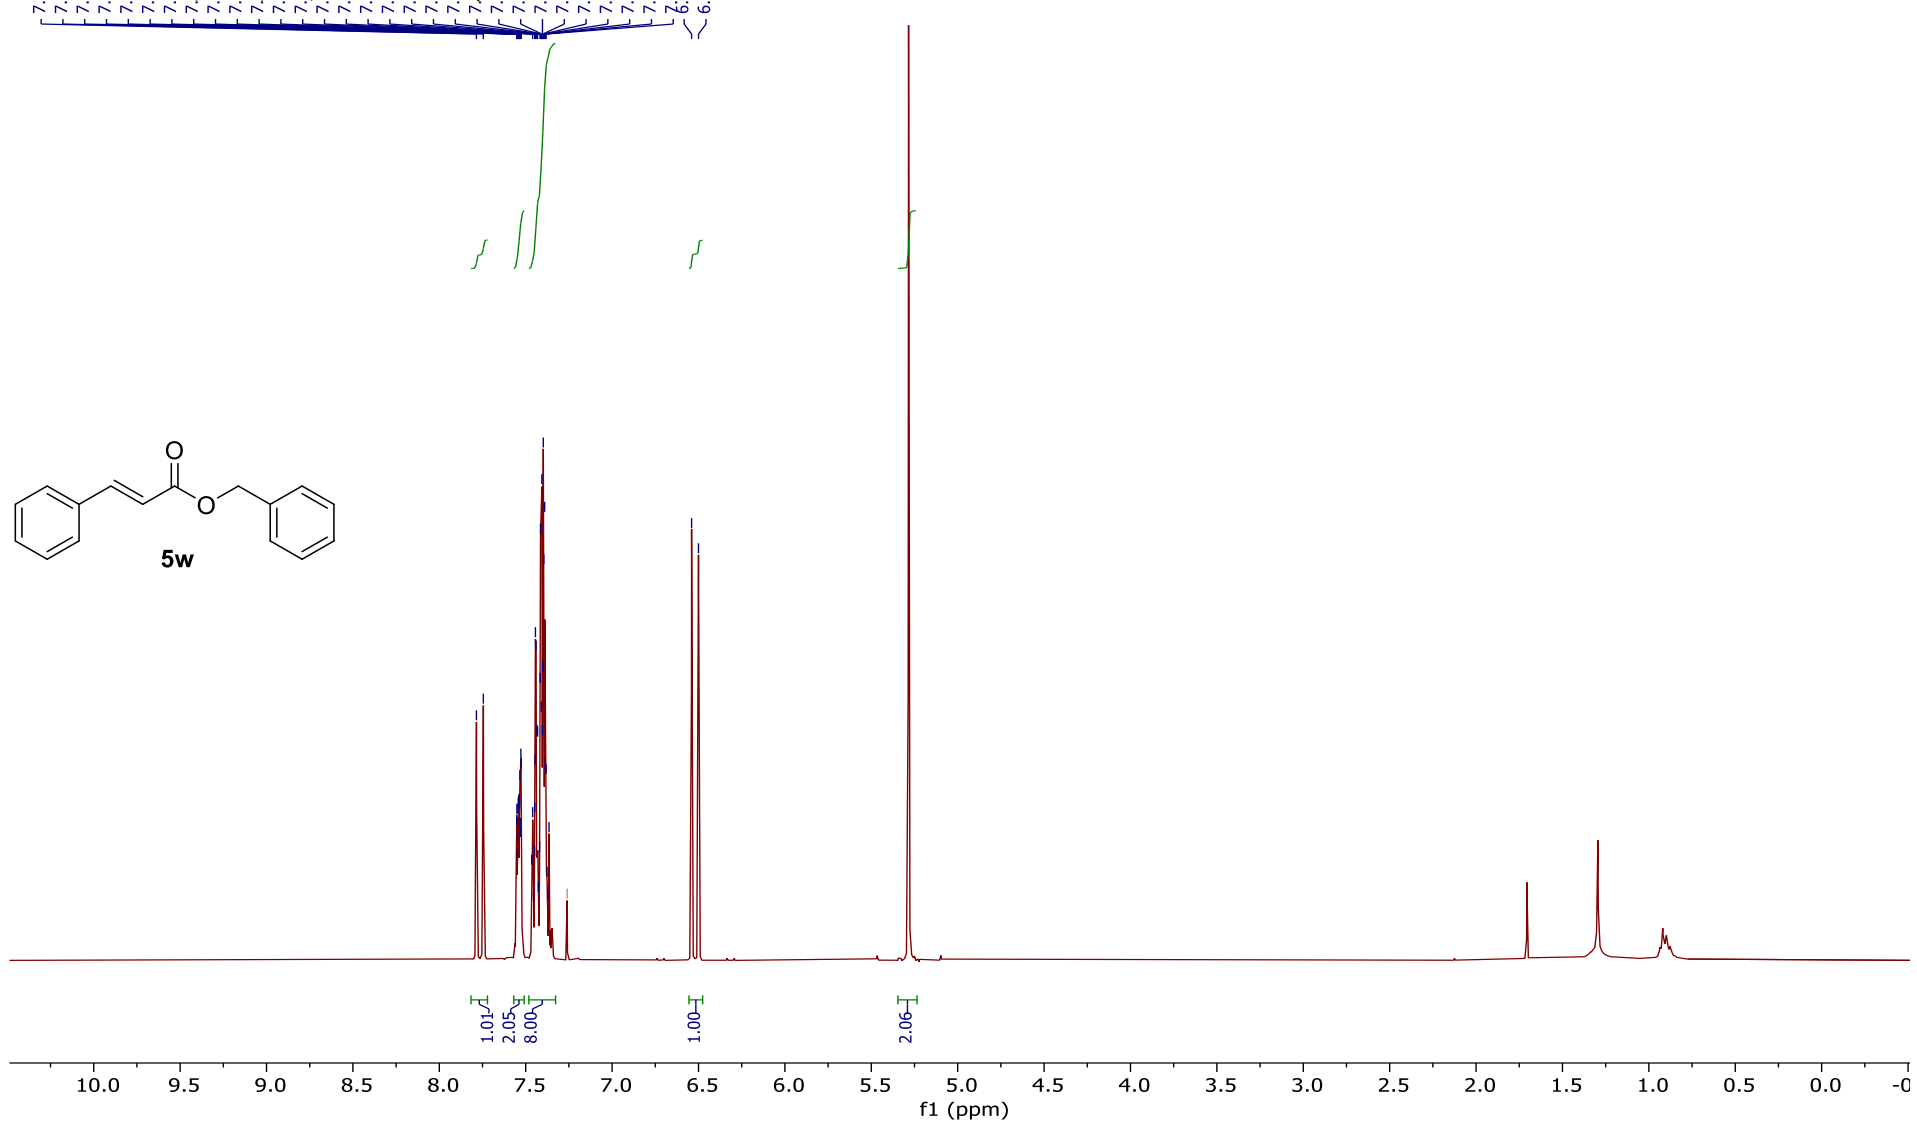



13154617.11.1.1r  
SLC:LNB:LB-001-100-PURIFY

Carbon\_10min.dur CDCl3 /home/nmr/localdata/walkup 2022

166.86

145.27

136.16

134.43

130.44

128.98

128.69

128.38

128.35

128.20

117.96

77.16 CDCl3

66.44

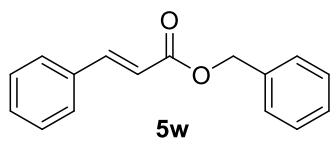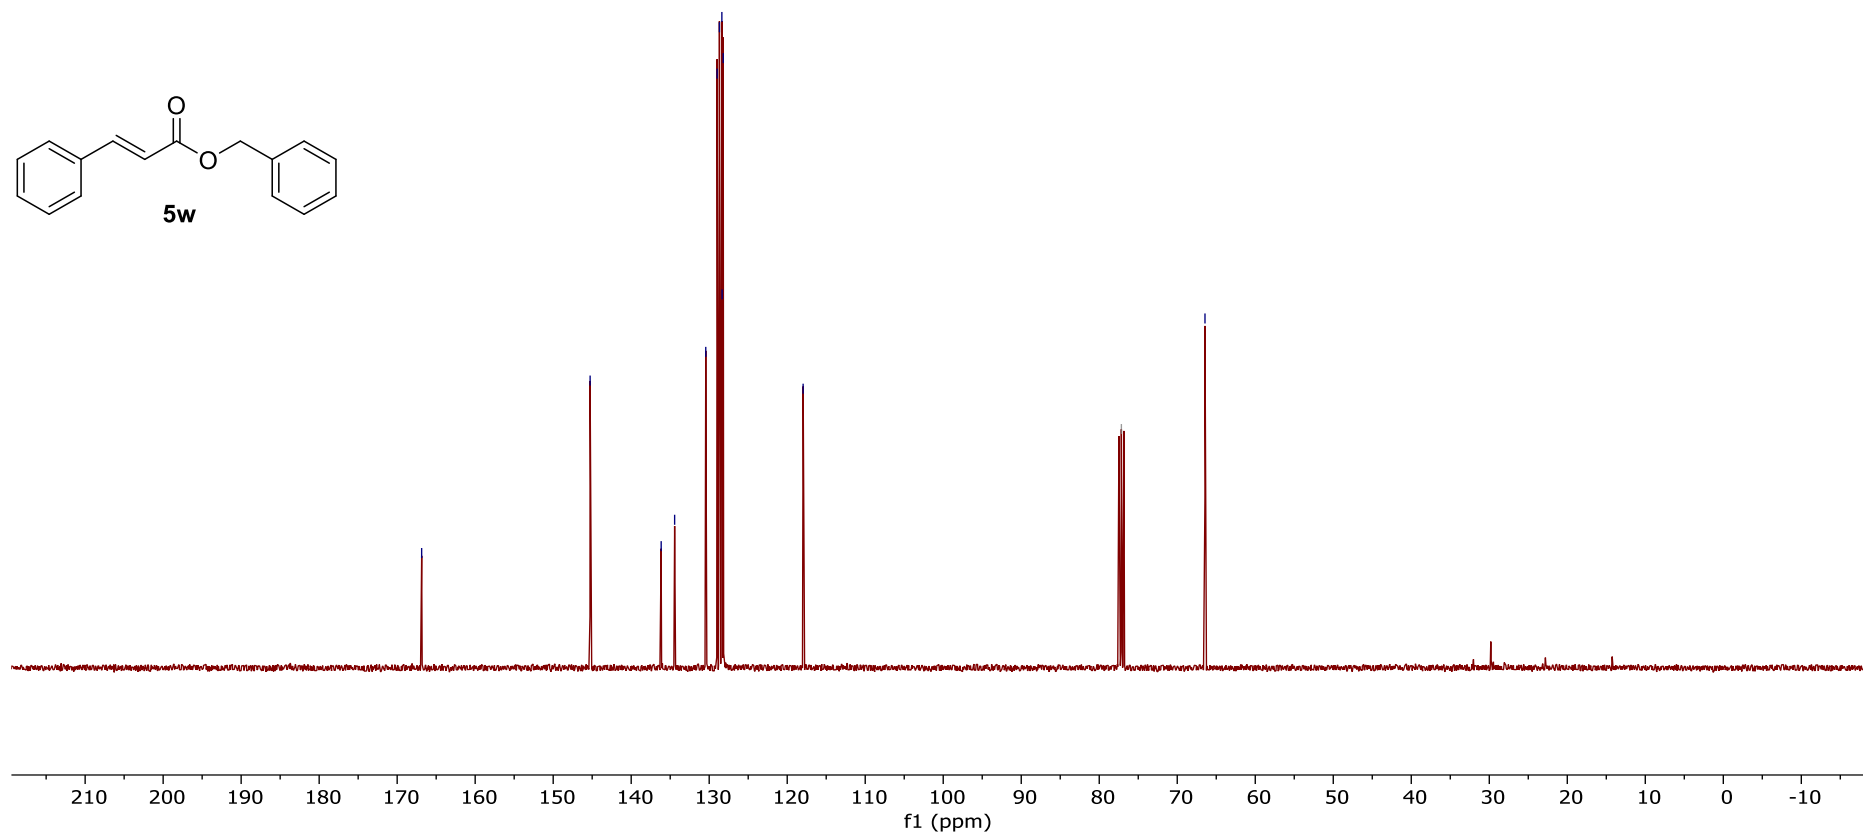

25142930.10.1.1r  
SLC:LNB:LB-001-133-PURIFY  
Proton1.icon CDCl3 /home/nmr/localdata walkup 14

7.38  
7.37  
7.35  
7.35  
7.34  
7.34  
7.28  
7.28  
7.27  
7.26  
7.26  
7.25  
7.25  
7.24

4.28  
4.26  
4.25  
4.23  
4.20  
4.18  
4.18  
4.16  
3.20  
3.19  
3.18  
3.17  
3.15  
3.14  
3.12  
3.10  
2.36  
2.34  
2.32  
2.31  
2.30  
1.38  
1.38  
1.36  
1.34  
1.32  
1.30  
1.18  
1.16  
1.14  
1.12  
1.11

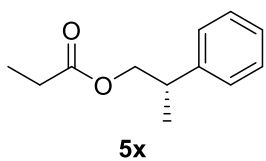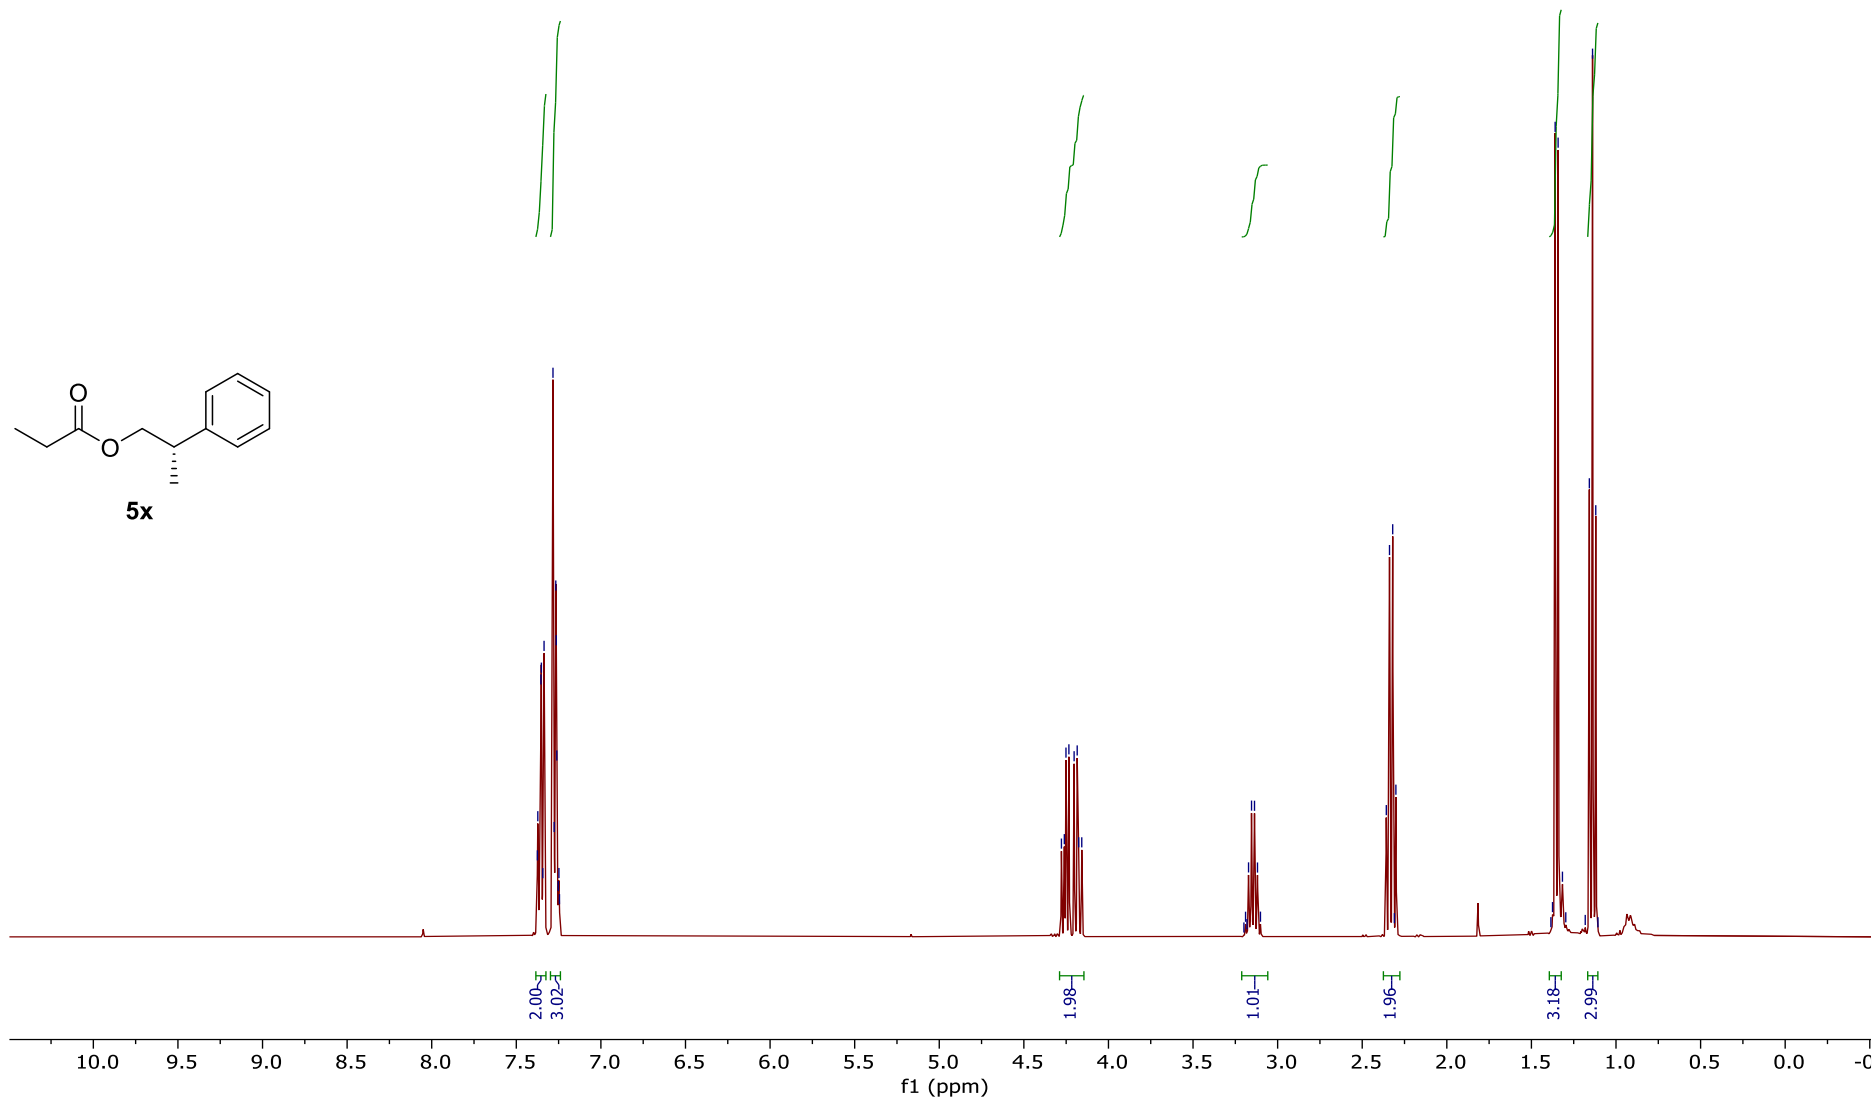

25142930.11.1.1r  
SLC:LNB:LB-001-133-PURIFY  
Carbon.dur CDCl3 /home/nmr/local/data walkup 14

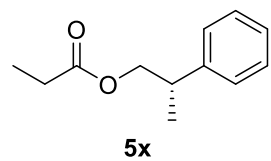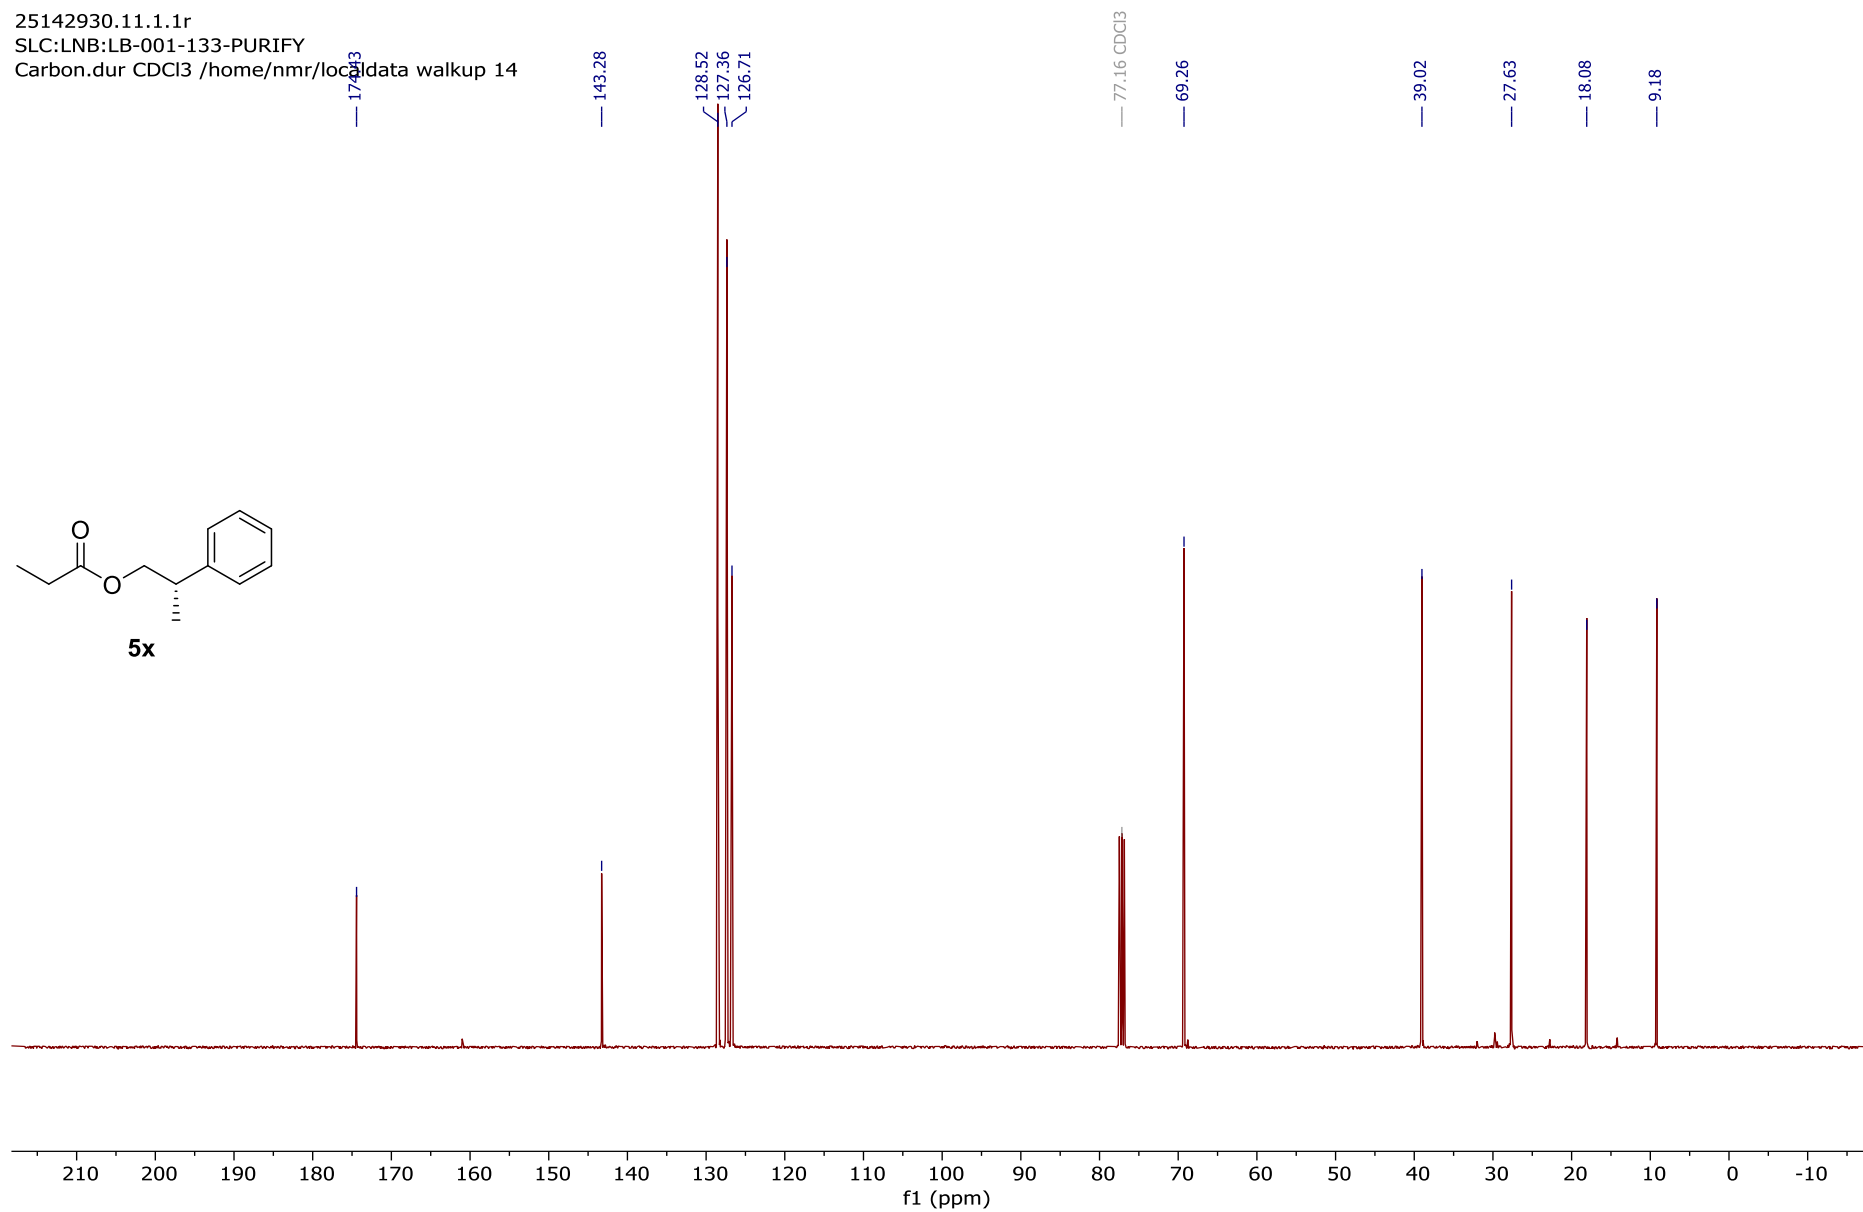

16142753.10  
SLC:LNB:LB-001-66-FRAC38  
Proton1.icon CDCl3 /home/nmr/localdata/waipup 33

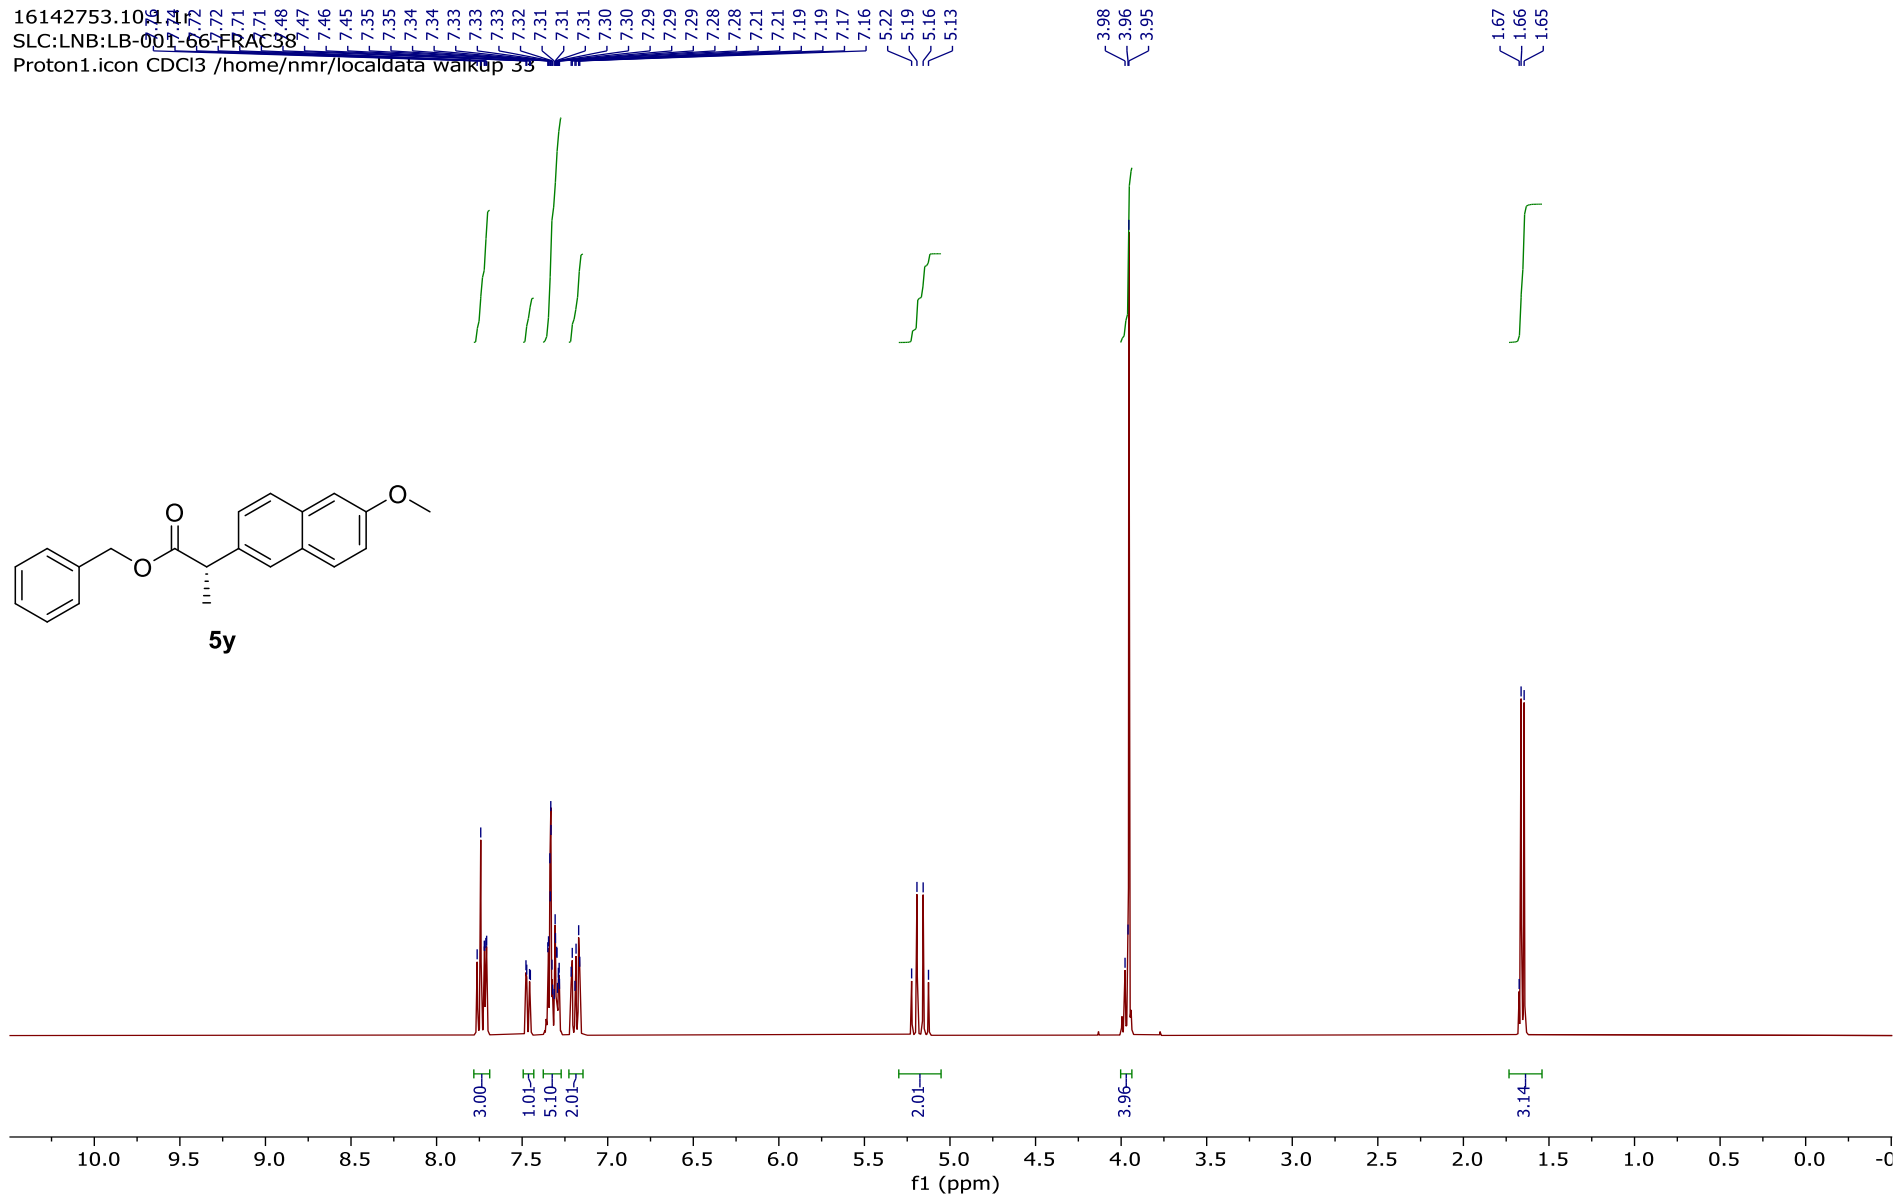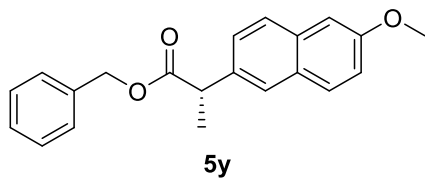

16142753.11.1.1r

SLC:LNB:LB-001-66-FRAC38

Carbon.dur CDCl3 /home/nmr/localdata/walkup/

177.656

155.71

136.08

135.64

133.79

129.39

129.00

128.56

128.17

128.03

127.24

126.39

119.07

105.63

77.16 CDCl3

66.56

55.38

45.54

18.65

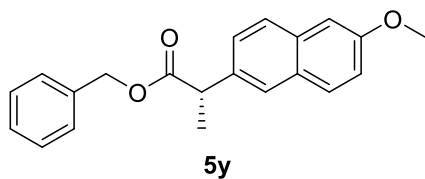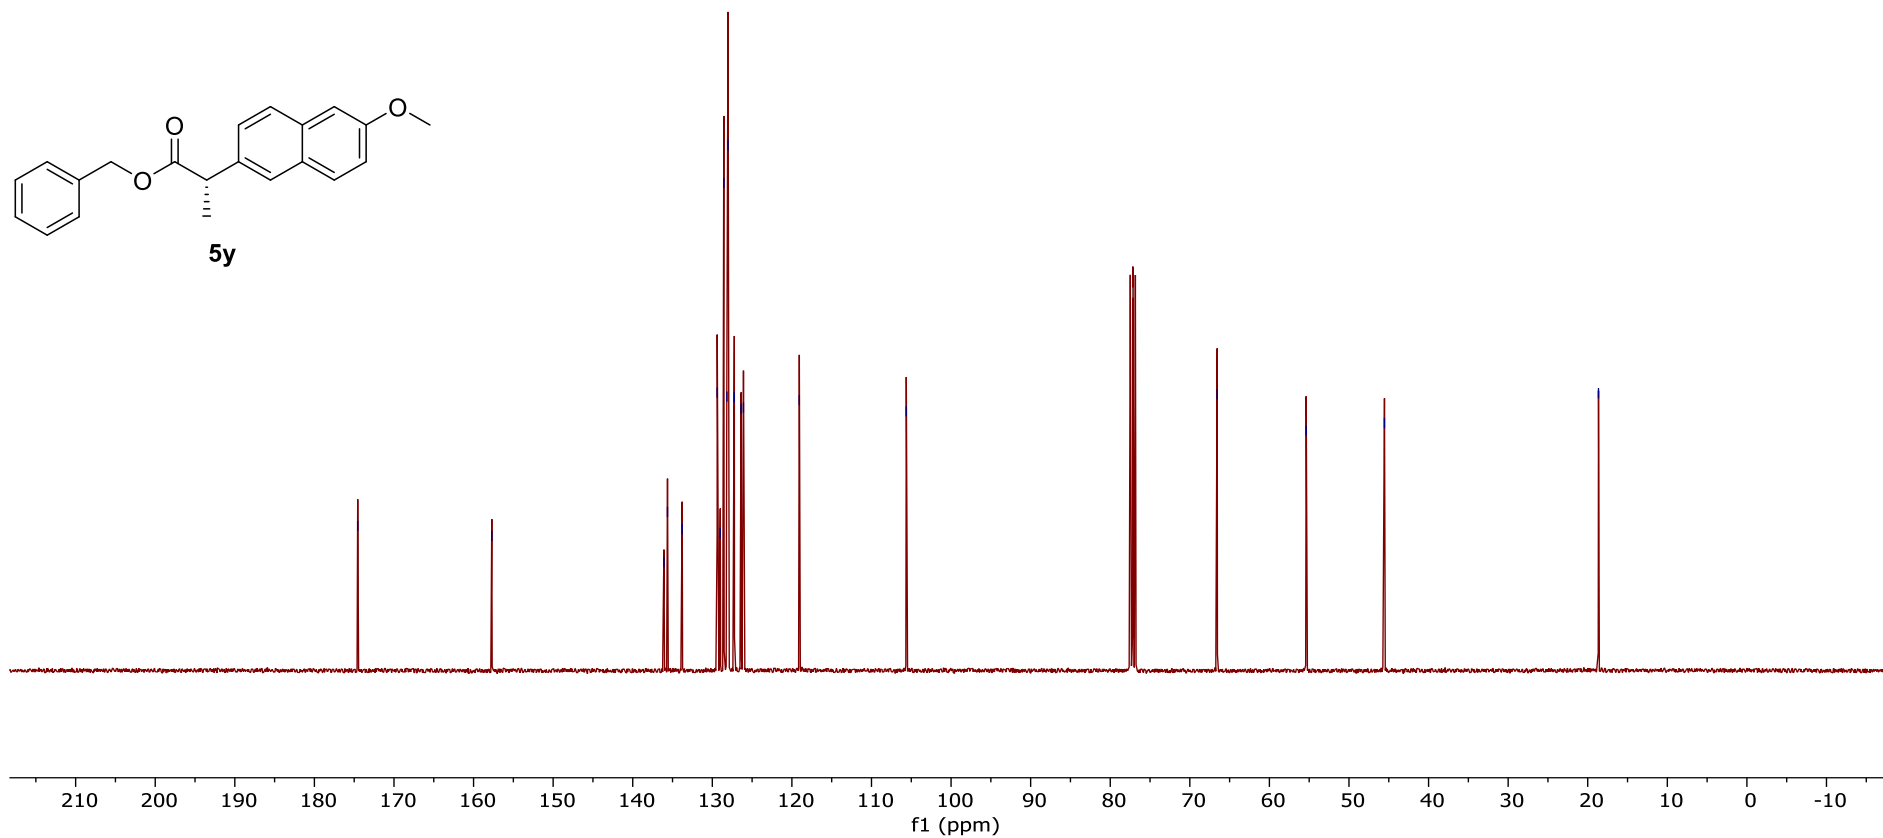

17145200.10.1.1r  
SLC:LNB:LB-001-65-PURIFY  
Proton1.icon CDCl3 /home/mf/16-01-18

7.776  
7.775  
7.774  
7.773  
7.772  
7.771  
7.770  
7.769  
7.768  
7.767  
7.766  
7.765  
7.764  
7.763  
7.762  
7.761  
7.760  
7.759  
7.758  
7.757  
7.756  
7.755  
7.754  
7.753  
7.752  
7.751  
7.750  
7.749  
7.748  
7.747  
7.746  
7.745  
7.744  
7.743  
7.742  
7.741  
7.740  
7.739  
7.738  
7.737  
7.736  
7.735  
7.734  
7.733  
7.732  
7.731  
7.730  
7.729  
7.728  
7.727  
7.726  
7.725  
7.724  
7.723  
7.722  
7.721  
7.720  
7.719  
7.718  
7.717  
7.716  
7.715  
7.714  
7.713  
7.712  
7.711  
7.710  
7.709  
7.708  
7.707  
7.706  
7.705  
7.704  
7.703  
7.702  
7.701  
7.700  
7.699  
7.698  
7.697  
7.696  
7.695  
7.694  
7.693  
7.692  
7.691  
7.690  
7.689  
7.688  
7.687  
7.686  
7.685  
7.684

3.97  
3.96  
3.95  
3.94  
3.92  
3.78

2.51  
2.49  
1.96  
1.95  
1.93  
1.91  
1.90  
1.88  
1.86  
1.84  
1.83  
1.63  
1.61  
0.95  
0.93

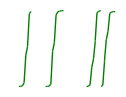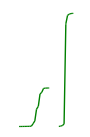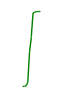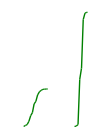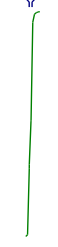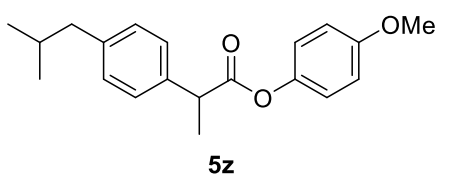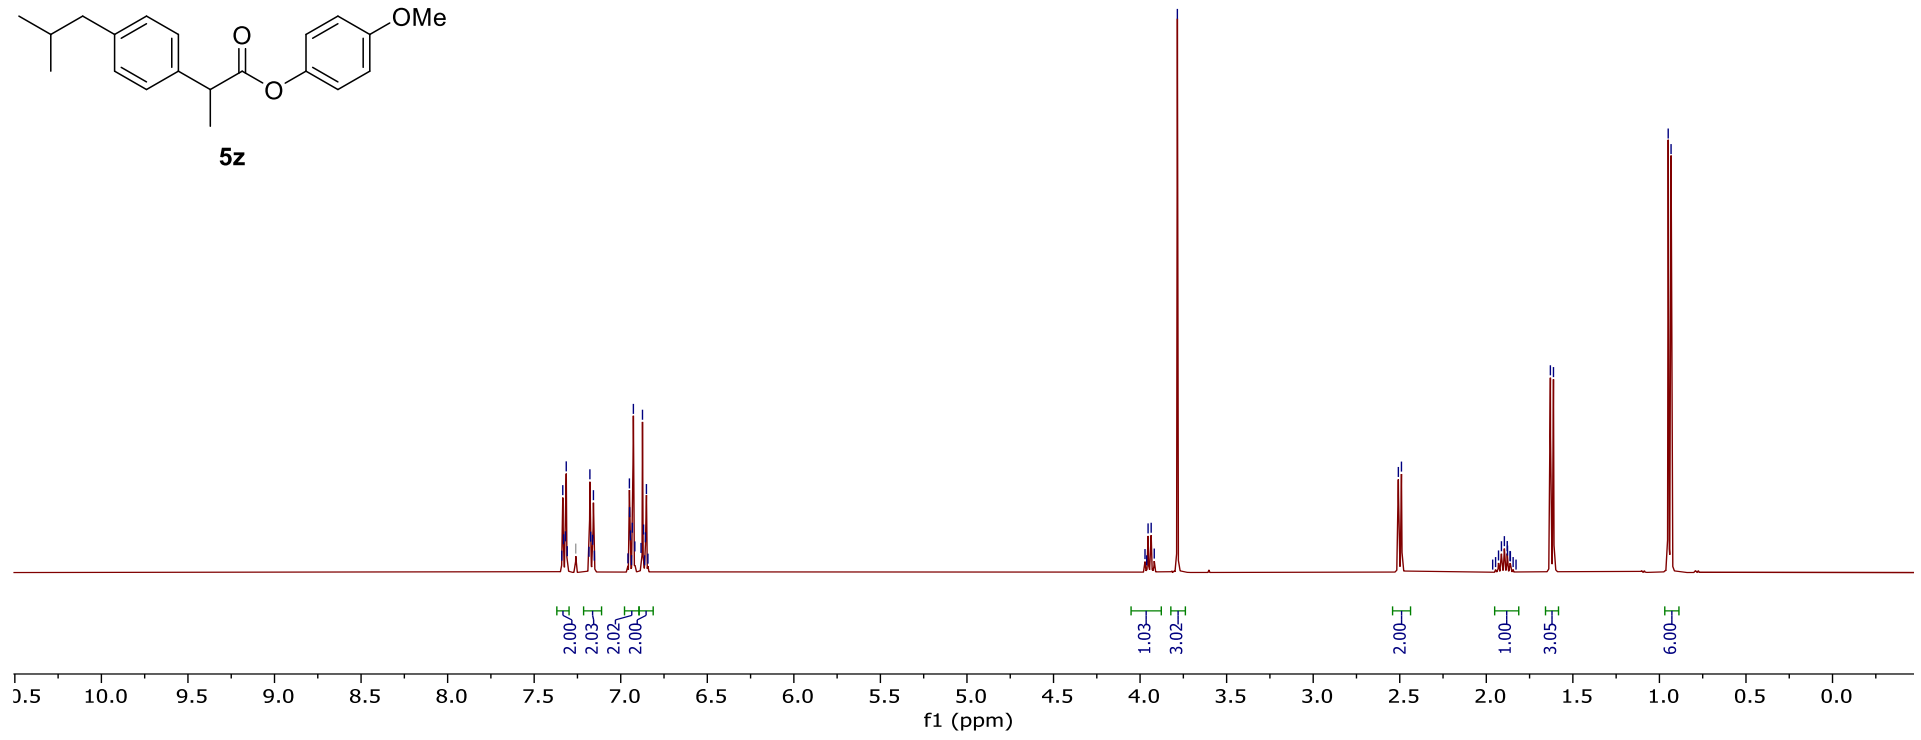

17145200.11.1.1r  
SLC:LNB:LB-001-65-PURIFY  
Carbon.dur CDCl3 /home/nmr/local/data/walkup/

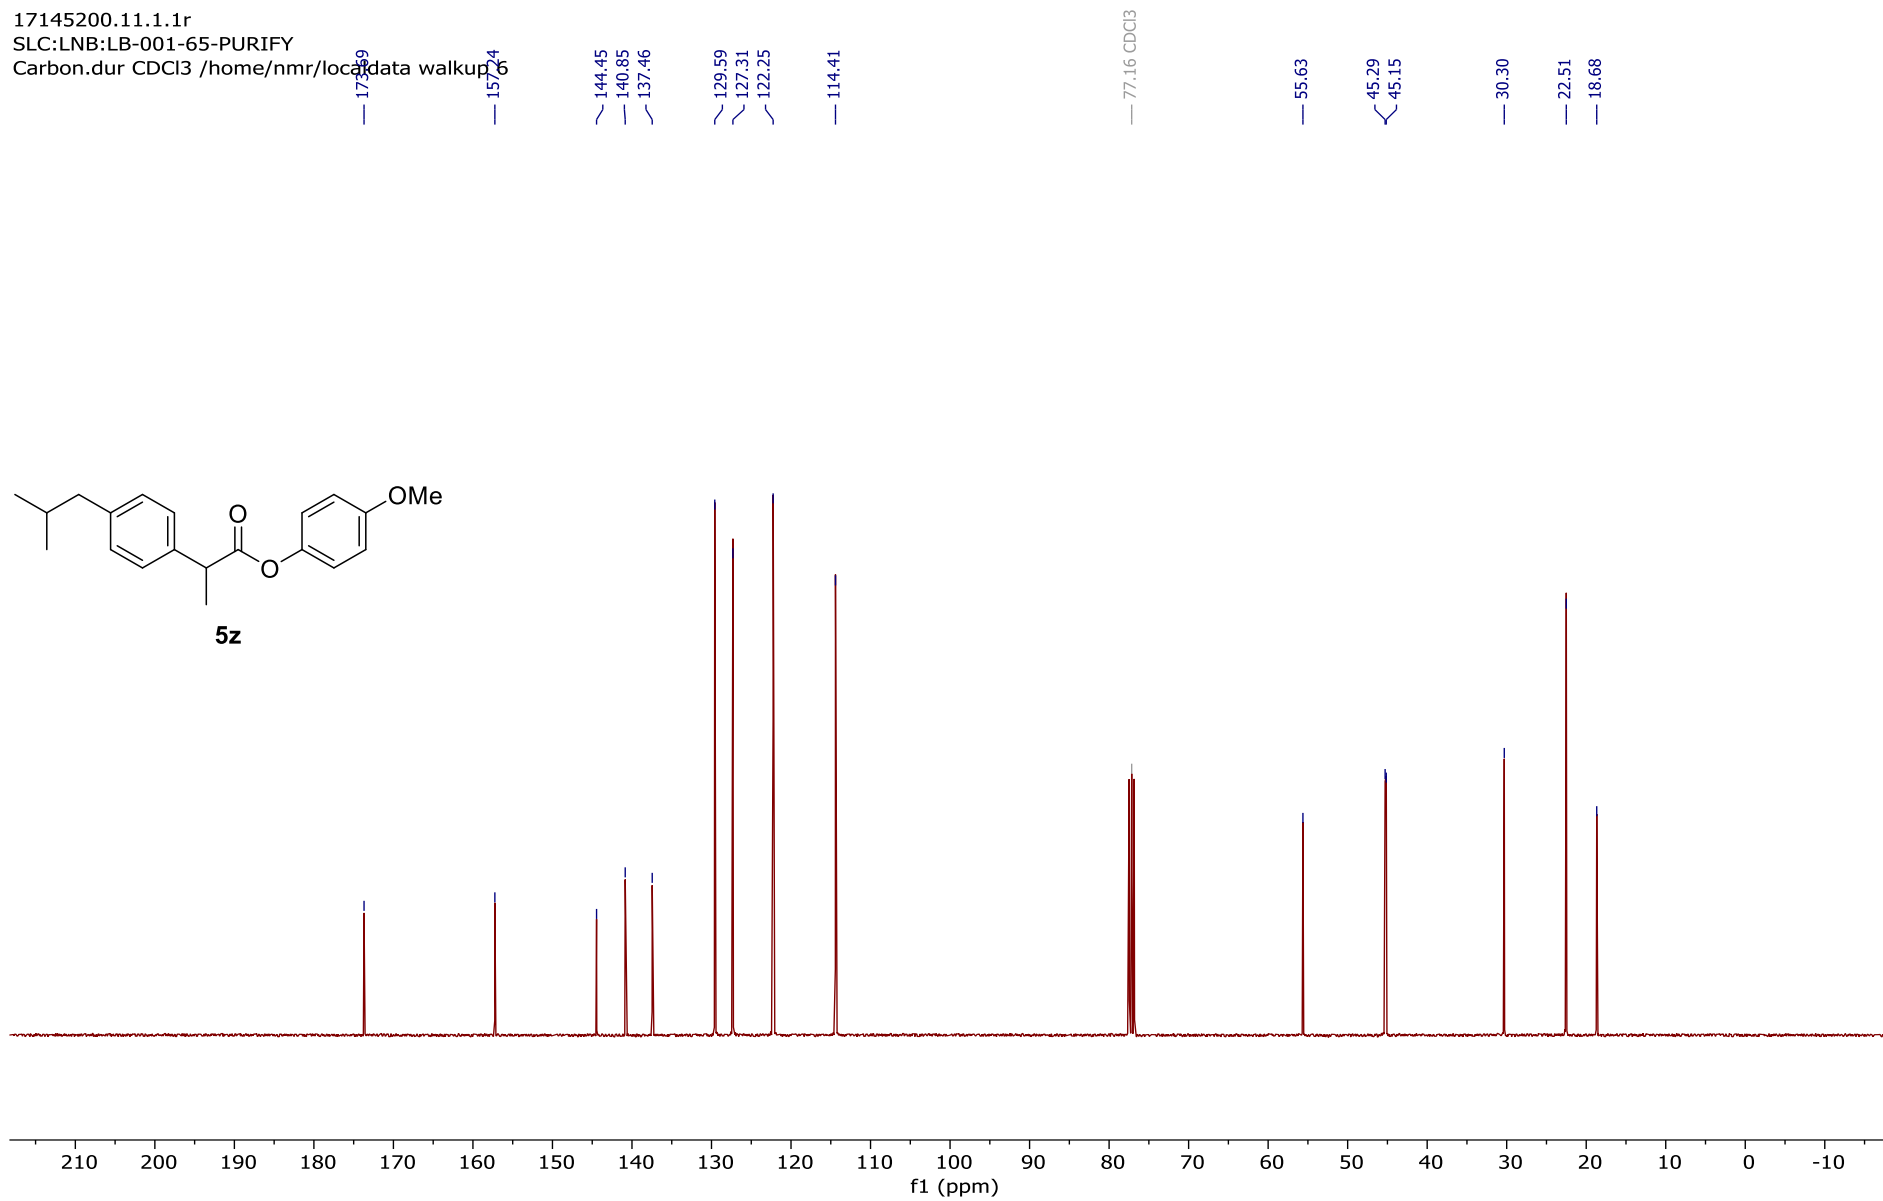

16162010.10.1.1r  
SLC:LNB:LB-001-44B-PURIFY  
Proton1.icon CDCl3 /home/nmr/localdata/walkup 59

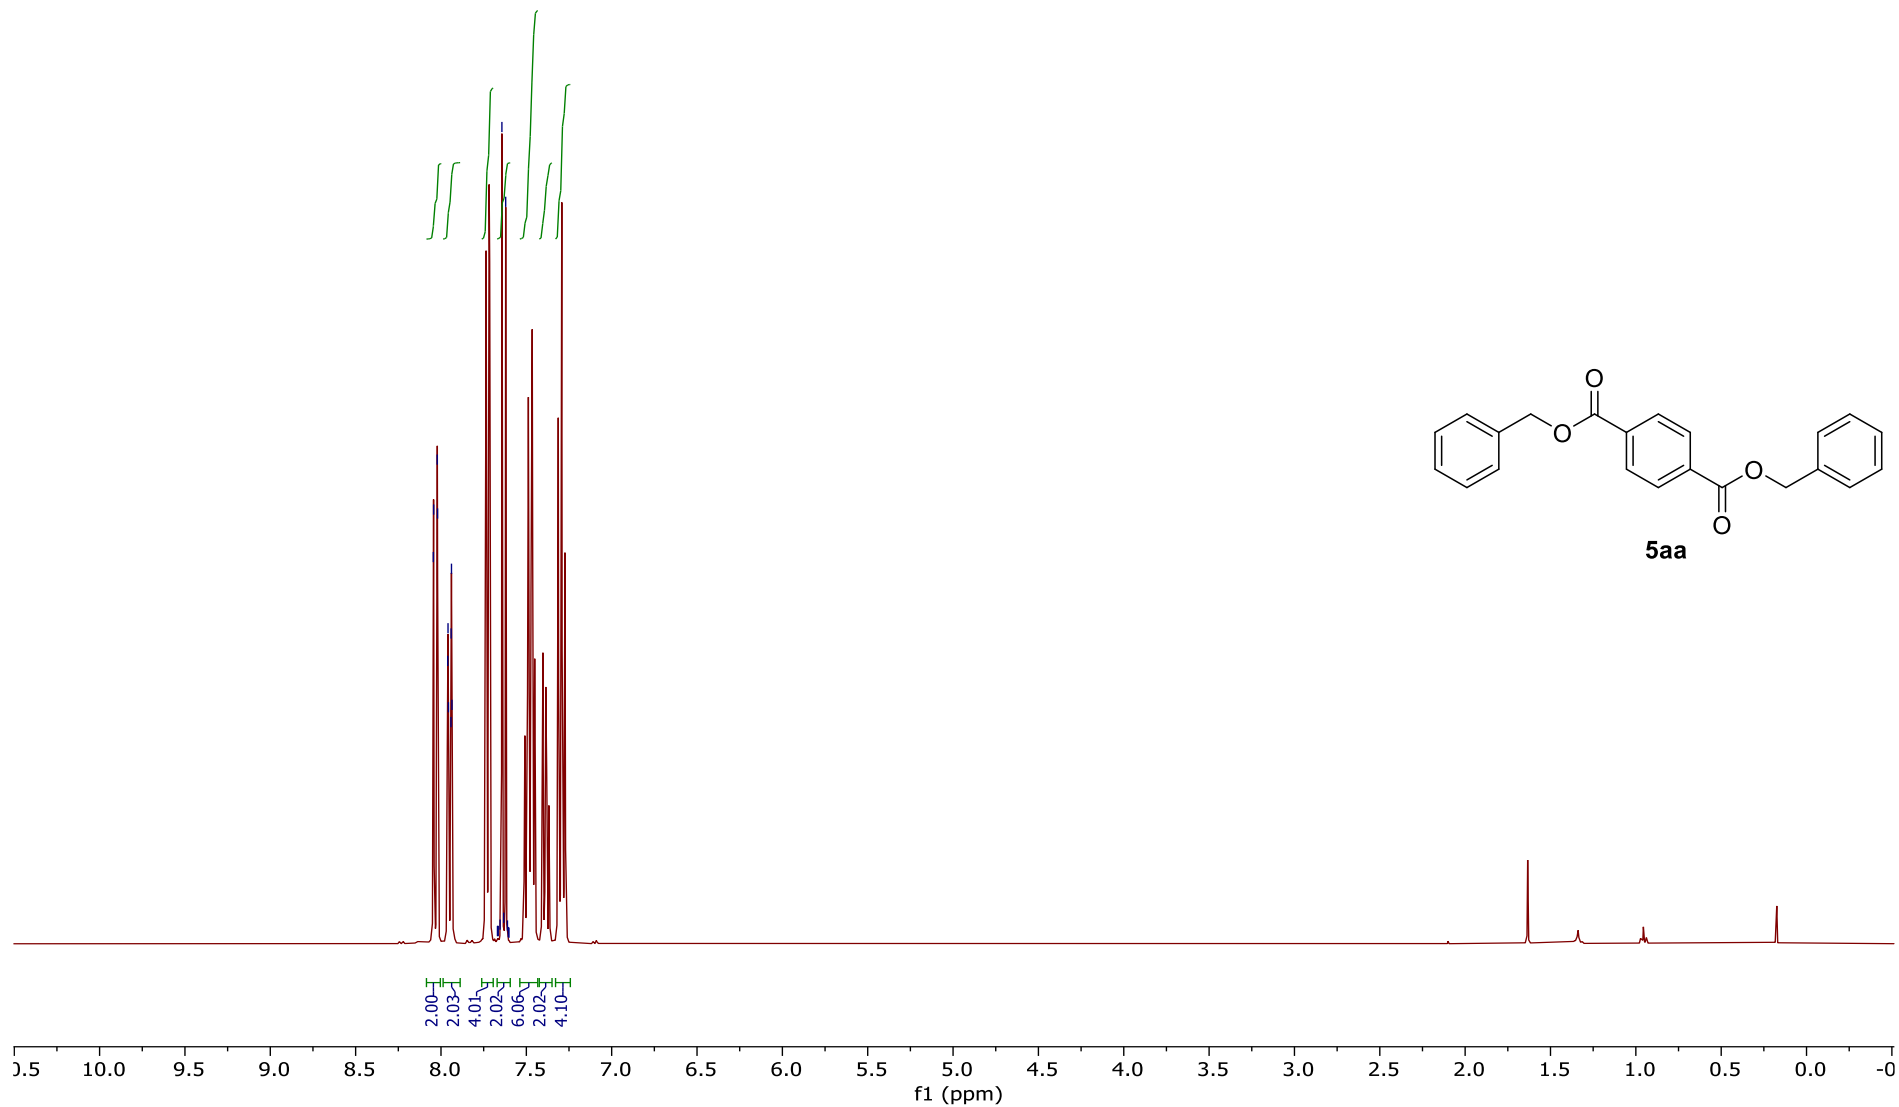

S-80



16162010.11.1.1r  
SLC:LNB:LB-001-44B-PURIFY  
Carbon.dur CDCl3 /home/nmr/localdata v3  
Backup 59

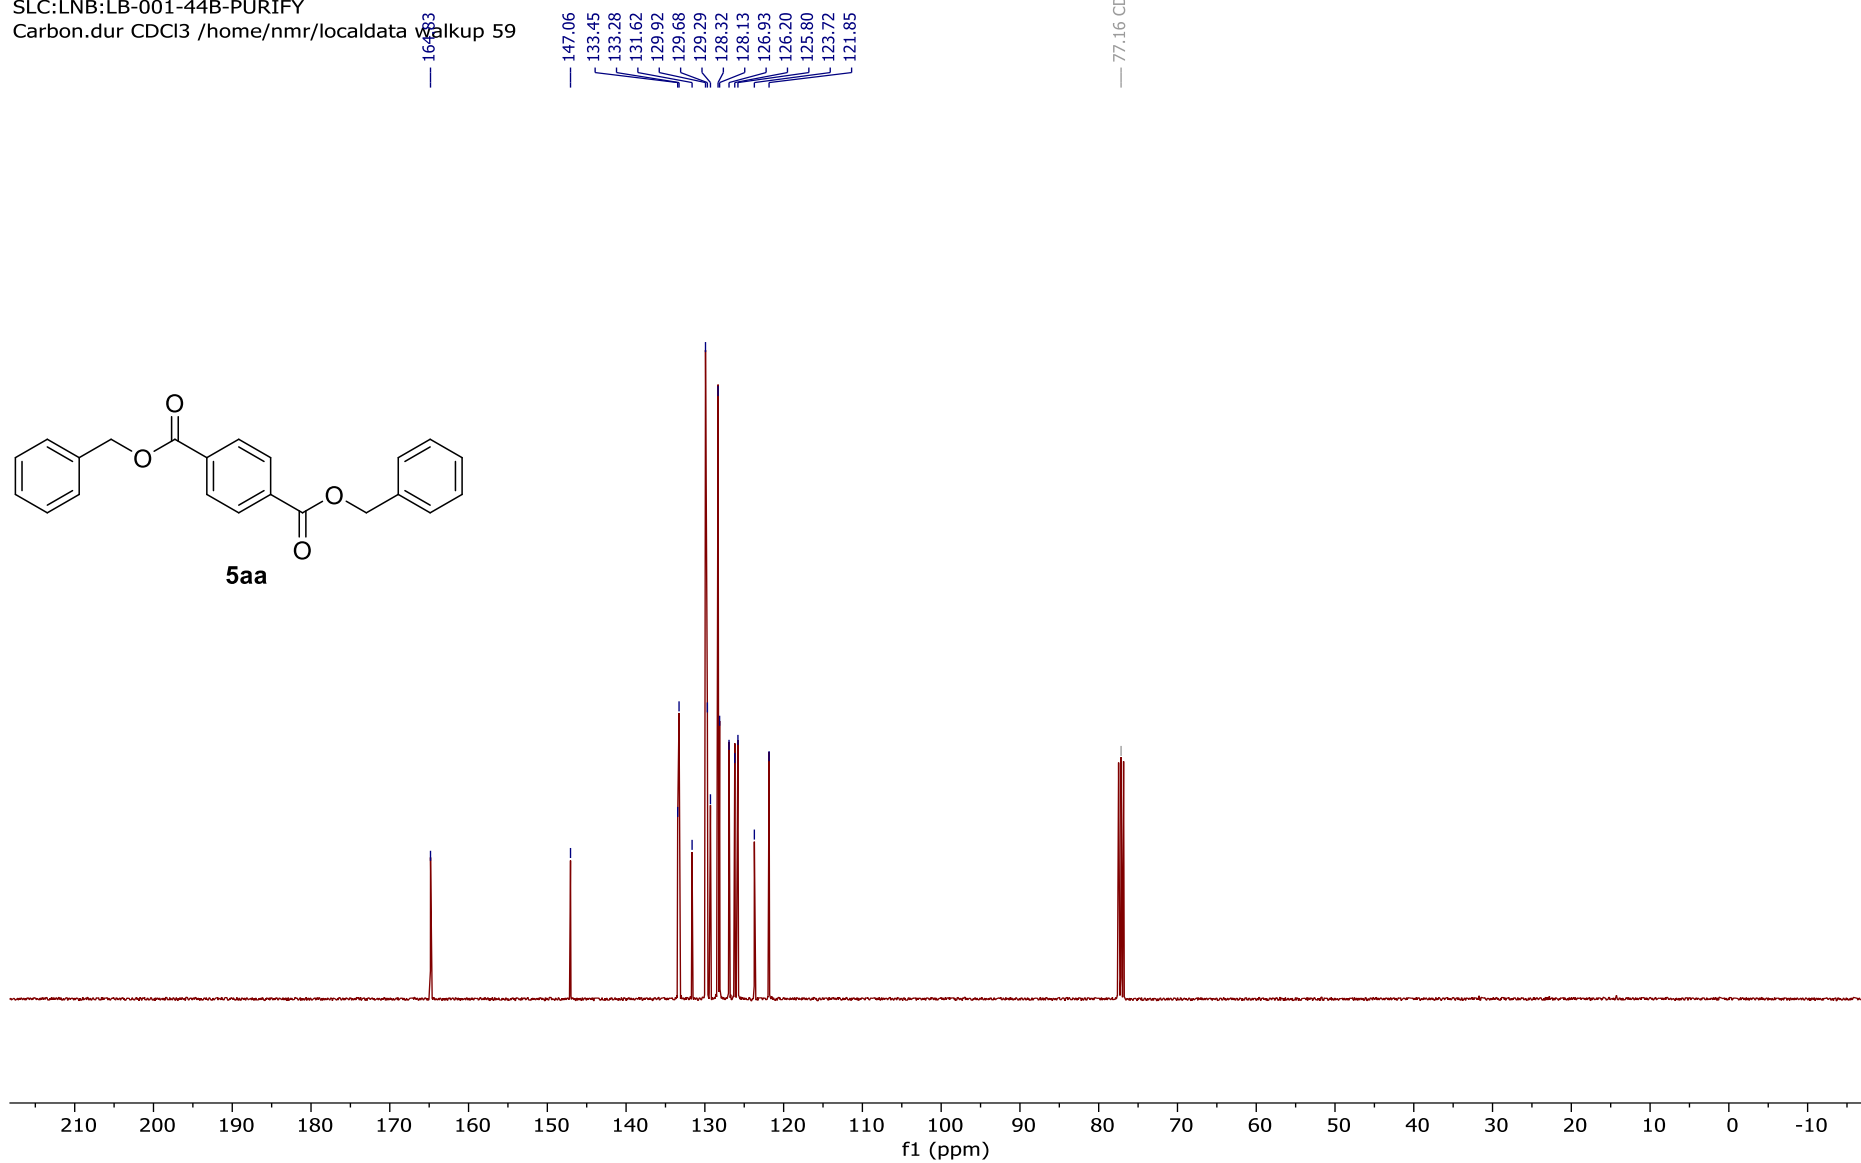

PROTON\_01  
SLC:LNB:LB-128

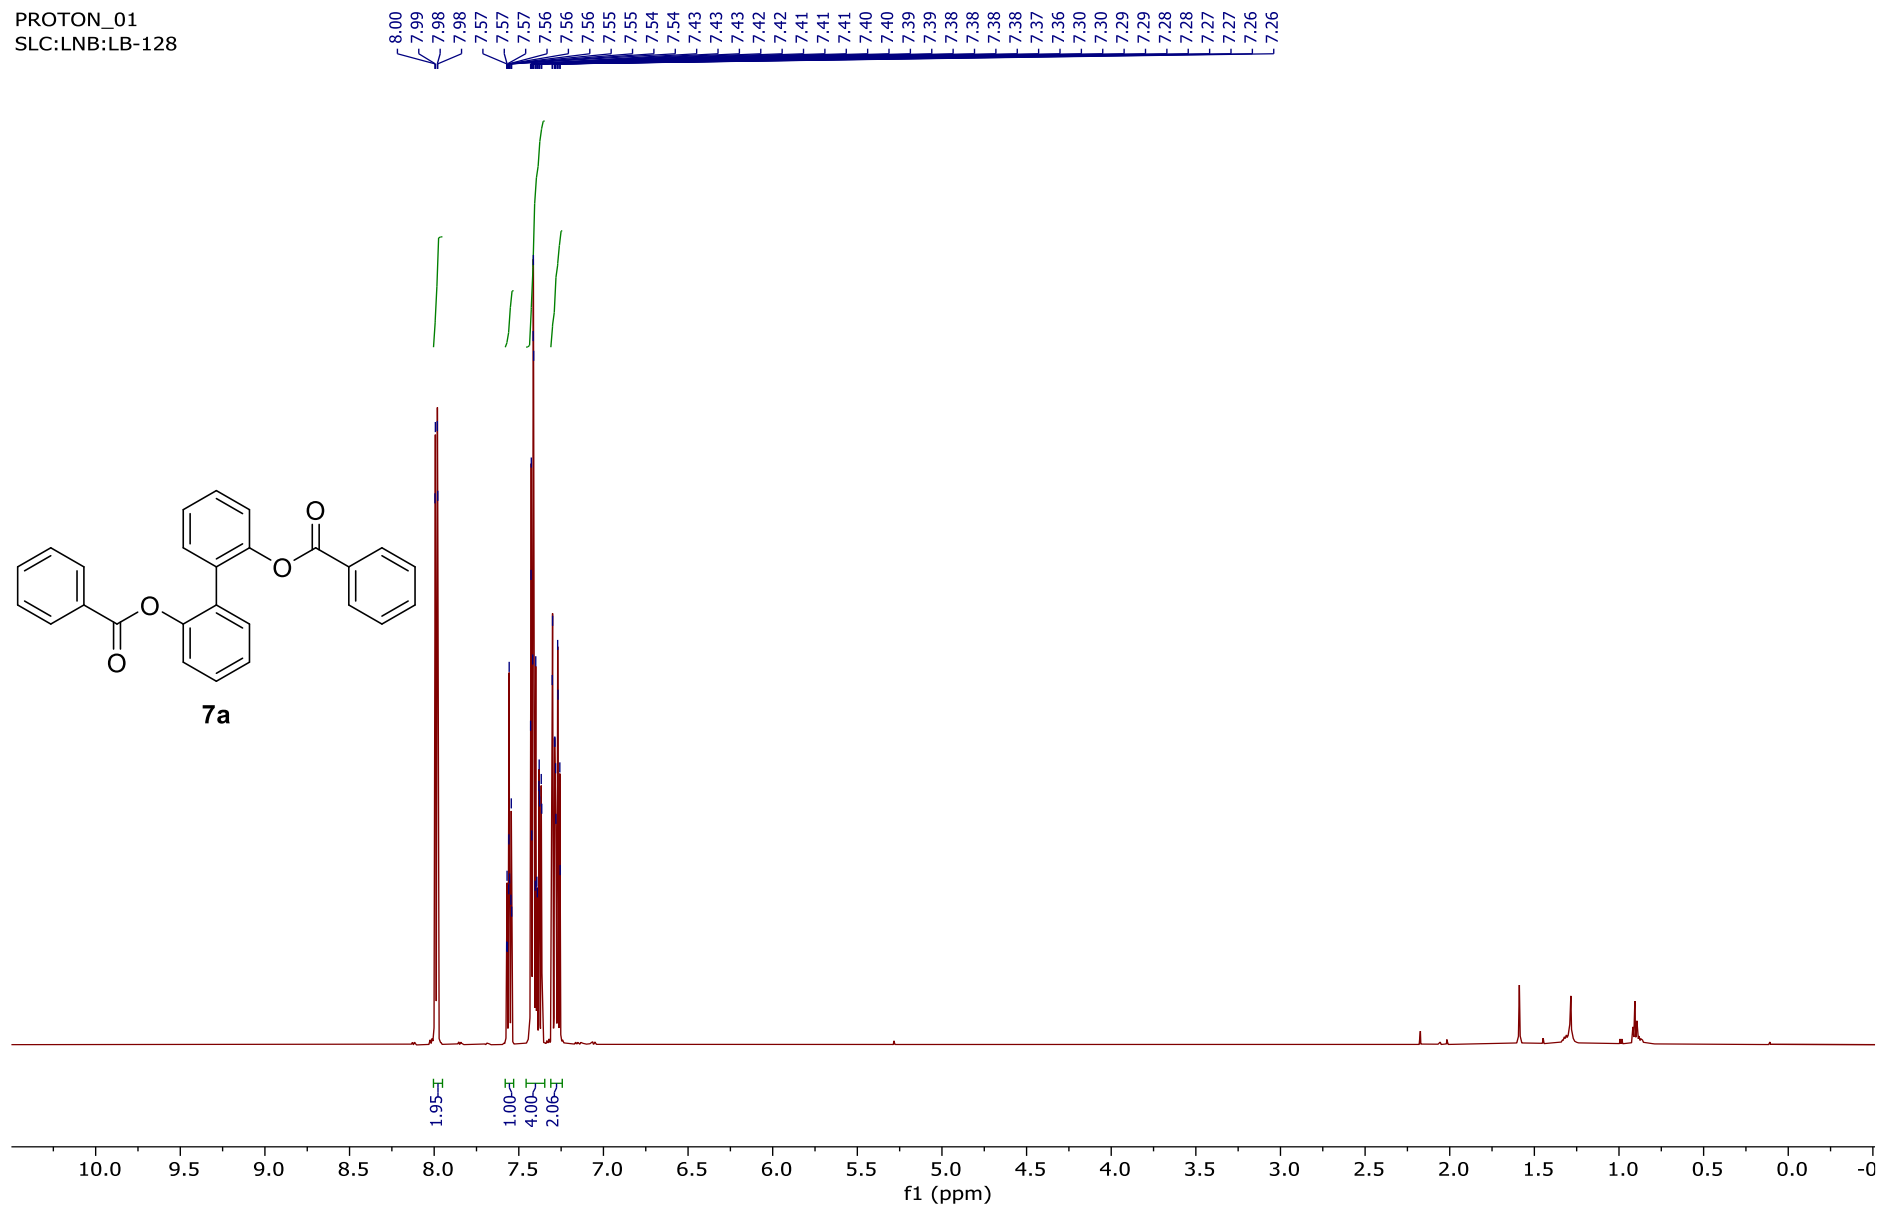

CARBON\_01  
SLC:LNB:LB-128

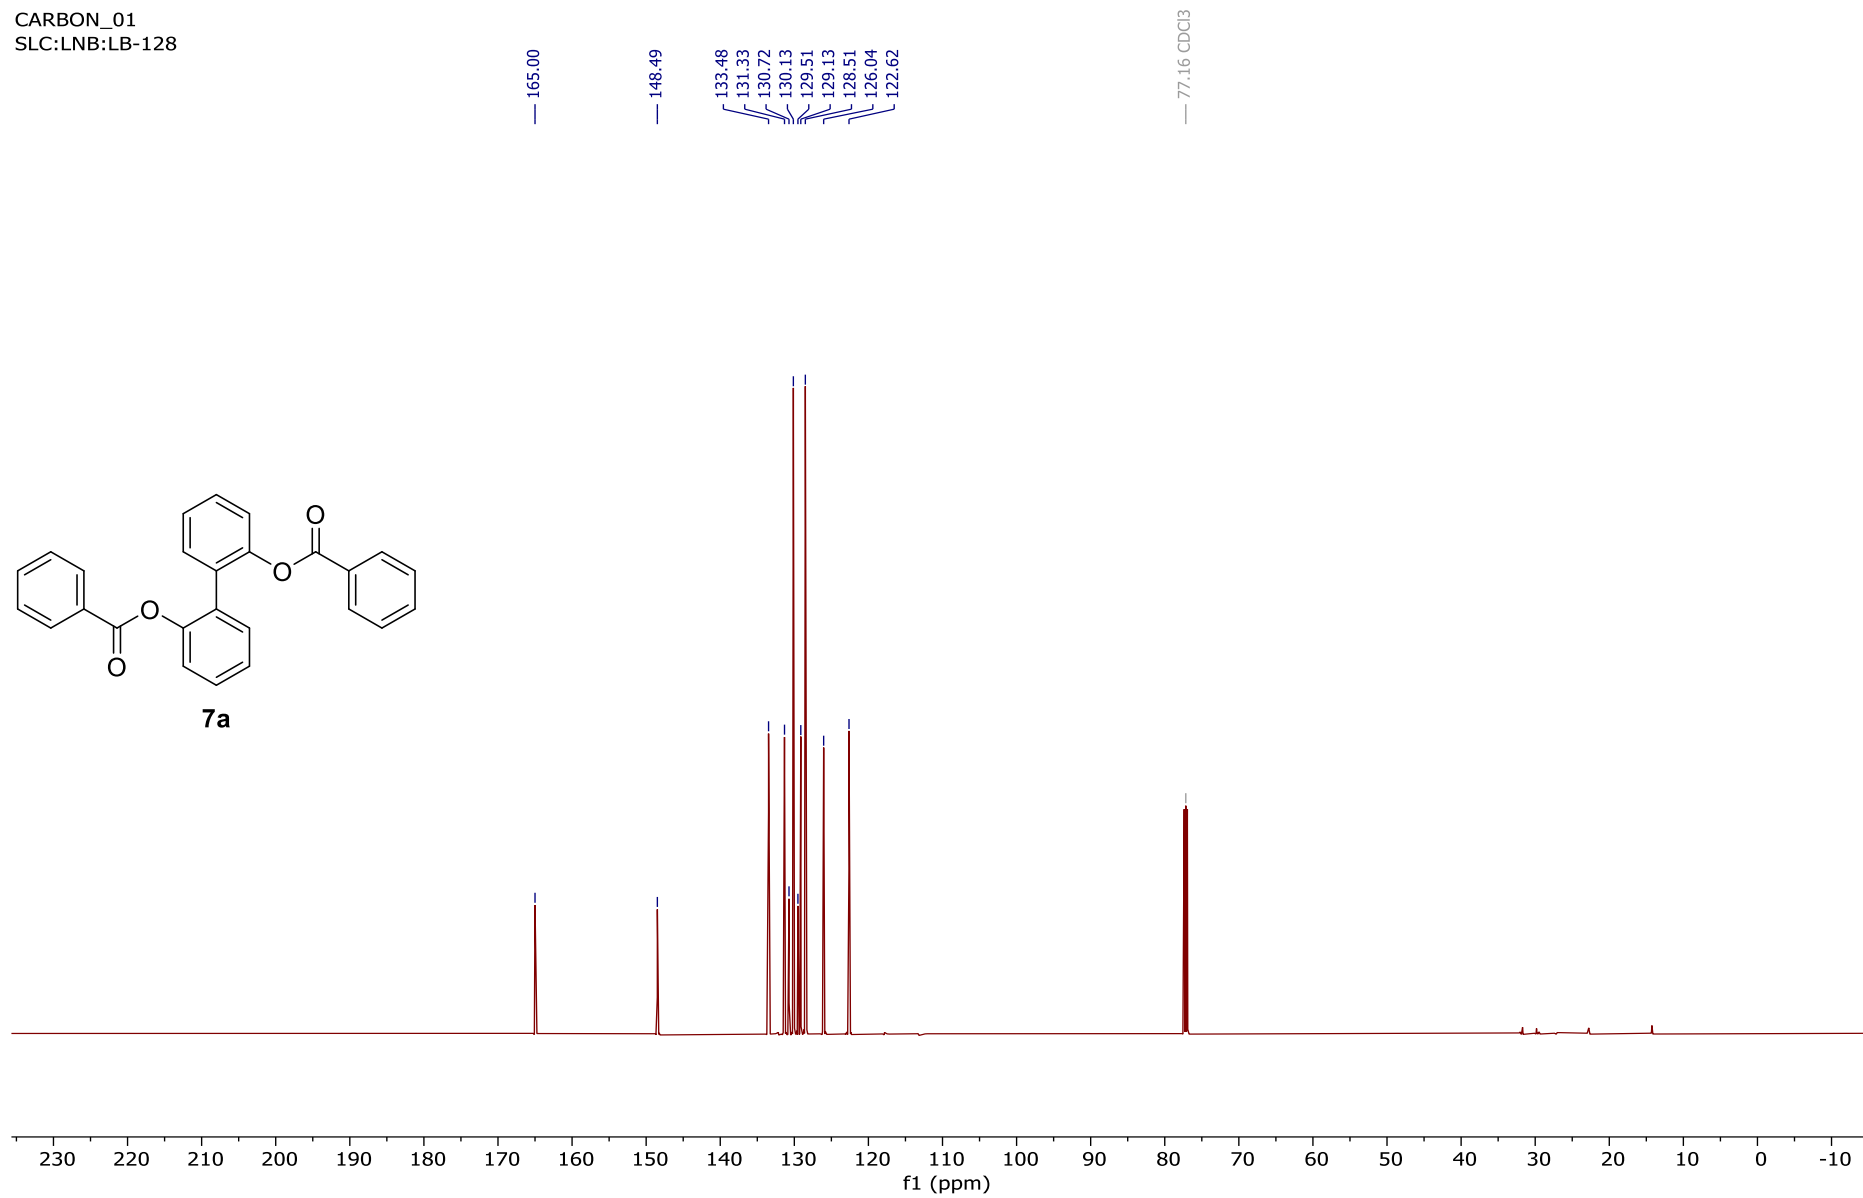

17151058.10.1.1r

SLC:LNB:LB-001-44D

Proton1

8.55  
8.51  
8.47  
8.43  
8.39  
8.35  
8.31  
8.27  
8.23  
8.19  
8.15  
8.11  
8.07  
8.03  
7.99  
7.95  
7.91  
7.87  
7.83  
7.79  
7.75  
7.71  
7.67  
7.63  
7.59  
7.55  
7.51  
7.47  
7.43  
7.39  
7.35  
7.31  
7.27  
7.23  
7.19  
7.15  
7.11  
7.07  
7.03  
7.00  
6.97  
6.94  
6.91  
6.88  
6.85  
6.82  
6.79  
6.76  
6.73  
6.70  
6.67  
6.64  
6.61  
6.58  
6.55  
6.52  
6.49  
6.46  
6.43  
6.40  
6.37  
6.34  
6.31  
6.28  
6.25  
6.22  
6.19  
6.16  
6.13  
6.10  
6.07  
6.04  
6.01  
5.98  
5.95  
5.92  
5.89  
5.86  
5.83  
5.80  
5.77  
5.74  
5.71  
5.68  
5.65  
5.62  
5.59  
5.56  
5.53  
5.50  
5.47  
5.44  
5.41  
5.38  
5.35  
5.32  
5.29  
5.26  
5.23  
5.20  
5.17  
5.14  
5.11  
5.08  
5.05  
5.02  
5.00  
4.97  
4.94  
4.91  
4.88  
4.85  
4.82  
4.79  
4.76  
4.73  
4.70  
4.67  
4.64  
4.61  
4.58  
4.55  
4.52  
4.49  
4.46  
4.43  
4.40  
4.37  
4.34  
4.31  
4.28  
4.25  
4.22  
4.19  
4.16  
4.13  
4.10  
4.07  
4.04  
4.01  
3.98  
3.95  
3.92  
3.89  
3.86  
3.83  
3.80  
3.77  
3.74  
3.71  
3.68  
3.65  
3.62  
3.59  
3.56  
3.53  
3.50  
3.47  
3.44  
3.41  
3.38  
3.35  
3.32  
3.29  
3.26  
3.23  
3.20  
3.17  
3.14  
3.11  
3.08  
3.05  
3.02  
3.00  
2.97  
2.94  
2.91  
2.88  
2.85  
2.82  
2.79  
2.76  
2.73  
2.70  
2.67  
2.64  
2.61  
2.58  
2.55  
2.52  
2.50  
2.47  
2.44  
2.41  
2.38  
2.35  
2.32  
2.29  
2.26  
2.23  
2.20  
2.17  
2.14  
2.11  
2.08  
2.05  
2.02  
2.00  
1.97  
1.94  
1.91  
1.88  
1.85  
1.82  
1.79  
1.76  
1.73  
1.70  
1.67  
1.64  
1.61  
1.58  
1.55  
1.52  
1.50  
1.47  
1.44  
1.41  
1.38  
1.35  
1.32  
1.29  
1.26  
1.23  
1.20  
1.17  
1.14  
1.11  
1.08  
1.05  
1.02  
1.00  
0.97  
0.94  
0.91  
0.88  
0.85  
0.82  
0.79  
0.76  
0.73  
0.70  
0.67  
0.64  
0.61  
0.58  
0.55  
0.52  
0.50  
0.47  
0.44  
0.41  
0.38  
0.35  
0.32  
0.29  
0.26  
0.23  
0.20  
0.17  
0.14  
0.11  
0.08  
0.05  
0.02  
0.00  
-0.03  
-0.06  
-0.09  
-0.12  
-0.15  
-0.18  
-0.21  
-0.24  
-0.27  
-0.30  
-0.33  
-0.36  
-0.39  
-0.42  
-0.45  
-0.48  
-0.51  
-0.54  
-0.57  
-0.60  
-0.63  
-0.66  
-0.69  
-0.72  
-0.75  
-0.78  
-0.81  
-0.84  
-0.87  
-0.90  
-0.93  
-0.96  
-0.99  
-1.02  
-1.05  
-1.08  
-1.11  
-1.14  
-1.17  
-1.20  
-1.23  
-1.26  
-1.29  
-1.32  
-1.35  
-1.38  
-1.41  
-1.44  
-1.47  
-1.50  
-1.53  
-1.56  
-1.59  
-1.62  
-1.65  
-1.68  
-1.71  
-1.74  
-1.77  
-1.80  
-1.83  
-1.86  
-1.89  
-1.92  
-1.95  
-1.98  
-2.01  
-2.04  
-2.07  
-2.10  
-2.13  
-2.16  
-2.19  
-2.22  
-2.25  
-2.28  
-2.31  
-2.34  
-2.37  
-2.40  
-2.43  
-2.46  
-2.49  
-2.52  
-2.55  
-2.58  
-2.61  
-2.64  
-2.67  
-2.70  
-2.73  
-2.76  
-2.79  
-2.82  
-2.85  
-2.88  
-2.91  
-2.94  
-2.97  
-3.00  
-3.03  
-3.06  
-3.09  
-3.12  
-3.15  
-3.18  
-3.21  
-3.24  
-3.27  
-3.30  
-3.33  
-3.36  
-3.39  
-3.42  
-3.45  
-3.48  
-3.51  
-3.54  
-3.57  
-3.60  
-3.63  
-3.66  
-3.69  
-3.72  
-3.75  
-3.78  
-3.81  
-3.84  
-3.87  
-3.90  
-3.93  
-3.96  
-3.99  
-4.02  
-4.05  
-4.08  
-4.11  
-4.14  
-4.17  
-4.20  
-4.23  
-4.26  
-4.29  
-4.32  
-4.35  
-4.38  
-4.41  
-4.44  
-4.47  
-4.50  
-4.53  
-4.56  
-4.59  
-4.62  
-4.65  
-4.68  
-4.71  
-4.74  
-4.77  
-4.80  
-4.83  
-4.86  
-4.89  
-4.92  
-4.95  
-4.98  
-5.01  
-5.04  
-5.07  
-5.10  
-5.13  
-5.16  
-5.19  
-5.22  
-5.25  
-5.28  
-5.31  
-5.34  
-5.37  
-5.40  
-5.43  
-5.46  
-5.49  
-5.52  
-5.55  
-5.58  
-5.61  
-5.64  
-5.67  
-5.70  
-5.73  
-5.76  
-5.79  
-5.82  
-5.85  
-5.88  
-5.91  
-5.94  
-5.97  
-6.00  
-6.03  
-6.06  
-6.09  
-6.12  
-6.15  
-6.18  
-6.21  
-6.24  
-6.27  
-6.30  
-6.33  
-6.36  
-6.39  
-6.42  
-6.45  
-6.48  
-6.51  
-6.54  
-6.57  
-6.60  
-6.63  
-6.66  
-6.69  
-6.72  
-6.75  
-6.78  
-6.81  
-6.84  
-6.87  
-6.90  
-6.93  
-6.96  
-6.99  
-7.02  
-7.05  
-7.08  
-7.11  
-7.14  
-7.17  
-7.20  
-7.23  
-7.26  
-7.29  
-7.32  
-7.35  
-7.38  
-7.41  
-7.44  
-7.47  
-7.50  
-7.53  
-7.56  
-7.59  
-7.62  
-7.65  
-7.68  
-7.71  
-7.74  
-7.77  
-7.80  
-7.83  
-7.86  
-7.89  
-7.92  
-7.95  
-7.98  
-8.01  
-8.04  
-8.07  
-8.10  
-8.13  
-8.16  
-8.19  
-8.22  
-8.25  
-8.28  
-8.31  
-8.34  
-8.37  
-8.40  
-8.43  
-8.46  
-8.49  
-8.52  
-8.55  
-8.58  
-8.61  
-8.64  
-8.67  
-8.70  
-8.73  
-8.76  
-8.79  
-8.82  
-8.85  
-8.88  
-8.91  
-8.94  
-8.97  
-9.00  
-9.03  
-9.06  
-9.09  
-9.12  
-9.15  
-9.18  
-9.21  
-9.24  
-9.27  
-9.30  
-9.33  
-9.36  
-9.39  
-9.42  
-9.45  
-9.48  
-9.51  
-9.54  
-9.57  
-9.60  
-9.63  
-9.66  
-9.69  
-9.72  
-9.75  
-9.78  
-9.81  
-9.84  
-9.87  
-9.90  
-9.93  
-9.96  
-9.99  
-10.02  
-10.05  
-10.08  
-10.11  
-10.14  
-10.17  
-10.20  
-10.23  
-10.26  
-10.29  
-10.32  
-10.35  
-10.38  
-10.41  
-10.44  
-10.47  
-10.50  
-10.53  
-10.56  
-10.59  
-10.62  
-10.65  
-10.68  
-10.71  
-10.74  
-10.77  
-10.80  
-10.83  
-10.86  
-10.89  
-10.92  
-10.95  
-10.98  
-11.01  
-11.04  
-11.07  
-11.10  
-11.13  
-11.16  
-11.19  
-11.22  
-11.25  
-11.28  
-11.31  
-11.34  
-11.37  
-11.40  
-11.43  
-11.46  
-11.49  
-11.52  
-11.55  
-11.58  
-11.61  
-11.64  
-11.67  
-11.70  
-11.73  
-11.76  
-11.79  
-11.82  
-11.85  
-11.88  
-11.91  
-11.94  
-11.97  
-12.00  
-12.03  
-12.06  
-12.09  
-12.12  
-12.15  
-12.18  
-12.21  
-12.24  
-12.27  
-12.30  
-12.33  
-12.36  
-12.39  
-12.42  
-12.45  
-12.48  
-12.51  
-12.54  
-12.57  
-12.60  
-12.63  
-12.66  
-12.69  
-12.72  
-12.75  
-12.78  
-12.81  
-12.84  
-12.87  
-12.90  
-12.93  
-12.96  
-12.99  
-13.02  
-13.05  
-13.08  
-13.11  
-13.14  
-13.17  
-13.20  
-13.23  
-13.26  
-13.29  
-13.32  
-13.35  
-13.38  
-13.41  
-13.44  
-13.47  
-13.50  
-13.53  
-13.56  
-13.59  
-13.62  
-13.65  
-13.68  
-13.71  
-13.74  
-13.77  
-13.80  
-13.83  
-13.86  
-13.89  
-13.92  
-13.95  
-13.98  
-14.01  
-14.04  
-14.07  
-14.10  
-14.13  
-14.16  
-14.19  
-14.22  
-14.25  
-14.28  
-14.31  
-14.34  
-14.37  
-14.40  
-14.43  
-14.46  
-14.49  
-14.52  
-14.55  
-14.58  
-14.61  
-14.64  
-14.67  
-14.70  
-14.73  
-14.76  
-14.79  
-14.82  
-14.85  
-14.88  
-14.91  
-14.94  
-14.97  
-15.00  
-15.03  
-15.06  
-15.09  
-15.12  
-15.15  
-15.18  
-15.21  
-15.24  
-15.27  
-15.30  
-15.33  
-15.36  
-15.39  
-15.42  
-15.45  
-15.48  
-15.51  
-15.54  
-15.57  
-15.60  
-15.63  
-15.66  
-15.69  
-15.72  
-15.75  
-15.78  
-15.81  
-15.84  
-15.87  
-15.90  
-15.93  
-15.96  
-15.99  
-16.02  
-16.05  
-16.08  
-16.11  
-16.14  
-16.17  
-16.20  
-16.23  
-16.26  
-16.29  
-16.32  
-16.35  
-16.38  
-16.41  
-16.44  
-16.47  
-16.50  
-16.53  
-16.56  
-16.59  
-16.62  
-16.65  
-16.68  
-16.71  
-16.74  
-16.77  
-16.80  
-16.83  
-16.86  
-16.89  
-16.92  
-16.95  
-16.98  
-17.01  
-17.04  
-17.07  
-17.10  
-17.13  
-17.16  
-17.19  
-17.22  
-17.25  
-17.28  
-17.31  
-17.34  
-17.37  
-17.40  
-17.43  
-17.46  
-17.49  
-17.52  
-17.55  
-17.58  
-17.61  
-17.64  
-17.67  
-17.70  
-17.73  
-17.76  
-17.79  
-17.82  
-17.85  
-17.88  
-17.91  
-17.94  
-17.97  
-18.00  
-18.03  
-18.06  
-18.09  
-18.12  
-18.15  
-18.18  
-18.21  
-18.24  
-18.27  
-18.30  
-18.33  
-18.36  
-18.39  
-18.42  
-18.45  
-18.48  
-18.51  
-18.54  
-18.57  
-18.60  
-18.63  
-18.66  
-18.69  
-18.72  
-18.75  
-18.78  
-18.81  
-18.84  
-18.87  
-18.90  
-18.93  
-18.96  
-18.99  
-19.02  
-19.05  
-19.08  
-19.11  
-19.14  
-19.17  
-19.20  
-19.23  
-19.26  
-19.29  
-19.32  
-19.35  
-19.38  
-19.41  
-19.44  
-19.47  
-19.50  
-19.53  
-19.56  
-19.59  
-19.62  
-19.65  
-19.68  
-19.71  
-19.74  
-19.77  
-19.80  
-19.83  
-19.86  
-19.89  
-19.92  
-19.95  
-19.98  
-20.01  
-20.04  
-20.07  
-20.10  
-20.13  
-20.16  
-20.19  
-20.22  
-20.25  
-20.28  
-20.31  
-20.34  
-20.37  
-20.40  
-20.43  
-20.46  
-20.49  
-20.52  
-20.55  
-20.58  
-20.61  
-20.64  
-20.67  
-20.70  
-20.73  
-20.76  
-20.79  
-20.82  
-20.85  
-20.88  
-20.91  
-20.94  
-20.97  
-21.00  
-21.03  
-21.06  
-21.09  
-21.12  
-21.15  
-21.18  
-21.21  
-21.24  
-21.27  
-21.30  
-21.33  
-21.36  
-21.39  
-21.42  
-21.45  
-21.48  
-21.51  
-21.54  
-21.57  
-21.60  
-21.63  
-21.66  
-21.69  
-21.72  
-21.75  
-21.78  
-21.81  
-21.84  
-21.87  
-21.90  
-21.93  
-21.96  
-21.99  
-22.02  
-22.05  
-22.08  
-22.11  
-22.14  
-22.17  
-22.20  
-22.23  
-22.26  
-22.29  
-22.32  
-22.35  
-22.38  
-22.41  
-22.44  
-22.47  
-22.50  
-22.53  
-22.56  
-22.59  
-22.62  
-22.65  
-22.68  
-22.71  
-22.74  
-22.77  
-22.80  
-22.83  
-22.86  
-22.89  
-22.92  
-22.95  
-22.98  
-23.01  
-23.04  
-23.07  
-23.10  
-23.13  
-23.16  
-23.19  
-23.22  
-23.25  
-23.28  
-23.31  
-23.34  
-23.37  
-23.40  
-23.43  
-23.46  
-23.49  
-23.52  
-23.55  
-23.58  
-23.61  
-23.64  
-23.67  
-23.70  
-23.73  
-23.76  
-23.79  
-23.82  
-23.85  
-23.88  
-23.91  
-23.94  
-23.97  
-24.00  
-24.03  
-24.06  
-24.09  
-24.12  
-24.15  
-24.18  
-24.21  
-24.24  
-24.27  
-24.30  
-24.33  
-24.36  
-24.39  
-24.42  
-24.45  
-24.48  
-24.51  
-24.54  
-24.57  
-24.60  
-24.63  
-24.66  
-24.69  
-24.72  
-24.75  
-24.78  
-24.81  
-24.84  
-24.87  
-24.90  
-24.93  
-24.96  
-25.00  
-25.03  
-25.06  
-25.09  
-25.12  
-25.15  
-25.18  
-25.21  
-25.24  
-25.27  
-25.30  
-25.33  
-25.36  
-25.39  
-25.42  
-25.45  
-25.48  
-25.51  
-25.54  
-25.57  
-25.60  
-25.63  
-25.66  
-25.69  
-25.72  
-25.75  
-25.78  
-25.81  
-25.84  
-25.87  
-25.90  
-25.93  
-25.96  
-26.00  
-26.03  
-26.06  
-26.09  
-26.12  
-26.15  
-26.18  
-26.21  
-26.24  
-26.27  
-26.30  
-26.33  
-26.36  
-26.39  
-26.42  
-26.45  
-26.48  
-26.51  
-26.54  
-26.57  
-26.60  
-26.63  
-26.66  
-26.69  
-26.72  
-26.75  
-26.78  
-26.81  
-26.84  
-26.87  
-26.90  
-26.93  
-26.96  
-27.00  
-27.03  
-27.06  
-27.09  
-27.12  
-27.15  
-27.18  
-27.21  
-27.24  
-27.27  
-27.30  
-27.33  
-27.36  
-27.39  
-27.42  
-27.45  
-27.48  
-27.51  
-27.54  
-27.57  
-27.60  
-27.63  
-27.66  
-27.69  
-27.72  
-27.75  
-27.78  
-27.81  
-27.84  
-27.87  
-27.90  
-27.93  
-27.96  
-28.00  
-28.03  
-28.06  
-28.09  
-28.12  
-28.15  
-28.18  
-28.21  
-28.24  
-28.27  
-28.30  
-28.33  
-28.36  
-28.39  
-28.42  
-28.45  
-28.48  
-28.51  
-28.54  
-28.57  
-28.60  
-28.63  
-28.66  
-28.69  
-28.72  
-28.75  
-28.78  
-28.81  
-28.84  
-28.87  
-28.90  
-28.93  
-28.96  
-29.00  
-29.03  
-29.06  
-29.09  
-29.12  
-29.15  
-29.18  
-29.21  
-29.24  
-29.27  
-29.30  
-29.33  
-29.36  
-29.39  
-29.42  
-29.45  
-29.48  
-29.51  
-29.54  
-29.57  
-29.60  
-29.63  
-29.66  
-29.69  
-29.72  
-29.75  
-29.78  
-29.81  
-29.84  
-29.87  
-29.90  
-29.93  
-29.96  
-30.00  
-30.03  
-30.06  
-30.09  
-30.12  
-30.15  
-30.18  
-30.21  
-30.24  
-30.27  
-30.30  
-30.33  
-30.36  
-30.39  
-30.42  
-30.45  
-30.48  
-30.51  
-30.54  
-30.57  
-30.60  
-30.63  
-30.66  
-30.69  
-30.72  
-30.75  
-30.78  
-30.81  
-30.84  
-30.87  
-30.90  
-30.93  
-30.96  
-31.00  
-31.03  
-31.06  
-31.09  
-31.12  
-31.15  
-31.18  
-31.21  
-31.24  
-31.27  
-31.30  
-31.33  
-31.36  
-31.39  
-31.42  
-31.45  
-31.48  
-31.51  
-31.54  
-31.57  
-31.60  
-31.63  
-31.66  
-31.69  
-31.72  
-31.75  
-31.78  
-31.81  
-31.84  
-31.87  
-31.90  
-31.93  
-31.96  
-32.00  
-32.03  
-32.06  
-32.09  
-32.12  
-32.15  
-32.18  
-32.21  
-32.24  
-32.27  
-32.30  
-32.33  
-32.36  
-32.39  
-32.42  
-32.45  
-32.48  
-32.51  
-32.54  
-32.57  
-32.60  
-32.63  
-32.66  
-32.69  
-32.72  
-32.75  
-32.78  
-32.81  
-32.84  
-32.87  
-32.90  
-32.93  
-32.96  
-33.00  
-33.03  
-33.06  
-33.09  
-33.12  
-33.15  
-33.18  
-33.21  
-33.24  
-33.27  
-33.30  
-33.33  
-33.36  
-33.39  
-33.42  
-33.45  
-33.48  
-33.51  
-33.54  
-33.57  
-33.60  
-33.63  
-33.66  
-33.69  
-33.72  
-33.75  
-33.78  
-33.81  
-33.84  
-33.87  
-33.90  
-33.93  
-33.96  
-34.00  
-34.03  
-34.06  
-34.09  
-34.12  
-34.15  
-34.18  
-34.21  
-34.24  
-34.27  
-34.30  
-34.33  
-34.36  
-34.39  
-34.42  
-34.45  
-34.48  
-34.51  
-34.54  
-34.57  
-34.60  
-34.63  
-34.66  
-34.69  
-34.72  
-34.75  
-34.78  
-34.81  
-34.84  
-34.87  
-34.90  
-34.93  
-34.96  
-35.00  
-35.03  
-35.06  
-35.09  
-35.12  
-35.15  
-35.18  
-35.21  
-35.24  
-35.27  
-35.30  
-35.33  
-35.36  
-35.39  
-35.42  
-35.45  
-35.48  
-35.51  
-35.54  
-35.57  
-35.60  
-35.63  
-35.66  
-35.69  
-35.72  
-35.75  
-35.78  
-35.81  
-35.84  
-35.87  
-35.90  
-35.93  
-35.96  
-36.00  
-36.03  
-36.06  
-36.09  
-36.12  
-36.15  
-36.18  
-36.21  
-36.24  
-36.27  
-36.30  
-36.33  
-36.36  
-36.39  
-36.42  
-36.45  
-36.48  
-36.51  
-36.54  
-36.57  
-36.60  
-36.63  
-36.66  
-36.69  
-36.72  
-36.75  
-36.78  
-36.81  
-36.84  
-36.87  
-36.90  
-36.93  
-36.96  
-37.00  
-37.03  
-37.06  
-37.09  
-37.12  
-37.15  
-37.18  
-37.21  
-37.24  
-37.27  
-37.30  
-37.33  
-37.36  
-37.39  
-37.42  
-37.45  
-37.48  
-37.51  
-37.54  
-37.57  
-37.60  
-37.63  
-37.66  
-37.69  
-37.72  
-37.75  
-37.78  
-37.81  
-37.84  
-37.87  
-37.90  
-37.93  
-37.96  
-38.00  
-38.03  
-38.06  
-38.09  
-38.12  
-38.15  
-38.18  
-38.21  
-38.24  
-38.27  
-38.30  
-38.33  
-38.36  
-38.39  
-38.42  
-38.45  
-38.48  
-38.51  
-38.54  
-38.57  
-38.60  
-38.63  
-38.66  
-38.69  
-38.72  
-38.75  
-38.78  
-38.81  
-38.84  
-38.87  
-38.90  
-38.93  
-38.96  
-39.00  
-39.03  
-39.06  
-39.09  
-39.12  
-39.15  
-39.18  
-39.21  
-39.24  
-39.27  
-39.30  
-39.33  
-39.36  
-39.39  
-39.42  
-39.45  
-39.48  
-39.51  
-39.54  
-39.57  
-39.60  
-39.63  
-39.66  
-39.69  
-39.72  
-39.75  
-39.78  
-39.81  
-39.84  
-39.87  
-39.90  
-39.93  
-39.96  
-40.00  
-40.03  
-40.06  
-40.09  
-40.12  
-40.15  
-40.18  
-40.21  
-40.24  
-40.27  
-40.30  
-40.33  
-40.36  
-40.39  
-40.42  
-40.45  
-40.48  
-40.51  
-40.54  
-40.57  
-40.60  
-40.63  
-40.66  
-40.69  
-40.72  
-40.75  
-40.78  
-40.81  
-40.84  
-40.87  
-40.90  
-40.93  
-40.96  
-41.00  
-41.03  
-41.

17151058.11.1.1r  
SLC:LNB:LB-001-44D  
Carbon.dur CDCl3 /home/nmr/localdata/backup 49

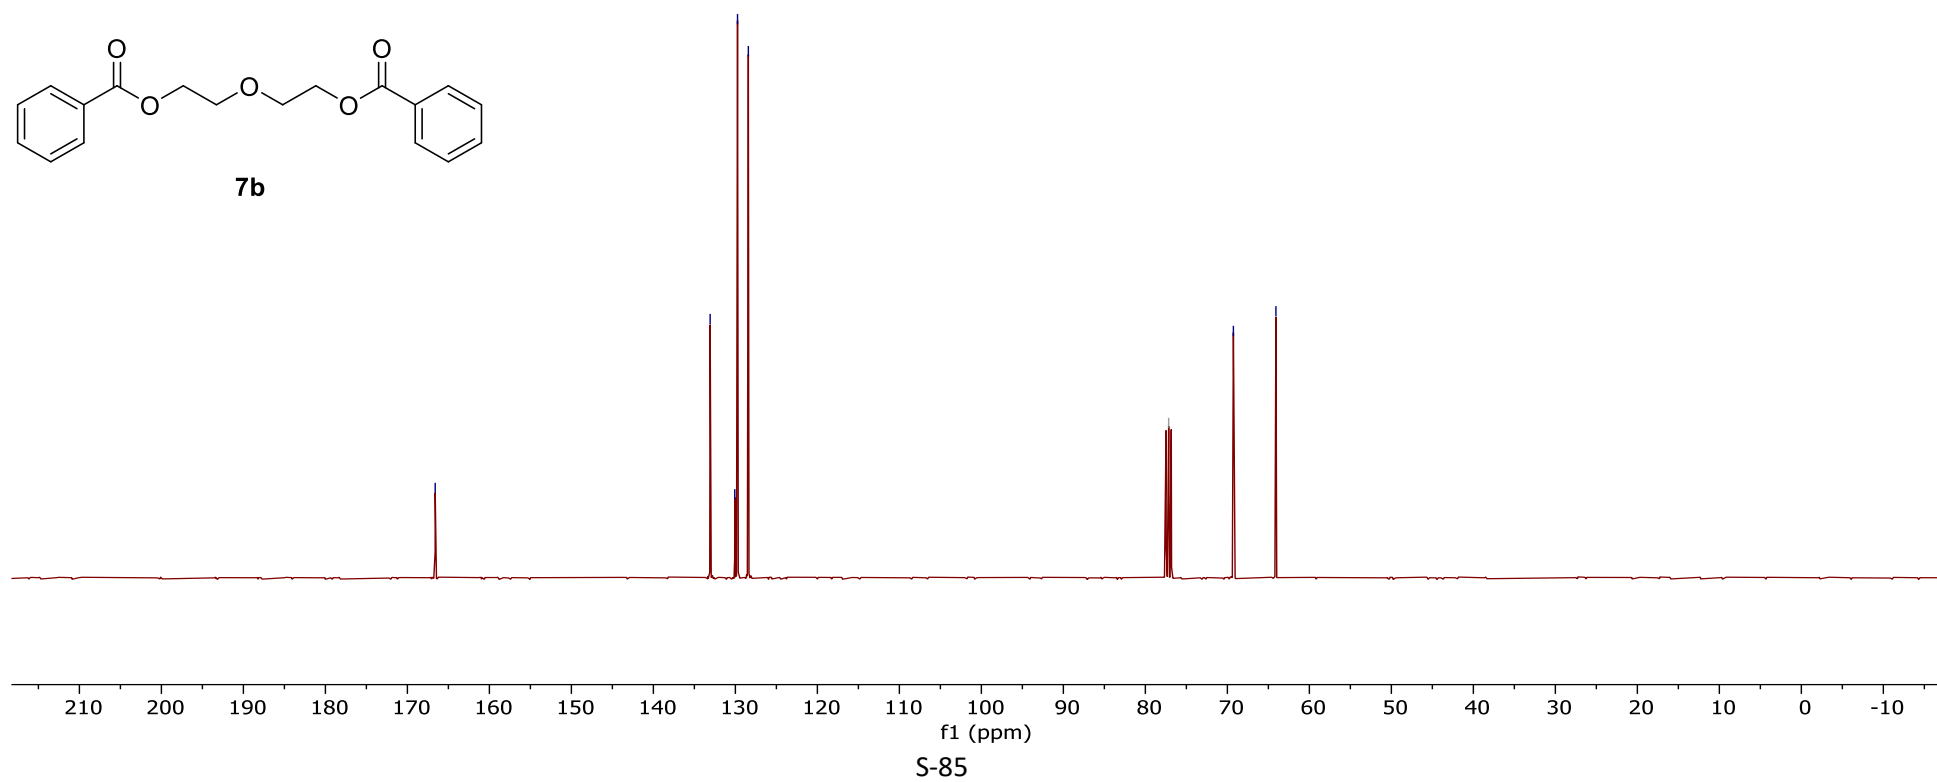

11114603.10.1.1r  
SLC:LNB:LB-001-44A-DRY  
Proton1.icon CDCl3 /home/nmr/localdata/walkup/45

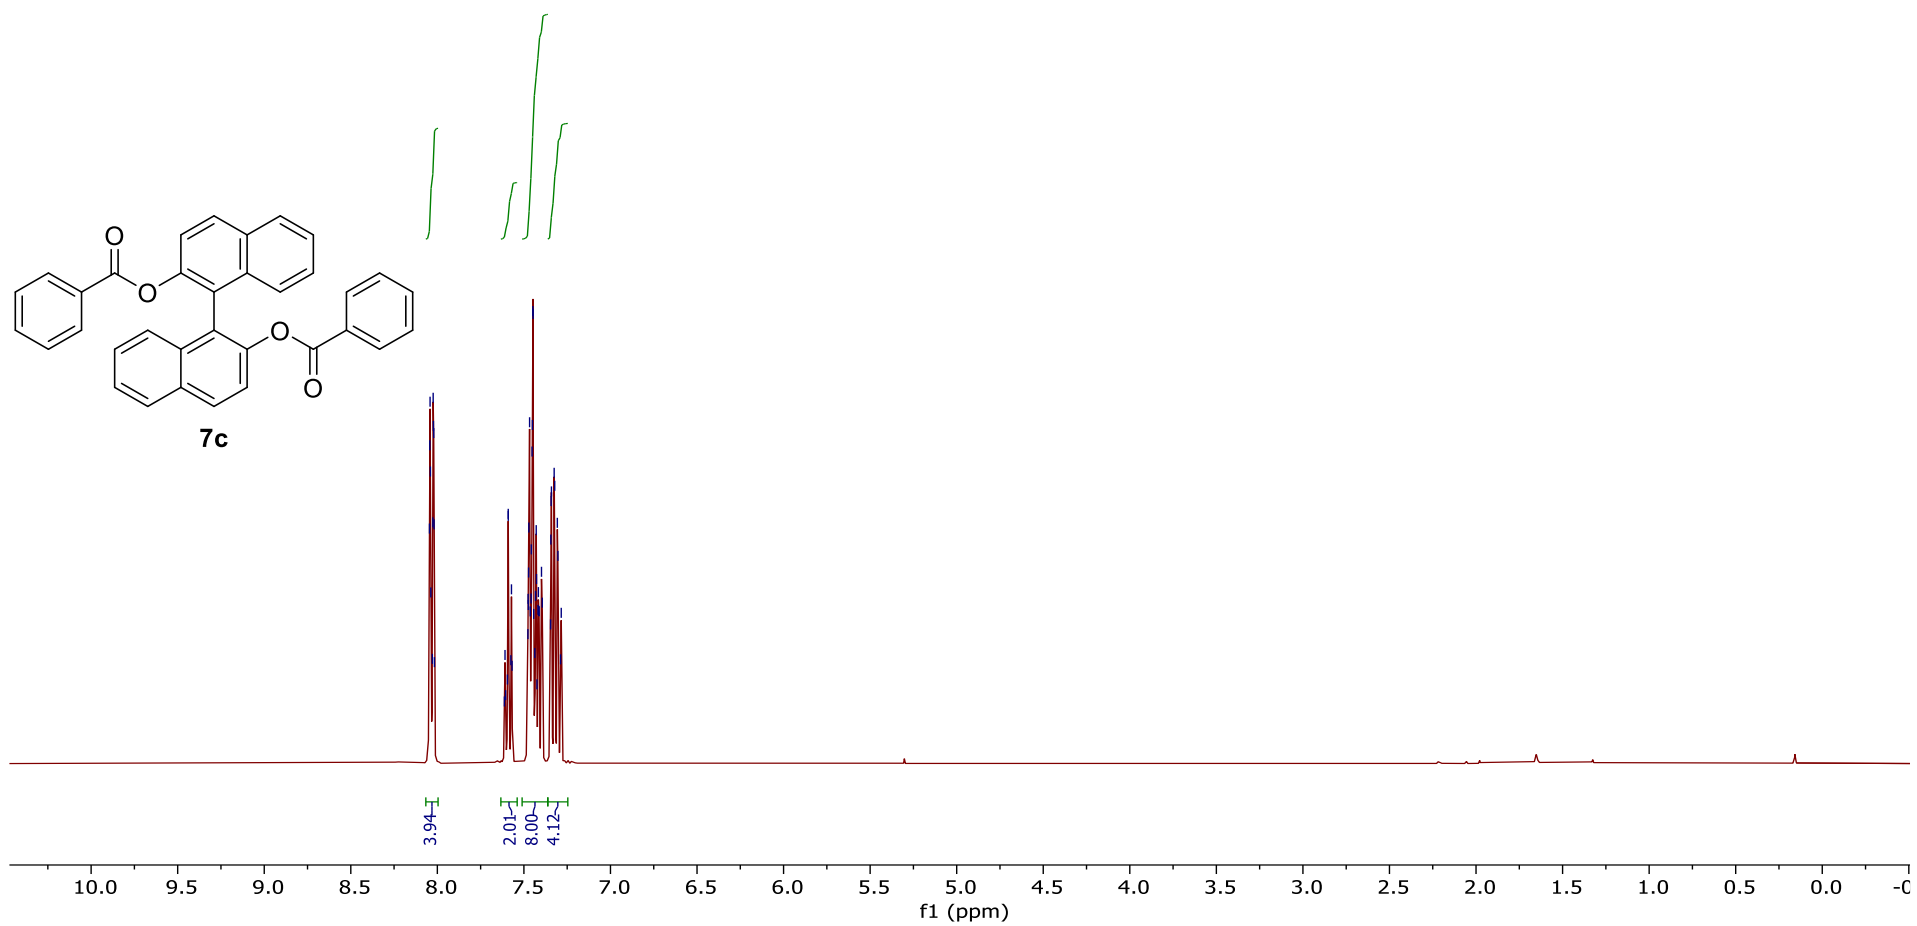

11114603.11.1.1r  
SLC:LNB:LB-001-44A-DRY  
Carbon.dur CDCl3 /home/nmr/localdata

166.99

148.43

133.48

131.30

130.67

130.10

129.44

129.12

128.50

126.04

77.16 CDCl3

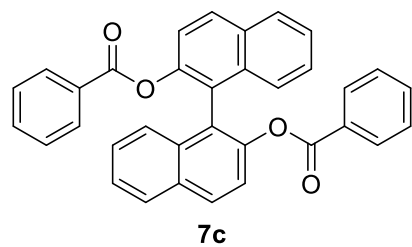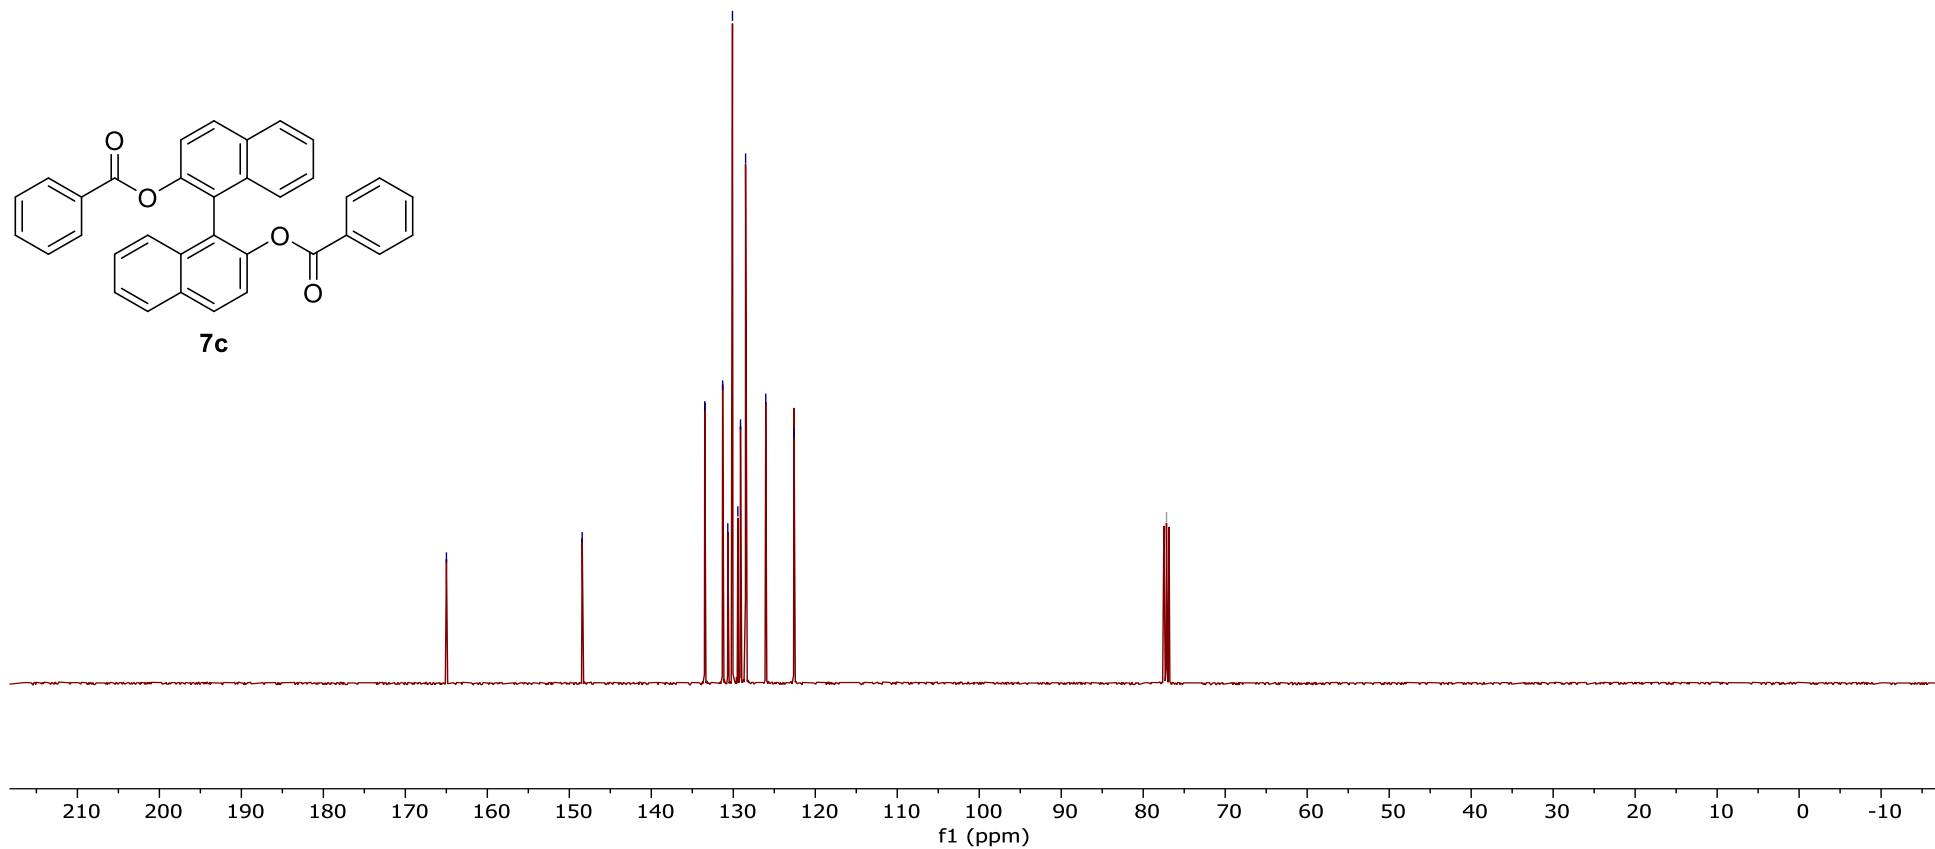

PROTON\_02  
SLC:LNB:LB-127

2.50 DMSO-d6

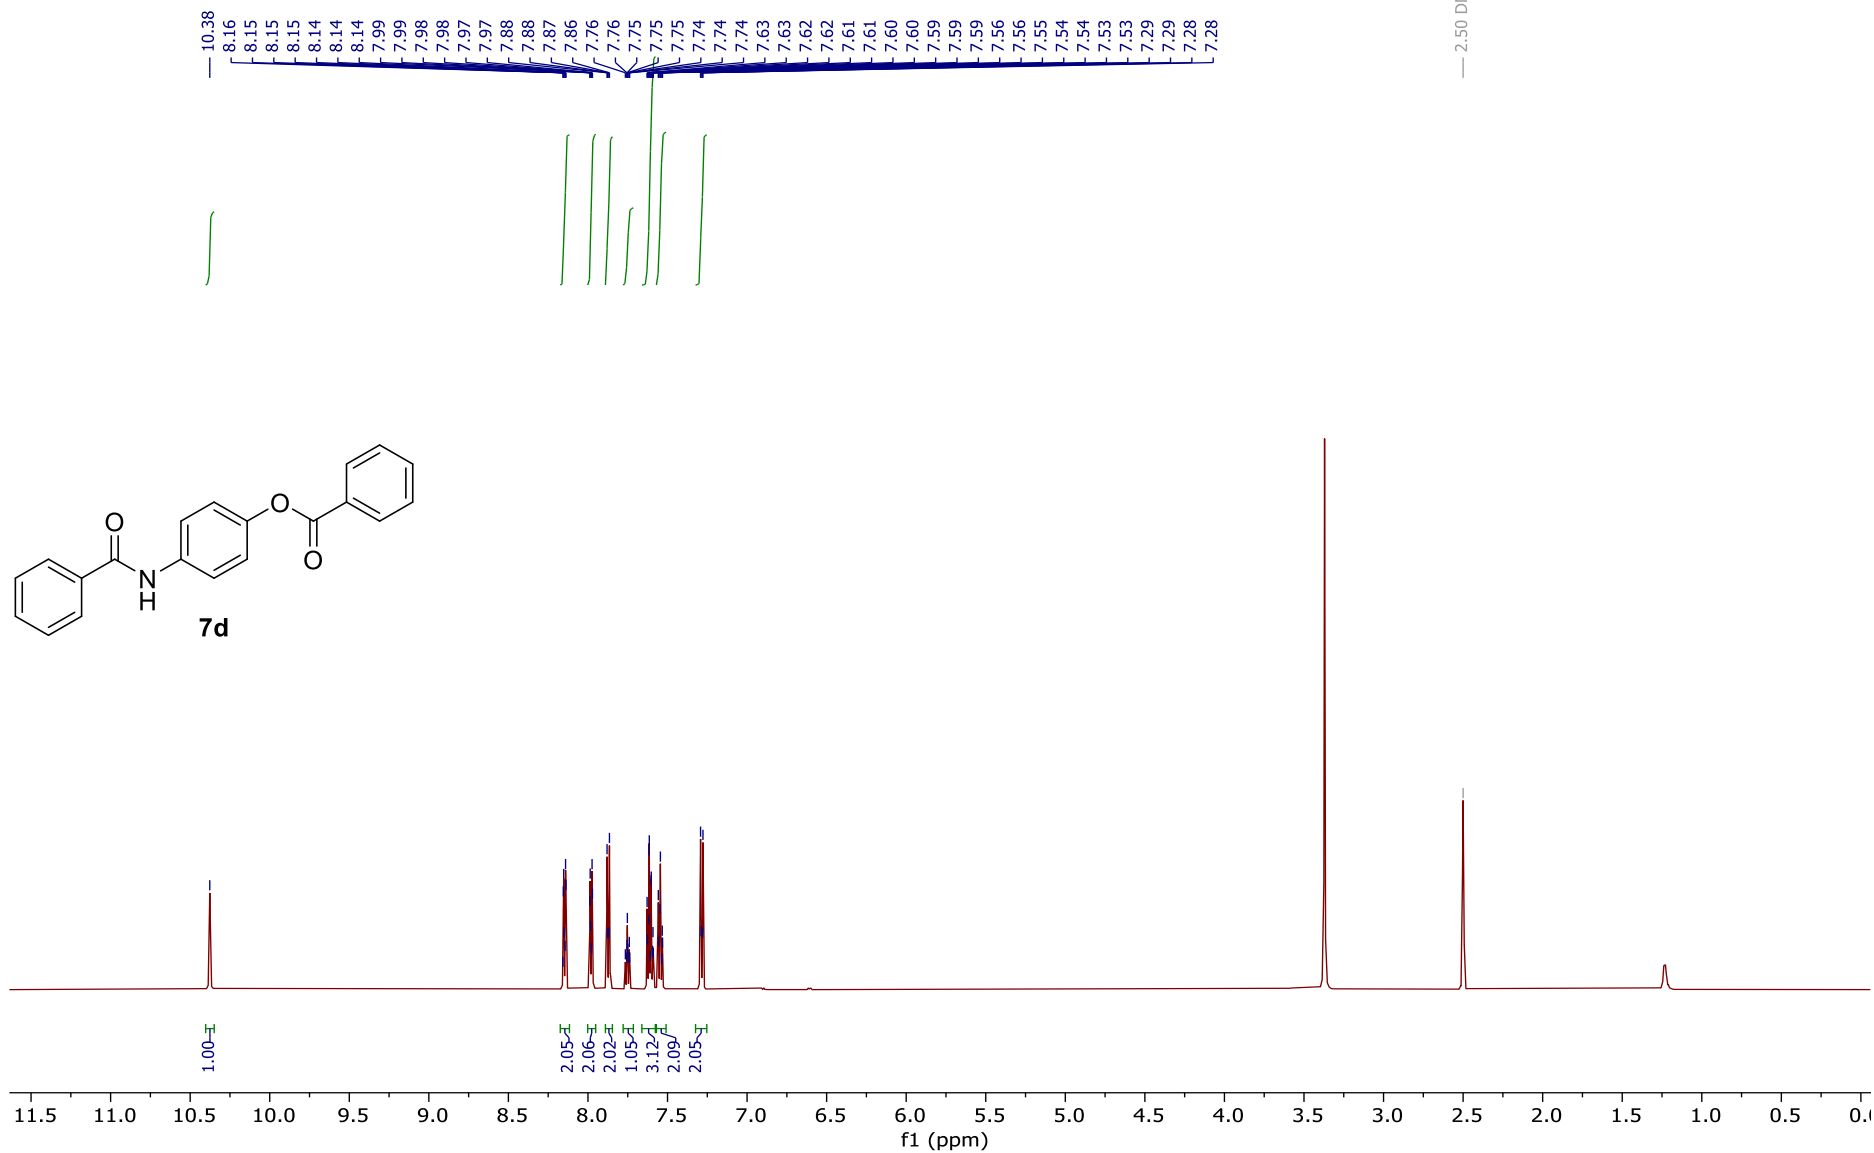

S-88



CARBON\_01  
SLC:LNB:LB-127

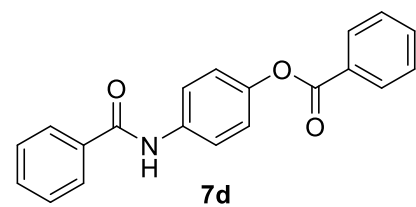

165.60  
164.78

146.31

136.99  
134.86  
134.02  
131.63  
129.77  
128.98  
128.42  
127.67  
121.98  
121.34

39.52 DMSO-d6

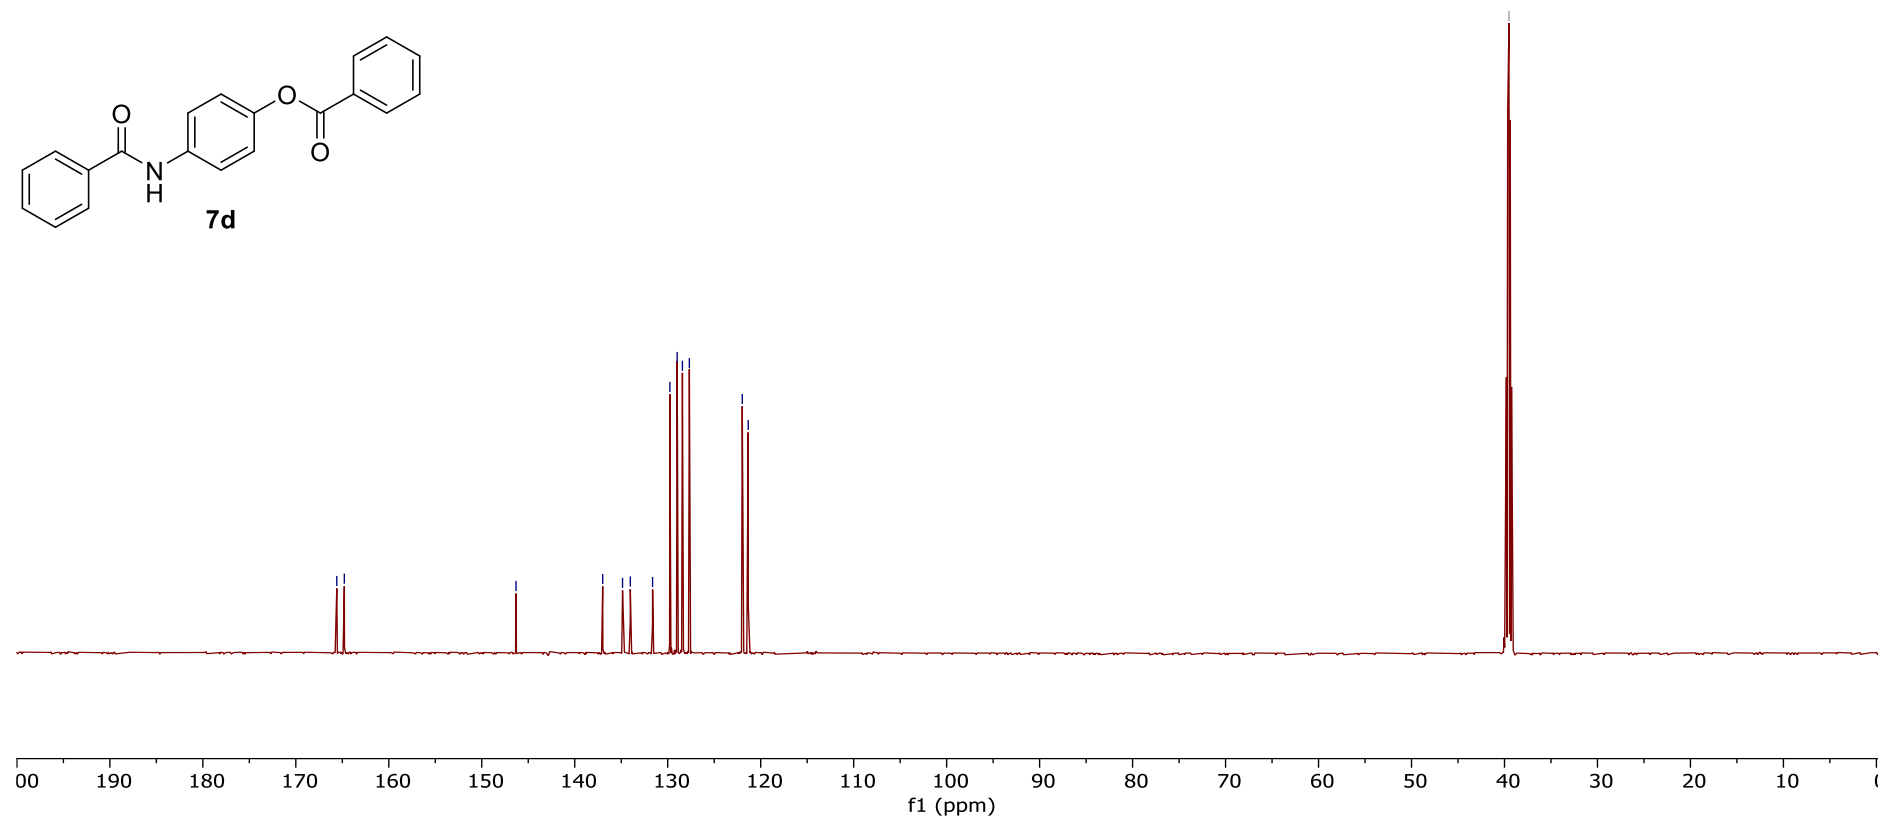

23133548.10.fid  
SLC:LNB:LB-001-43B-PURIFY3  
Proton1.icon CDCl3 /home/nmr/localdata walkup 55

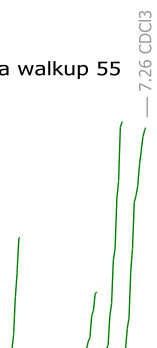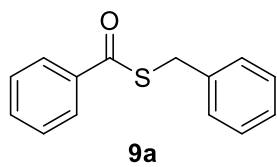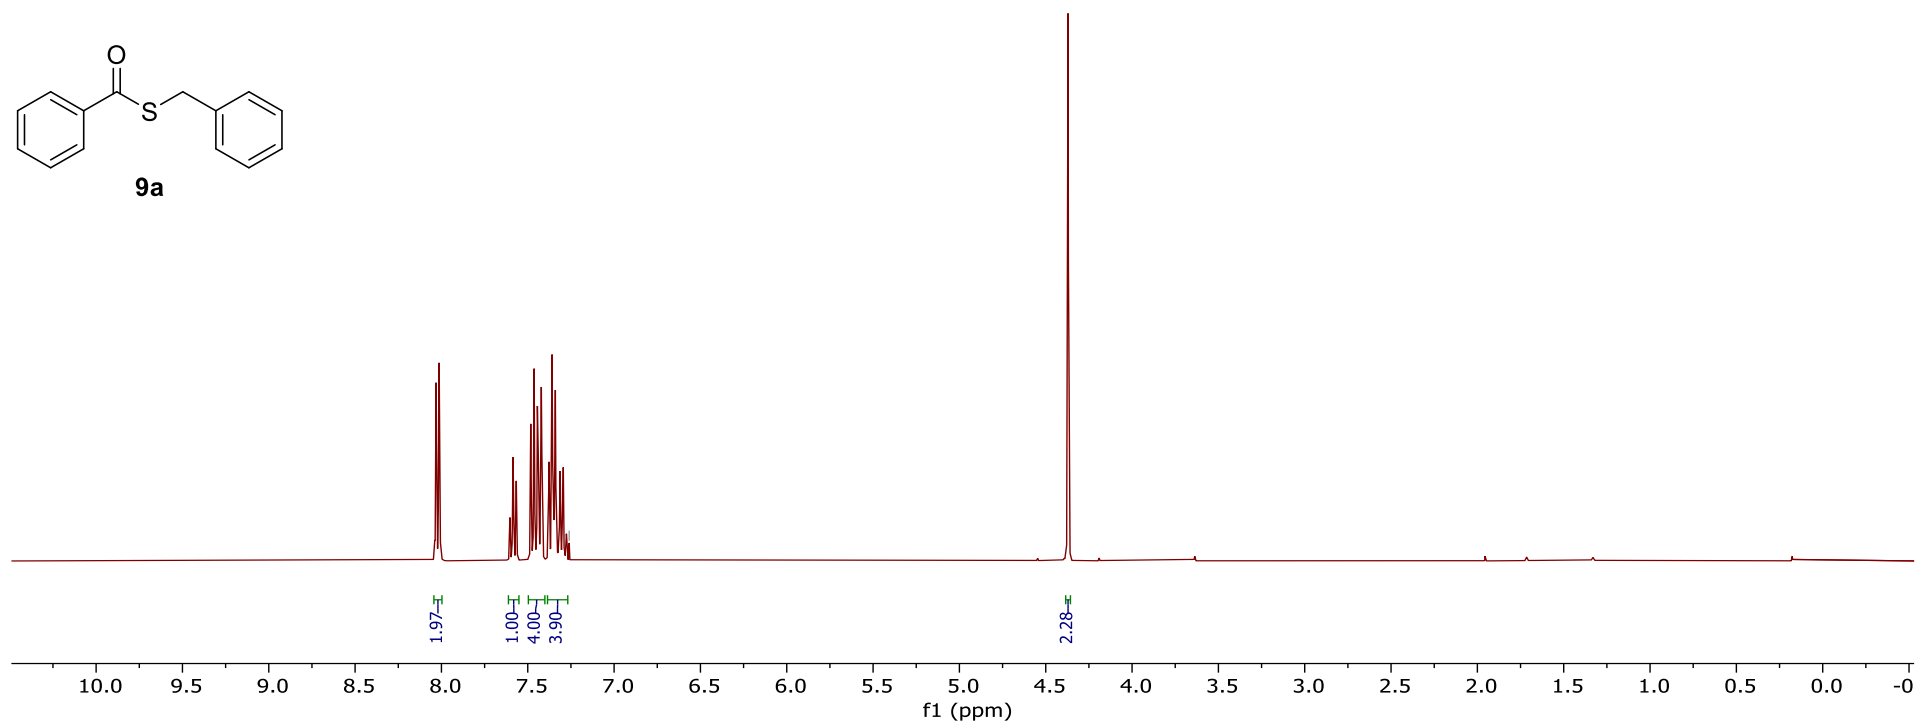

S-90

23133548.11.fid  
SLC:LNB:LB-001-43B\_PURIFY3  
Carbon.dur CDCl3 / Home/nmr/localdata walkup 55

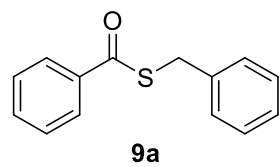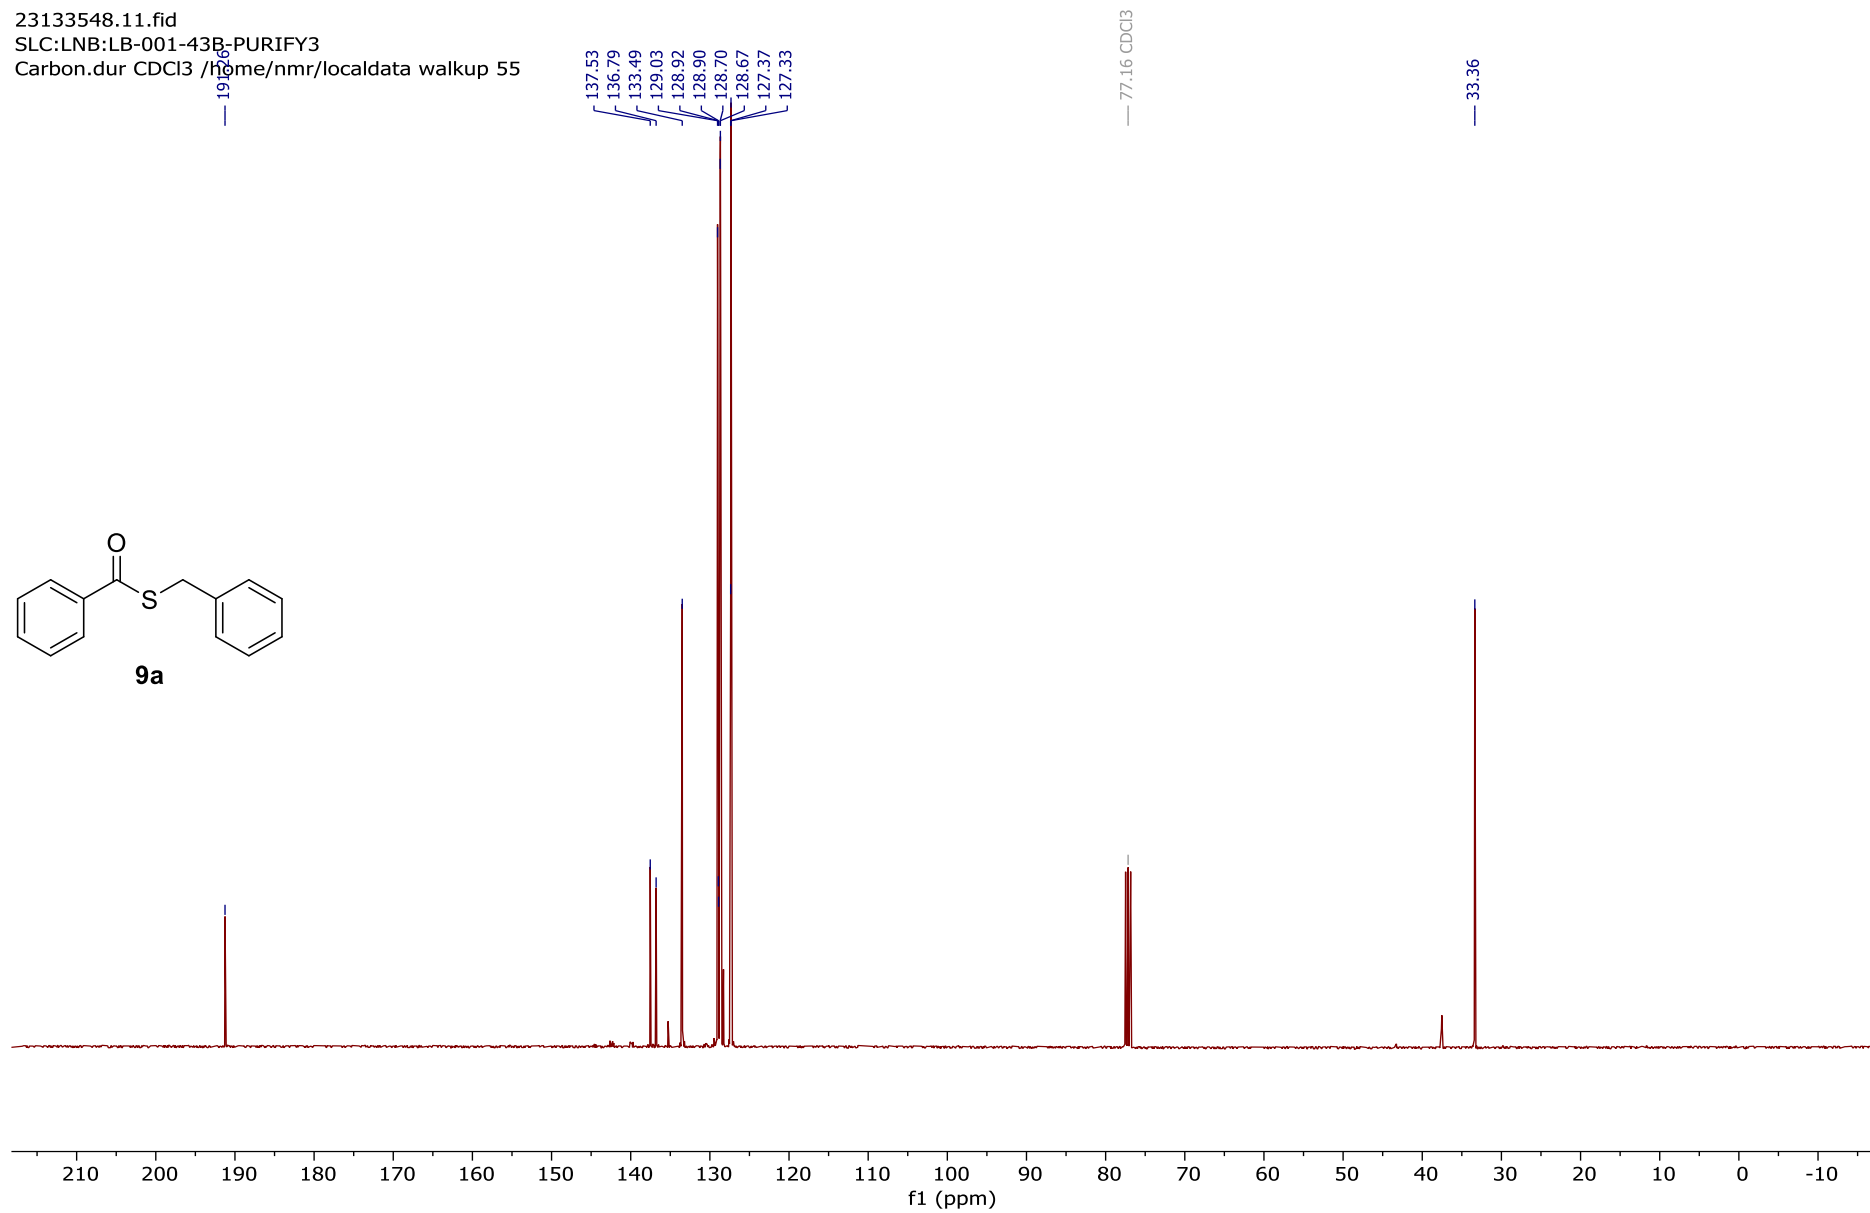

10160819.10.1.1r

SLC:LNB:LB-001-43C-PURIFY

Proton.dur CDCl3 /home/.../.../...

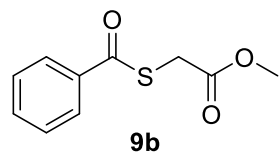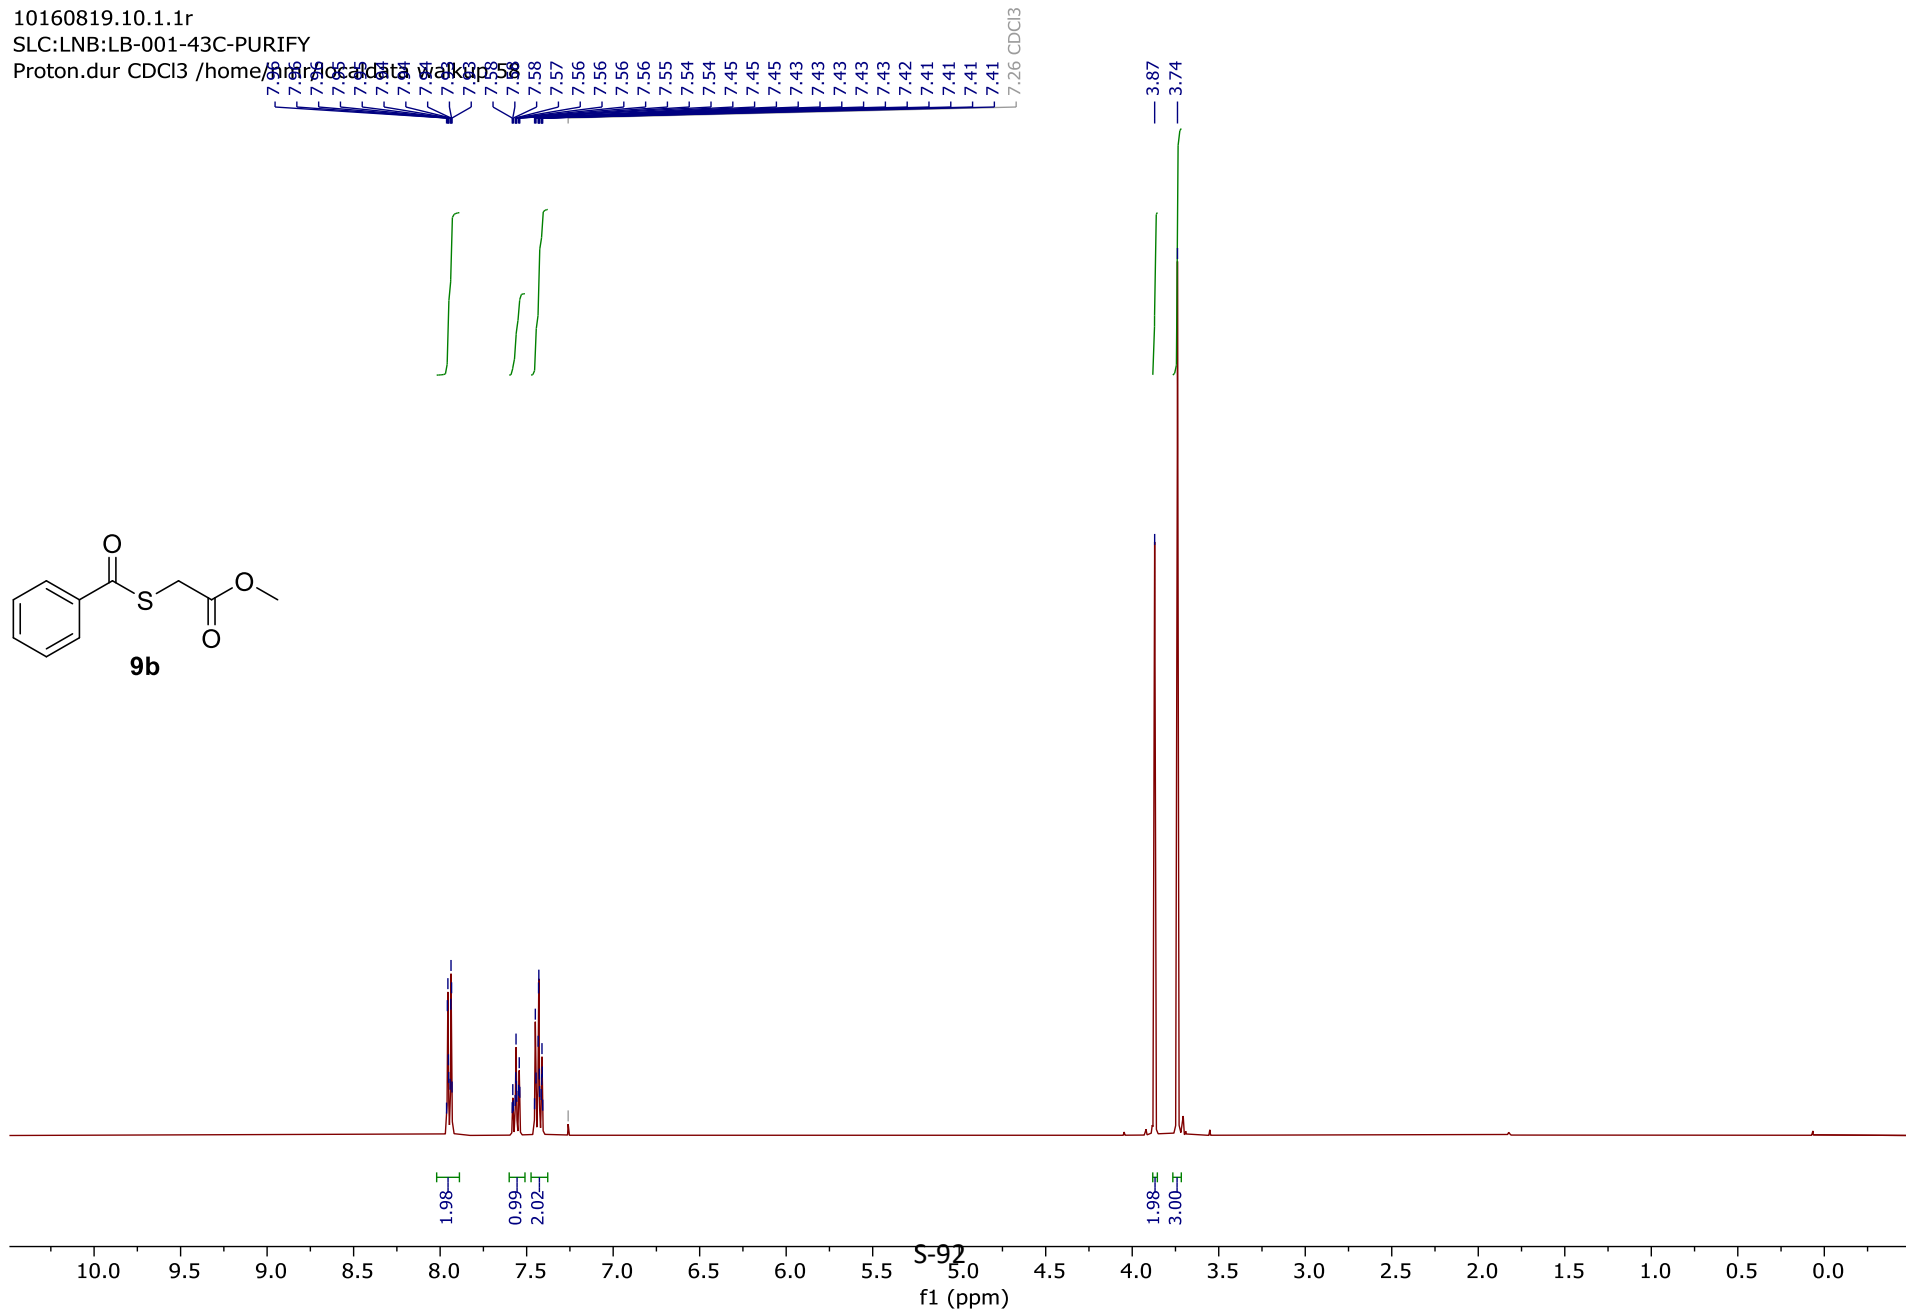

10160819.14.1.1r  
SLC:LNB:LB-001-43C-PURIFY  
Carbon\_10min.dur CDCl3 /home/nmr/localdata walkup 58

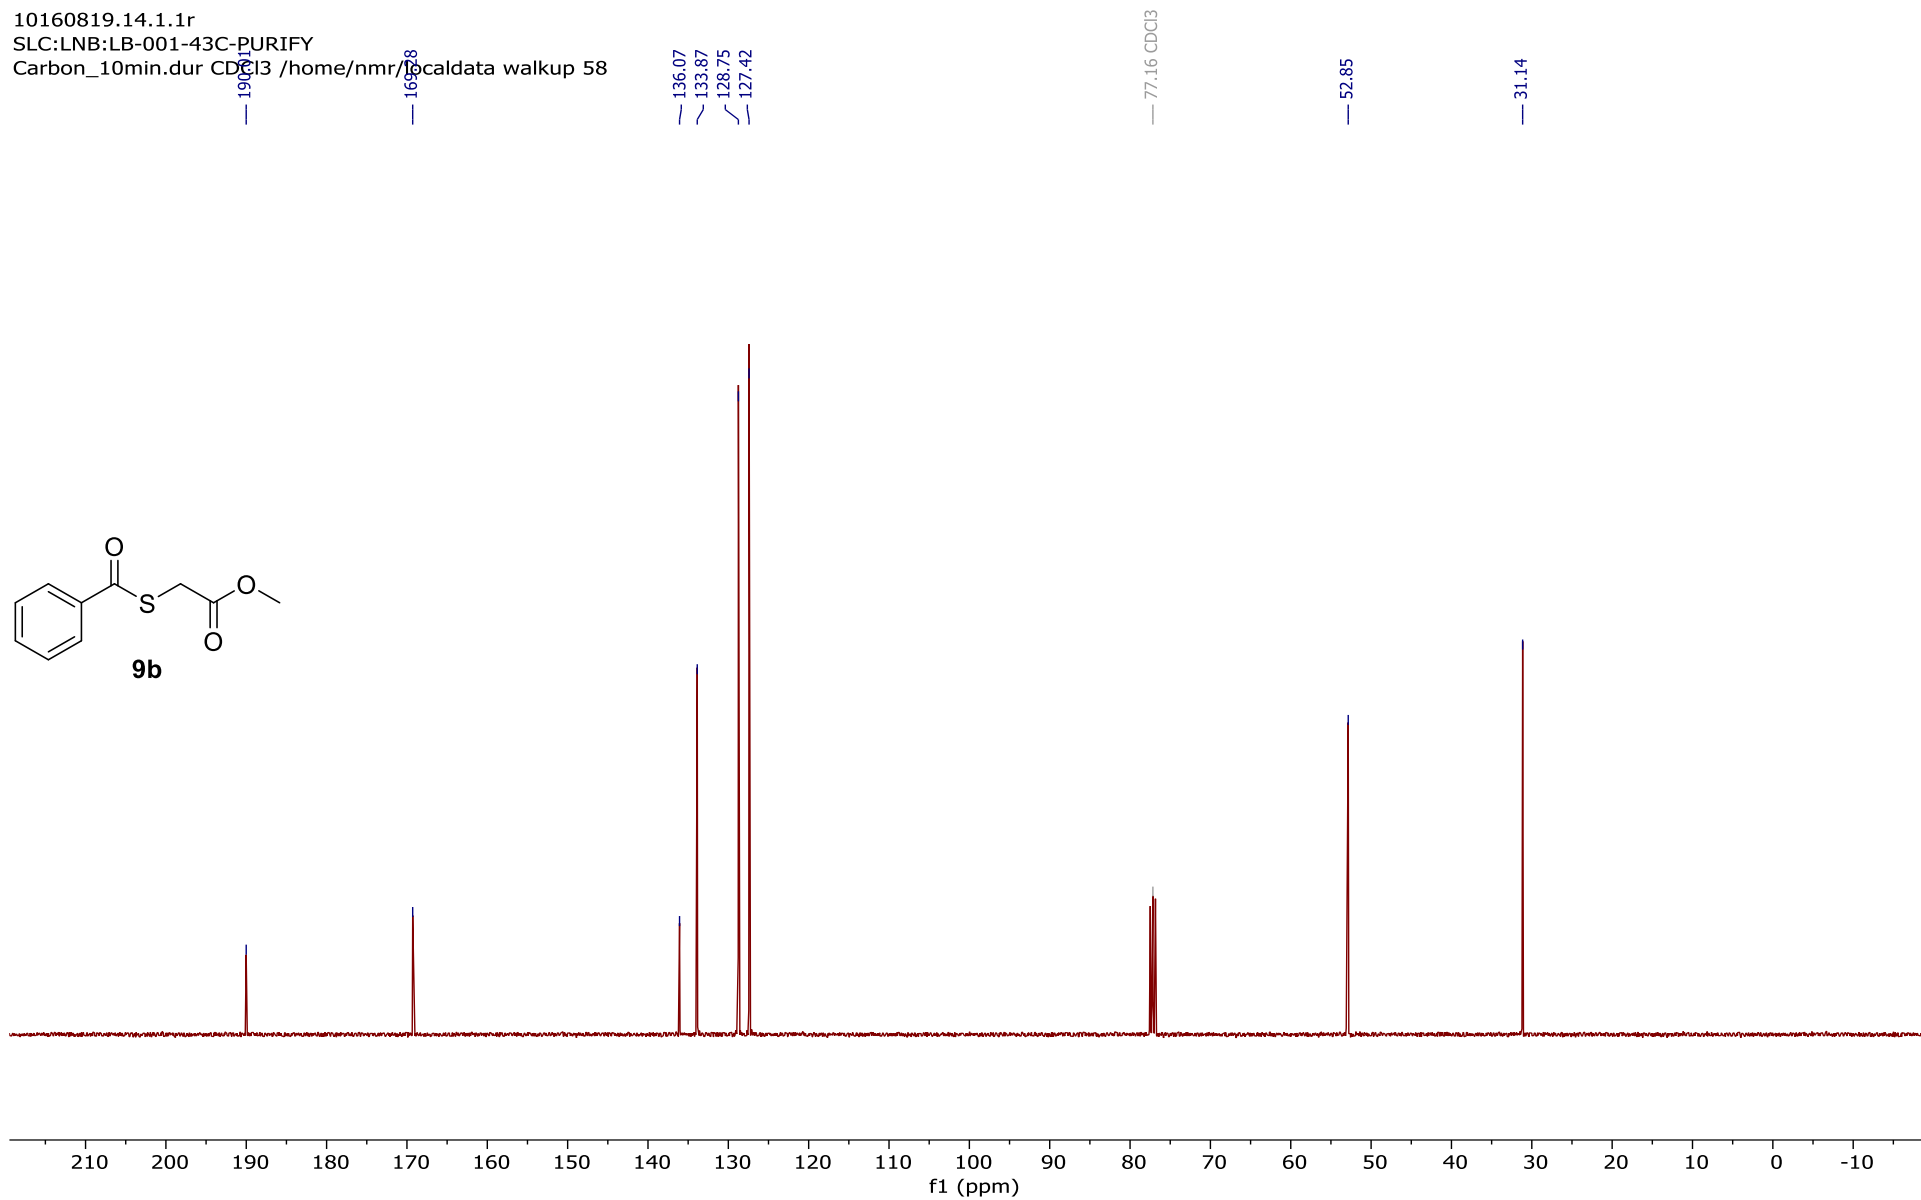

15133500.10.1.1r  
SLC:LNB:LB-001-43D-PURIFY2  
Proton 1 in CDCl3

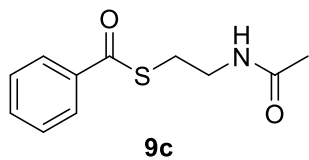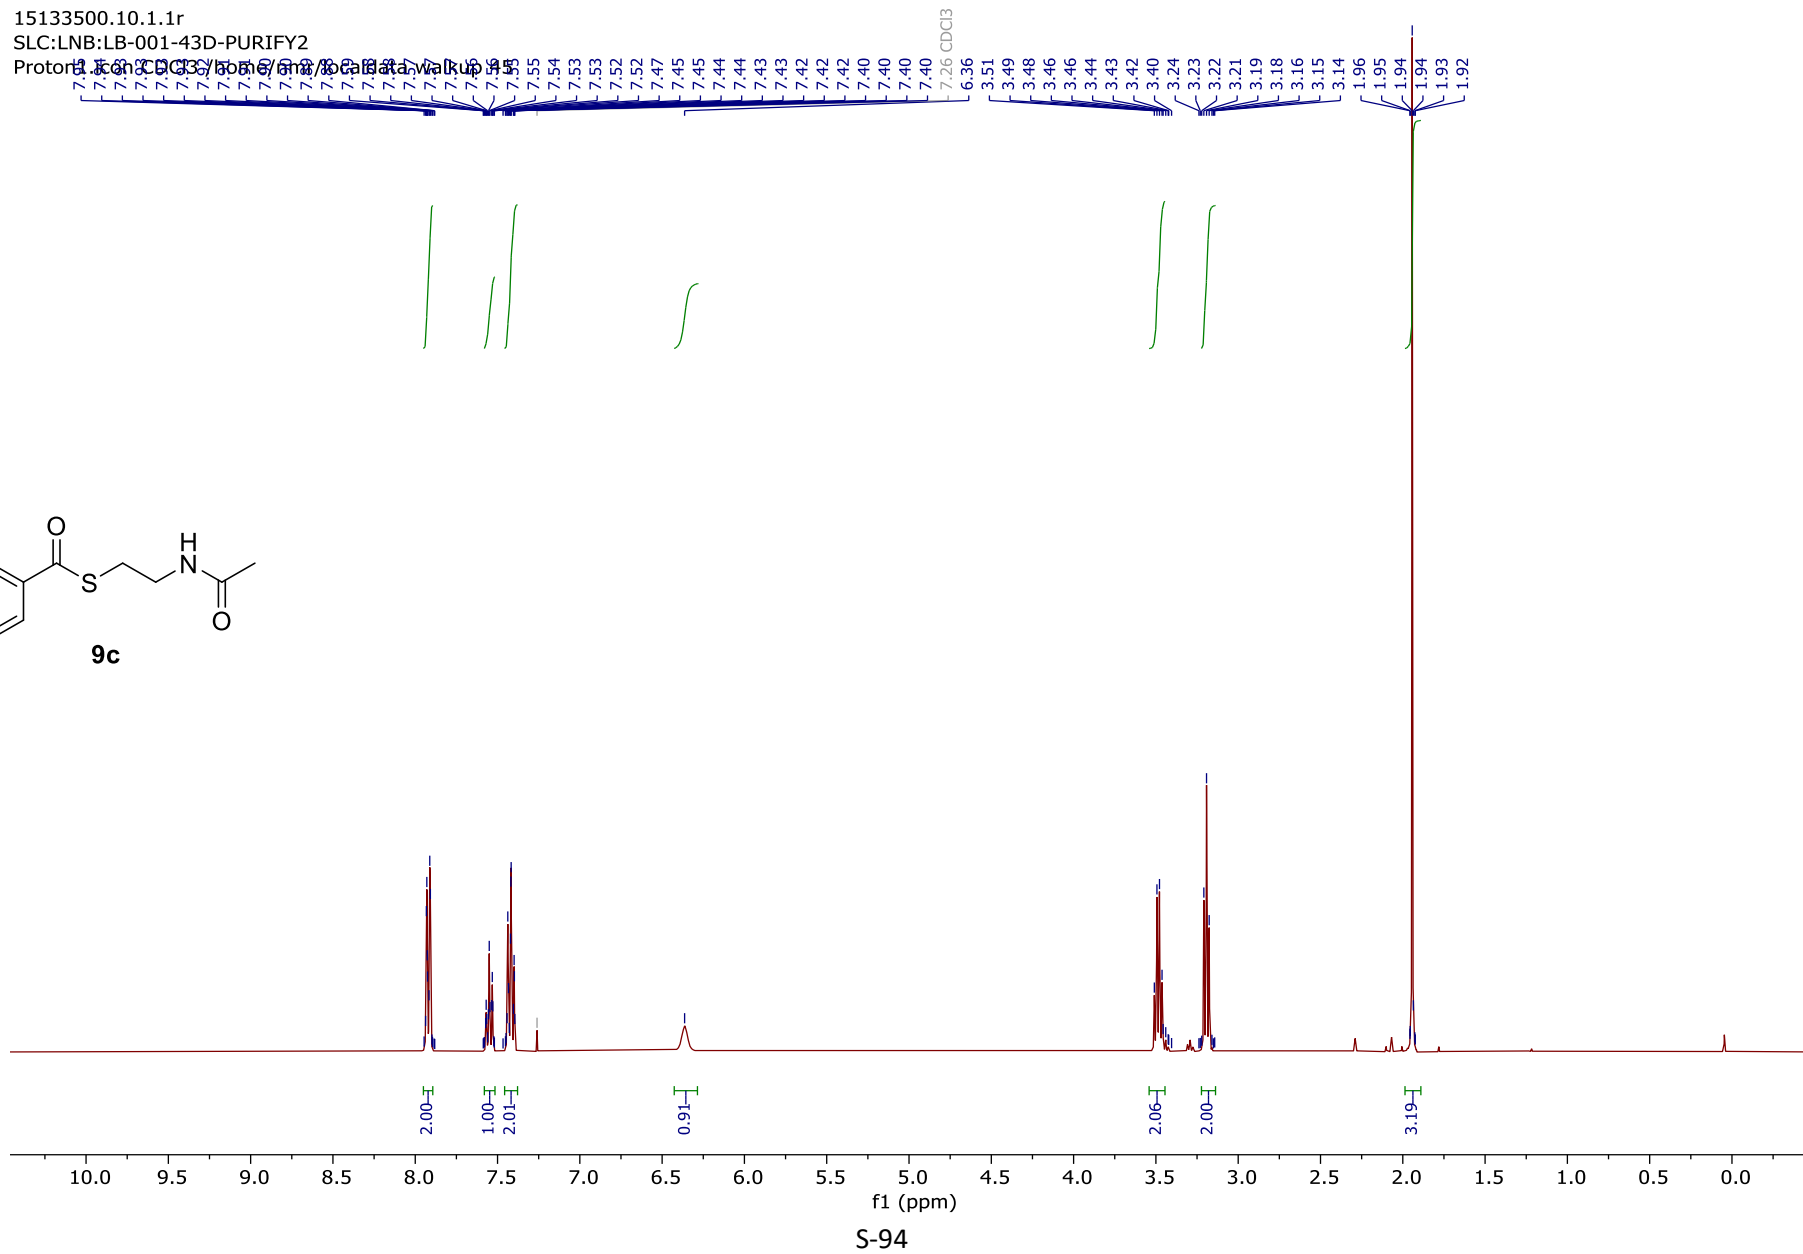

15133500.11.1.1r  
SLC:LNB:LB-001-43D-PURIFY2  
Carbon.dur CDCl3 // Home/nmr/localdata walkup 45

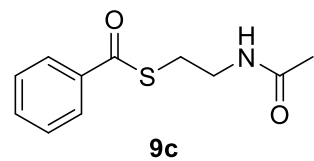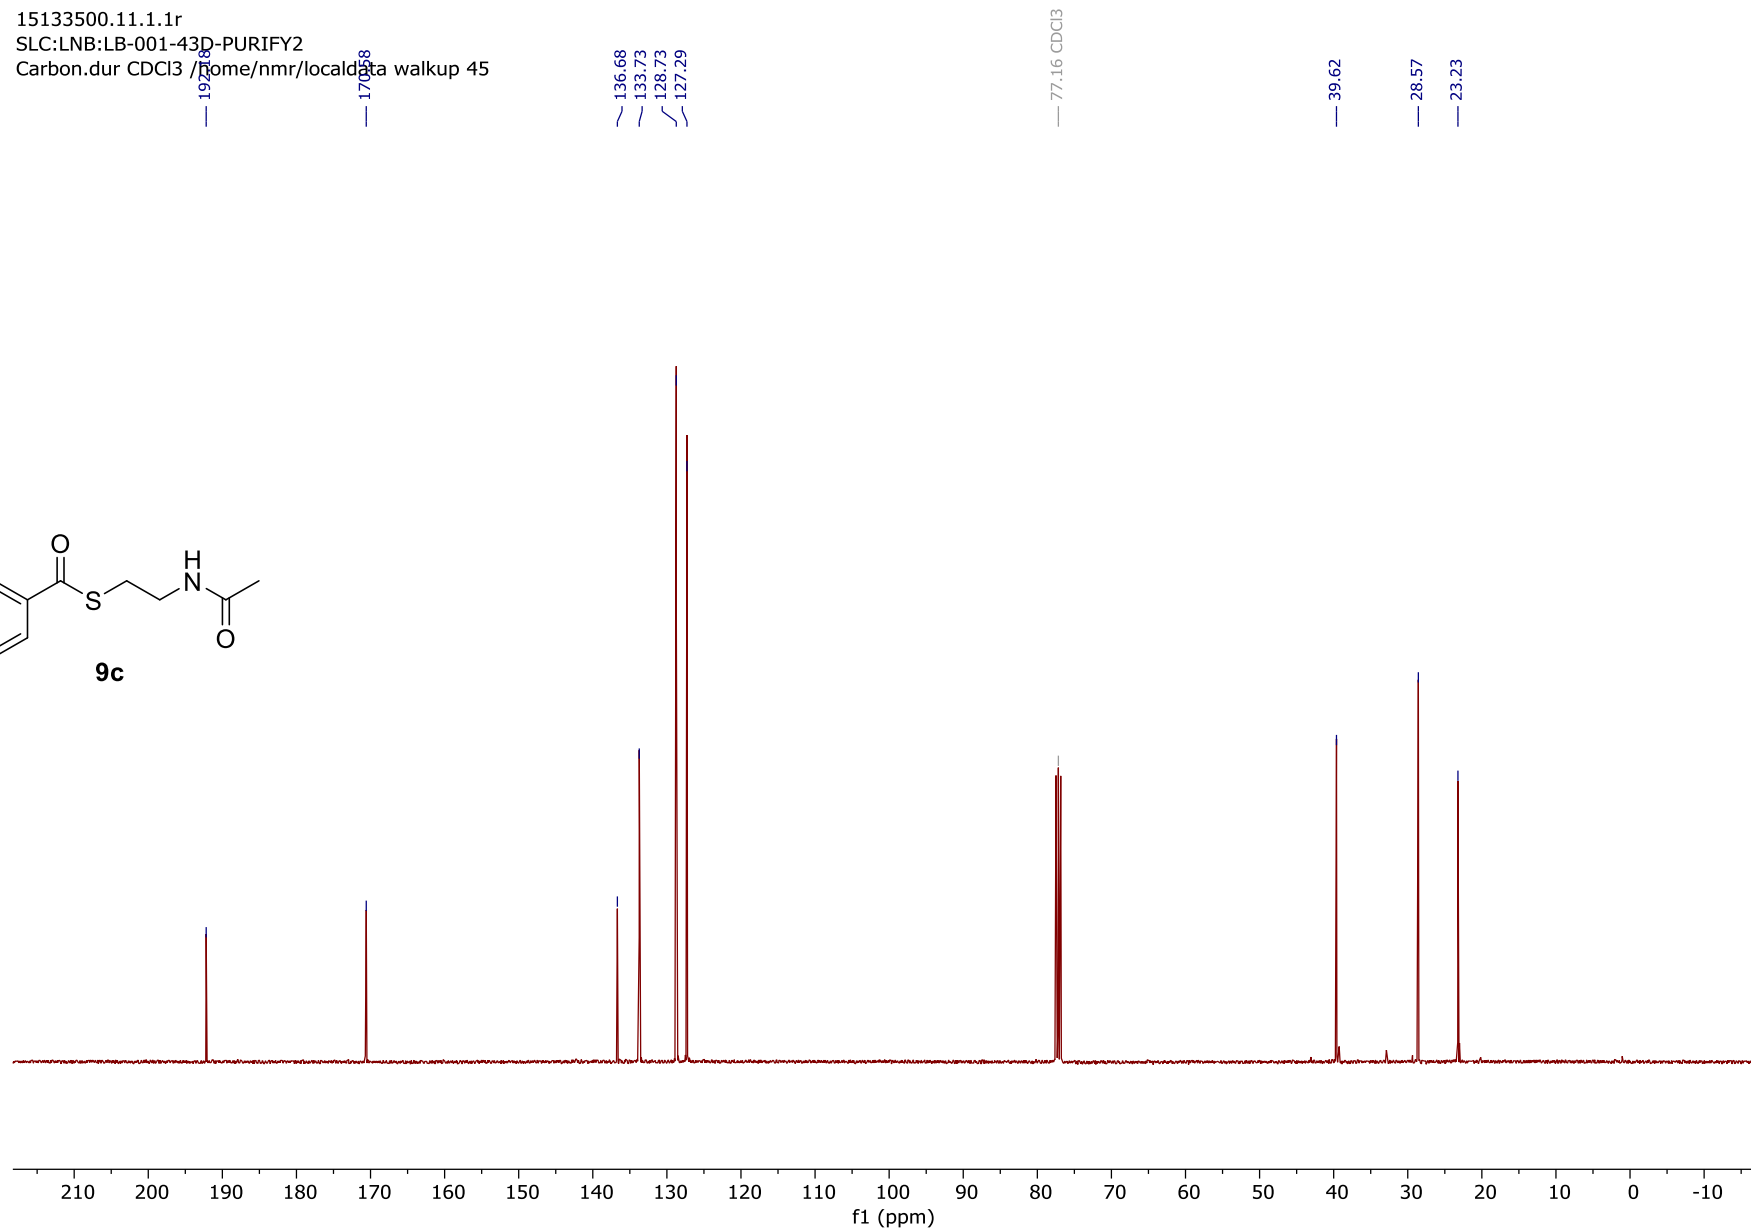

25173119.10.1.1r  
SLC:LNB:LB-001-81-PURIFY  
Proton.dur CDCl3 /hom

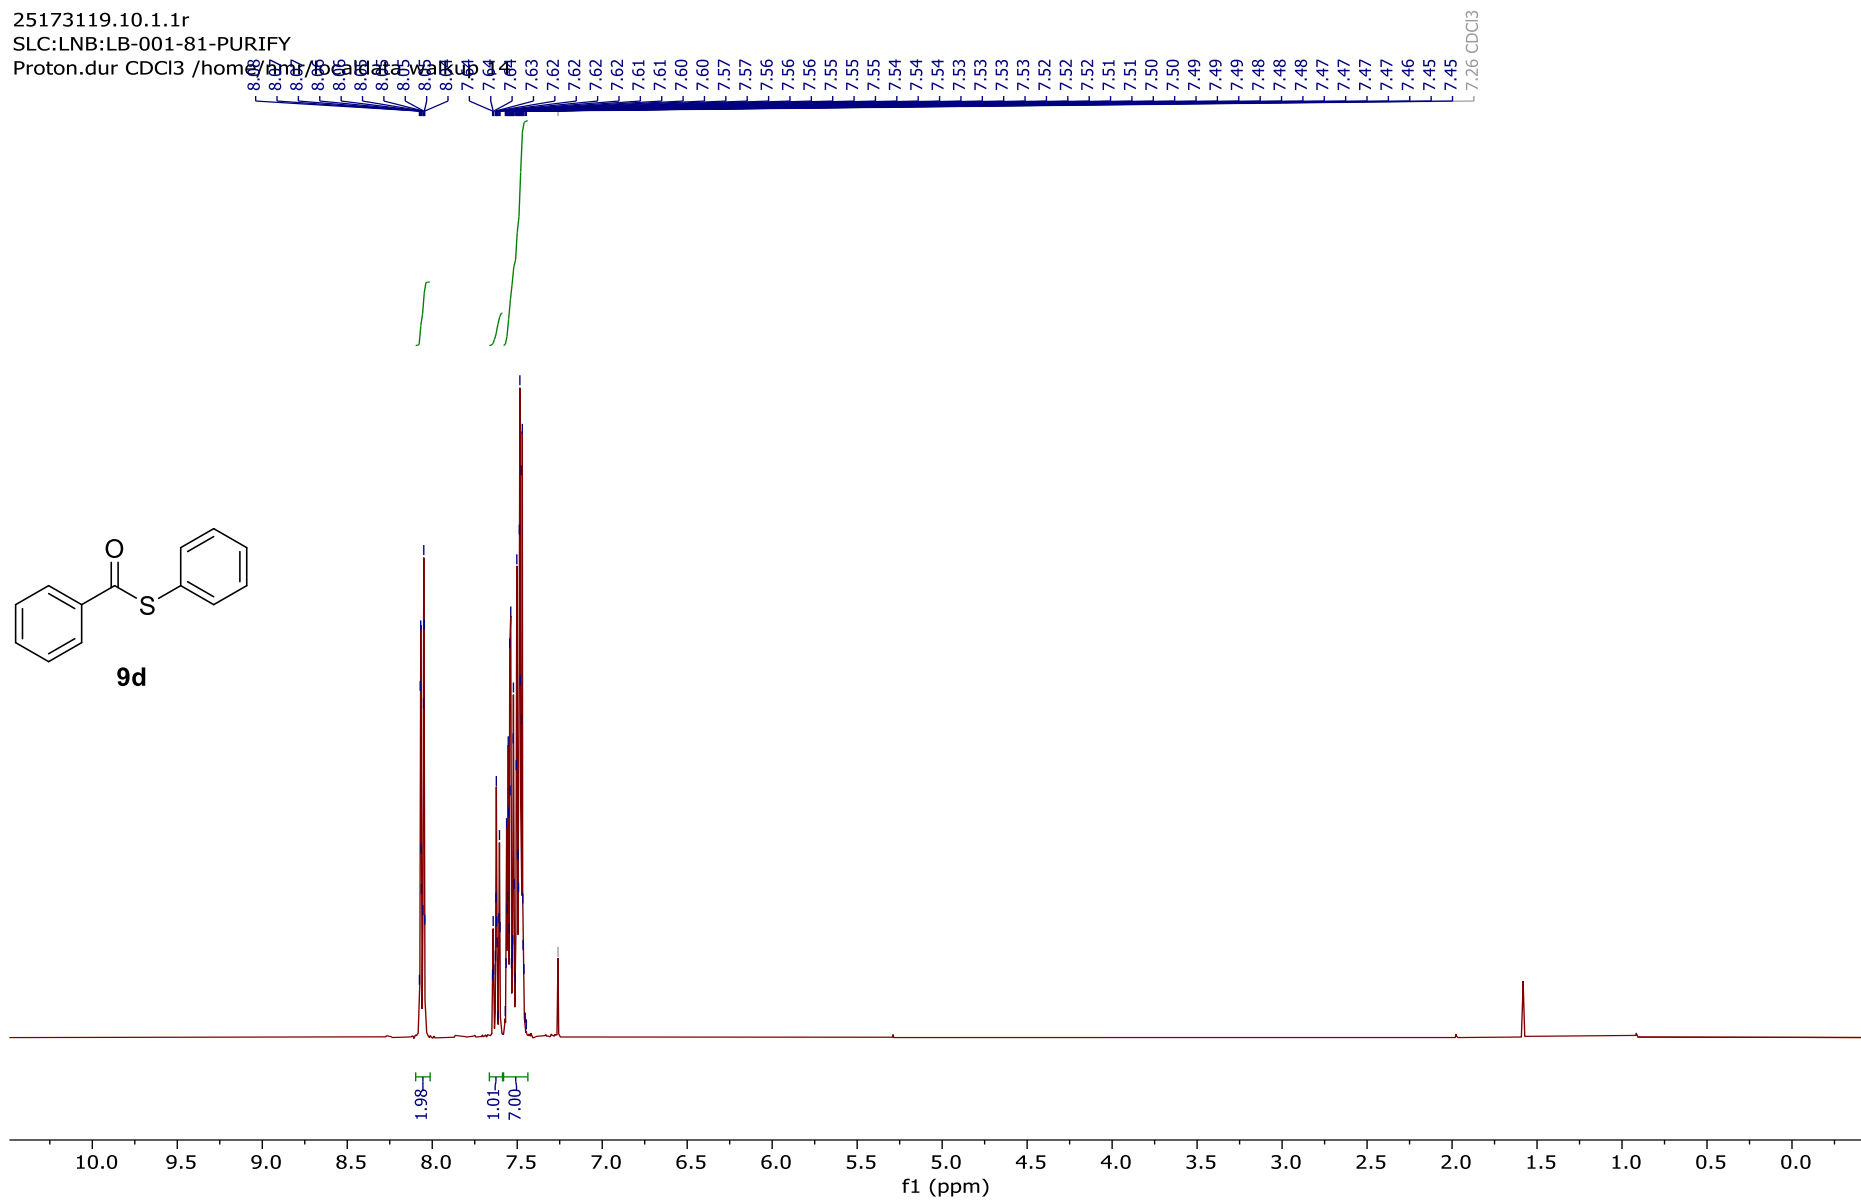



25173119.11.1.1r  
SLC:LNB:LB-001-81-PURIFY  
Carbon.dur CDCl3 /home/nmr/localdata walkup 14

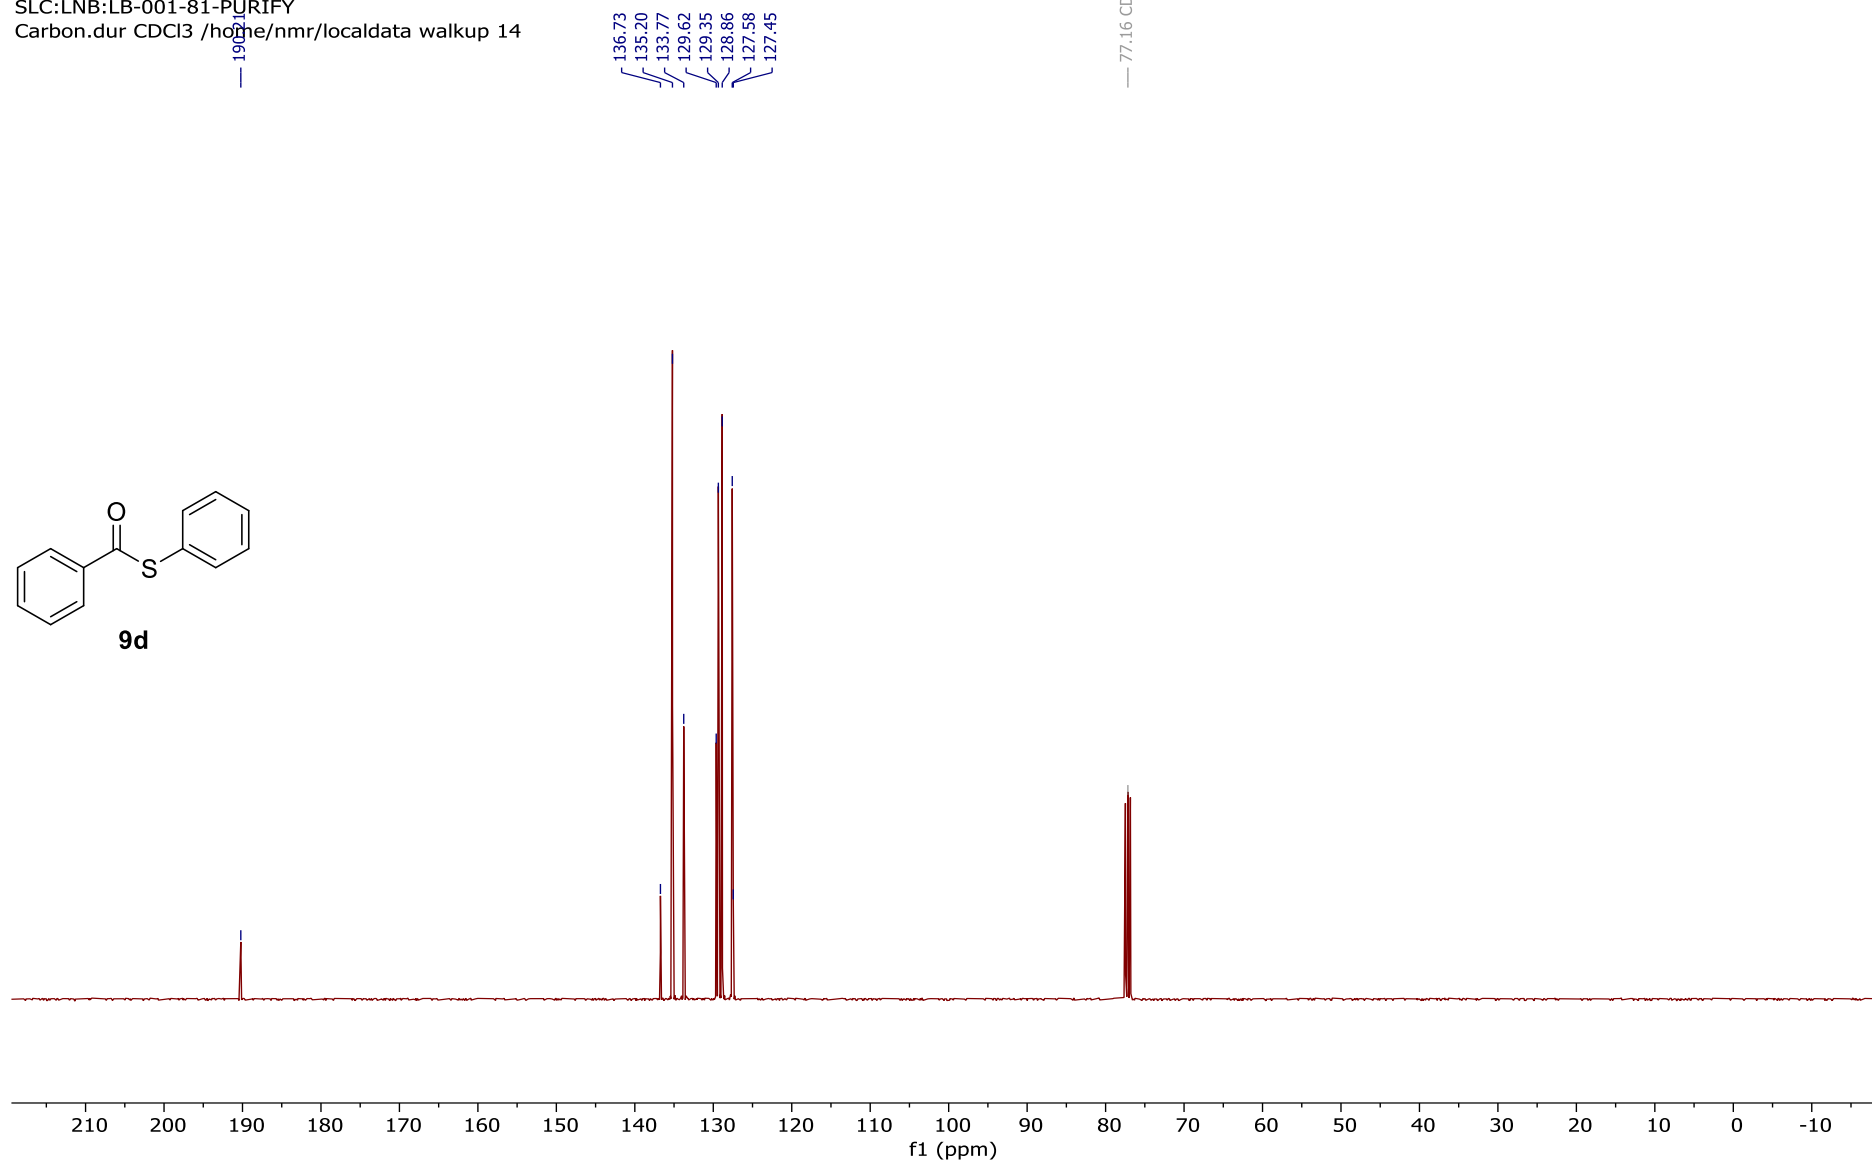

03180349.10.1.1r  
SLC:LNB:LB-002-52-PURIFY-TERTHIOL  
Proton1.icon CDCl3 /home/nmr/localdata walkup 45

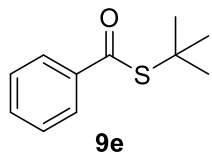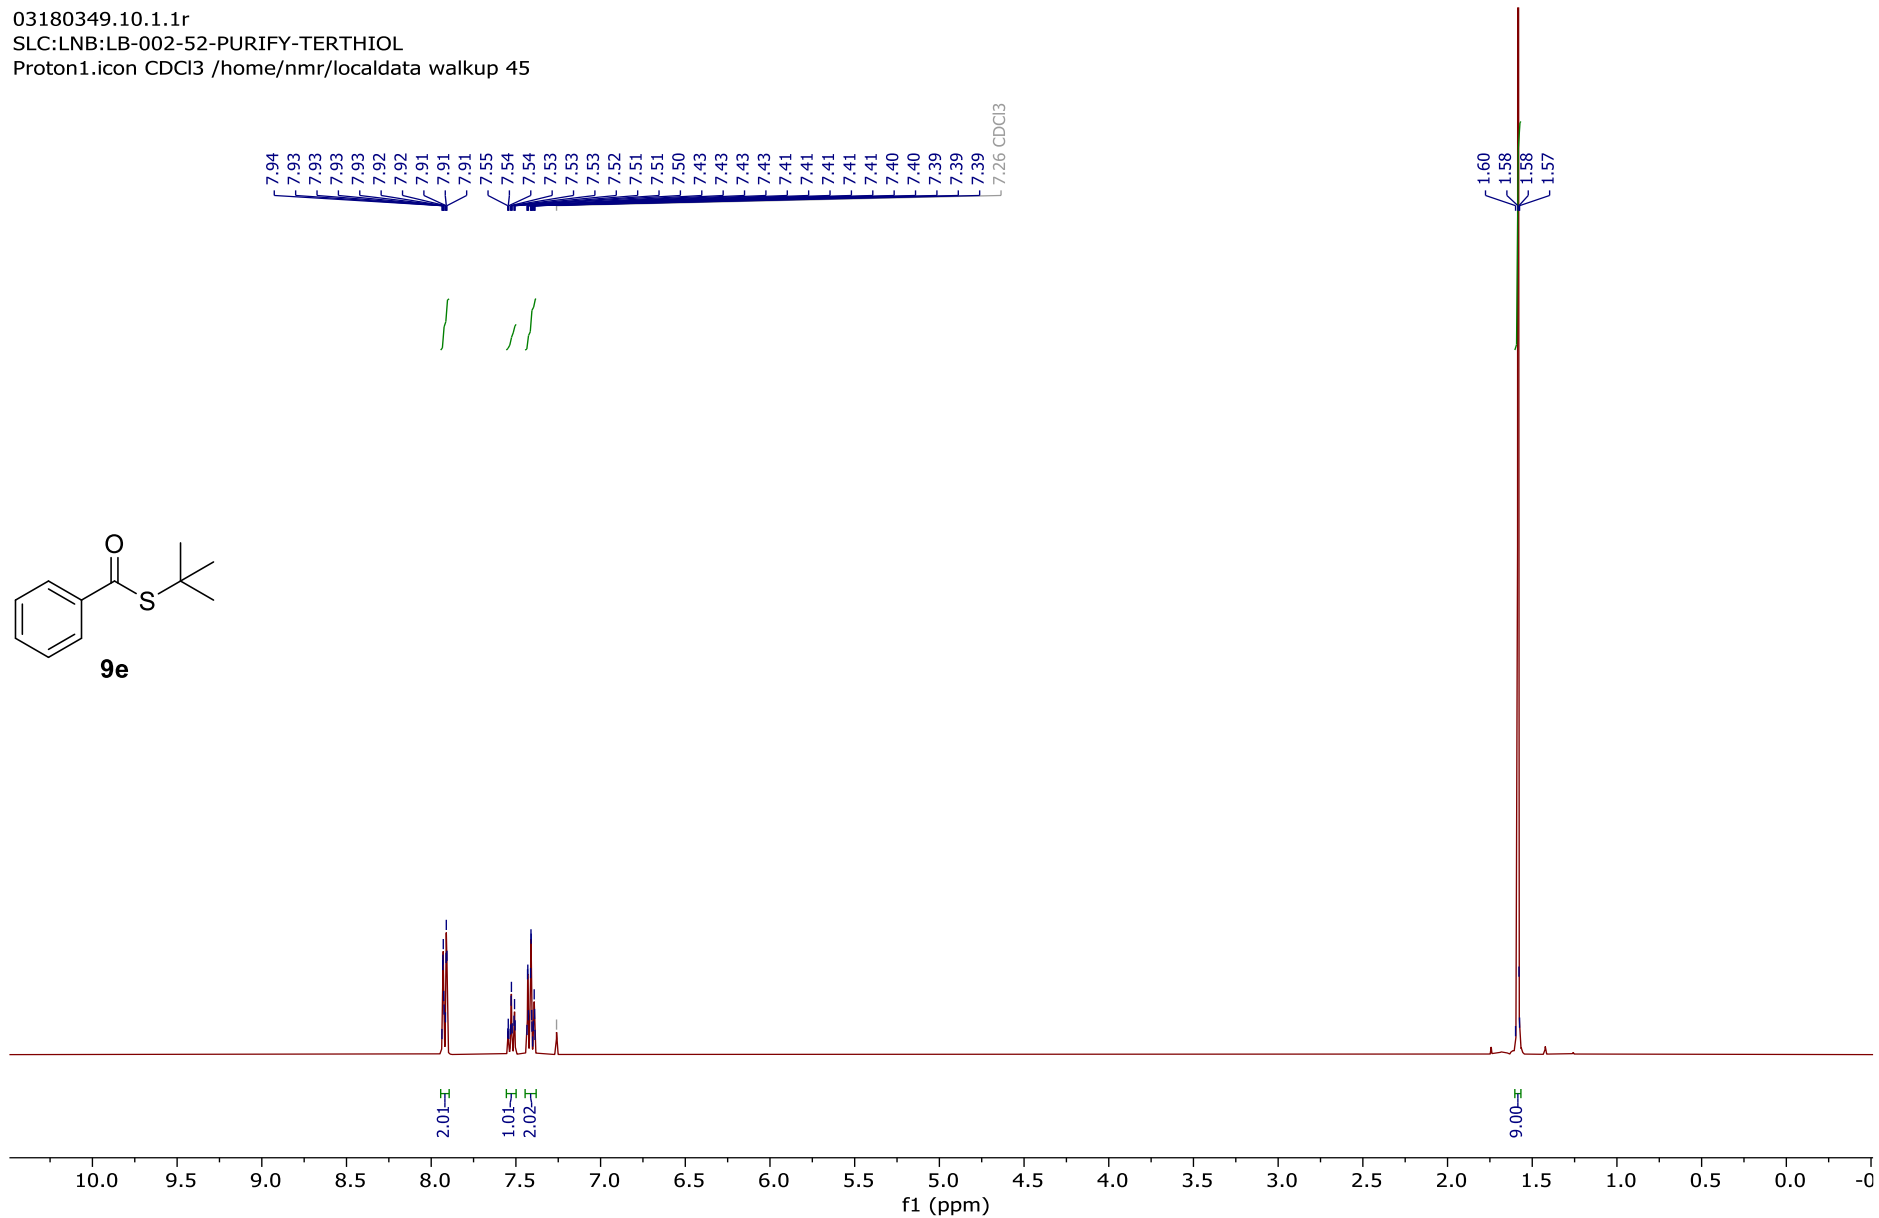

03180349.11.1.1r  
SLC:LNB:LB-002-52-PURIFY-TERTHIOL  
Carbon.dur CDCl3 /home/nmr/localdata walkup 45

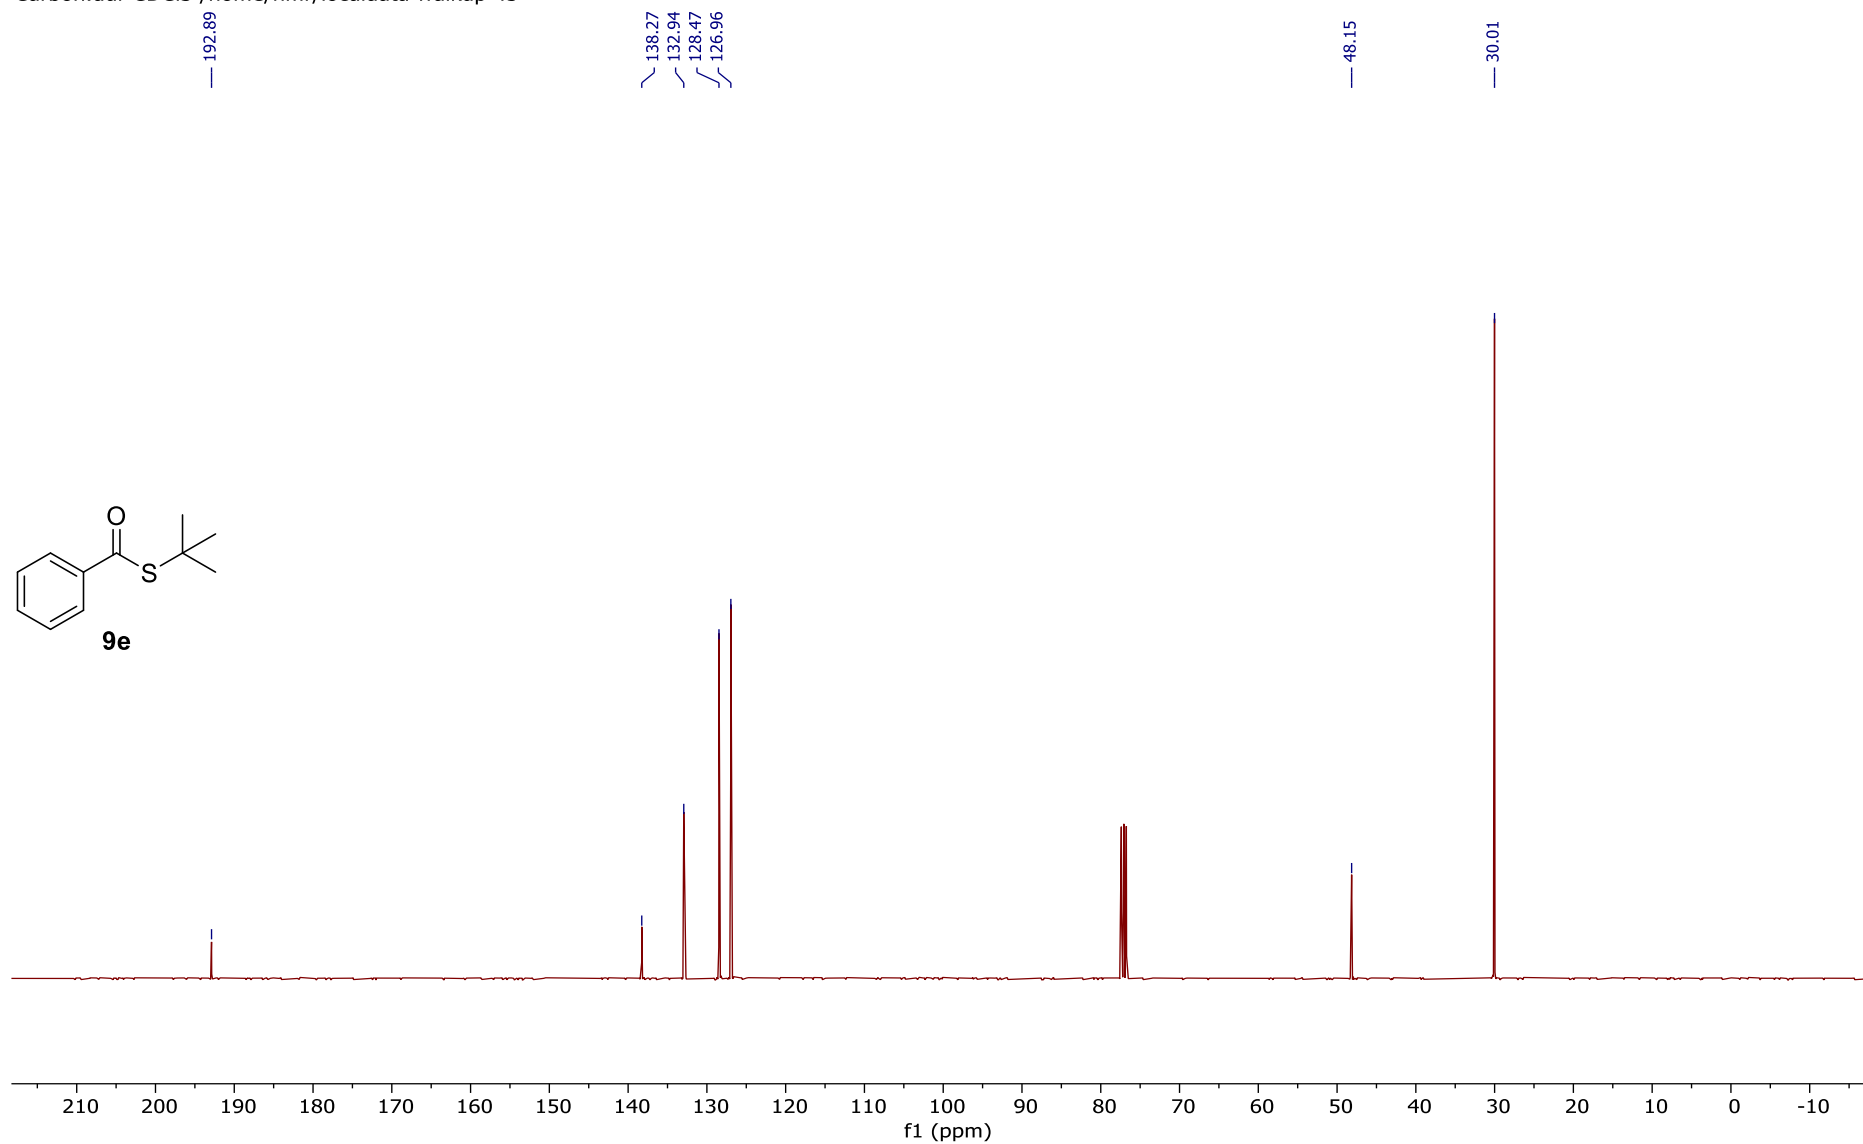

S-99

04152120.10.1.1r  
SLC:LNB:LB-002-60-F42-47-PURIFY  
Proton1.icon CDCl3

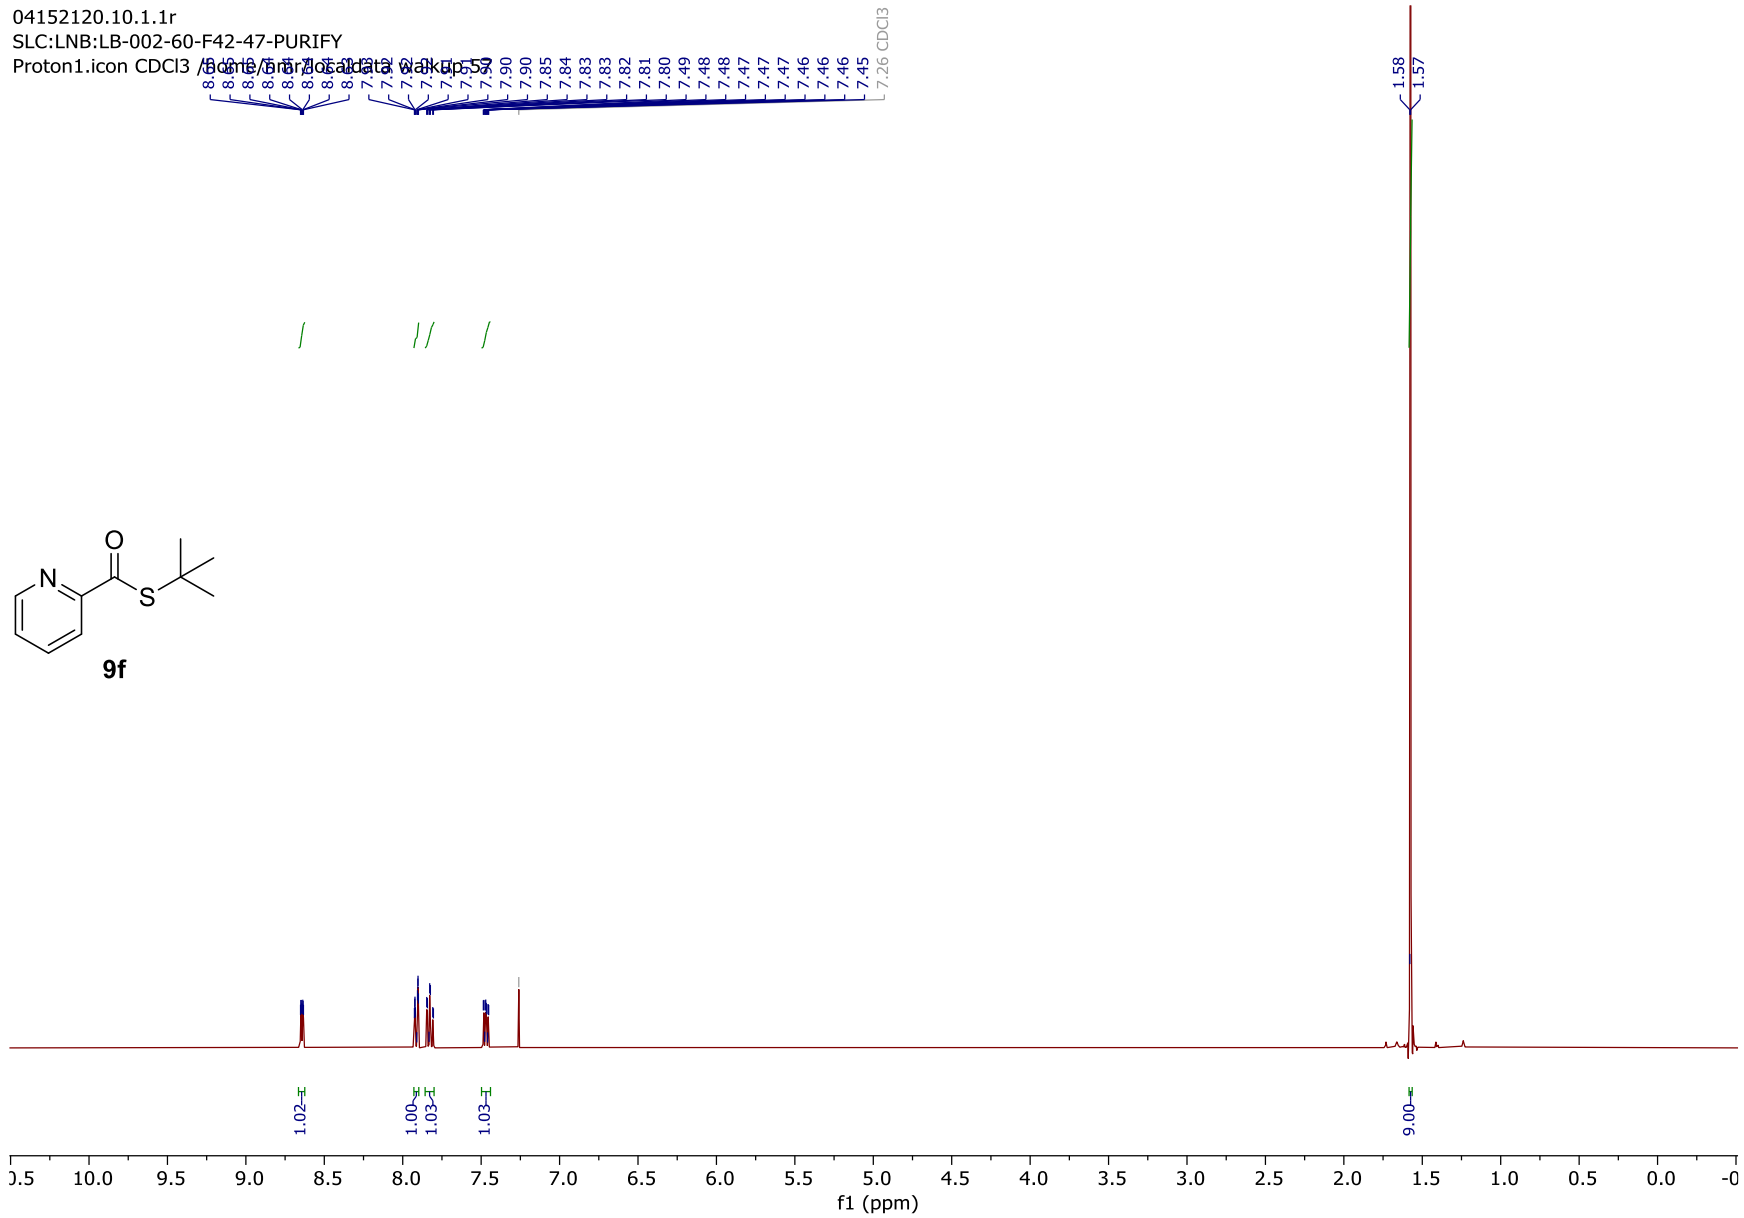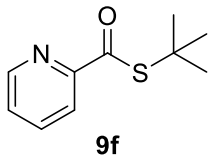

CARBON\_01  
SLC:LNB:LB-002-60

— 193.79

— 153.27

— 148.98

— 137.35

— 127.61

— 120.11

— 77.16 CDCl<sub>3</sub>

— 47.09  
— 47.09

— 29.89

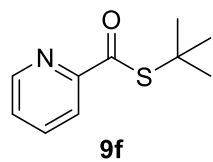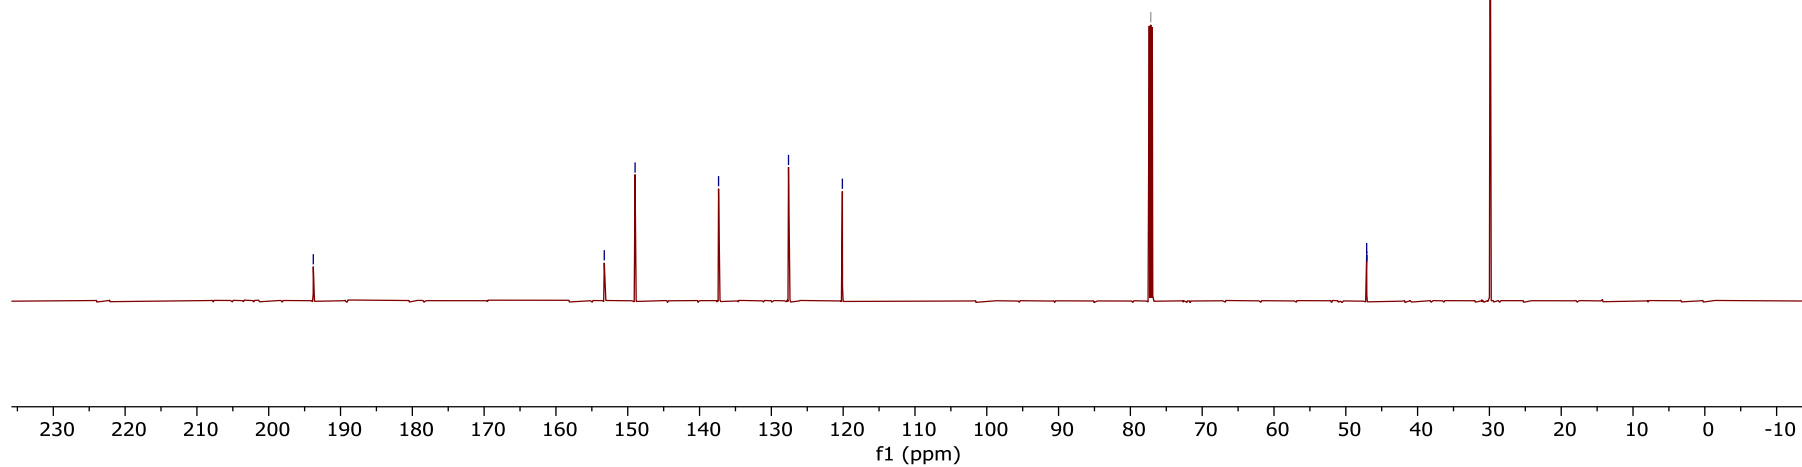

S-101

08174351.10.1.1r  
SLC:LNB:LB-001-42-PURIFY  
Proton.dur CDCl3 /home/nmr/

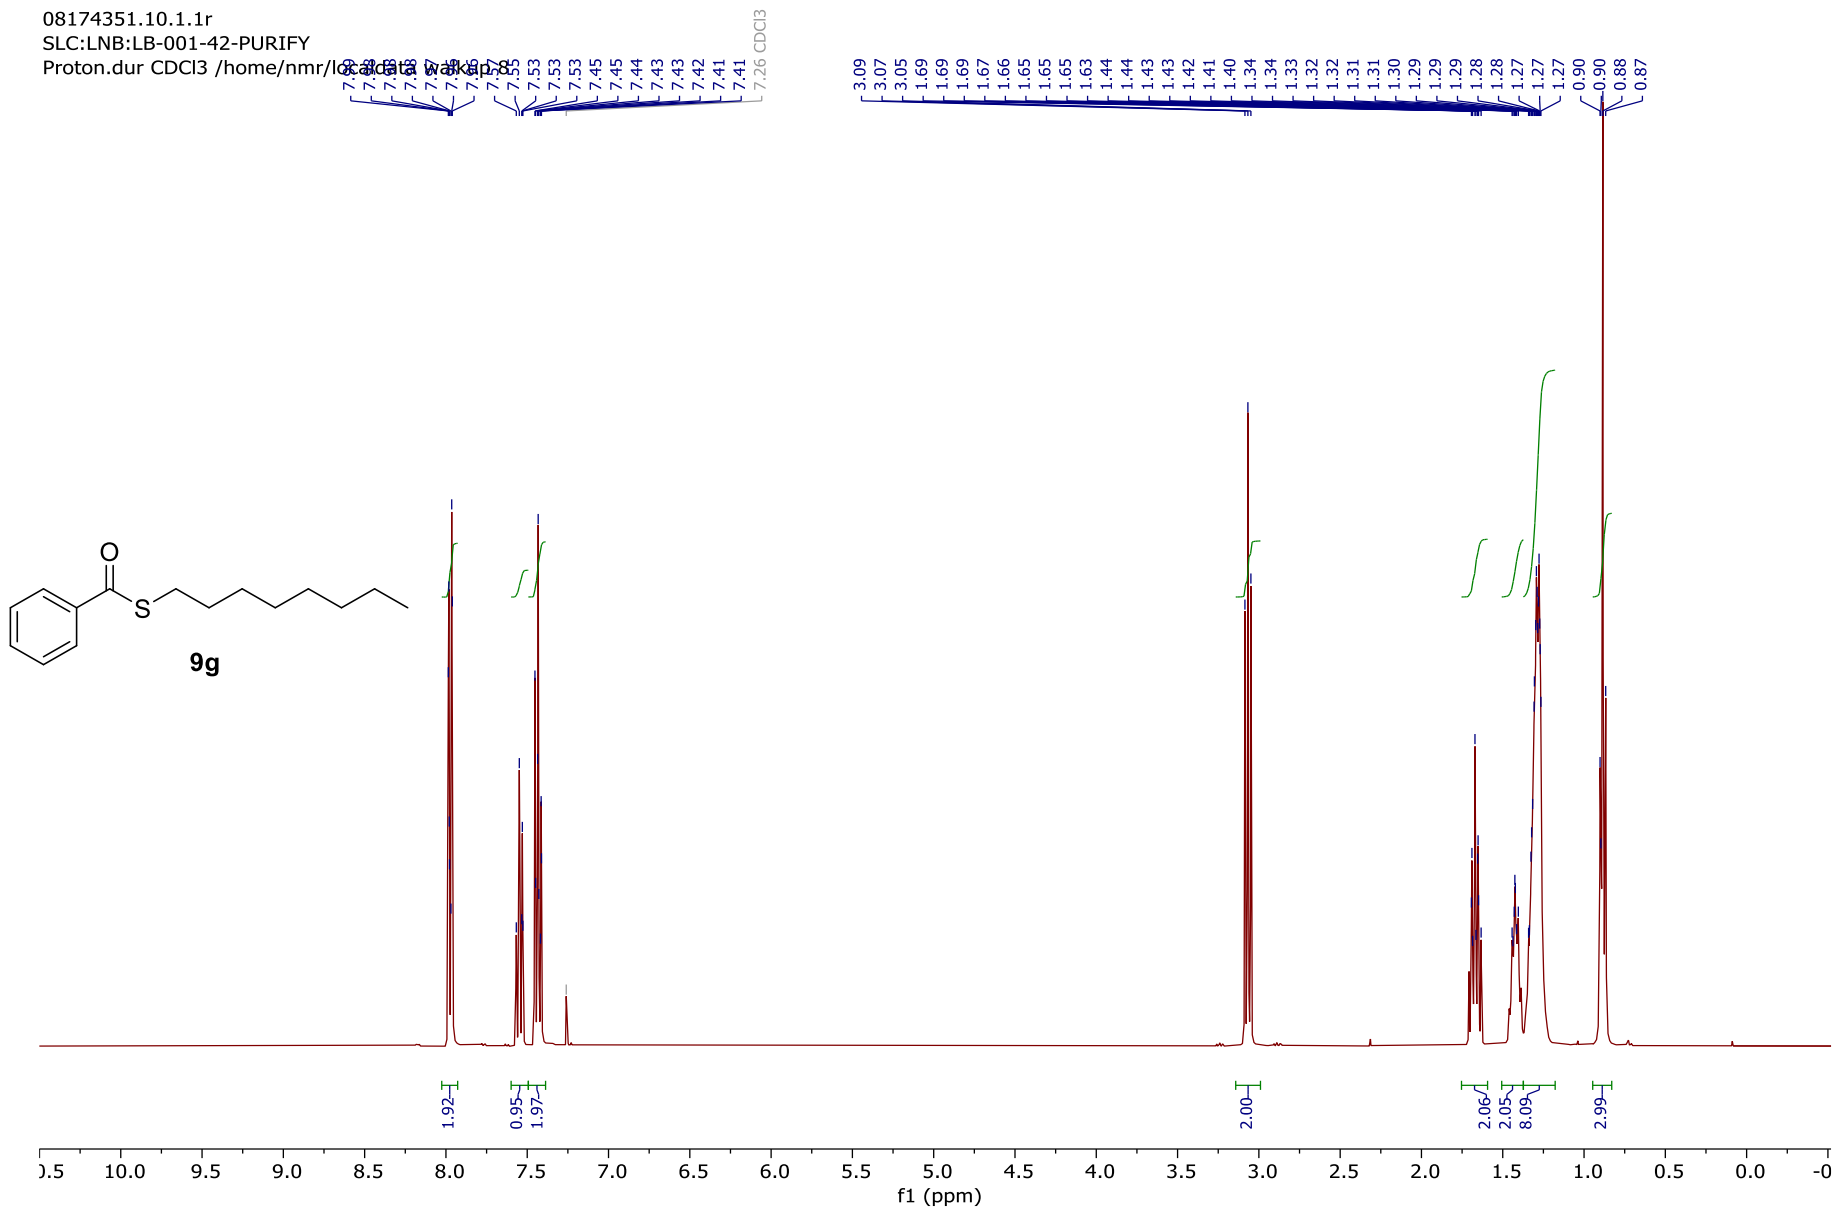

08174351.15.1.1r  
SLC:LNB:LB-001-42-PURIFY  
Carbon.dur CDCl3 / Home/nmr/localdata walkup 8

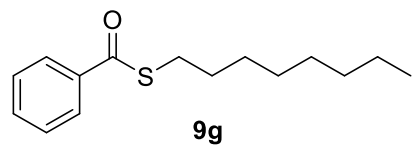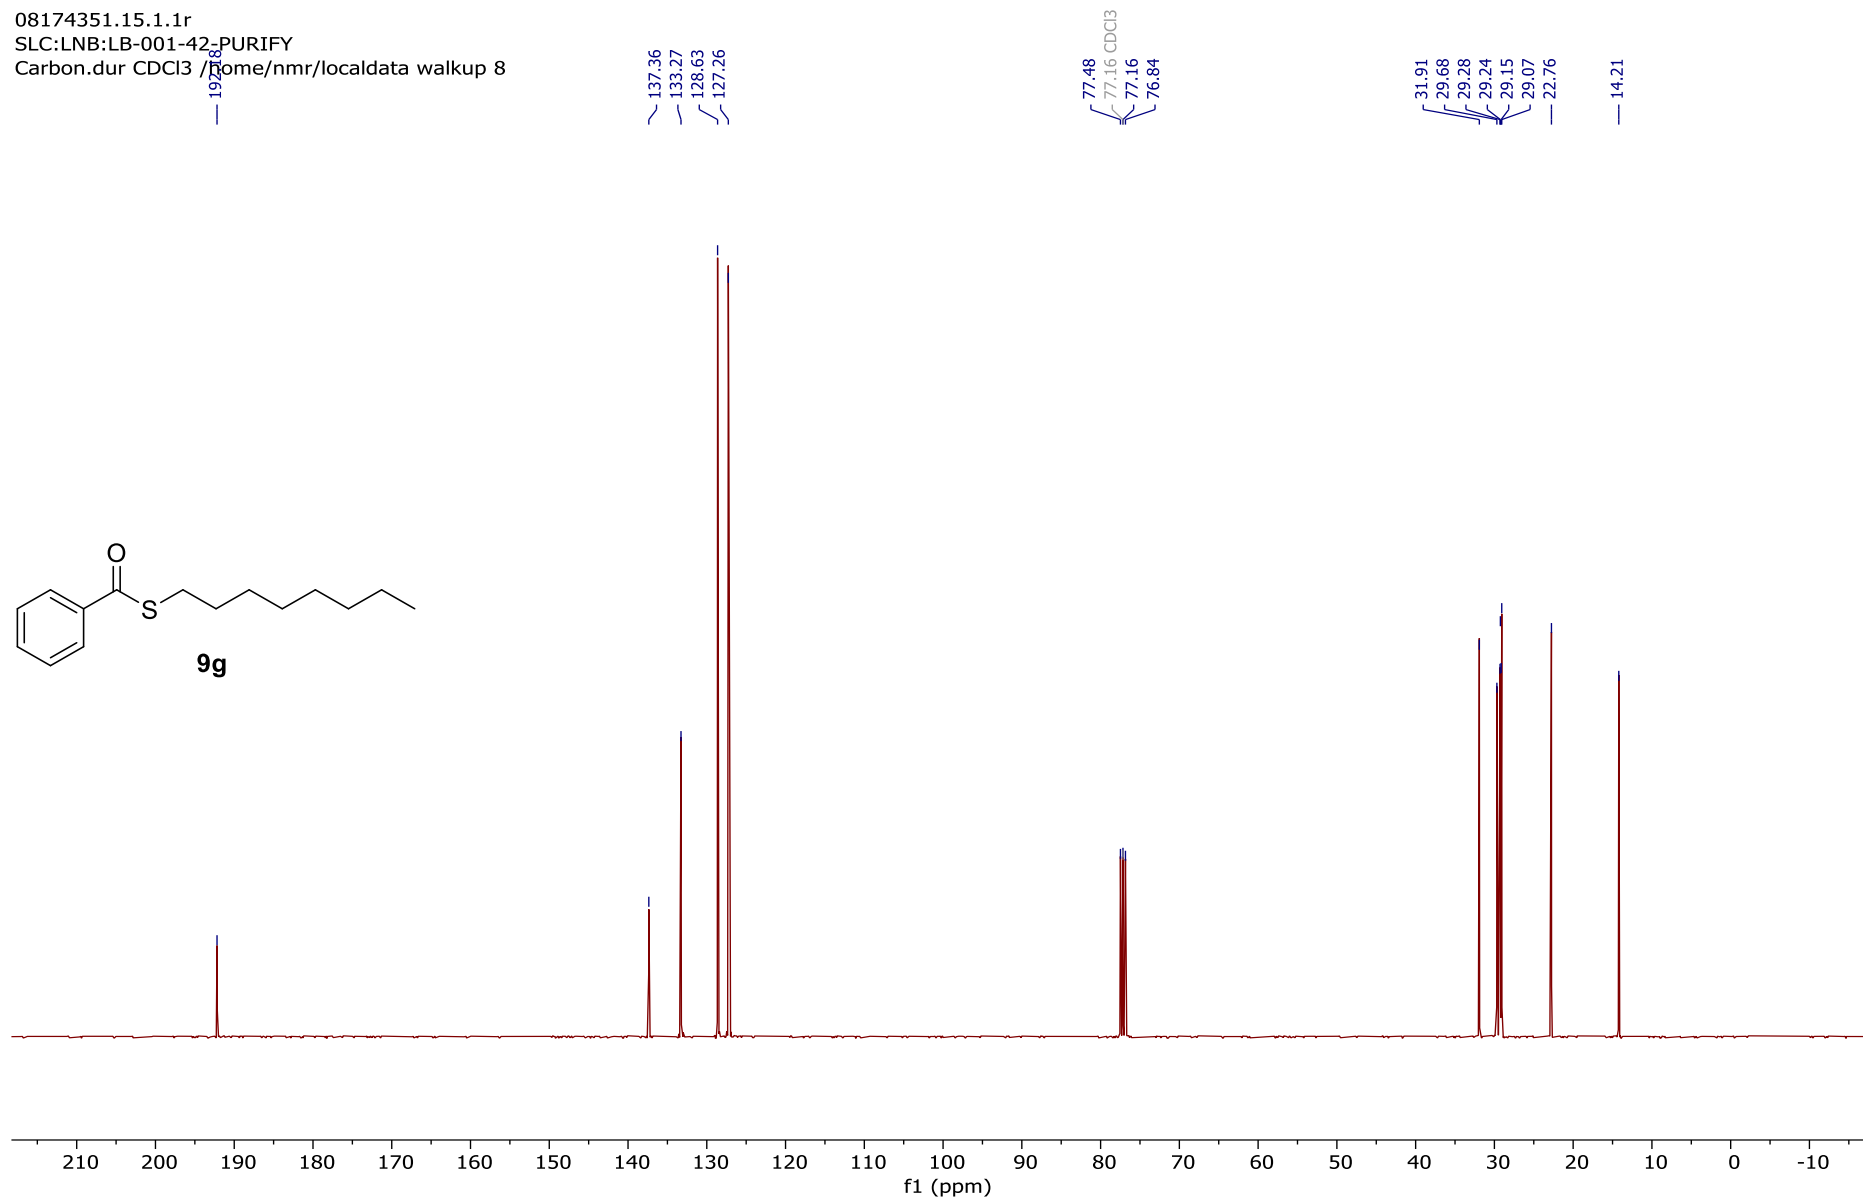

16174251.10.1.1r  
SLC:LNB:LB-001-69-BROAD FRAC  
Proton1.icon CDCl3 /home/nmr/localdata/walkup 25

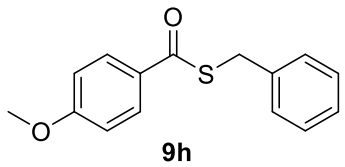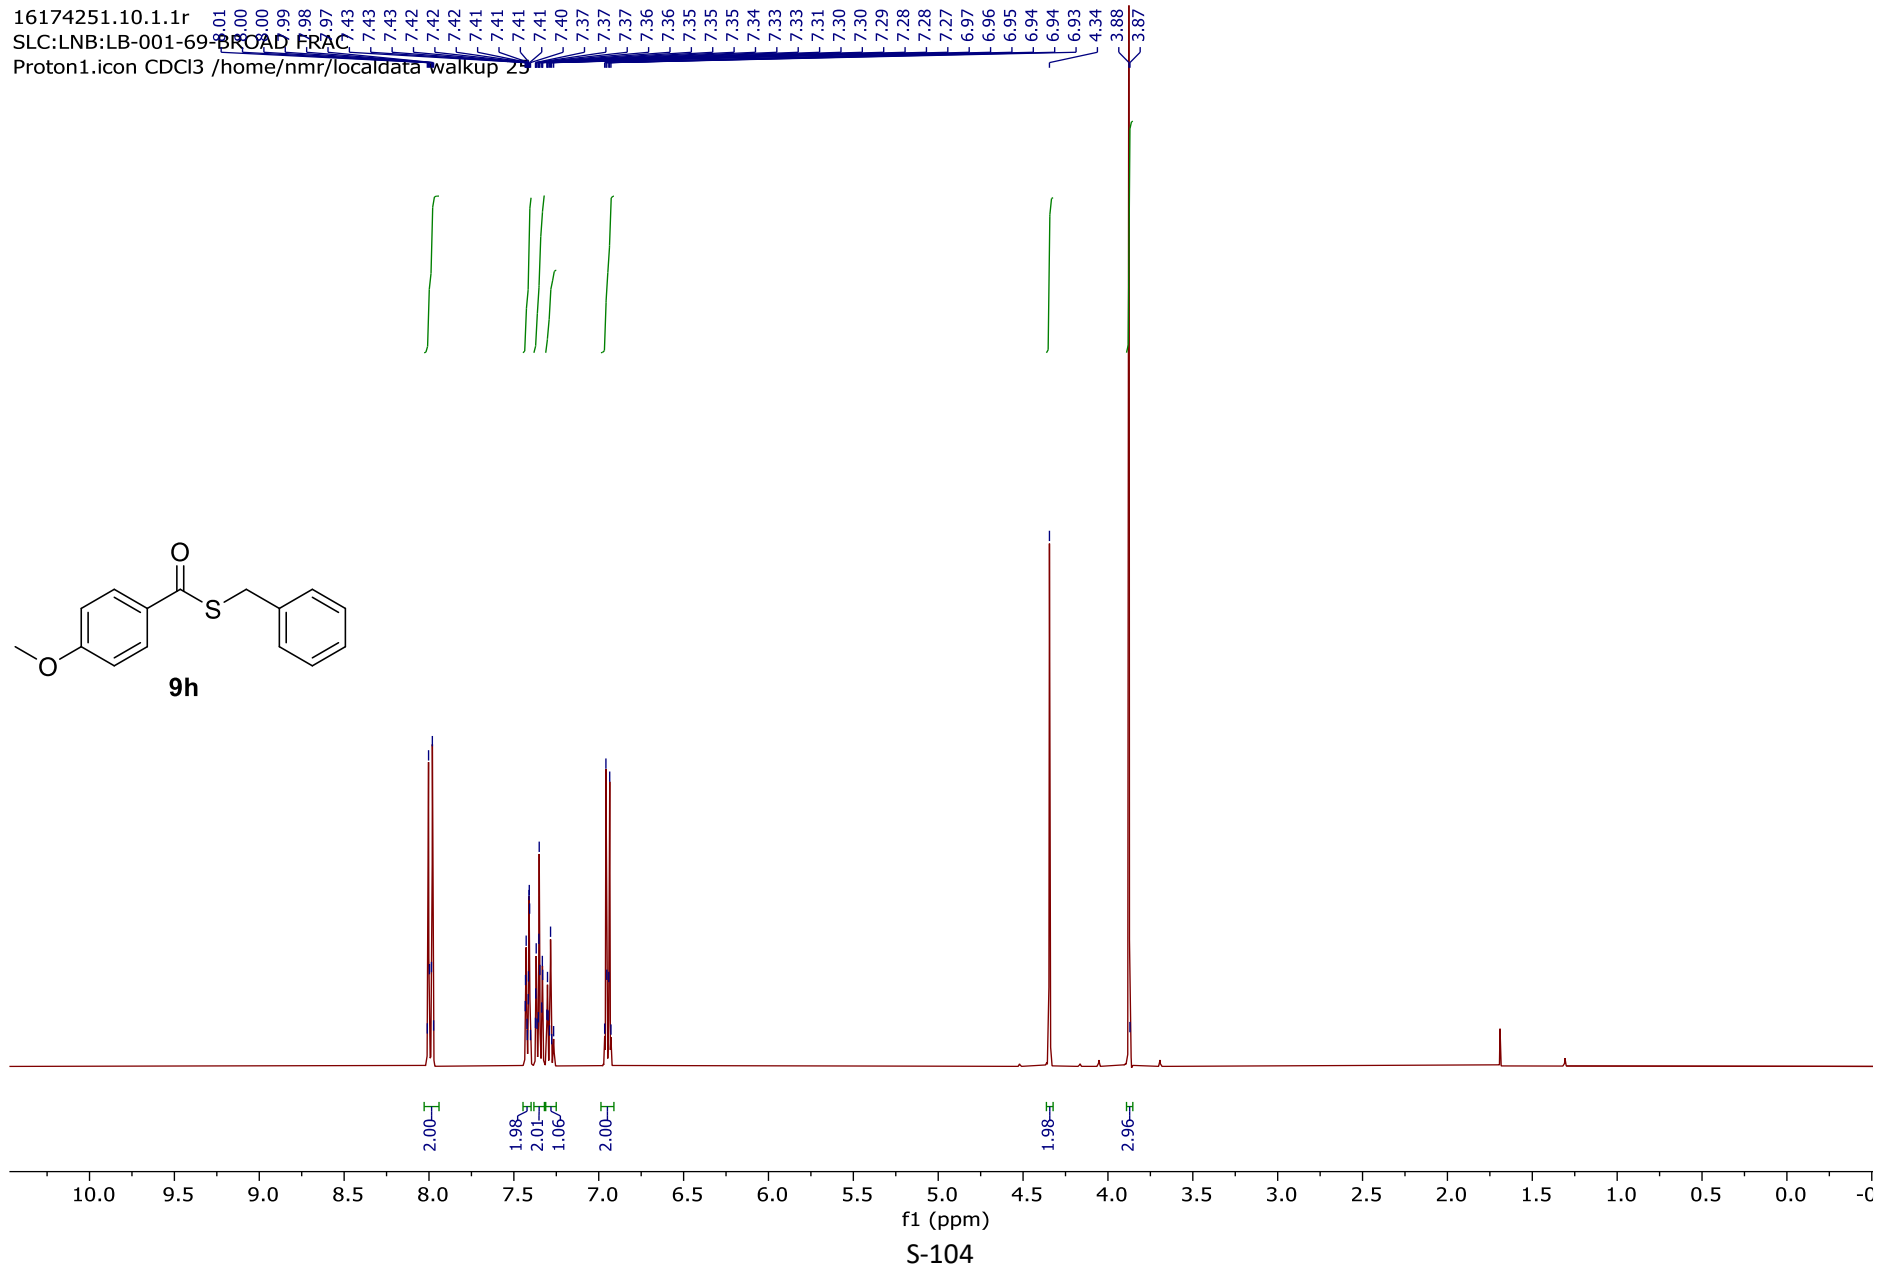



16174251.11.1.1r  
SLC:LNB:LB-001-69-BROAD FRAC  
Carbon.dur CDCl3 /home/nmr/localdata/walkup 25

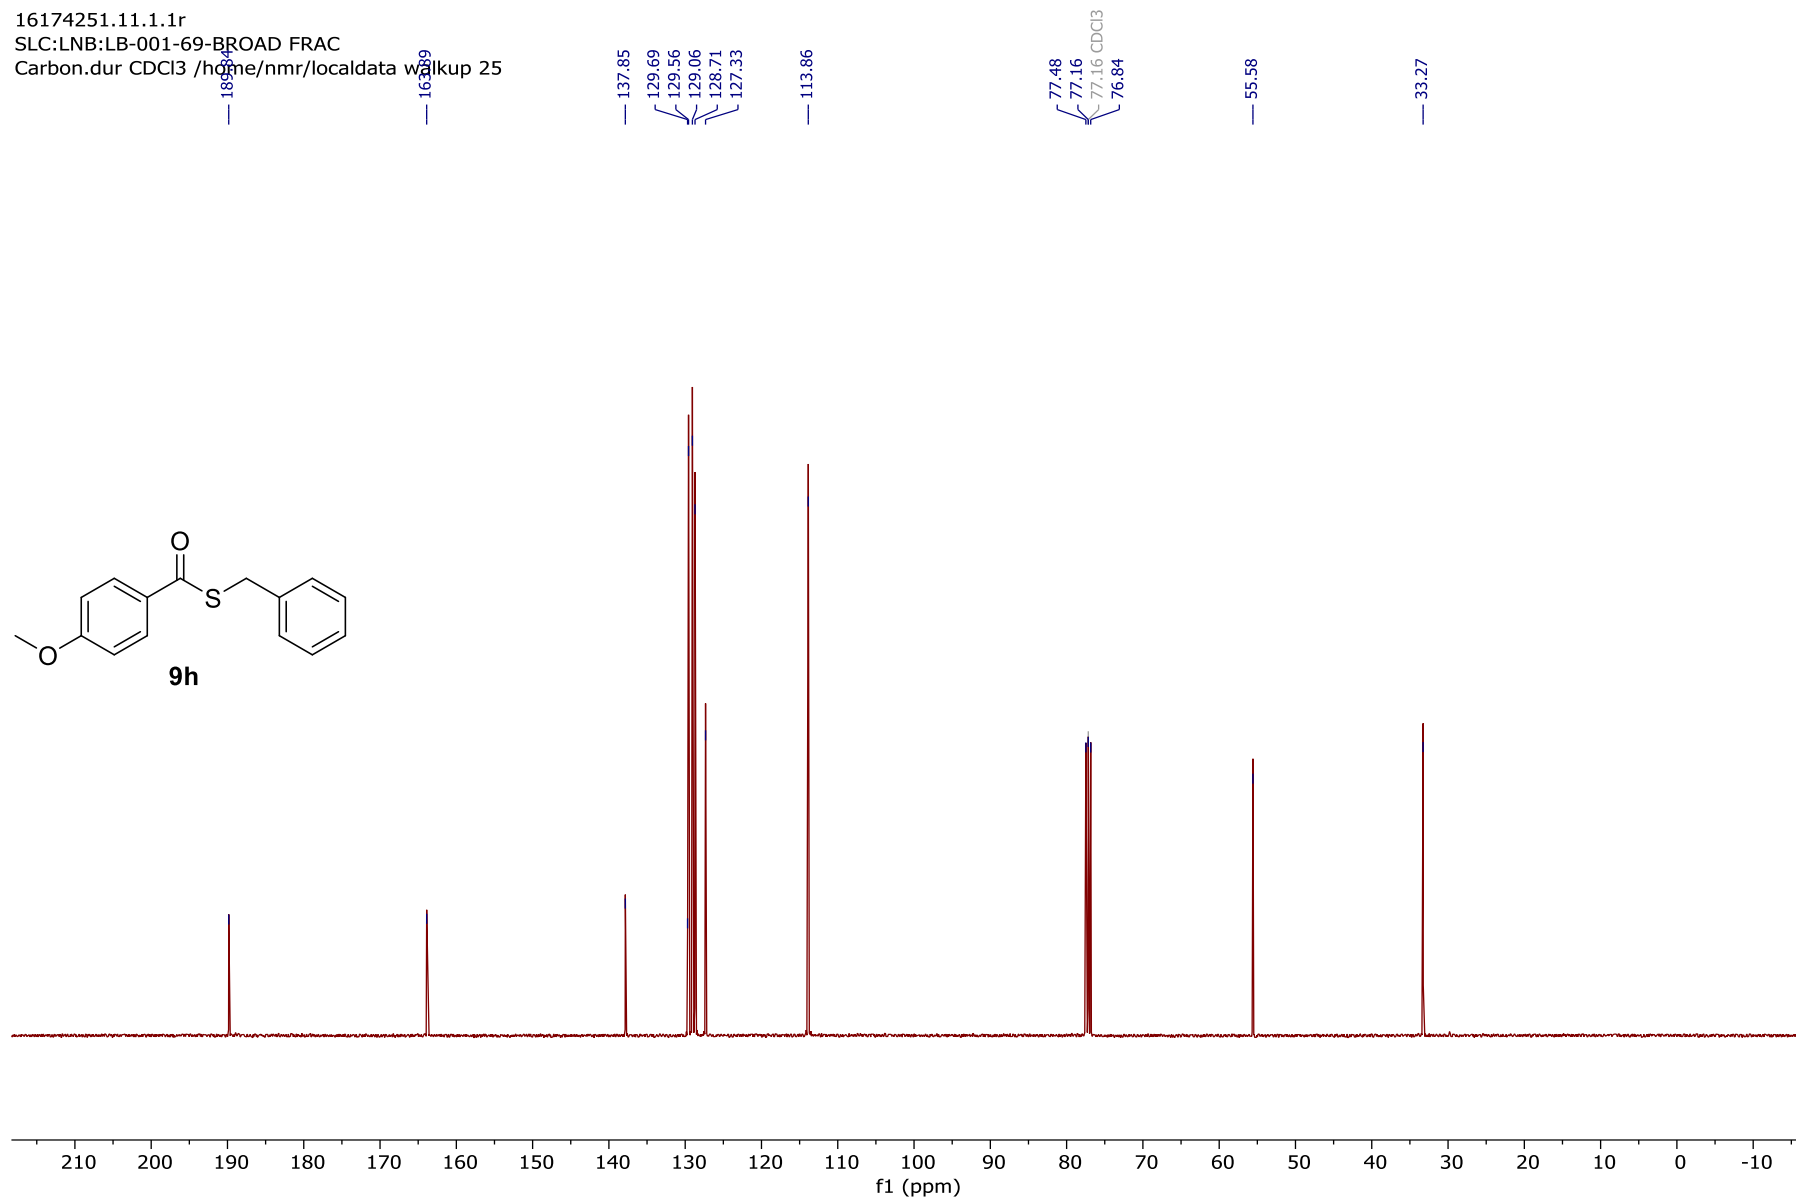

PROTON 10  
SLC: LNB: LB: 72

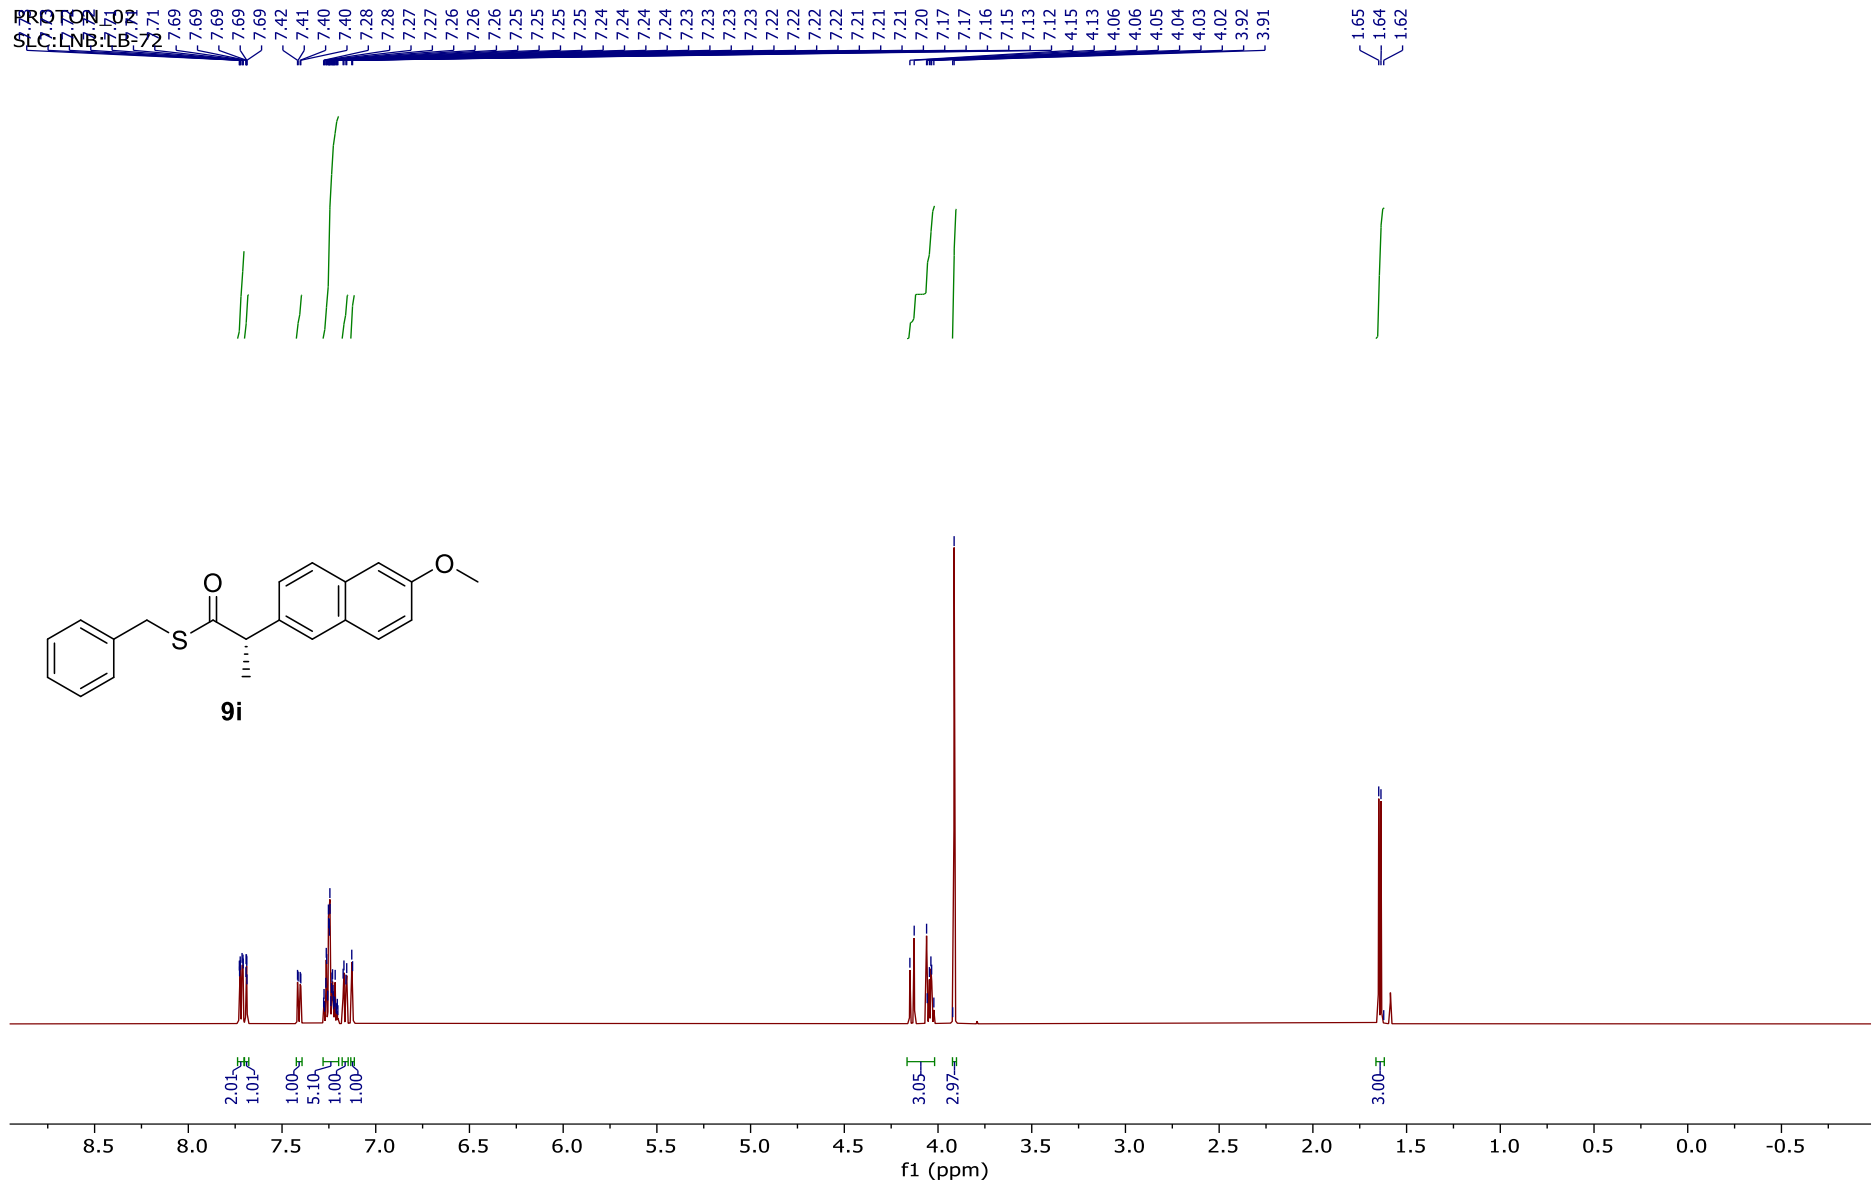

CARBON\_01  
SLC\_LNB:LB-72

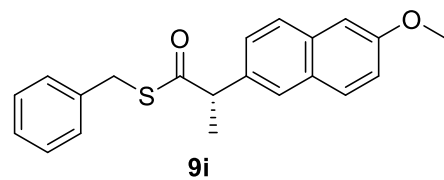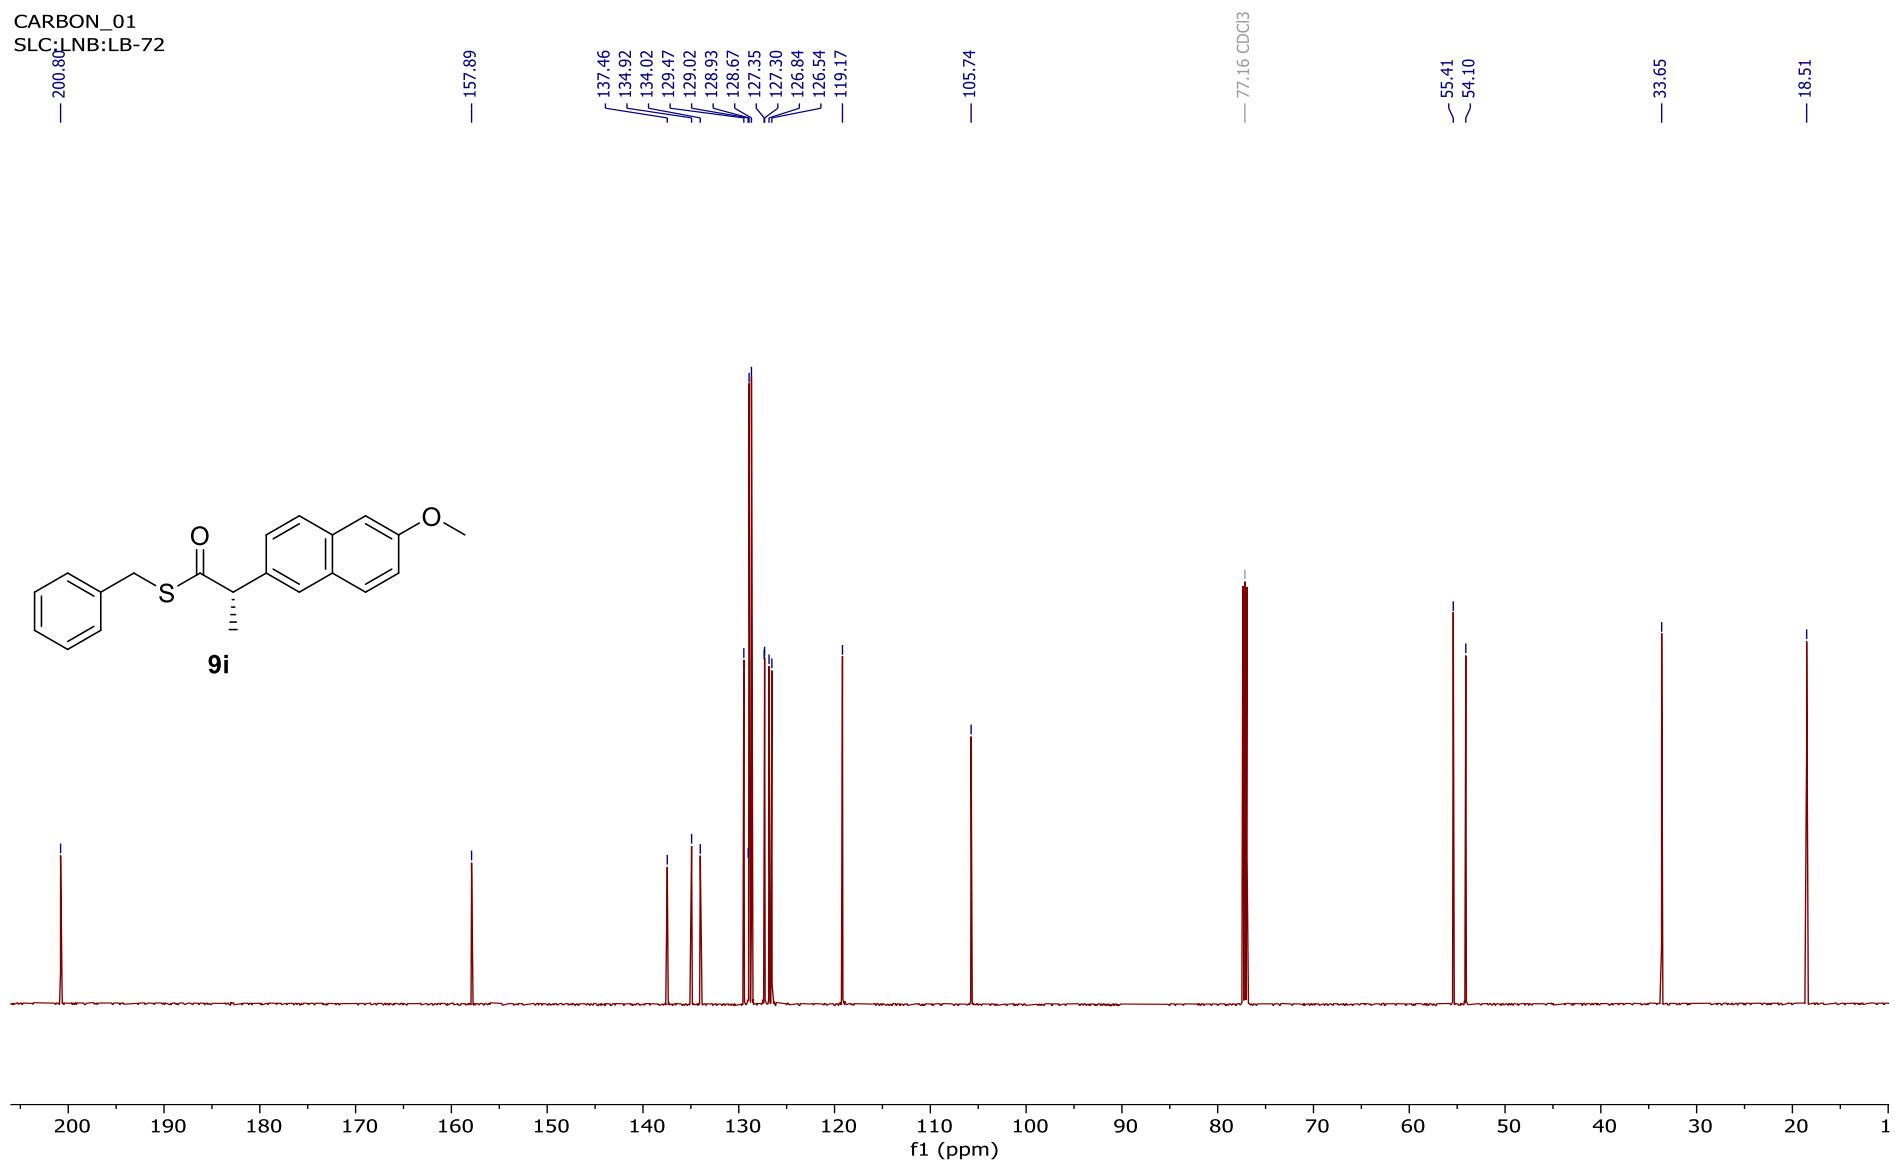

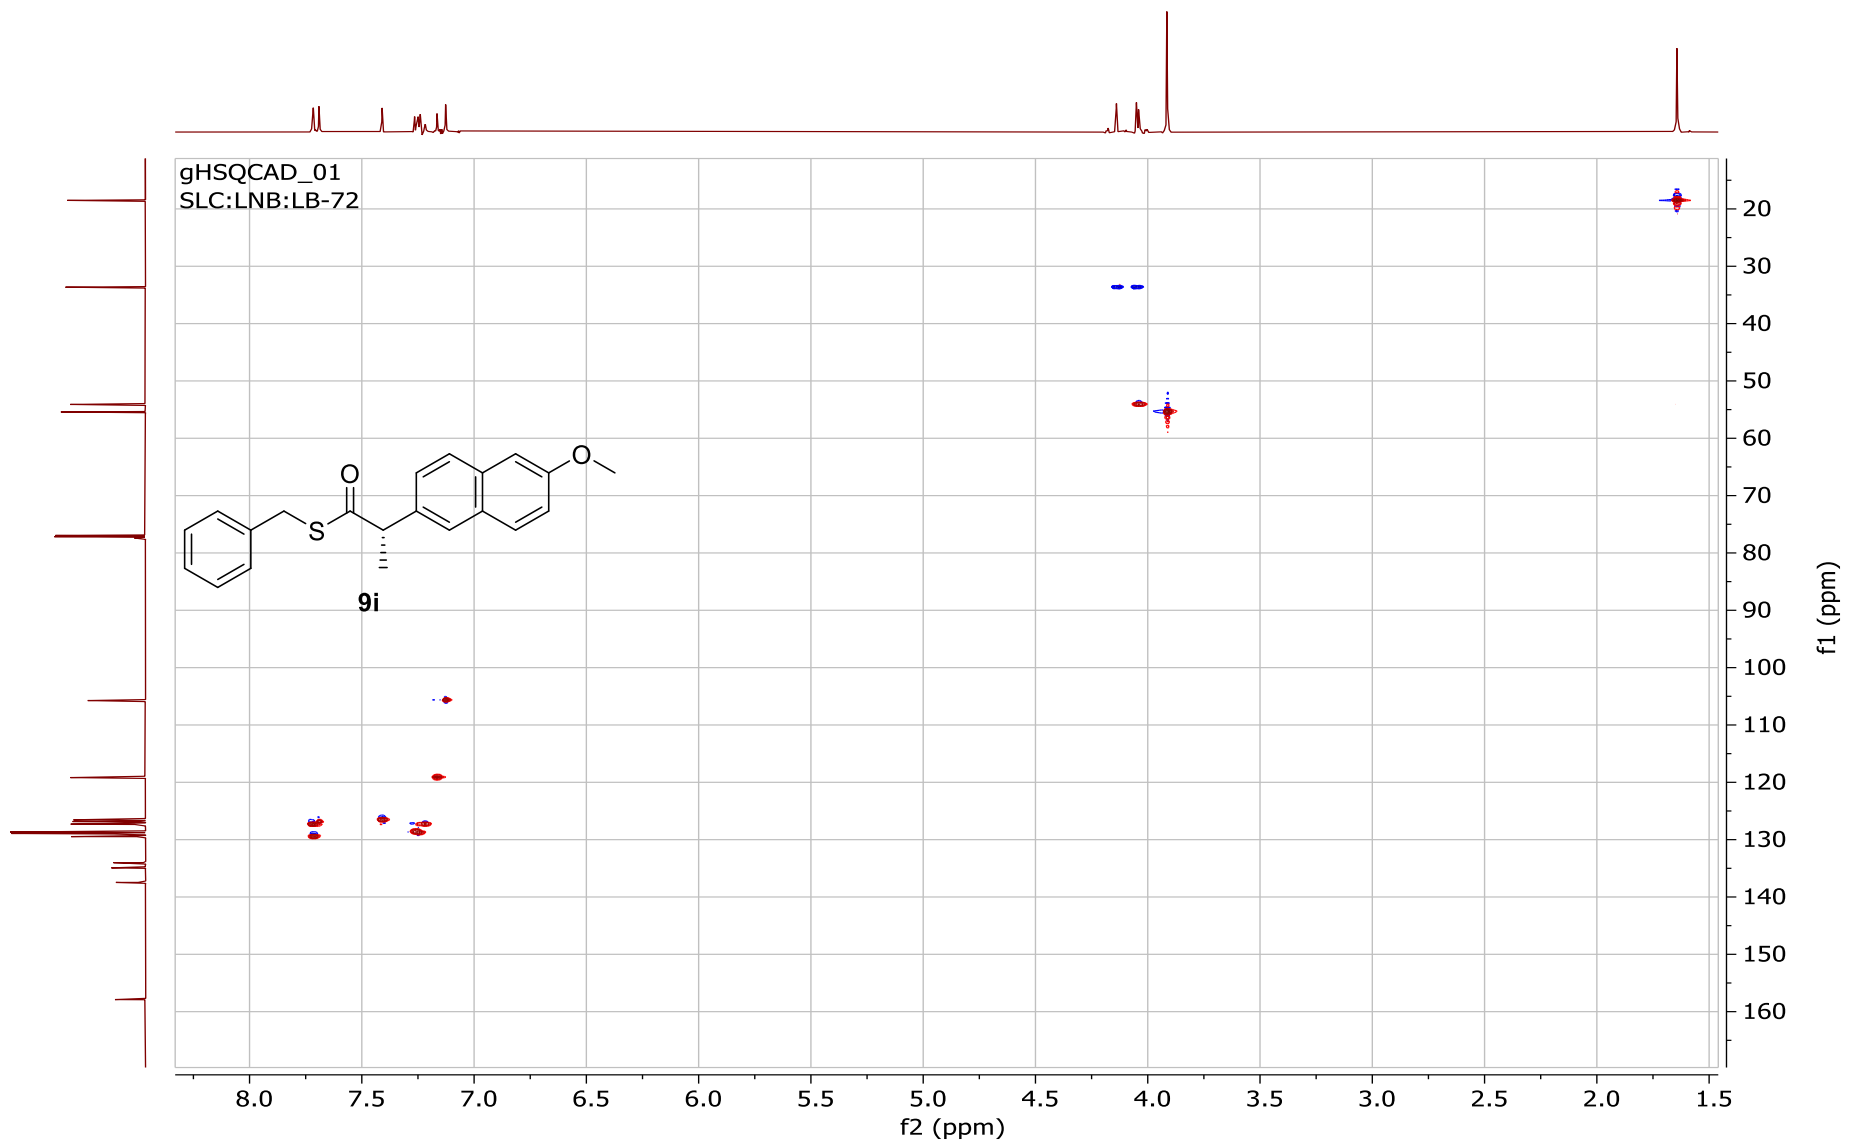

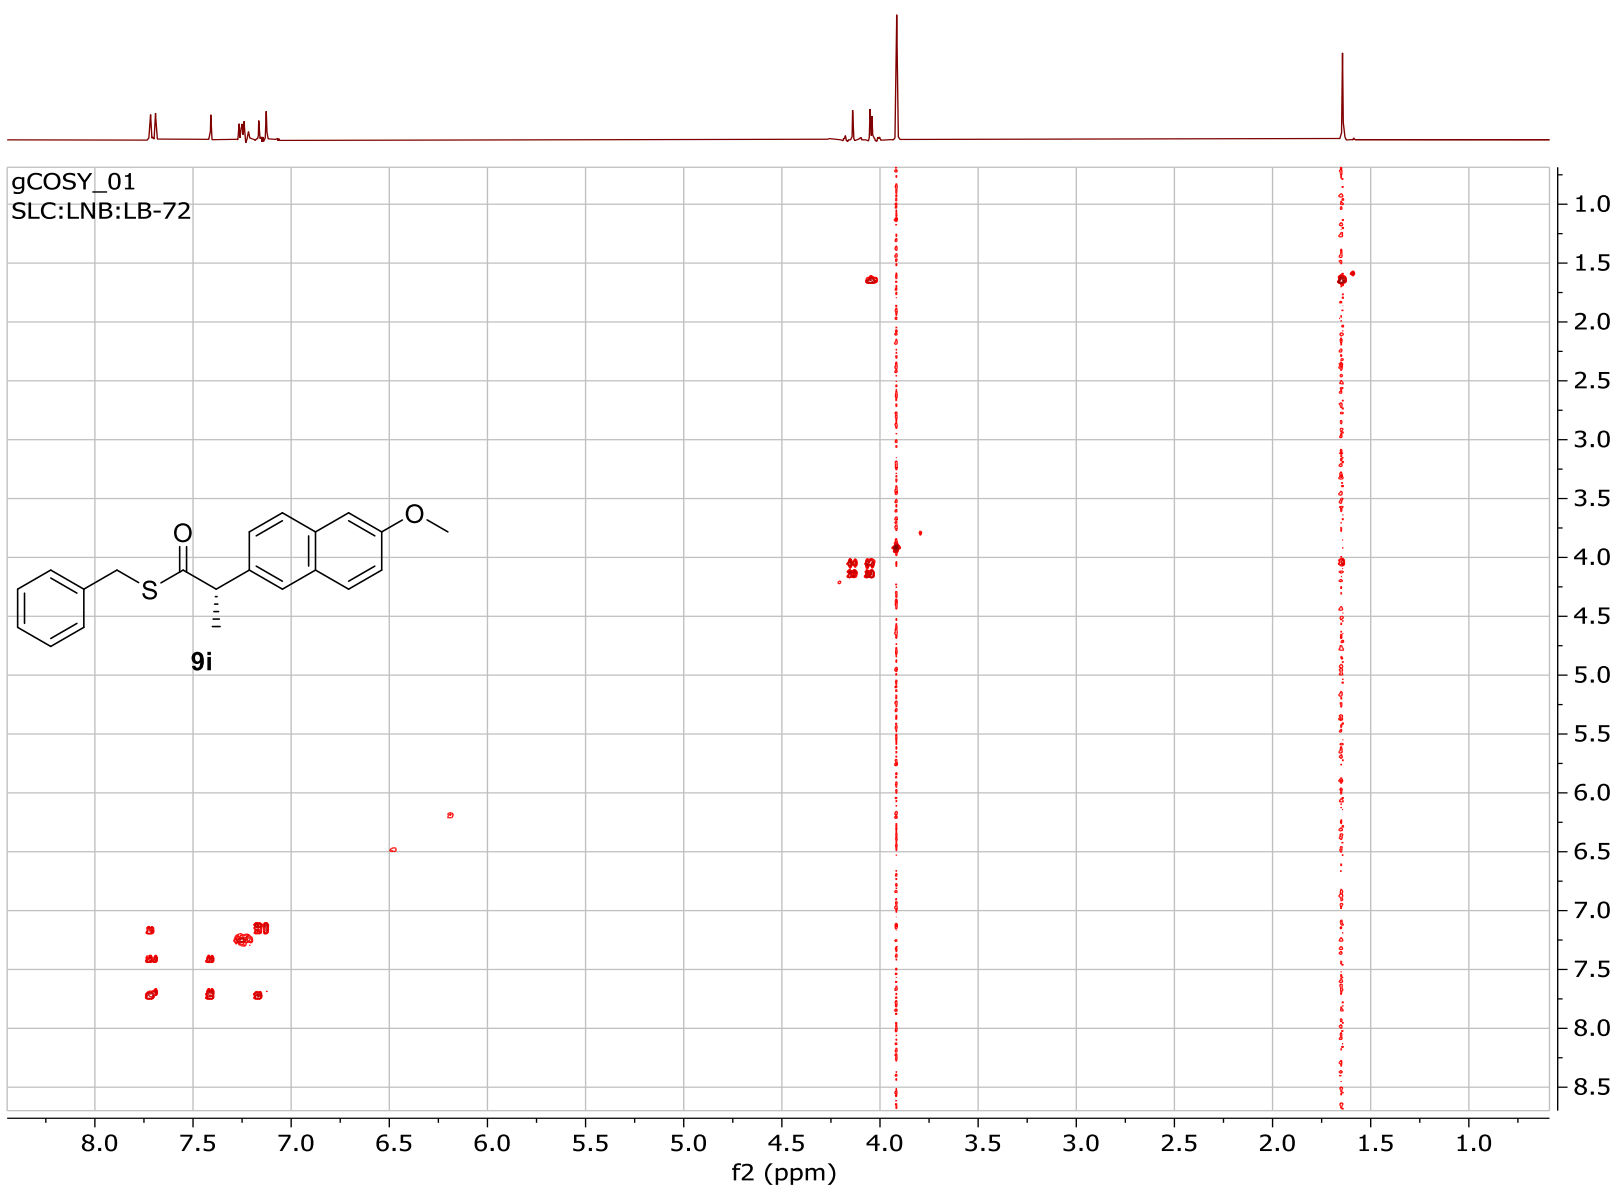

04151100.10.1.1r  
SLC:LNB:LB-002-59-F25-29-PURIFY  
Proton1.icon CDCl3 /home/nmr/10251100.10.1.1r

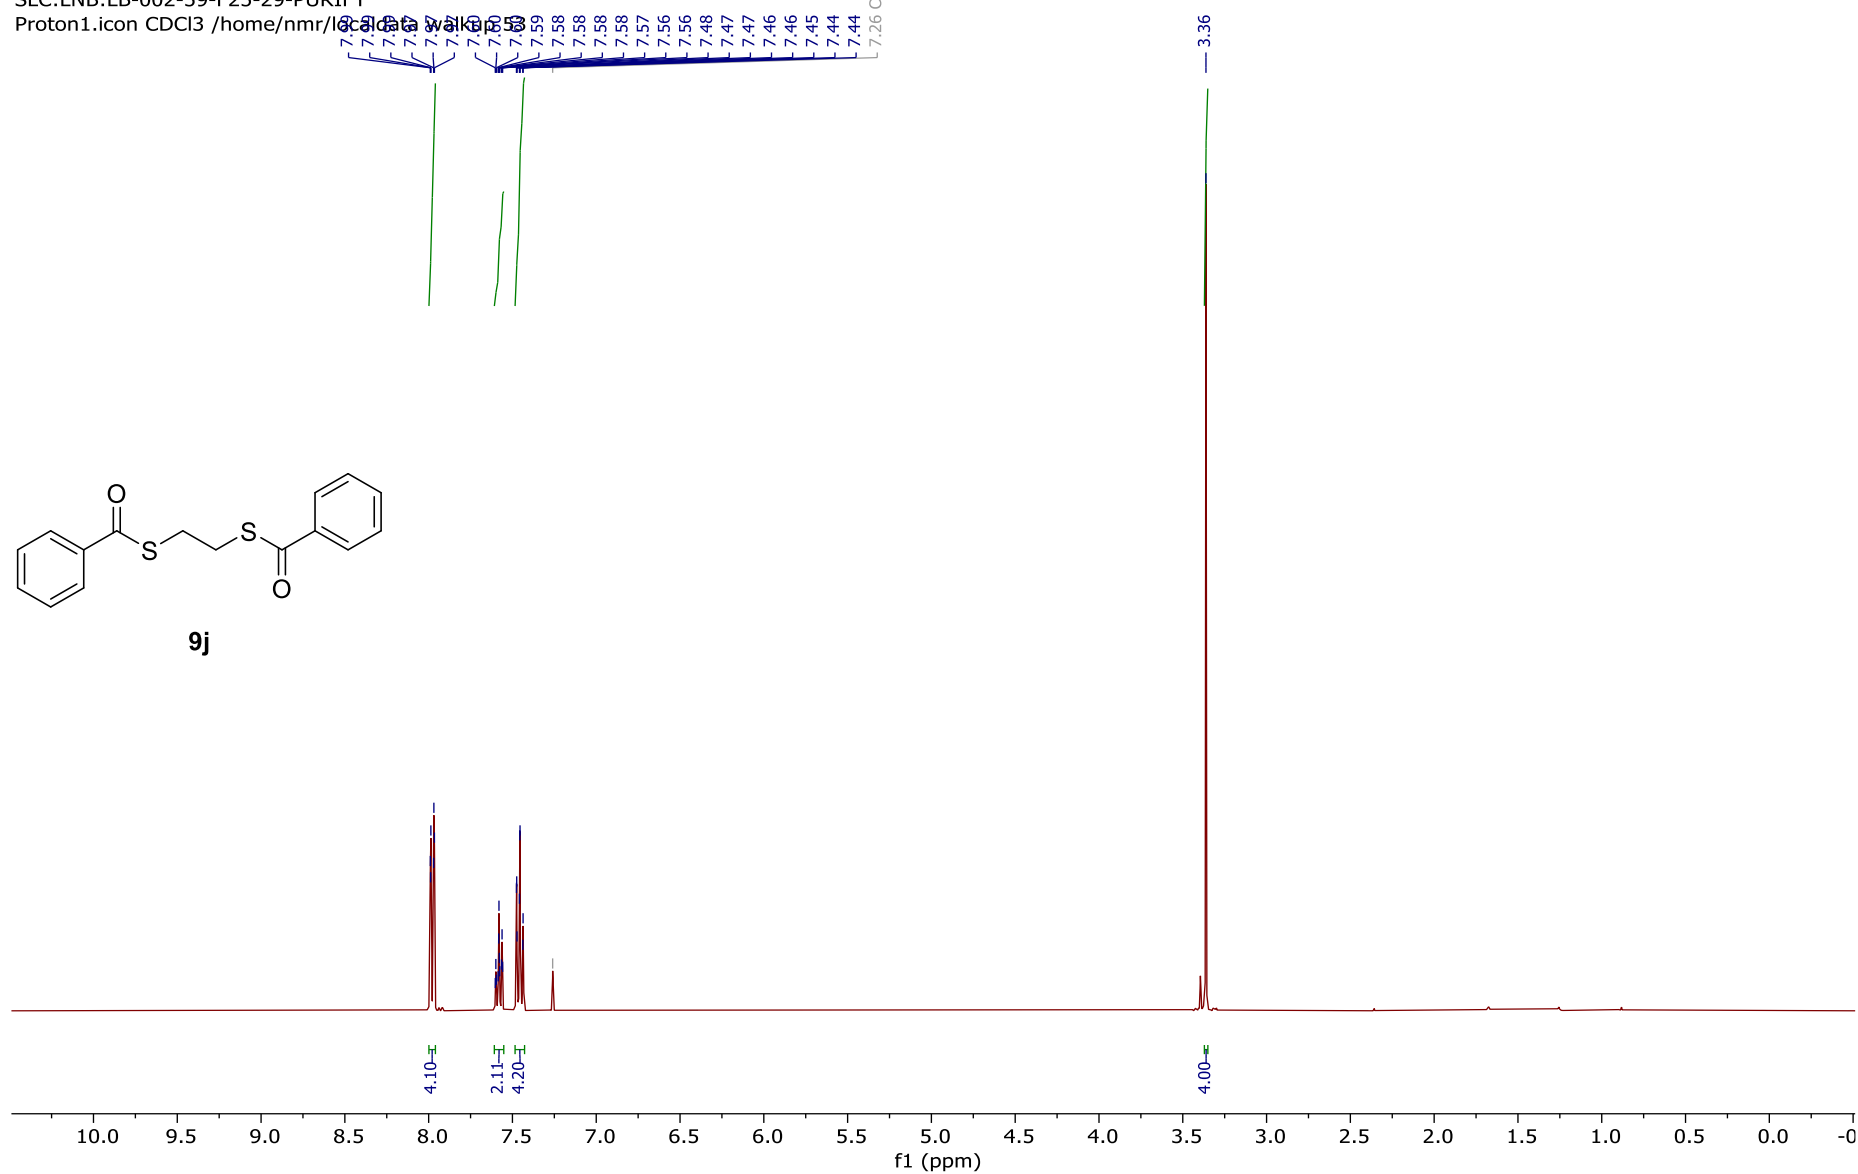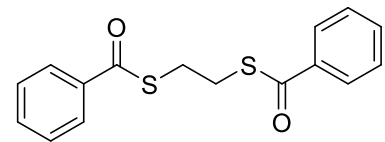

9j

04151100.11.1.1r  
SLC:LNB:LB-002-59-F25-29-PURIFY  
Carbon.dur CDCl3 /home/nmr/localdata walkup 53

136.84  
133.68  
128.76  
127.41

77.16 CDCl3

29.02

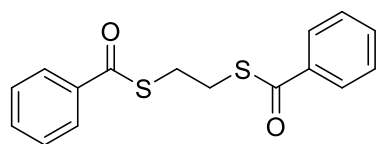

9j

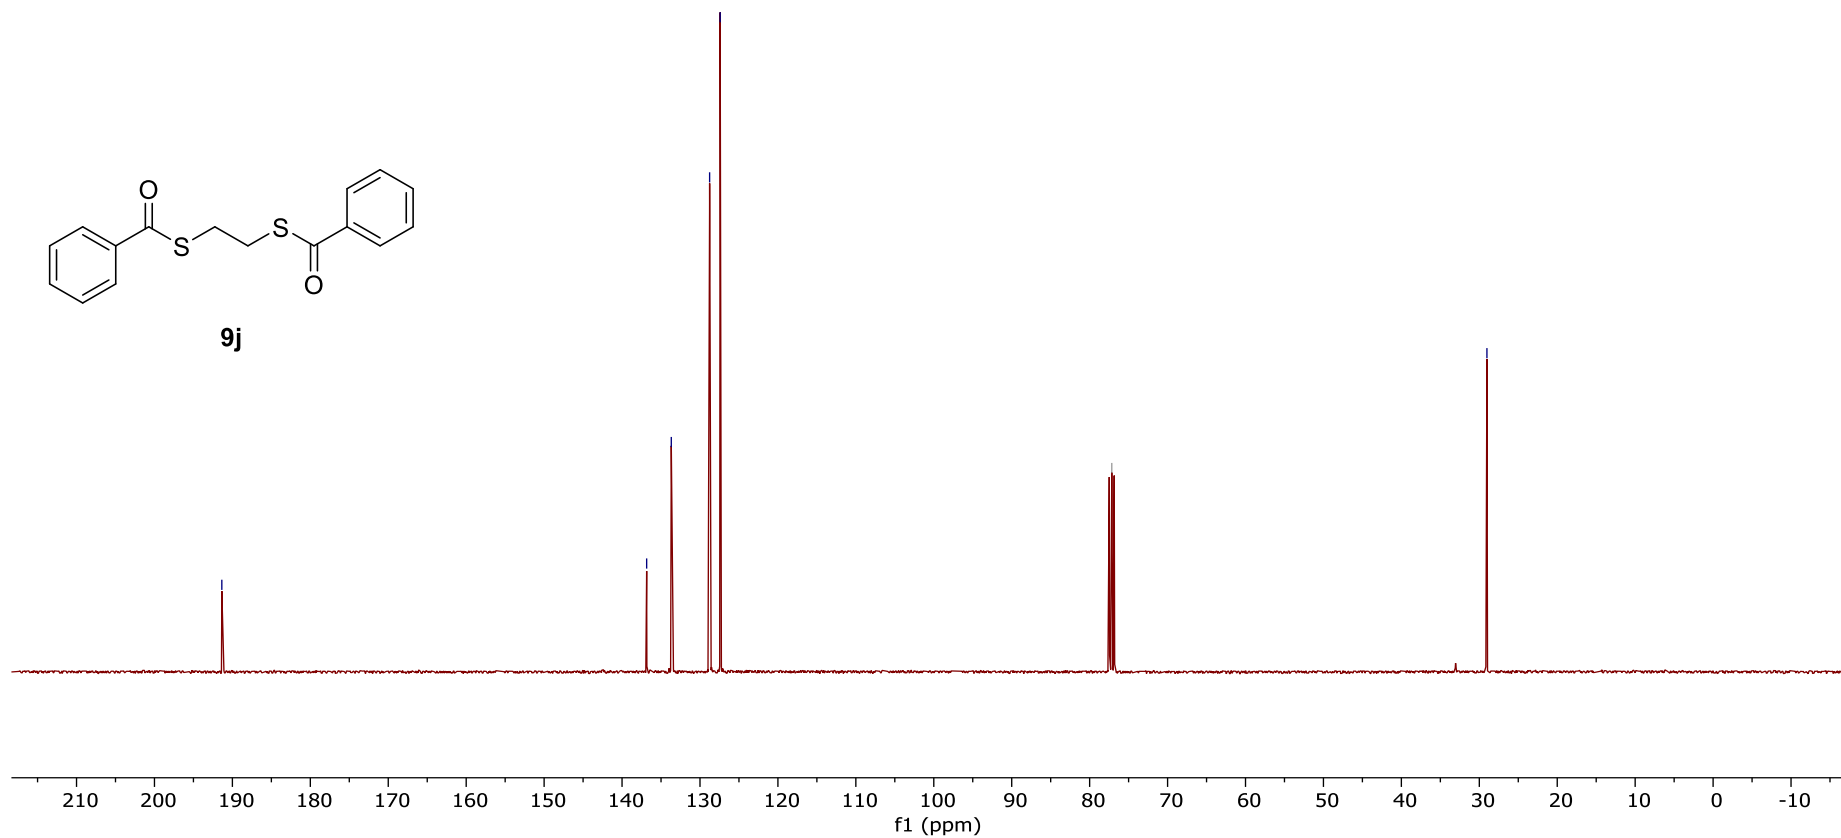

## References

1. A. M. Pandey, S. G. Agalave, C. P. Vinod and B. Gnanaprakasam, *Chem. Asian J.*, 2019, **14**, 3414-3423.
2. C. Devarajan, V. Vijayakumar, C. Ramalingam and R. Vijayaraghavan, *Res. Chem. Intermed.*, 2016, **42**, 5849-5858.
3. A. Jordan, K. D. Whymark, J. Sydenham and H. F. Sneddon, *Green Chem.*, 2021, **23**, 6405-6413.
4. M. Zhang, S. Zhang, G. Zhang, F. Chen and J. Cheng, *Tetrahedron Lett.*, 2011, **52**, 2480-2483.
5. S. Chun and Y. K. Chung, *Org. Lett.*, 2017, **19**, 3787-3790.
6. B. Lu, F. Zhu, H. M. Sun and Q. Shen, *Org. Lett.*, 2017, **19**, 1132-1135.
7. N. A. Laberge and J. A. Love, *Eur. J. Org. Chem.*, 2015, **2015**, 5546-5553.
8. L. L. Mittapelli and K. R. Gore, *Catal. Commun.*, 2021, **149**.
9. M. März, M. Kohout, T. Neveselý, J. Chudoba, D. Prukała, S. Niziński, M. Sikorski, G. Burdziński and R. Cibulka, *Org. Biomol. Chem.*, 2018, **16**, 6809-6817.
10. L. Liu, L. Yun, Z. Wang, X. Fu and C.-h. Yan, *Tetrahedron Lett.*, 2013, **54**, 5383-5386.
11. T. Wang, Y. Wang, K. Xu, Y. Zhang, J. Guo and L. Liu, *Eur. J. Org. Chem.*, 2021, **2021**, 3274-3277.
12. B. R. Kim, G. H. Sung, S.-G. Lee and Y. J. Yoon, *Tetrahedron*, 2013, **69**, 3234-3237.
13. R. A. Green, D. Pletcher, S. G. Leach and R. C. D. Brown, *Org. Lett.*, 2015, **17**, 3290-3293.
14. E. M. Kwon, C. G. Kim, A. R. Goh, J. Park and J. G. Jun, *Bull. Korean Chem. Soc.*, 2012, **33**, 1939-1944.
15. H. K. Moon, G. H. Sung, B. R. Kim, J. K. Park, Y. J. Yoon and H. J. Yoon, *Adv. Synth. Catal.*, 2016, **358**, 1725-1730.
16. S. A. Yakukhnov and V. P. Ananikov, *Adv. Synth. Catal.*, 2019, **361**, 4781-4789.
17. M. Ficker, S. W. Svenningsen, T. Larribeau and J. B. Christensen, *Tetrahedron Lett.*, 2018, **59**, 1125-1129.
18. L. Y. Jiang, J. J. Ming, L. Y. Wang, Y. Y. Jiang, L. H. Ren, Z. C. Wang and W. C. Cheng, *Green Chem.*, 2020, **22**, 1156-1163.
19. C.-S. Kuai, L.-C. Wang, J.-X. Xu and X.-F. Wu, *Org. Lett.*, 2022, **24**, 451-456.
20. N. S. Mahajani, R. I. L. Meador, T. J. Smith, S. E. Canarelli, A. A. Adhikari, J. P. Shah, C. M. Russo, D. R. Wallach, K. T. Howard, A. M. Millimaci and J. D. Chisholm, *J. Org. Chem.*, 2019, **84**, 7871-7882.
21. F. Legros, T. Martzel, J.-F. Brière, S. Oudeyer and V. Levacher, *Eur. J. Org. Chem.*, 2018, **2018**, 1975-1983.
22. S. Dey, S. K. Gadakh and A. Sudalai, *Org. Biomol. Chem.*, 2015, **13**, 10631-10640.
23. W. Wang, S. Tian and R. E. Stark, *J. Agric. Food. Chem.*, 2010, **58**, 1040-1045.
24. S. Qu, M. D. Greenhalgh and A. D. Smith, *Chemistry - A European Journal*, 2019, **25**, 2816-2823.
25. V. J. Roy, P. P. Sen and S. Raha Roy, *J. Org. Chem.*, 2021, **86**, 16965-16976.
26. M. Sandy, X. Zhu, Z. Rui and W. Zhang, *Org. Lett.*, 2013, **15**, 3396-3399.
27. M. Arisawa, T. Yamada and M. Yamaguchi, *Tetrahedron Lett.*, 2010, **51**, 6090-6092.
28. T. Xu, T. Cao, M. Yang, R. Xu, X. Nie and S. Liao, *Org. Lett.*, 2020, **22**, 3692-3696.
29. Q. Tian, S. Xu, C. Zhang, X. Liu, X. Wu and Y. Li, *J. Org. Chem.*, 2021, **86**, 8797-8804.
30. G.-p. Lu and C. Cai, *Adv. Synth. Catal.*, 2013, **355**, 1271-1276.
